# Supplementary material for: Healthy dietary patterns and the risk of individual chronic diseases in community-dwelling adults
Source: PubMed Central journal article supplement (PMC10593819; doi:10.1038/s41467-023-42523-9), 2023-10-23
Supplement: 41467_2023_42523_MOESM1_ESM.pdf [file 41467_2023_42523_MOESM1_ESM.pdf]

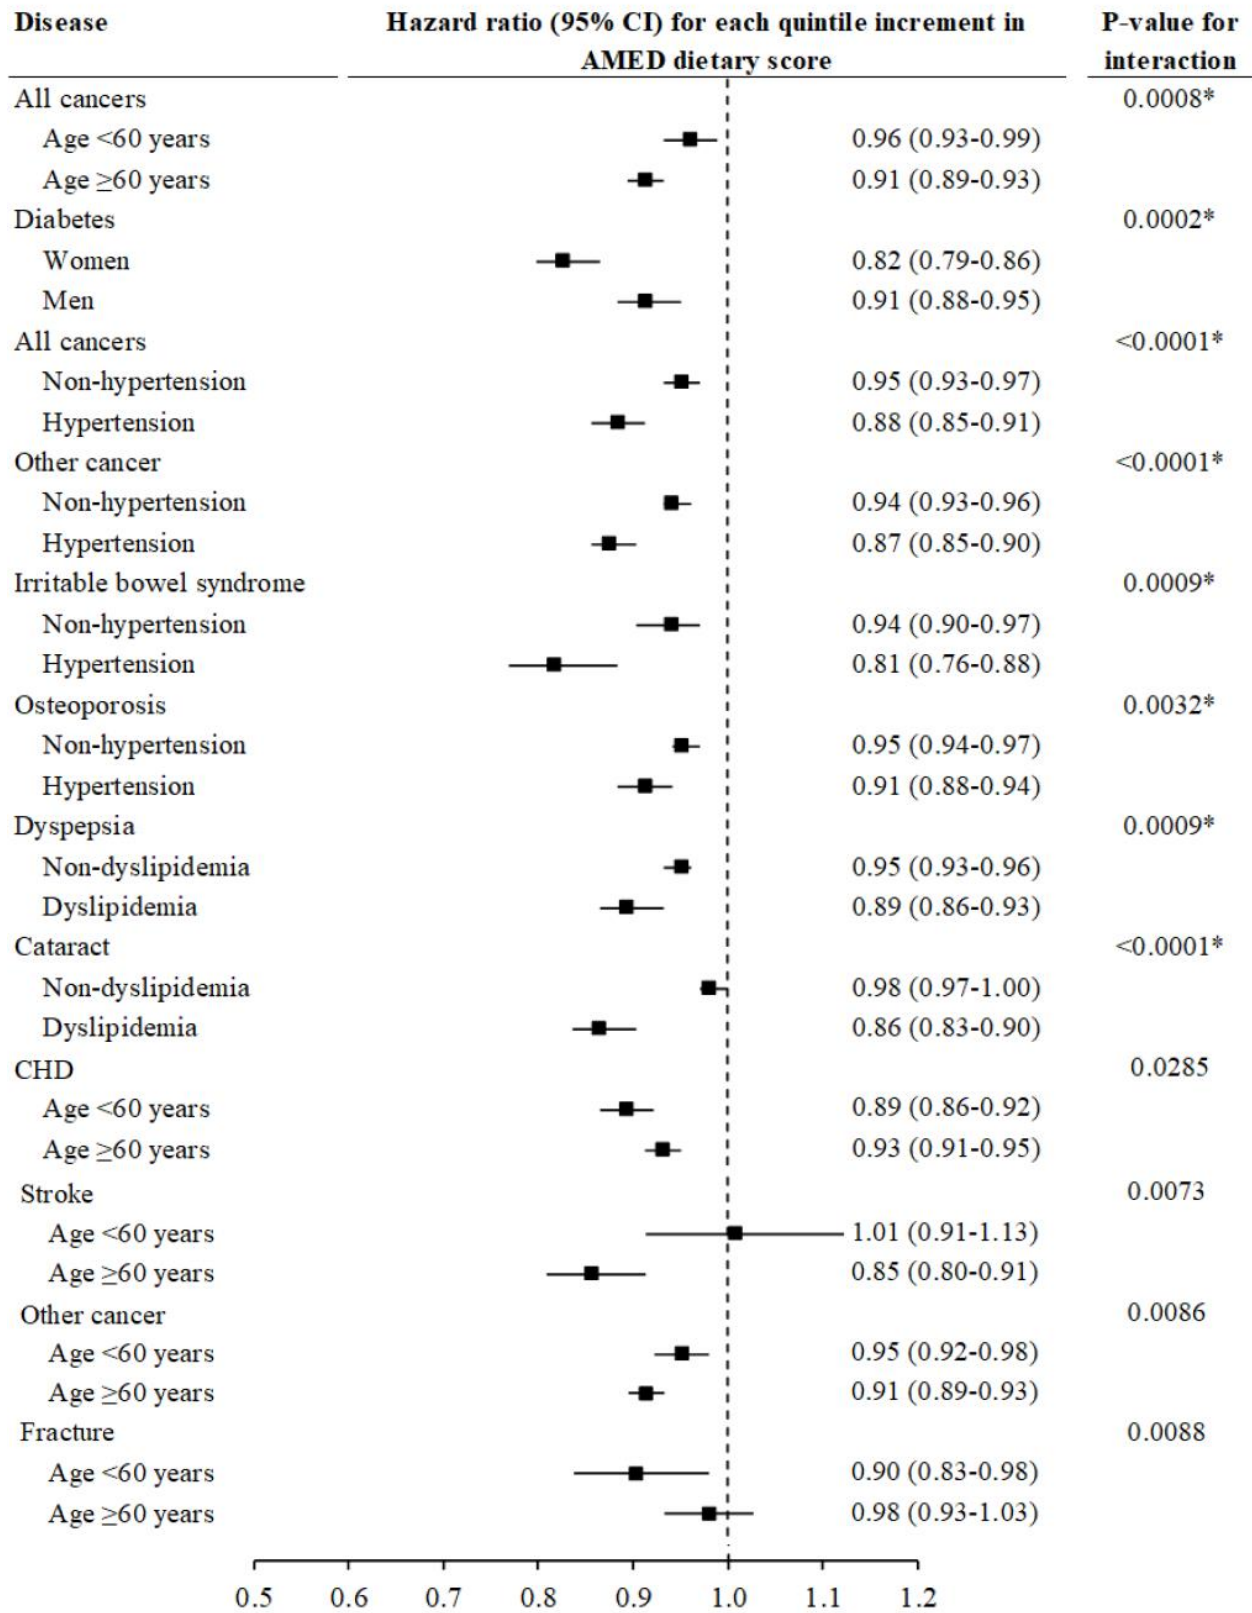

Continued

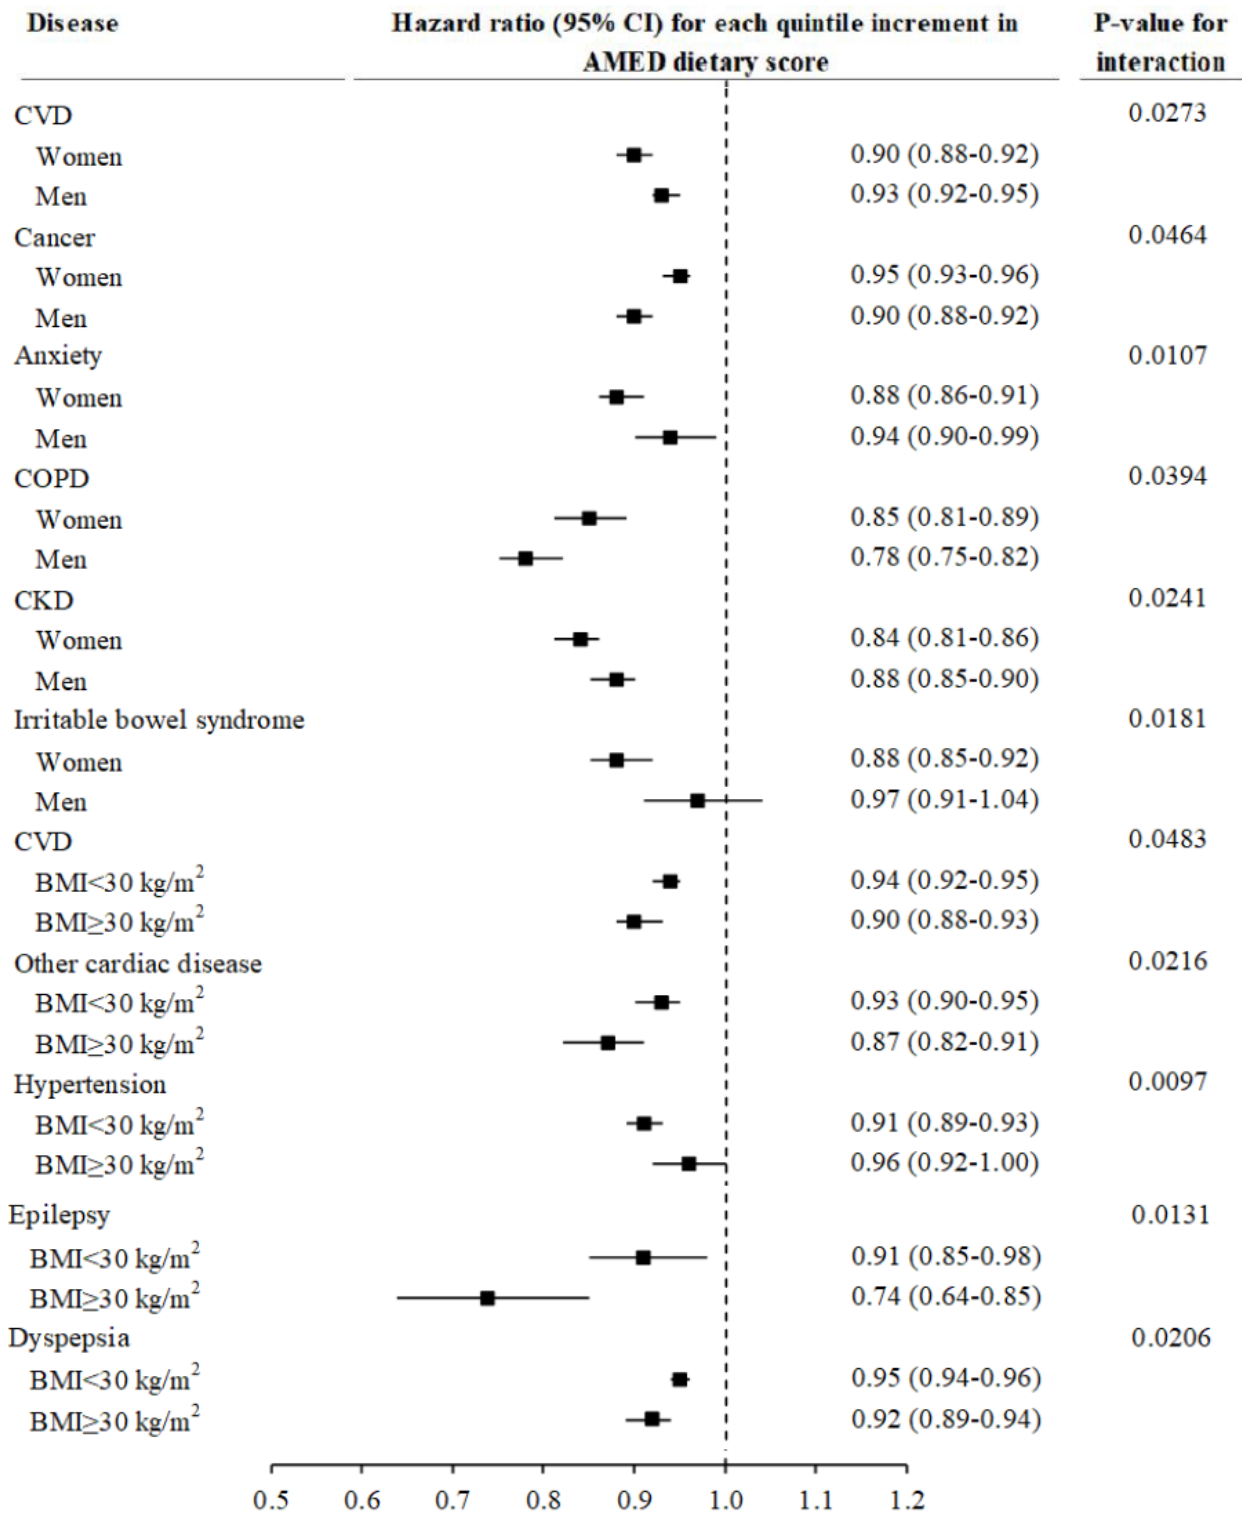

Continued

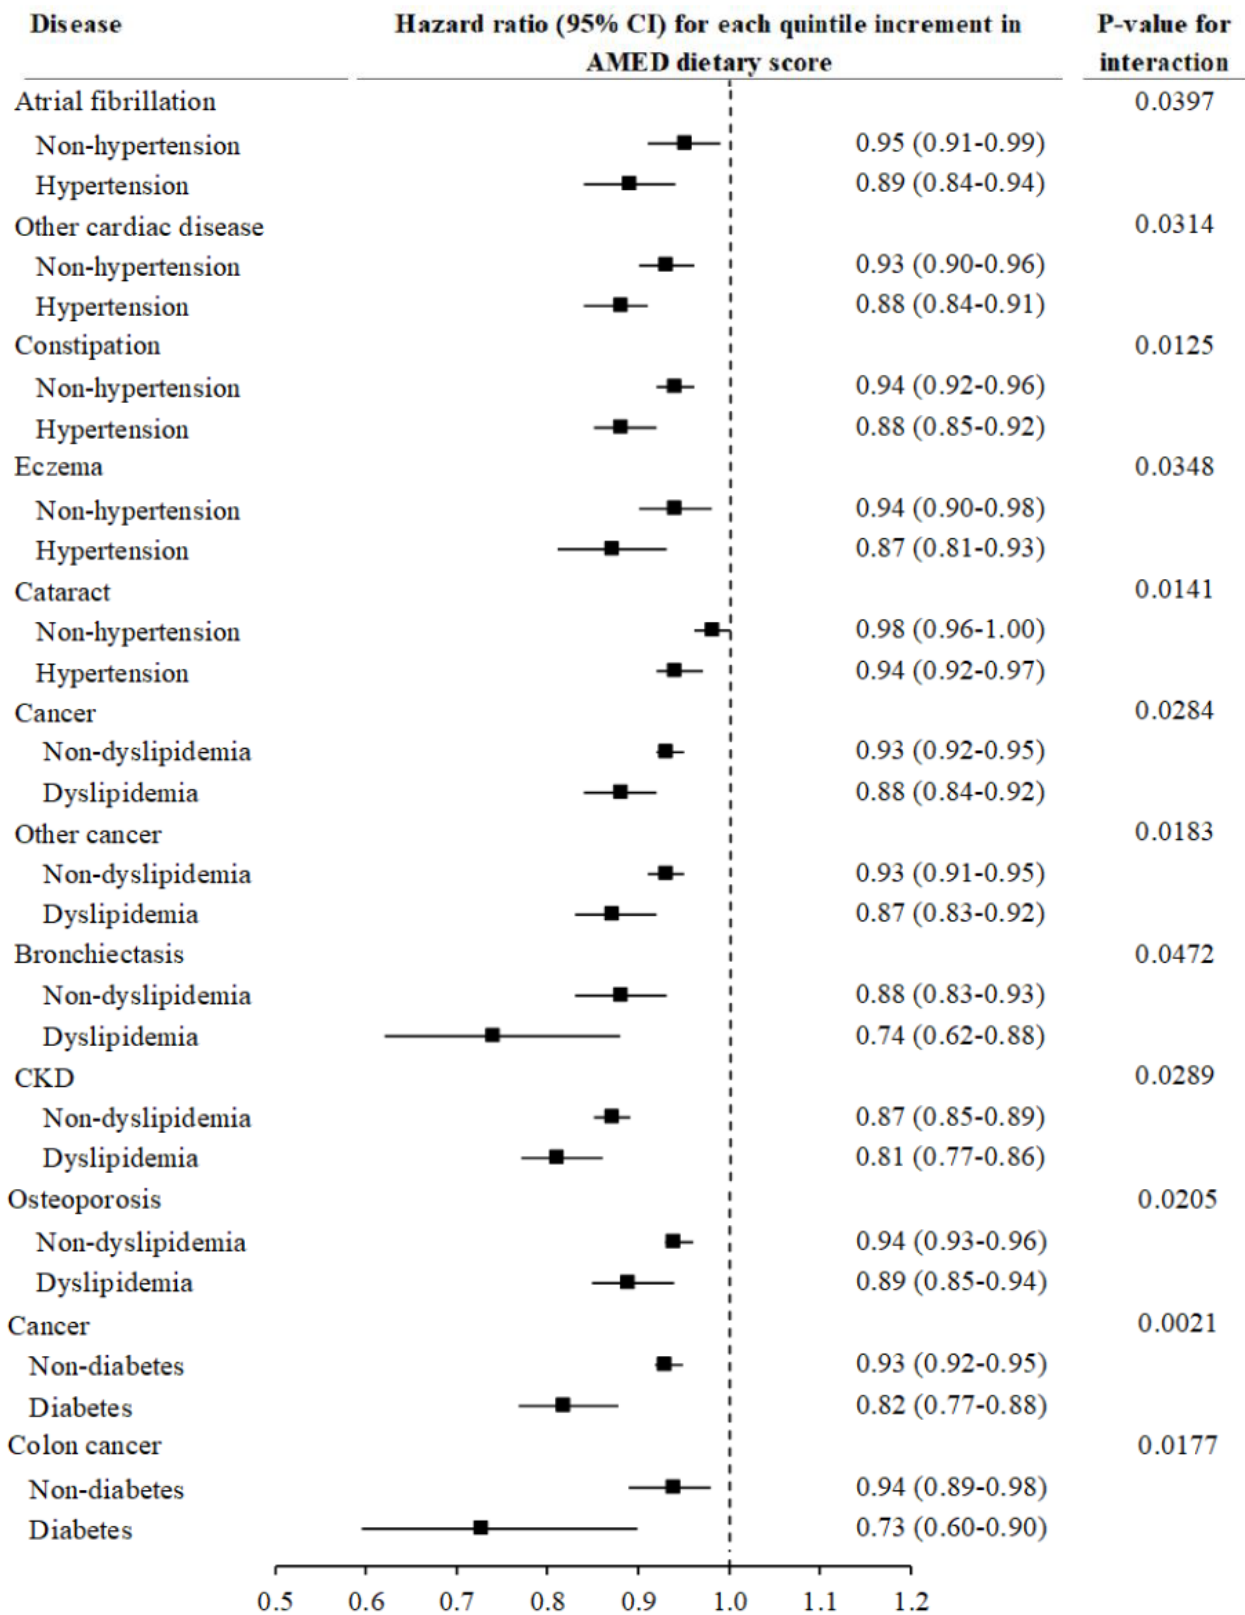

Continued

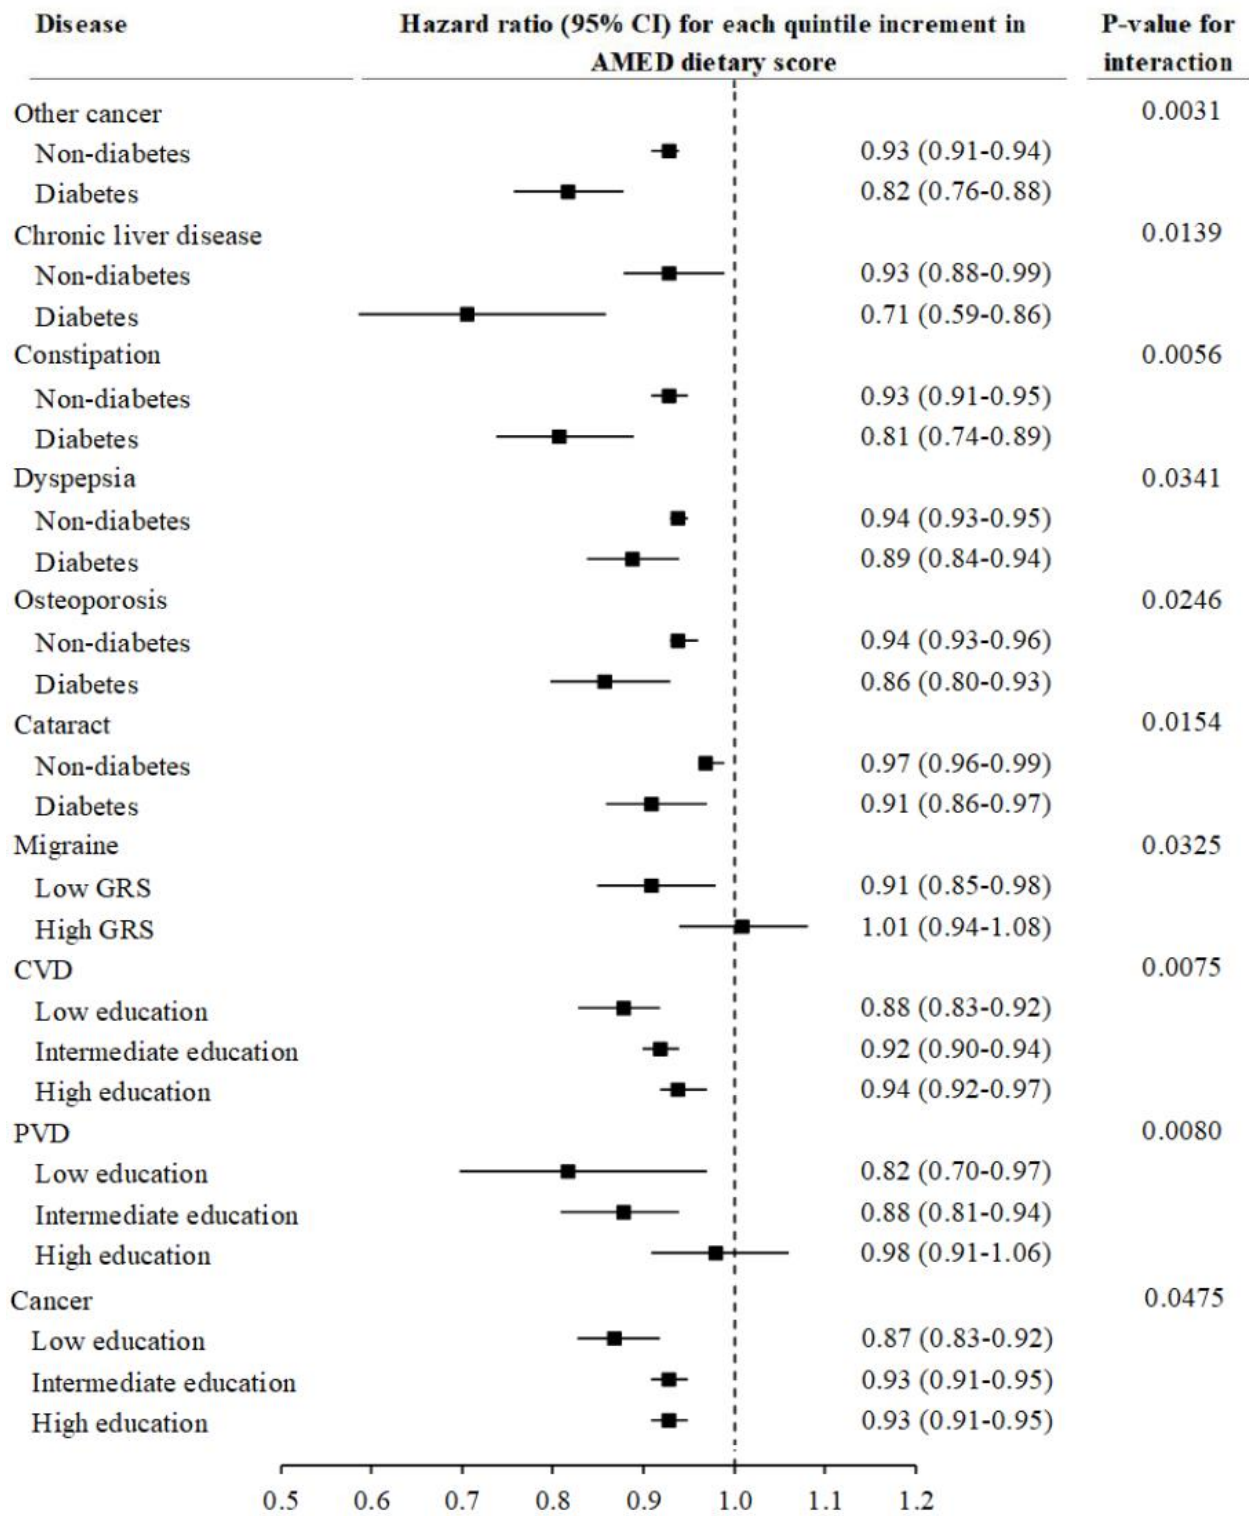

Continued

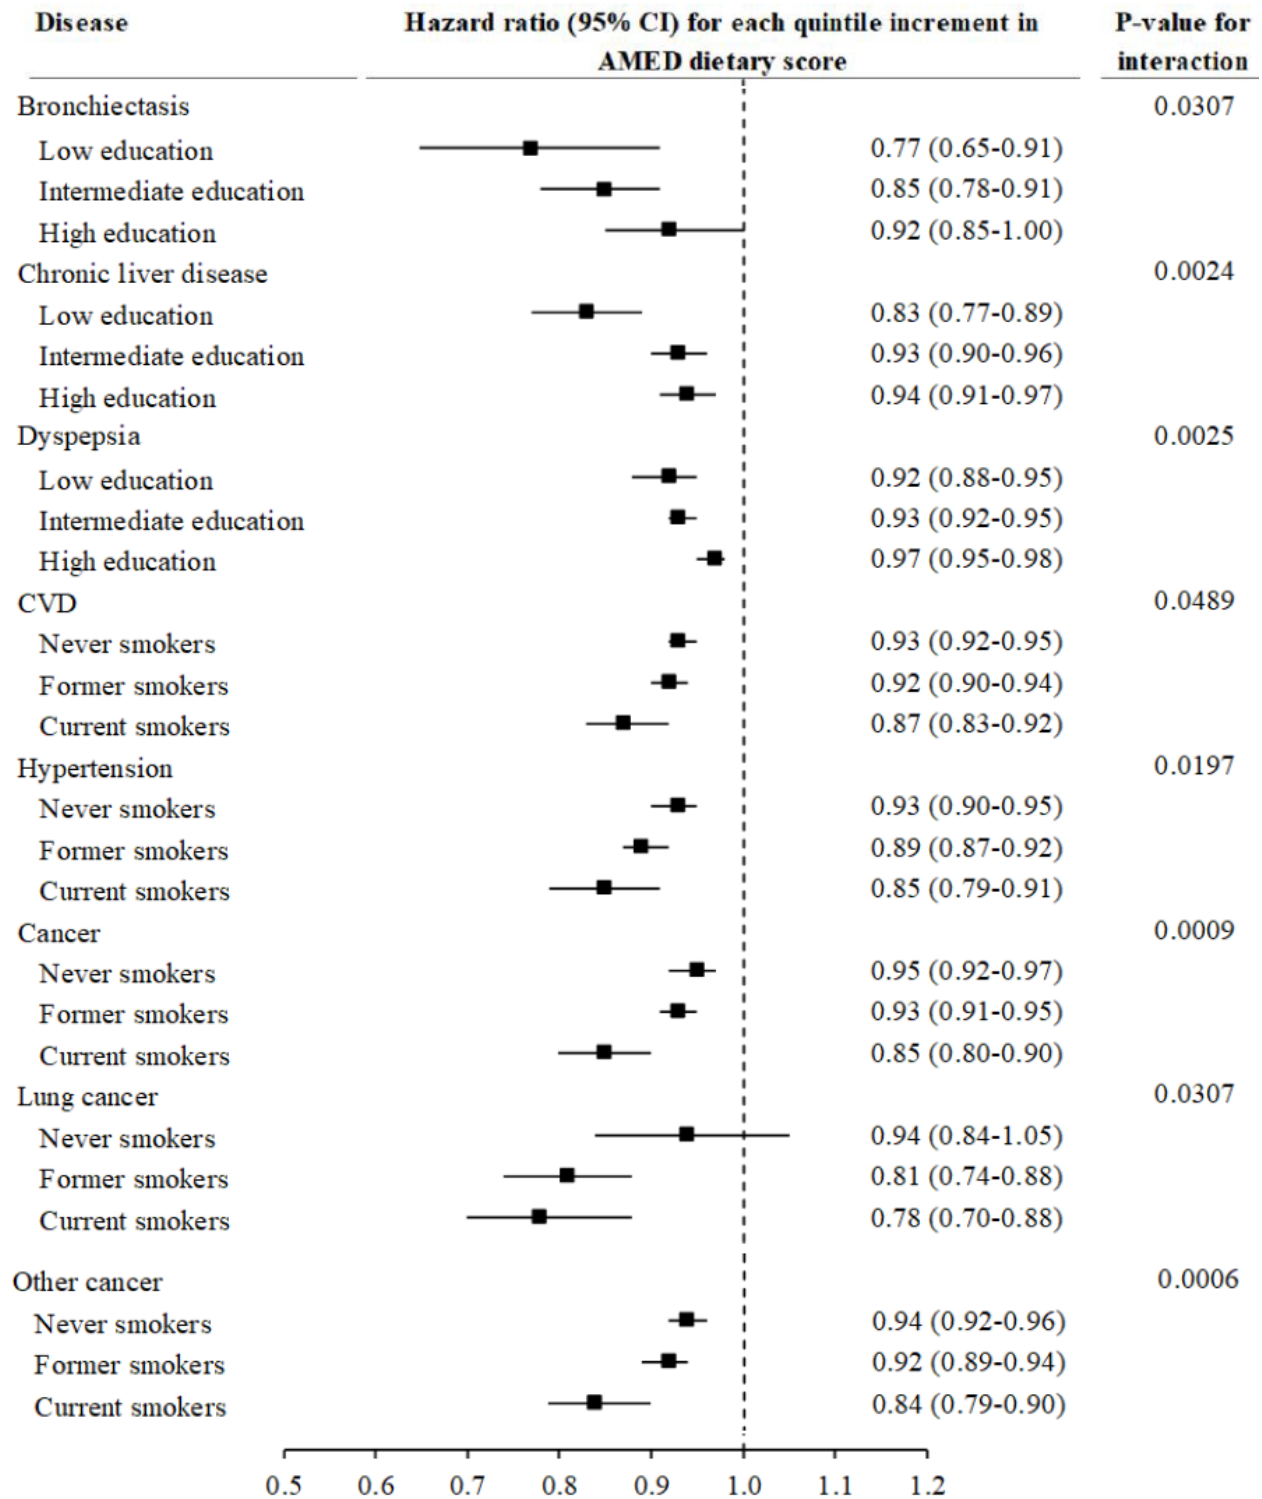

Continued

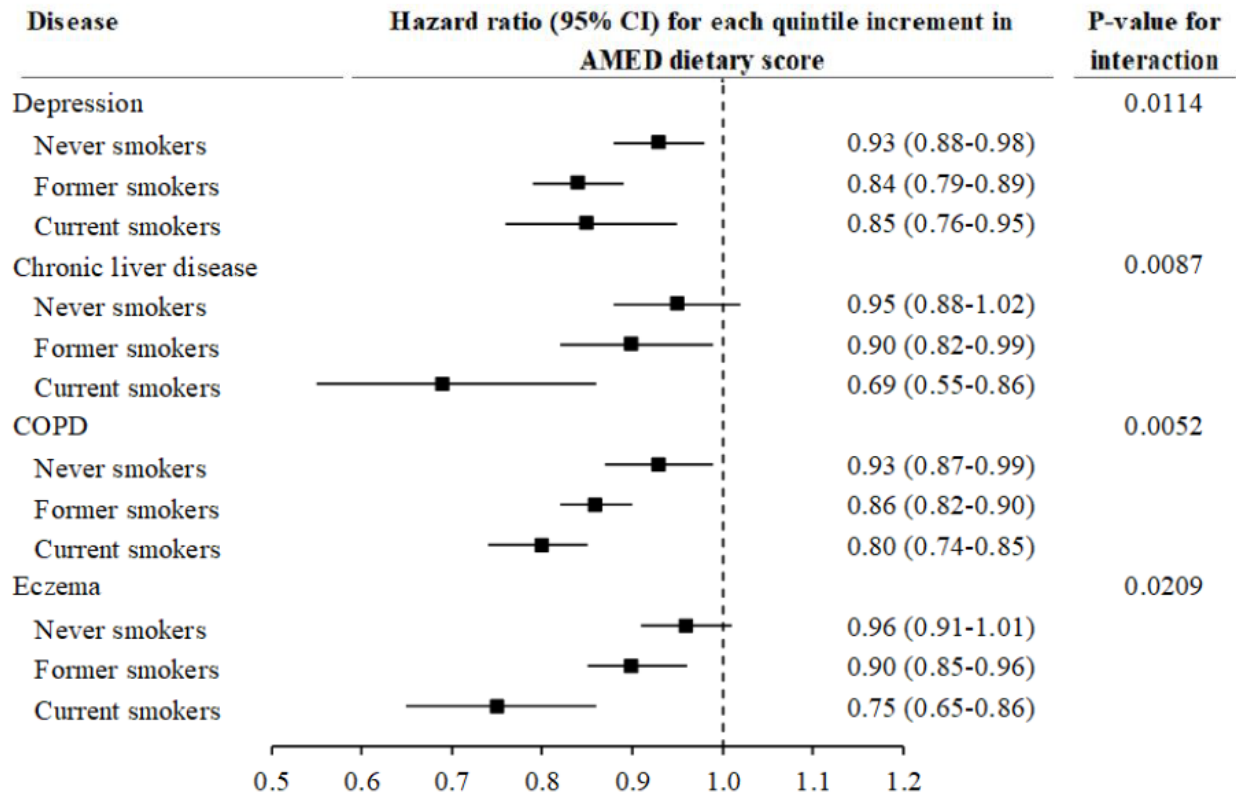

**Figure S1. The association between the Alternate Mediterranean Diet Index and the risk of individual chronic diseases moderated by important factors**

BMI, body mass index; CHD, coronary heart disease; CKD, chronic kidney disease; COPD, chronic obstructive pulmonary disease; CVD, cardiovascular disease; GRS, genetic risk score; PVD, peripheral artery disease.

Cardiovascular disease includes coronary heart disease, heart failure, atrial fibrillation, other cardiac disease, stroke, and peripheral vascular disease. All cancers encompass any type of cancer except for non-melanoma skin cancer. Cox proportional regression models were used to test whether the association between the Alternate Mediterranean Diet Index and the risk of 48 individual chronic diseases was moderated by age, sex, obesity, hypertension, diabetes, dyslipidemia, GRS for longevity, and education. Horizontal lines indicate the range of the 95% confidence interval. The vertical dash lines represent the hazard ratio of 1. Only the results with significant interaction (P-value <0.05) are shown in this figure.

\* Indicates significant interaction while controlling for false discovery rate (FDR), with two-sided statistical tests.

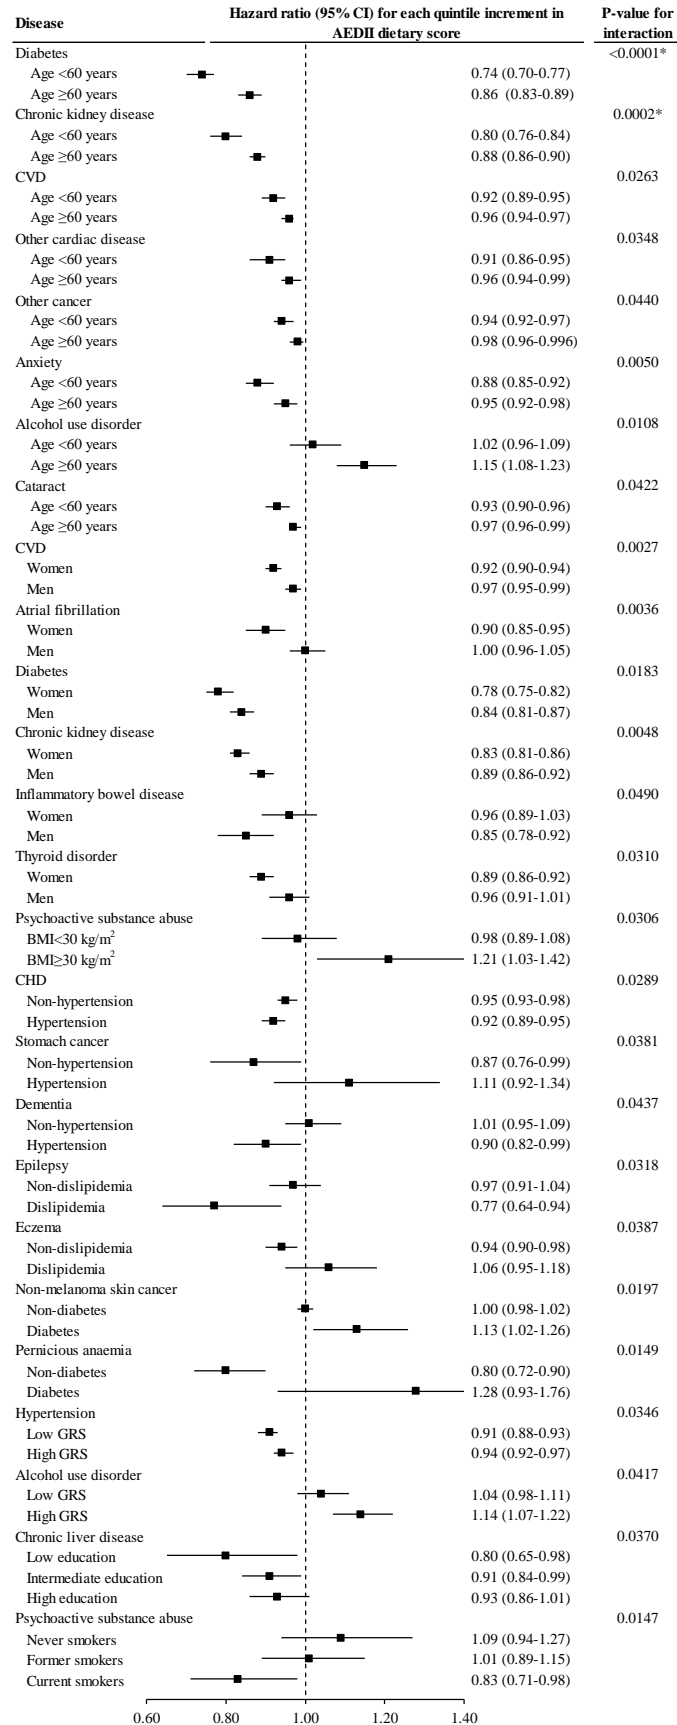



**Figure S2. The association between the Anti-Empirical Dietary Inflammatory Index and the risk of individual chronic diseases moderated by important factors**

BMI, body mass index; CHD, coronary heart disease; CVD, cardiovascular disease; GRS, genetic risk score.

Cardiovascular disease includes coronary heart disease, heart failure, atrial fibrillation, other cardiac disease, stroke, and peripheral vascular disease. Cox proportional regression models were used to test whether the association between the Anti-Empirical Dietary Inflammatory Index and the risk of 48 individual chronic diseases was moderated by age, sex, obesity, hypertension, diabetes, dyslipidemia, GRS for longevity, and education. Horizontal lines indicate the range of the 95% confidence interval. The vertical dash lines represent the hazard ratio of 1. Only the results with significant interaction (P-value <0.05) are shown in this figure.

\*Indicates significant interaction while controlling for false discovery rate (FDR), with two-sided statistical tests.

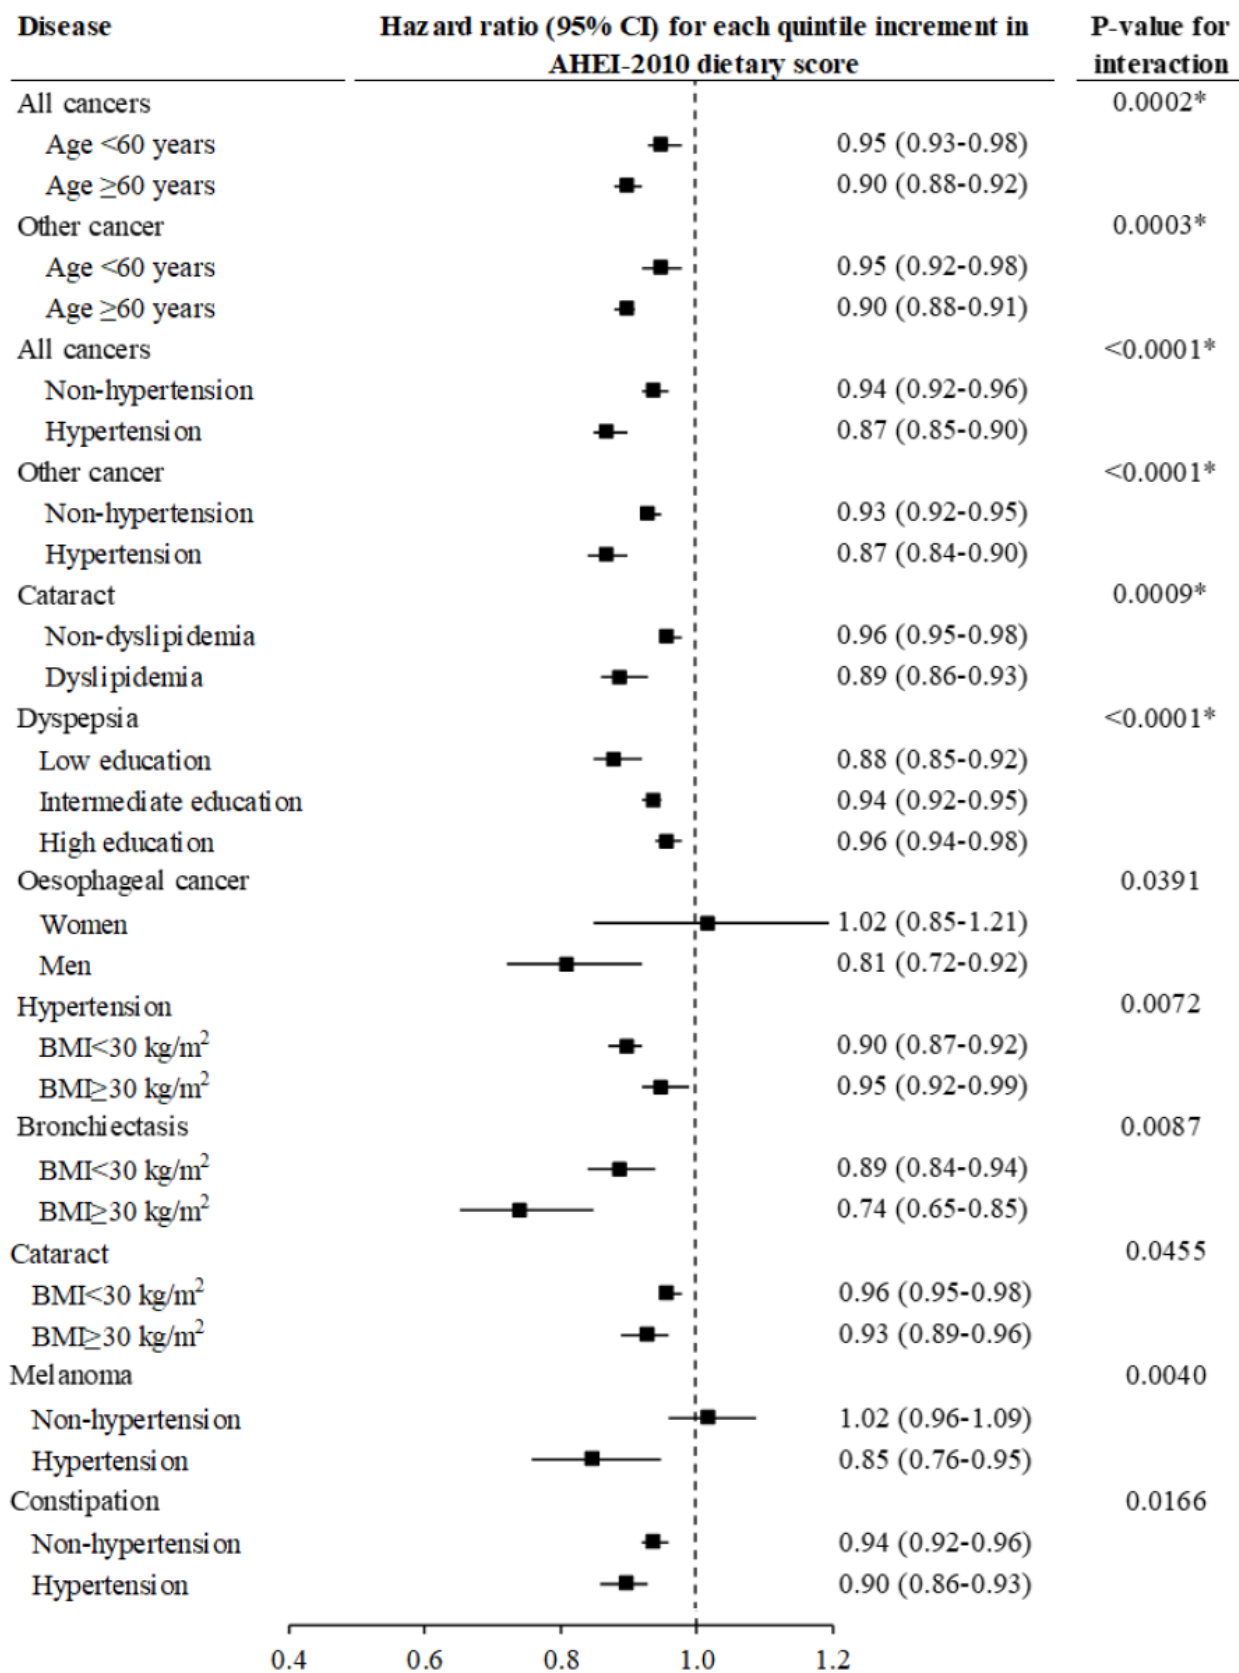

Continued

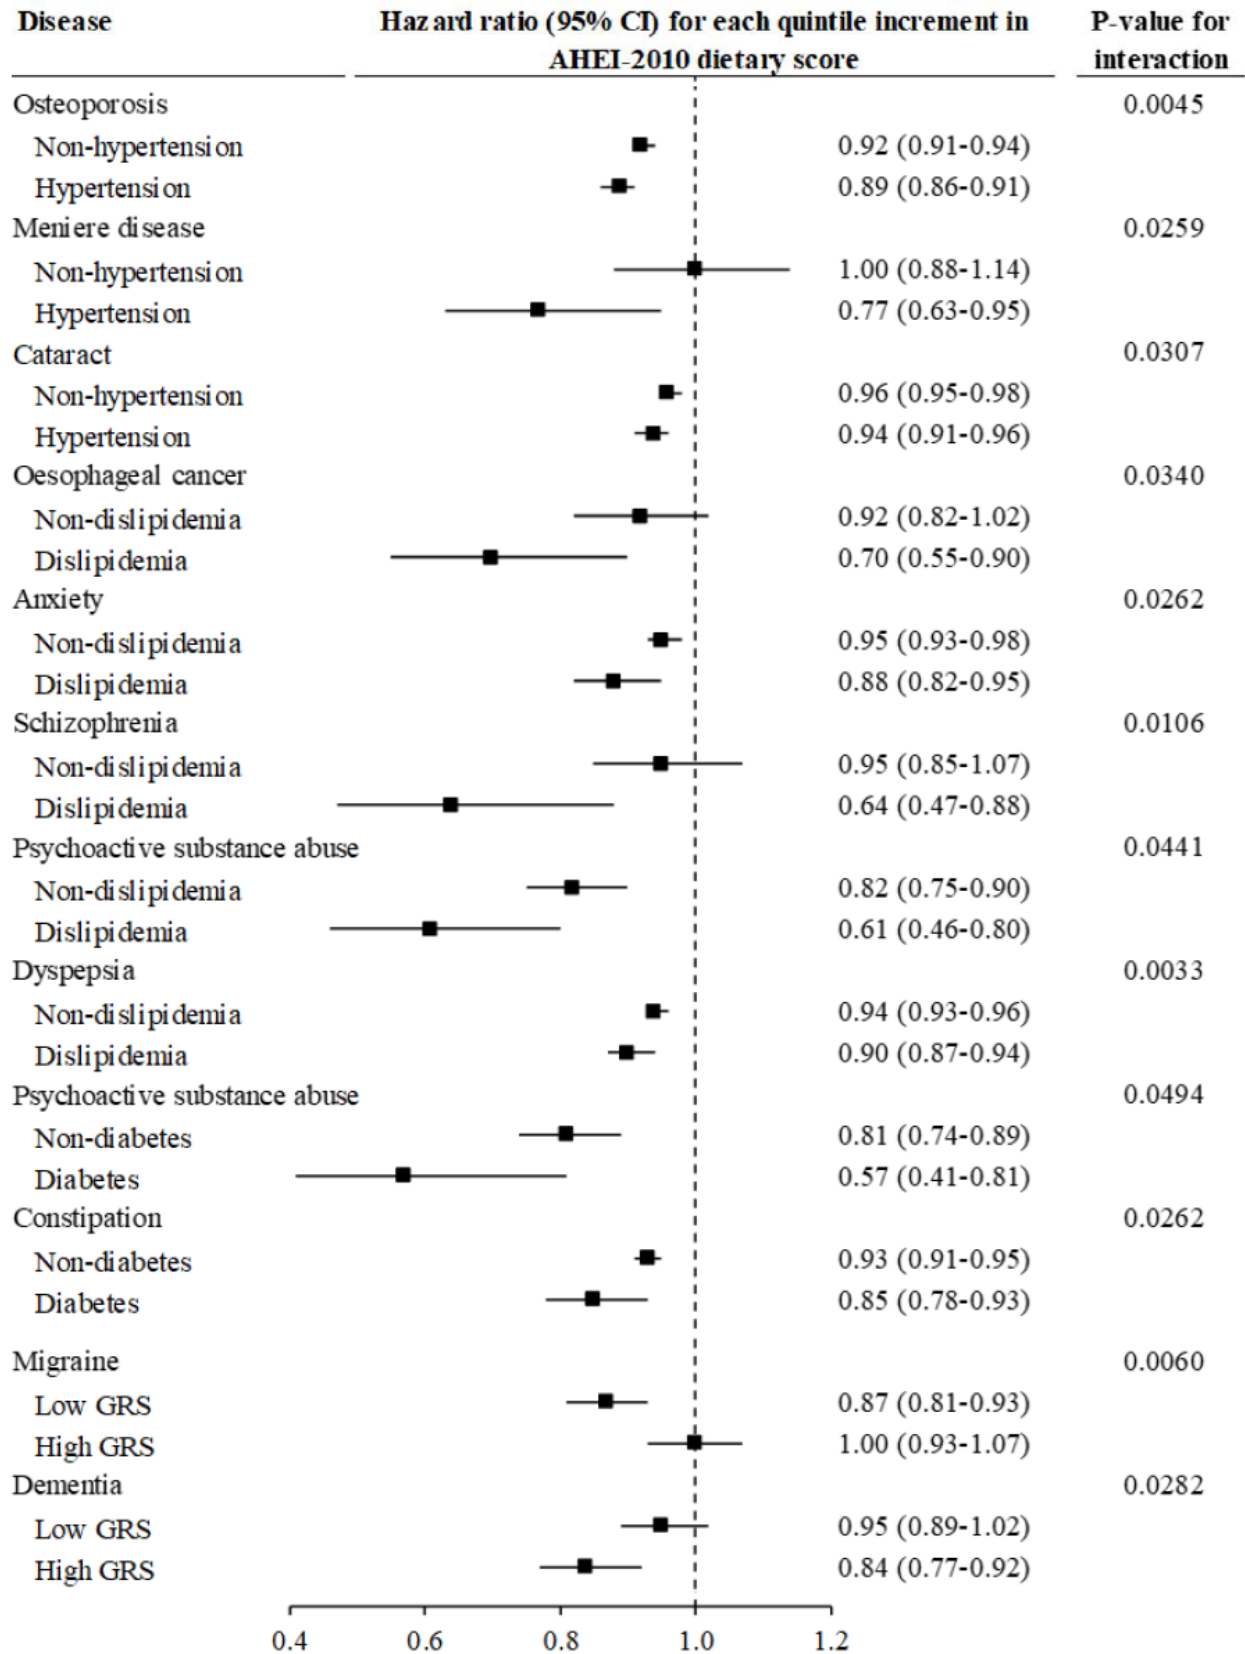

Continued

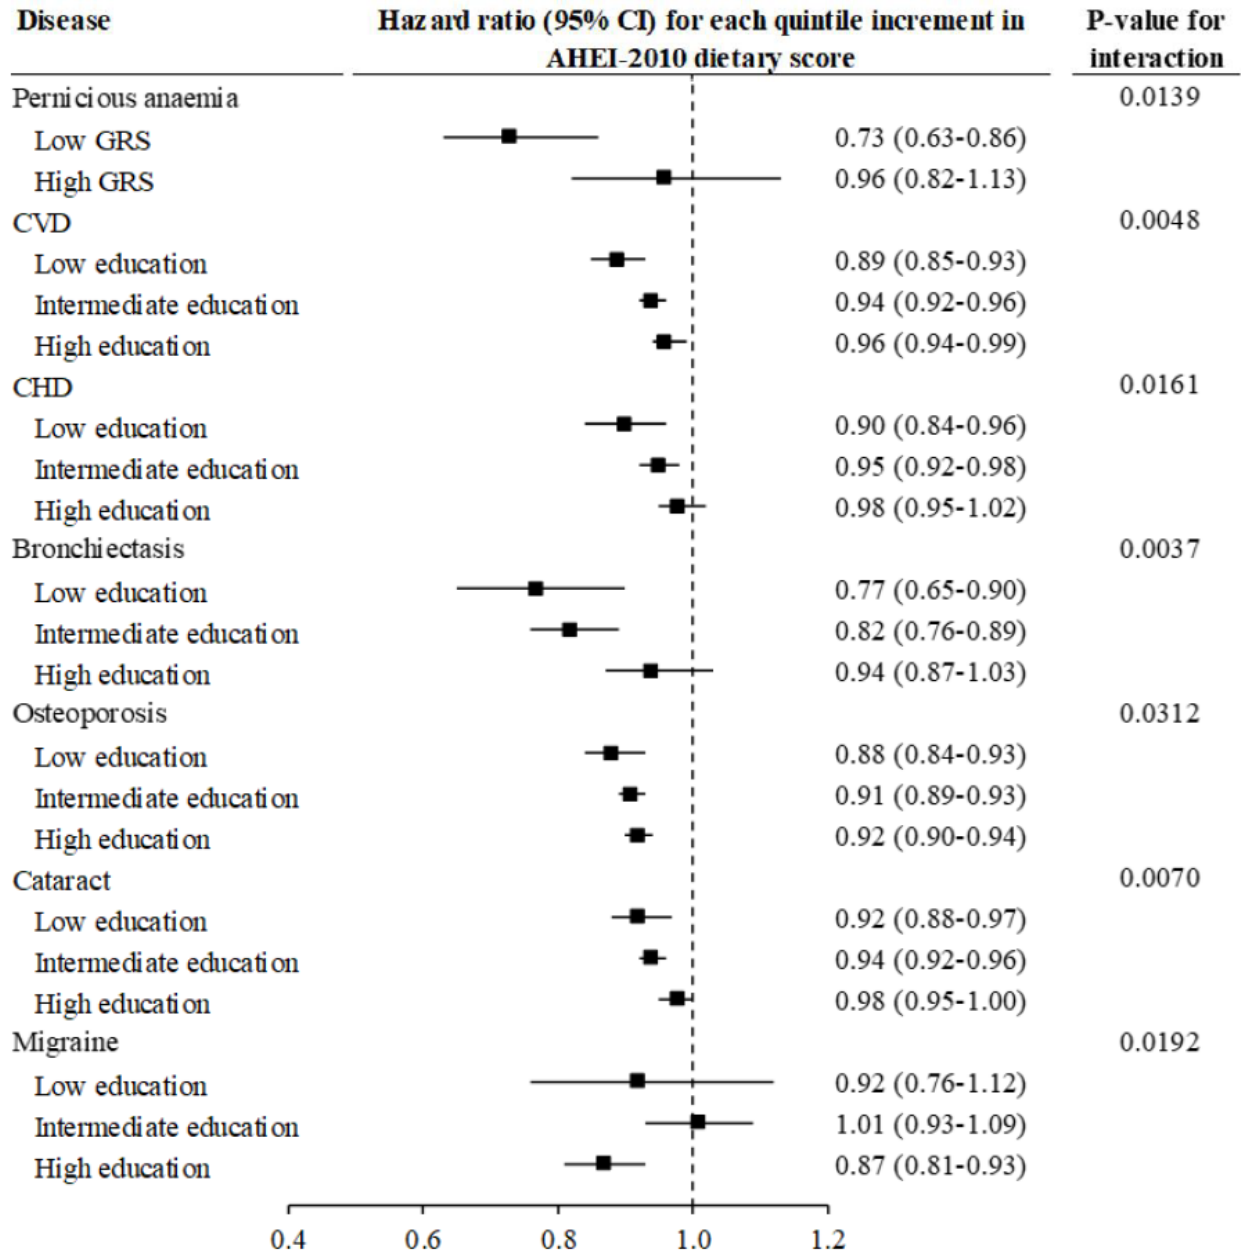

**Figure S3. The association between the Alternate Healthy Eating Index-2010 and the risk of individual chronic diseases moderated by important factors**

BMI, body mass index; CHD, coronary heart disease; CVD, cardiovascular disease; GRS, genetic risk score.

Cardiovascular disease includes coronary heart disease, heart failure, atrial fibrillation, other cardiac disease, stroke, and peripheral vascular disease. All cancers encompass any type of cancer except for non-melanoma skin cancer. Cox proportional regression models were used to test whether the association between the Alternate Healthy Eating Index-2010 and the risk of 48 individual chronic diseases was moderated by age, sex, obesity, hypertension, diabetes, dyslipidemia, GRS for longevity, and education. Horizontal lines indicate the range of the 95% confidence interval. The vertical dash lines represent the hazard ratio of 1. Only the results with significant interaction (P-value <0.05) are shown in this figure.

\*Indicates significant interaction while controlling for false discovery rate (FDR), with two-sided statistical tests.

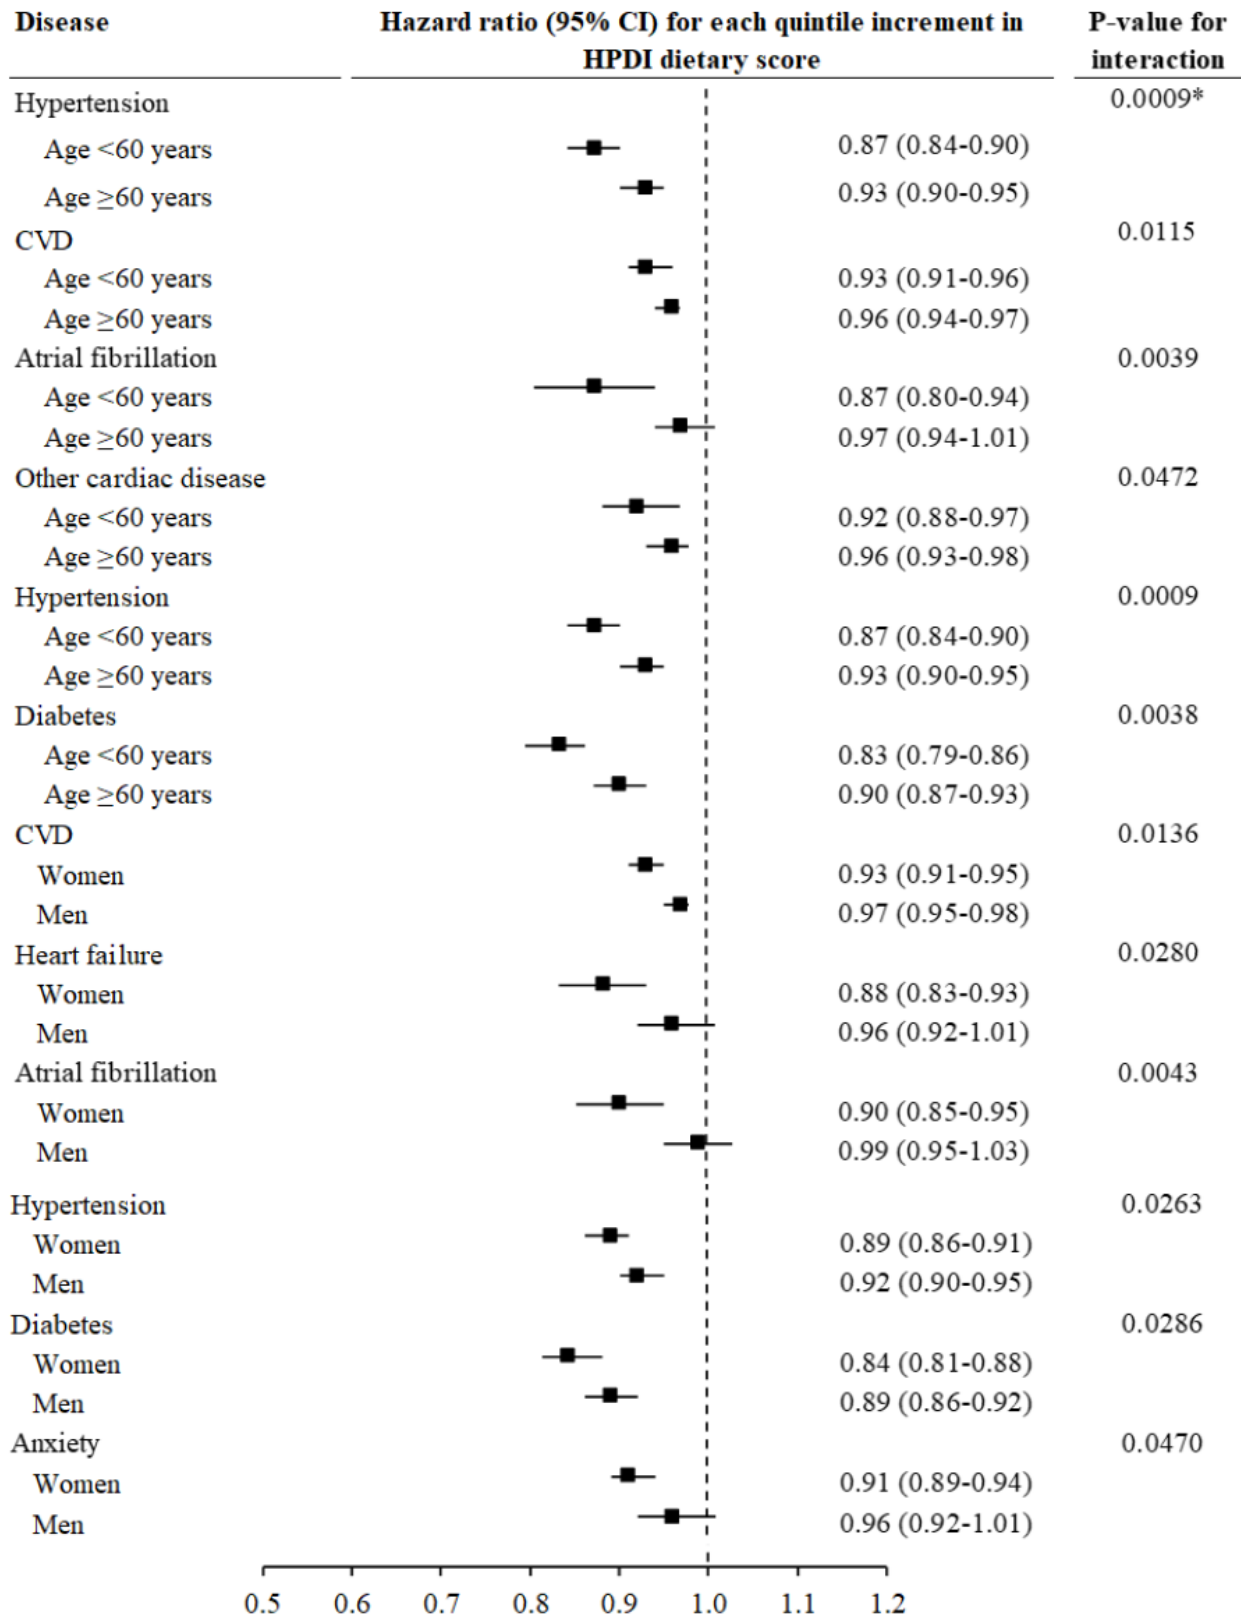

Continued

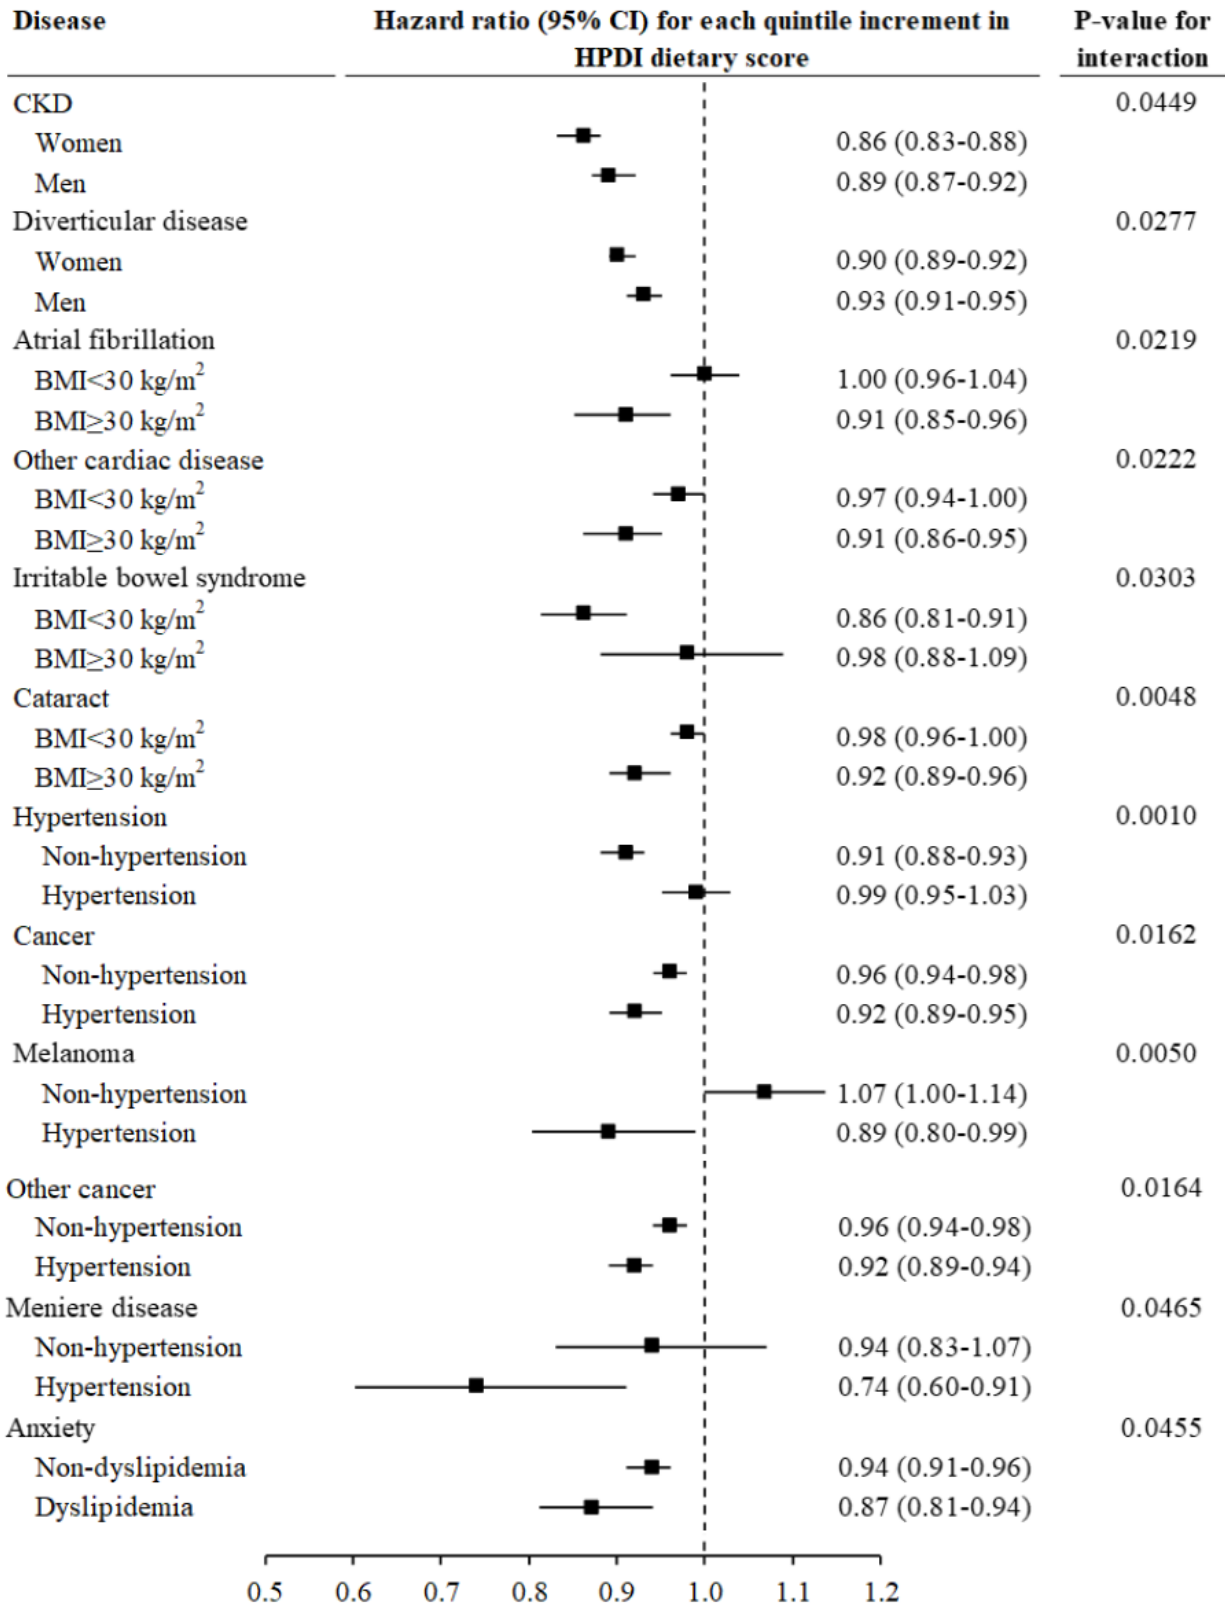

Continued

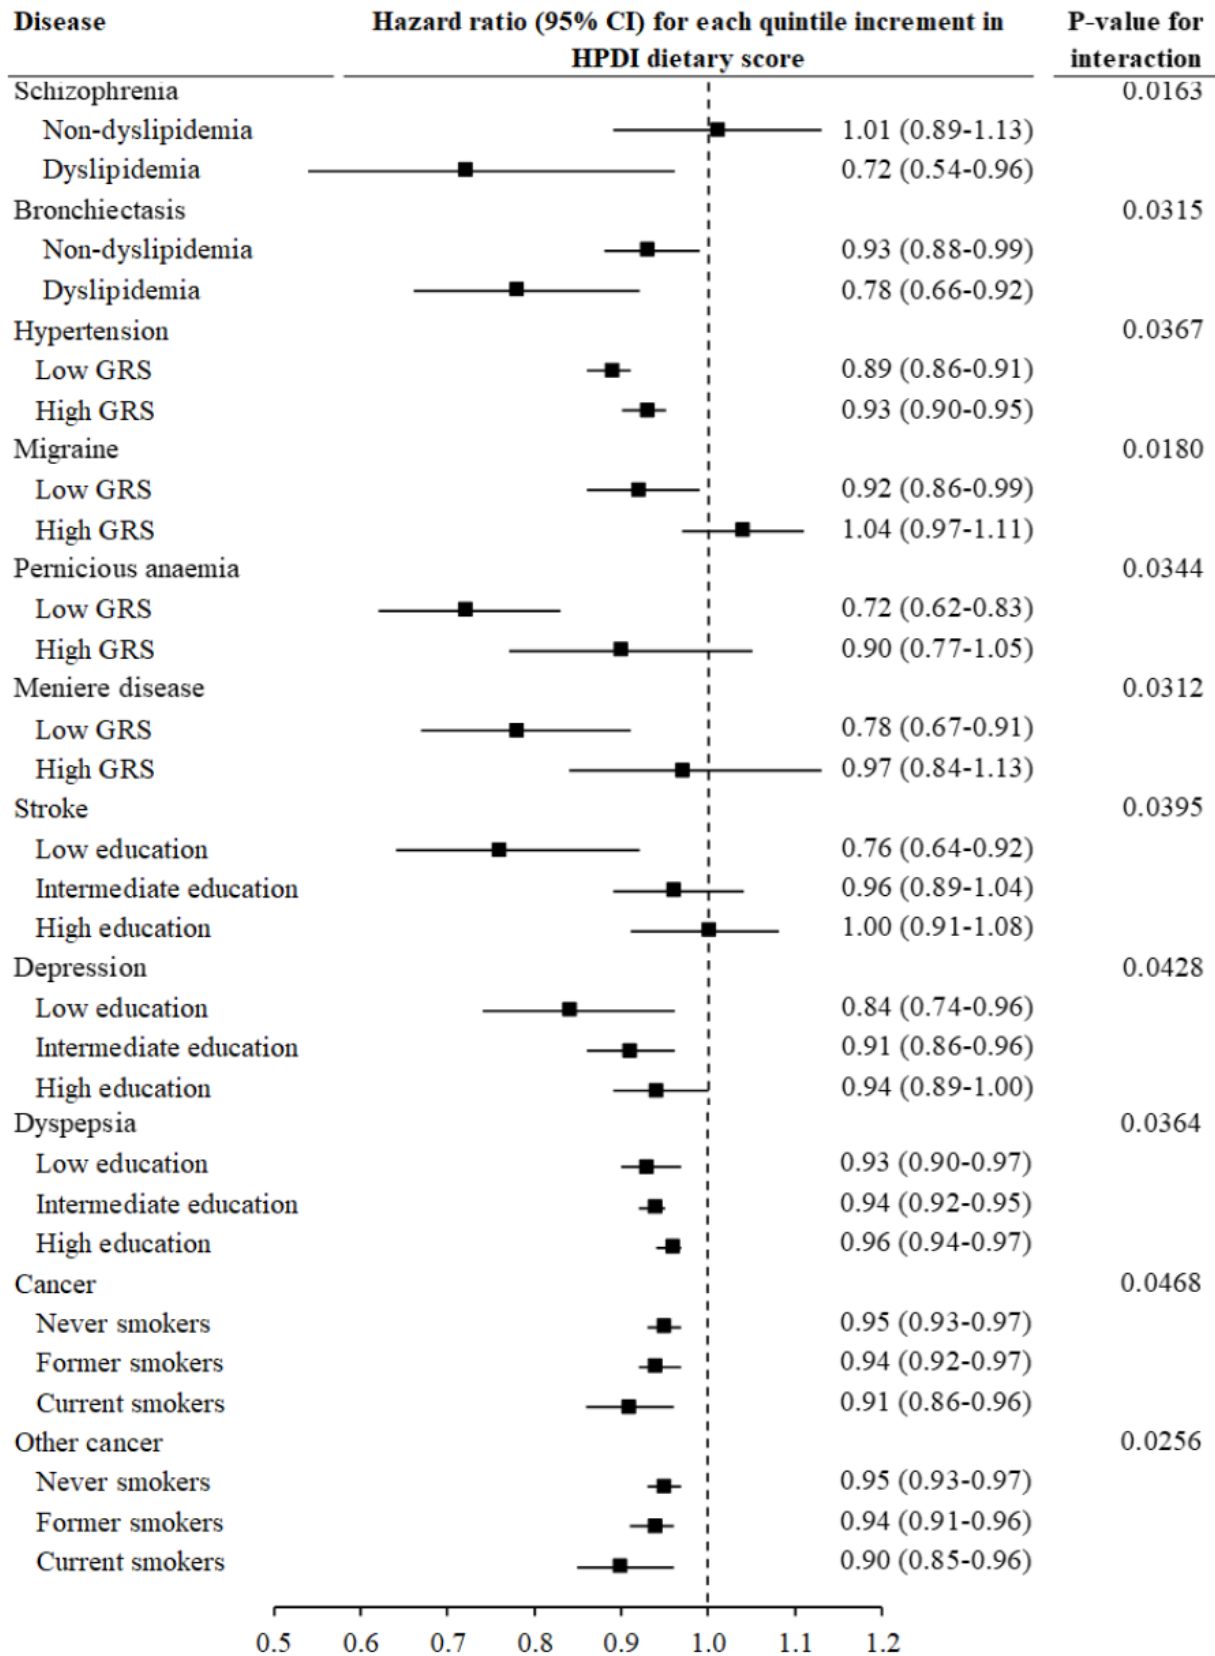



**Figure S4. The association between the Healthful Plant-based Diet Index and the risk of individual chronic diseases moderated by important factors**

BMI, body mass index; CKD, chronic kidney disease; COPD, chronic obstructive pulmonary disease; CVD, cardiovascular disease; GRS, genetic risk score.

Cardiovascular disease includes coronary heart disease, heart failure, atrial fibrillation, other cardiac disease, stroke, and peripheral vascular disease. All cancers encompass any type of cancer except for non-melanoma skin cancer. Cox proportional regression models were used to test whether the association between the Healthful Plant-based Diet Index and the risk of 48 individual chronic diseases was moderated by age, sex, obesity, hypertension, diabetes, dyslipidemia, GRS for longevity, and education. Horizontal lines indicate the range of the 95% confidence interval. The vertical dash lines represent the hazard ratio of 1. Only the results with significant interaction (P-value <0.05) are shown in this figure.

\*Indicates significant interaction while controlling for false discovery rate (FDR), with two-sided statistical tests.

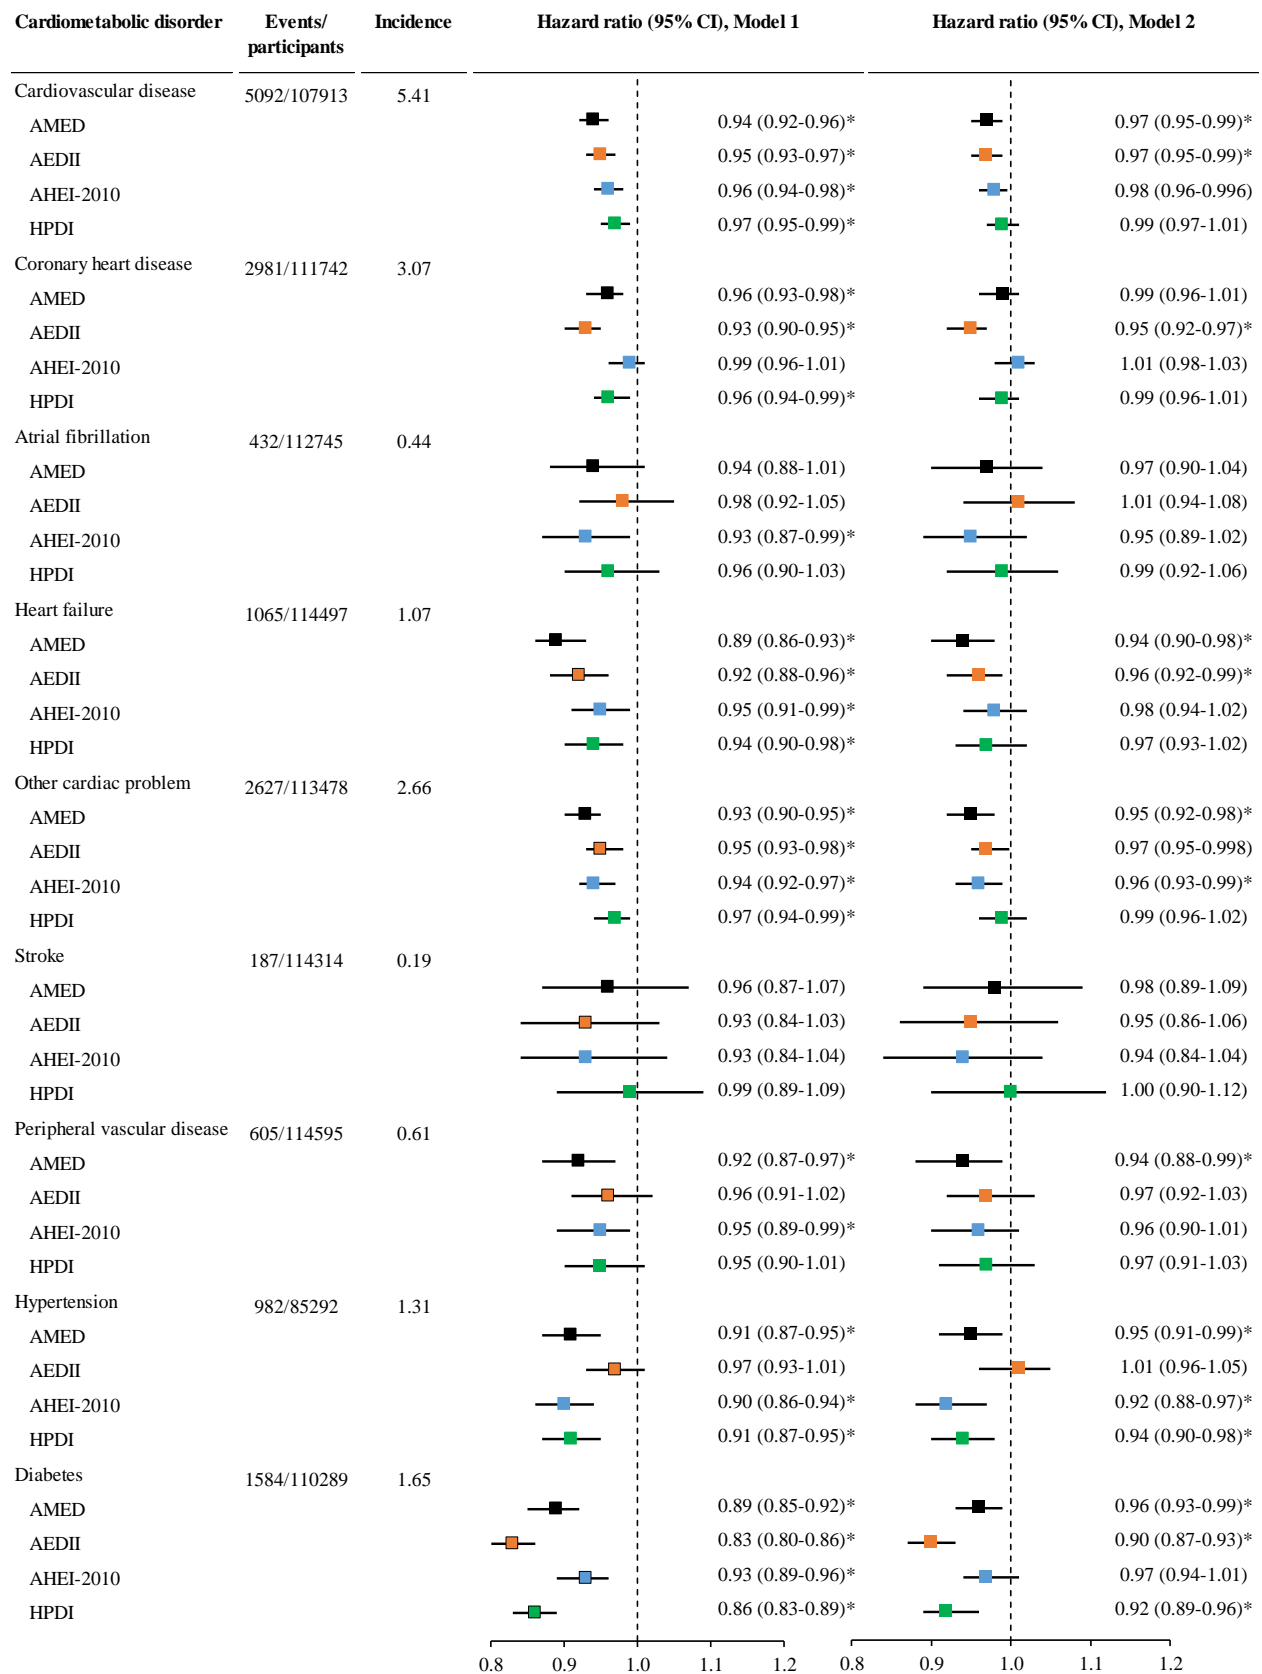

**Figure S5. The association between dietary scores and the risk of cardiometabolic disorders among individuals by excluding those developed the corresponding disease in the first four years of follow-up**

AEDII, Anti-Empirical Dietary Inflammatory Index; AHEI-2010, Alternate Healthy Eating Index-2010; AMED, Alternate Mediterranean Diet score; CI, confidence interval; HPDI, Healthful Plant-based Diet Index.

The incidence refers to the number of event cases per 1000 person-years. Cardiovascular disease includes coronary heart disease, heart failure, atrial fibrillation, other cardiac disease, stroke, and peripheral vascular disease. Cox proportional hazard regression models were used to examine associations of each of the four dietary scores with the risk of individual cardiometabolic disorders adjusted for potential confounding variables. Model 1 was adjusted for age, sex, and total energy intake; Model 2 was adjusted for Model 1 plus ethnicity, education, income, BMI, smoking, sleep, physical activity, and GRS for longevity. Dietary scores were analyzed as continuous variables (each quintile increment). The vertical dash lines represent the hazard ratio of 1. Squares represent the hazard ratios (black color for AMED, orange color for AEDII, blue color for AHEI-2010, and green color for HPDI). Horizontal lines indicate the range of the 95% confidence interval.

\*Indicates a significant association through two-sided statistical tests while controlling for FDR.

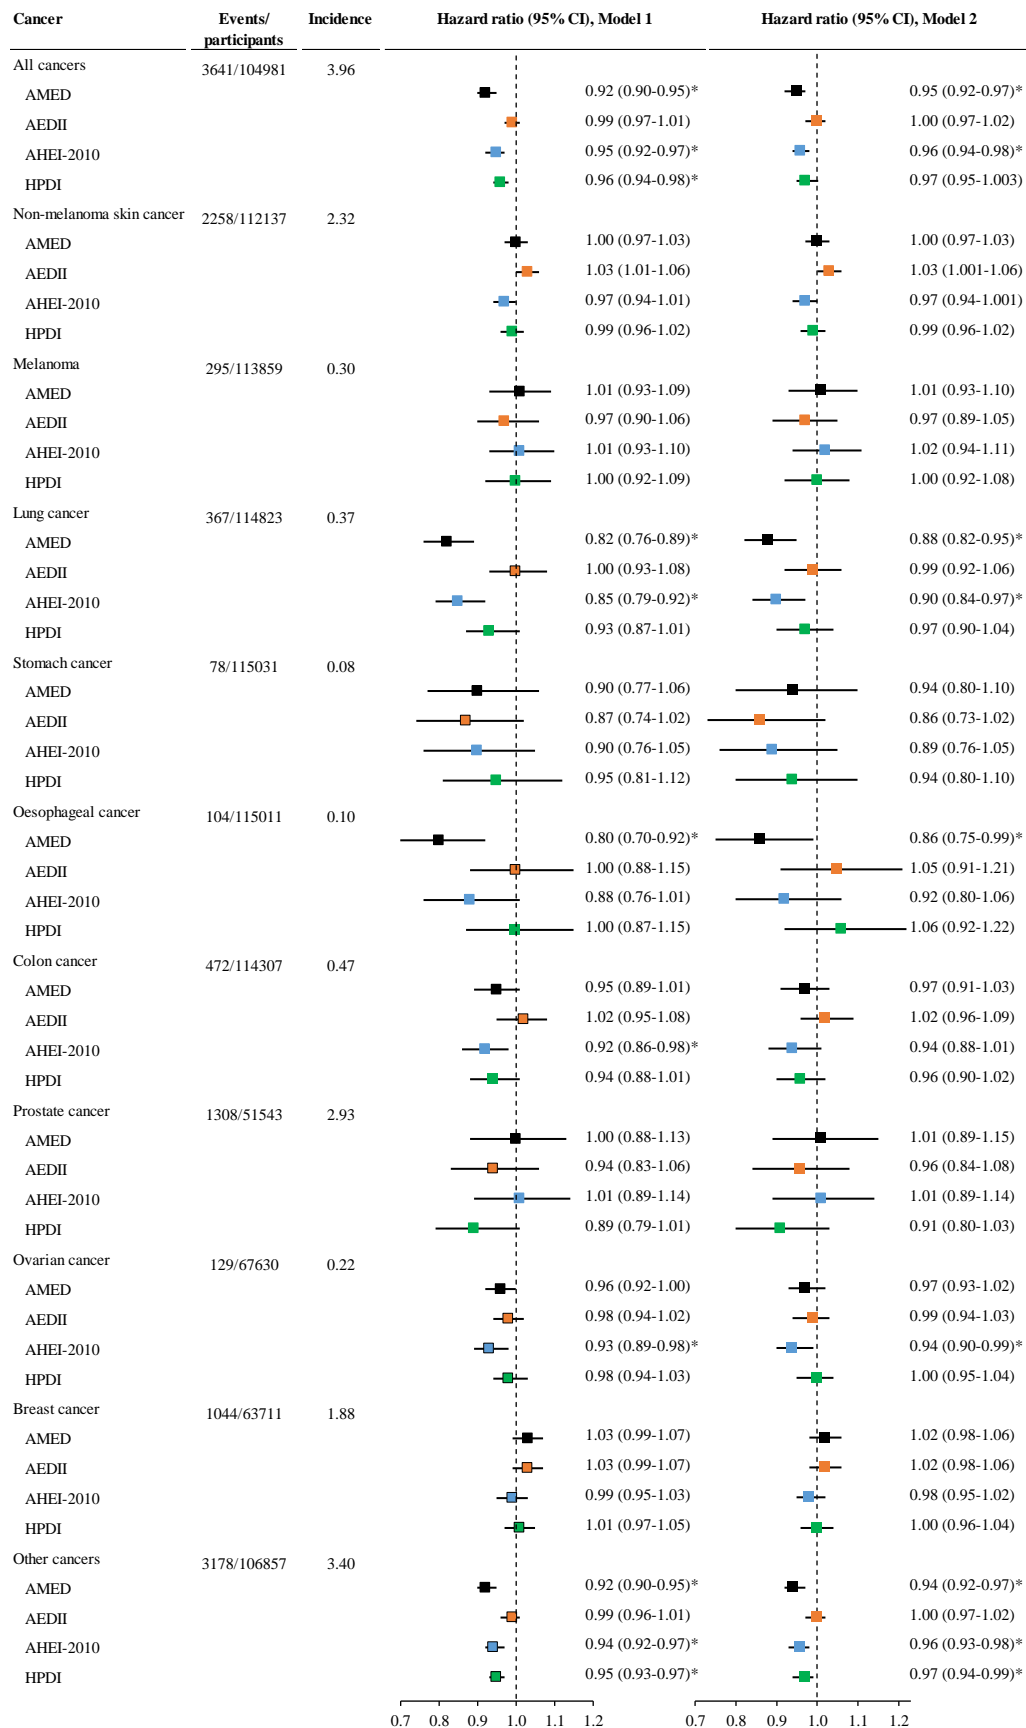

**Figure S6. The association between dietary scores and the risk of all cancers and types of cancers among individuals by excluding those developed the corresponding disease in the first four years of follow-up**

AEDII, Anti-Empirical Dietary Inflammatory Index; AHEI-2010, Alternate Healthy Eating Index-2010; AMED, Alternate Mediterranean Diet score; CI, confidence interval; HPDI, Healthful Plant-based Diet Index.

All cancers encompass any type of cancer except for non-melanoma skin cancer. The incidence refers to the number of event cases per 1000 person-years. Cox proportional hazard regression models were used to examine associations of each of the four dietary scores with the risk of individual cancers. Model 1 was adjusted for age, sex, and total energy intake; Model 2 was adjusted for Model 1 plus ethnicity, education, income, BMI, smoking, sleep, physical activity, and GRS for longevity (pack-years, age stopping smoking, and number of cigarettes currently smoked daily were further adjusted for lung cancer). Dietary scores were analyzed as continuous variables (each quintile increment). The analysis for ovarian cancer and breast cancer was conducted among women only while the analysis for prostate cancer was conducted among men only. The vertical dash lines represent the hazard ratio of 1. Squares represent the hazard ratios (black color for AMED, orange color for AEDII, blue color for AHEI-2010, and green color for HPDI). Horizontal lines indicate the range of the 95% confidence interval.

\*Indicates a significant association through two-sided statistical tests while controlling for FDR.

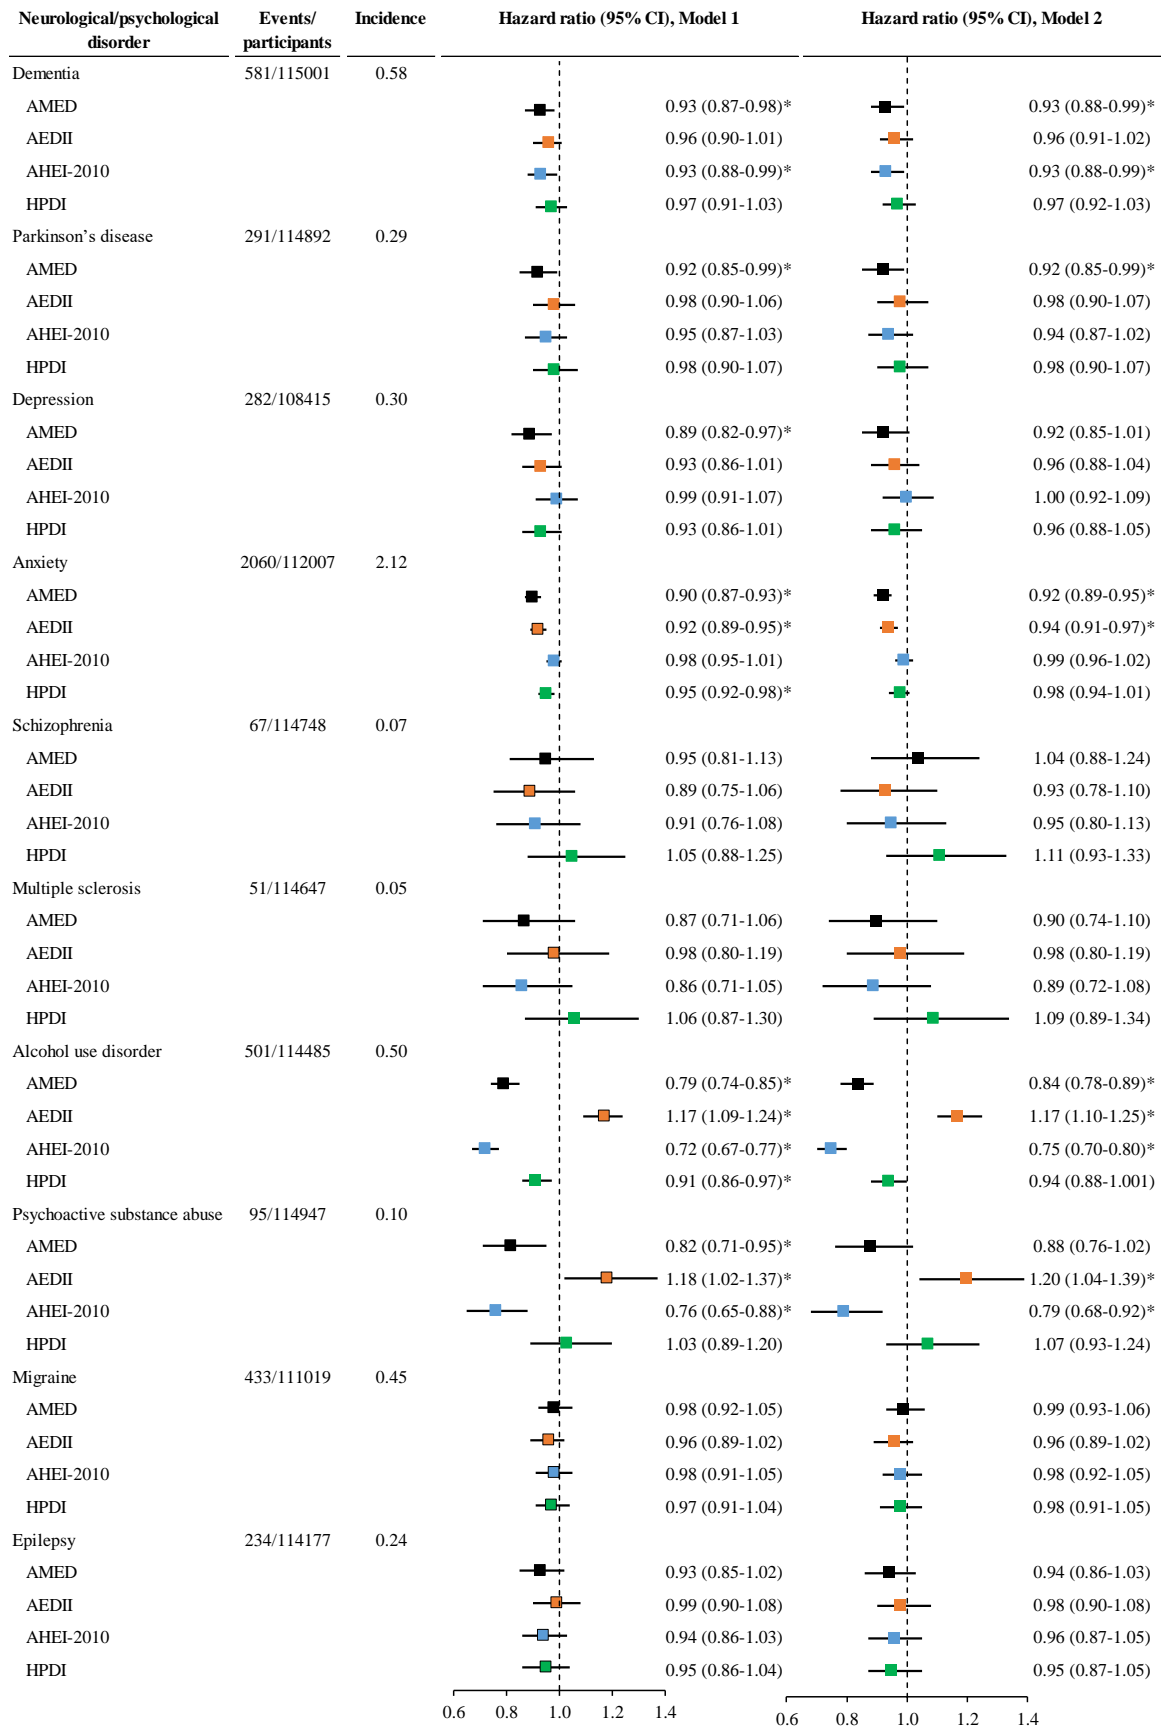

**Figure S7. The association between dietary scores and the risk of neurological and psychological disorders among individuals by excluding those developed the corresponding disease in the first four years of follow-up**

AEDII, Anti-Empirical Dietary Inflammatory Index; AHEI-2010, Alternate Healthy Eating Index-2010; AMED, Alternate Mediterranean Diet score; CI, confidence interval; HPDI, Healthful Plant-based Diet Index.

The incidence refers to the number of event cases per 1000 person-years. Cox proportional hazard regression models were used to examine associations of each of the four dietary scores with the risk of individual neurological/psychological disorders. Model 1 was adjusted for age, sex, and total energy intake; Model 2 was adjusted for Model 1 plus ethnicity, education, income, BMI, smoking, sleep, physical activity, and GRS for longevity. Dietary scores were analyzed as continuous variables (each quintile increment). The vertical dash lines represent the hazard ratio of 1. Squares represent the hazard ratios (black color for AMED, orange color for AEDII, blue color for AHEI-2010, and green color for HPDI). Horizontal lines indicate the range of the 95% confidence interval.

\*Indicates a significant association through two-sided statistical tests while controlling for FDR.

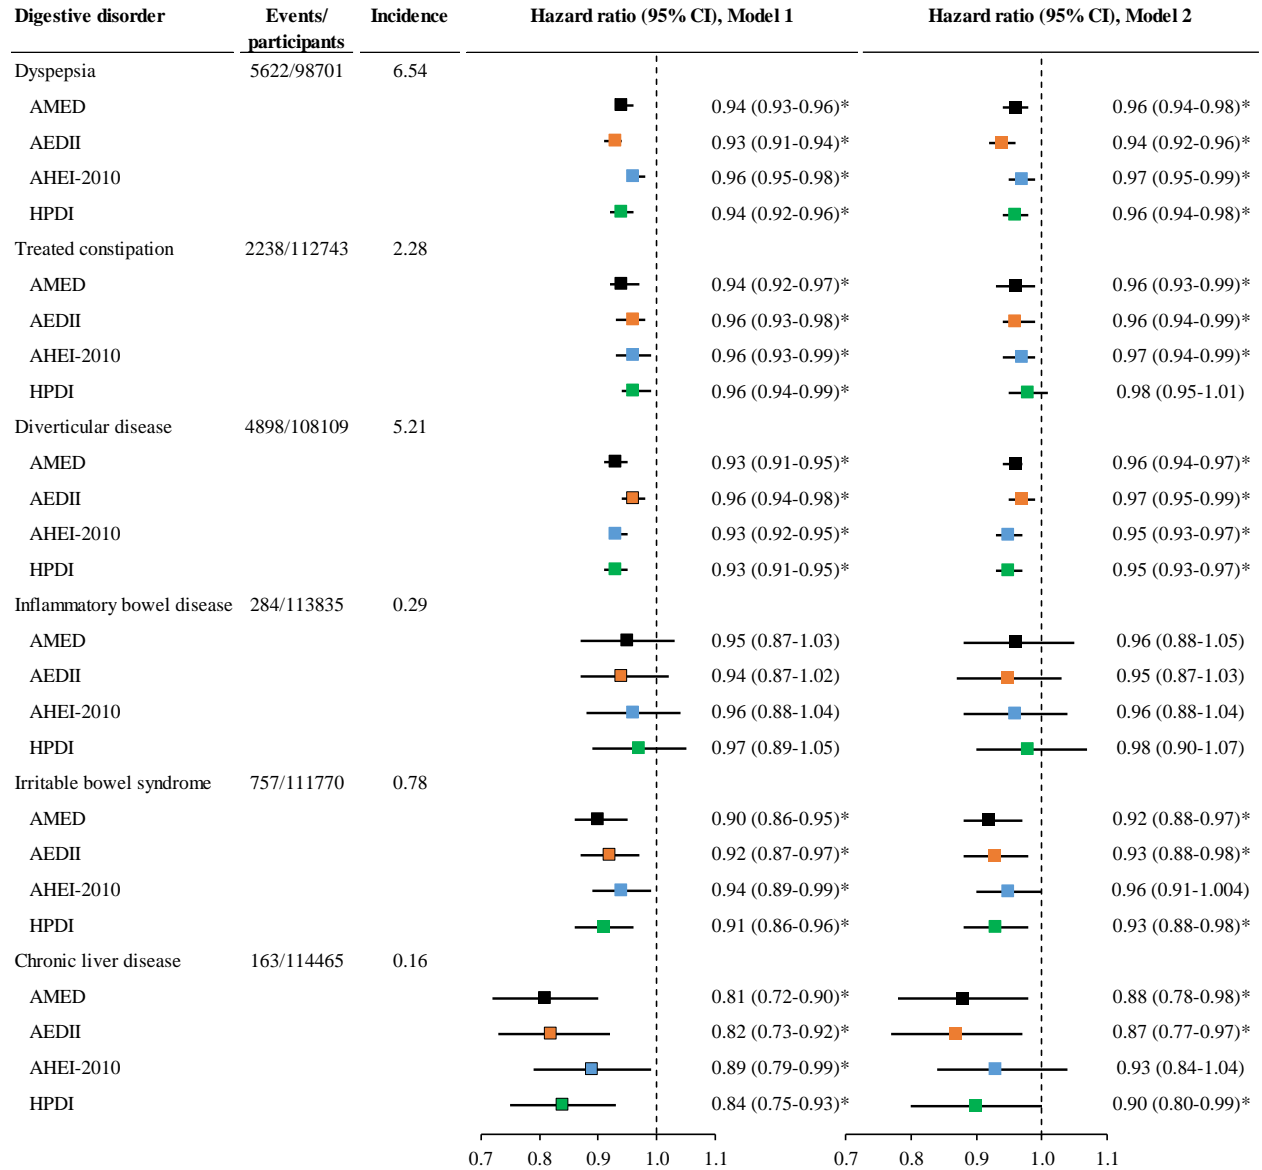



**Figure S8. The association between dietary scores and the risk of digestive disorders among individuals by excluding those developed the corresponding disease in the first four years of follow-up**

AEDII, Anti-Empirical Dietary Inflammatory Index; AHEI-2010, Alternate Healthy Eating Index-2010; AMED, Alternate Mediterranean Diet score; CI, confidence interval; HPDI, Healthful Plant-based Diet Index.

The incidence refers to the number of event cases per 1000 person-years. Cox proportional hazard regression models were used to examine associations of each of the four dietary scores with the risk of individual digestive disorders. Model 1 was adjusted for age, sex, and total energy intake; Model 2 was adjusted for Model 1 plus ethnicity, education, income, BMI, smoking, sleep, physical activity, and GRS for longevity. Dietary scores were analyzed as continuous variables (each quintile increment). The vertical dash lines represent the hazard ratio of 1. Squares represent the hazard ratios (black color for AMED, orange color for AEDII, blue color for AHEI-2010, and green color for HPDI). Horizontal lines indicate the range of the 95% confidence interval.

\*Indicates a significant association through two-sided statistical tests while controlling for FDR.

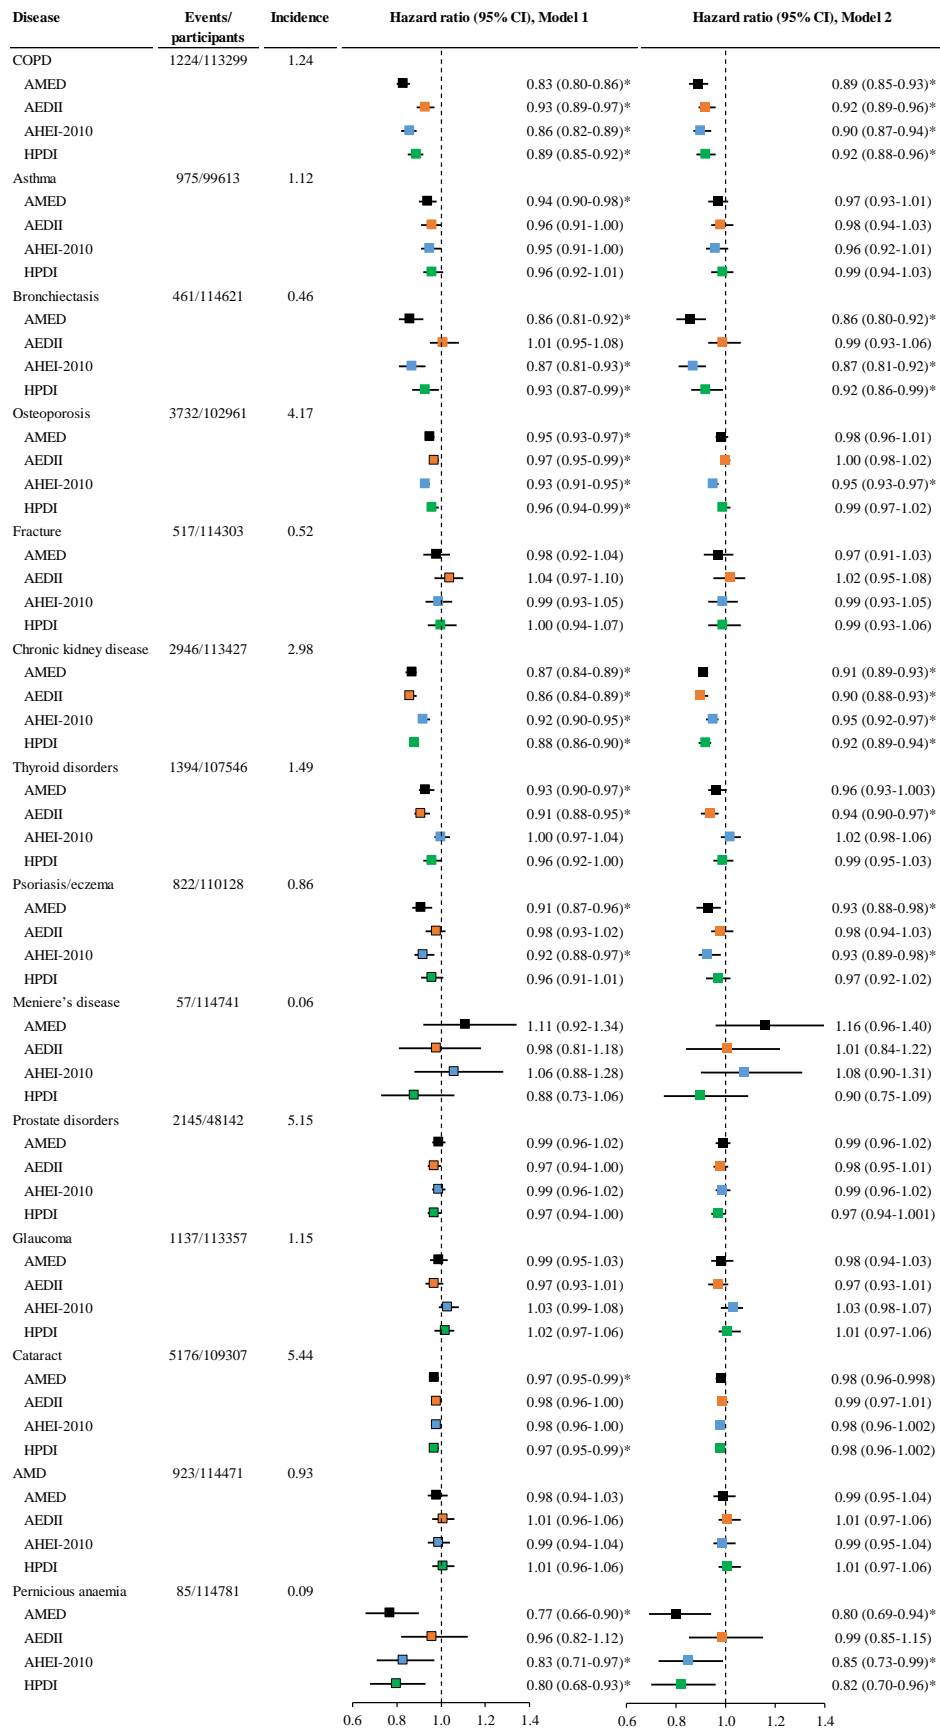

**Figure S9. The association between dietary scores and the risk of other chronic diseases among individuals by excluding those developed the corresponding disease in the first four years of follow-up**

AEDII, Anti-Empirical Dietary Inflammatory Index; AHEI-2010, Alternate Healthy Eating Index-2010; AMED, Alternate Mediterranean Diet score; AMD, age related macular degeneration; CI, confidence interval; COPD, chronic obstructive pulmonary disease; HPDI, Healthful Plant-based Diet Index.

The incidence refers to the number of event cases per 1000 person-years. Cox proportional hazard regression models were used to examine associations of each of the four dietary scores with the risk of individual other chronic diseases. Model 1 was adjusted for age, sex, and total energy intake; Model 2 was adjusted for Model 1 plus ethnicity, education, income, BMI, smoking, sleep, physical activity, and GRS for longevity. Dietary scores were analyzed as continuous variables (each quintile increment). The analysis for prostate disorders was conducted among men only. The vertical dash lines represent the hazard ratio of 1. Squares represent the hazard ratios (black color for AMED, orange color for AEDII, blue color for AHEI-2010, and green color for HPDI). Horizontal lines indicate the range of the 95% confidence interval.

\*Indicates a significant association through two-sided statistical tests while controlling for FDR.

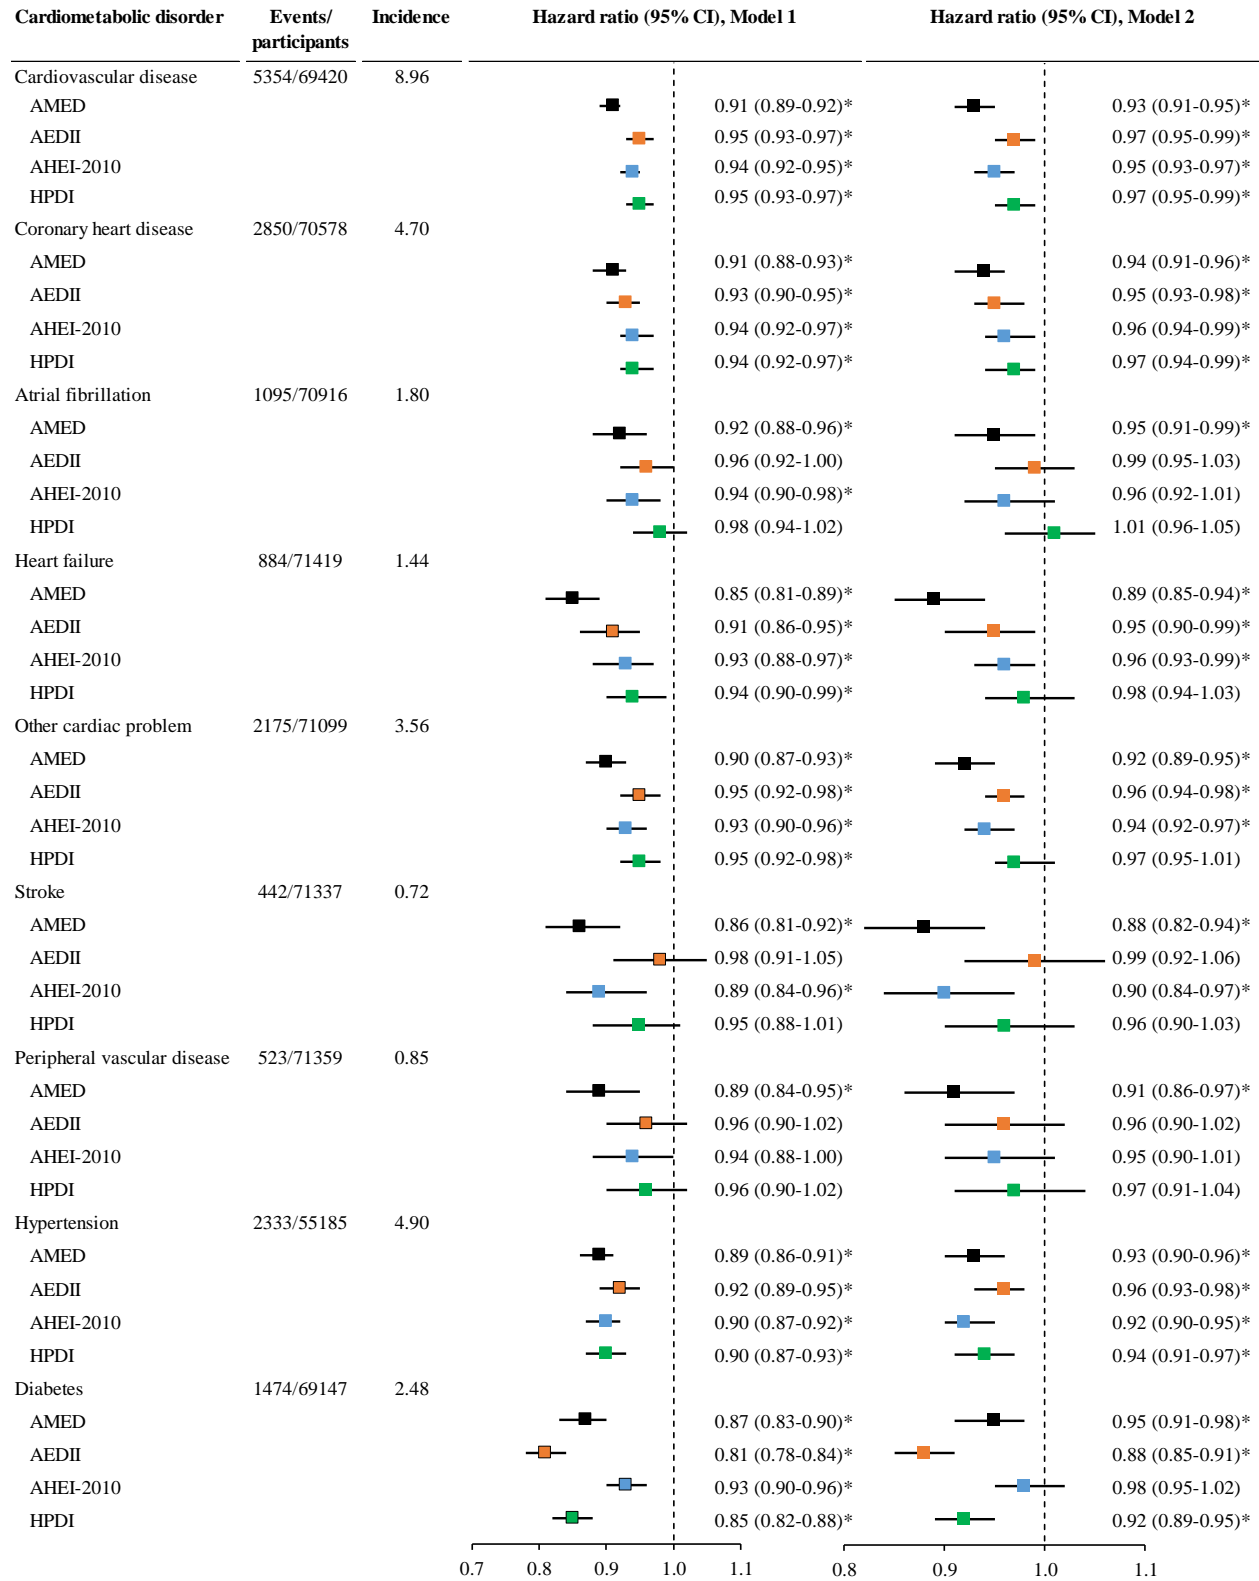

**Figure S10. The association between dietary scores and the risk of cardiometabolic disorders among individuals with three or more dietary assessments**

AEDII, Anti-Empirical Dietary Inflammatory Index; AHEI-2010, Alternate Healthy Eating Index-2010; AMED, Alternate Mediterranean Diet score; CI, confidence interval; HPDI, Healthful Plant-based Diet Index.

The incidence refers to the number of event cases per 1000 person-years. Cardiovascular disease includes coronary heart disease, heart failure, atrial fibrillation, other cardiac disease, stroke, and peripheral vascular disease. Cox proportional hazard regression models were used to examine associations of each of the four dietary scores with the risk of individual cardiometabolic disorders adjusted for potential confounding variables. Model 1 was adjusted for age, sex, and total energy intake; Model 2 was adjusted for Model 1 plus ethnicity, education, income, BMI, smoking, sleep, physical activity, and GRS for longevity. Dietary scores were analyzed as continuous variables (each quintile increment). The vertical dash lines represent the hazard ratio of 1. Squares represent the hazard ratios (black color for AMED, orange color for AEDII, blue color for AHEI-2010, and green color for HPDI). Horizontal lines indicate the range of the 95% confidence interval.

\*Indicates a significant association through two-sided statistical tests while controlling for FDR.

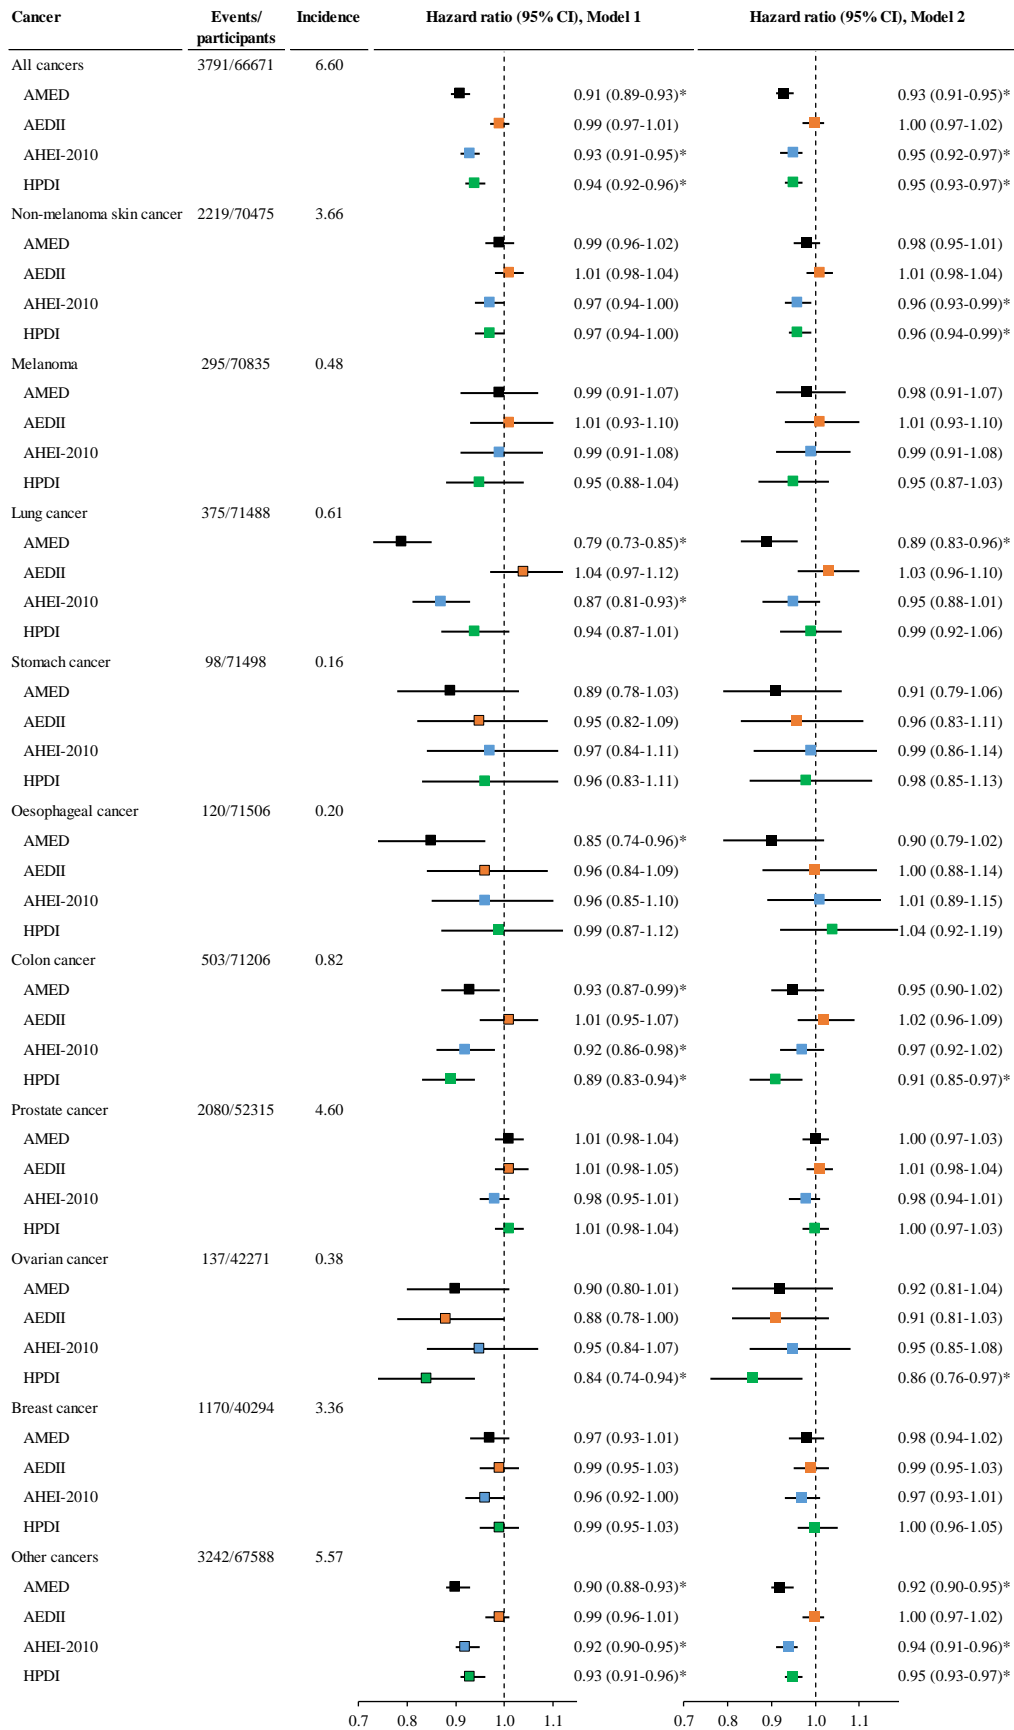

**Figure S11. The association between dietary scores and the risk of all cancers and types of cancers among individuals with three or more dietary assessments**

AEDII, Anti-Empirical Dietary Inflammatory Index; AHEI-2010, Alternate Healthy Eating Index-2010; AMED, Alternate Mediterranean Diet score; CI, confidence interval; HPDI, Healthful Plant-based Diet Index.

The incidence refers to the number of event cases per 1000 person-years. All cancers encompass any type of cancer except for non-melanoma skin cancer. Cox proportional hazard regression models were used to examine associations of each of the four dietary scores with the risk of individual cancers. Model 1 was adjusted for age, sex, and total energy intake; Model 2 was adjusted for Model 1 plus ethnicity, education, income, BMI, smoking, sleep, physical activity, and GRS for longevity (pack-years, age stopping smoking, and number of cigarettes currently smoked daily were further adjusted for lung cancer). Dietary scores were analyzed as continuous variables (each quintile increment). The analysis for ovarian cancer and breast cancer was conducted among women only while the analysis for prostate cancer was conducted among men only. The vertical dash lines represent the hazard ratio of 1. Squares represent the hazard ratios (black color for AMED, orange color for AEDII, blue color for AHEI-2010, and green color for HPDI). Horizontal lines indicate the range of the 95% confidence interval.

\*Indicates a significant association through two-sided statistical tests while controlling for FDR.

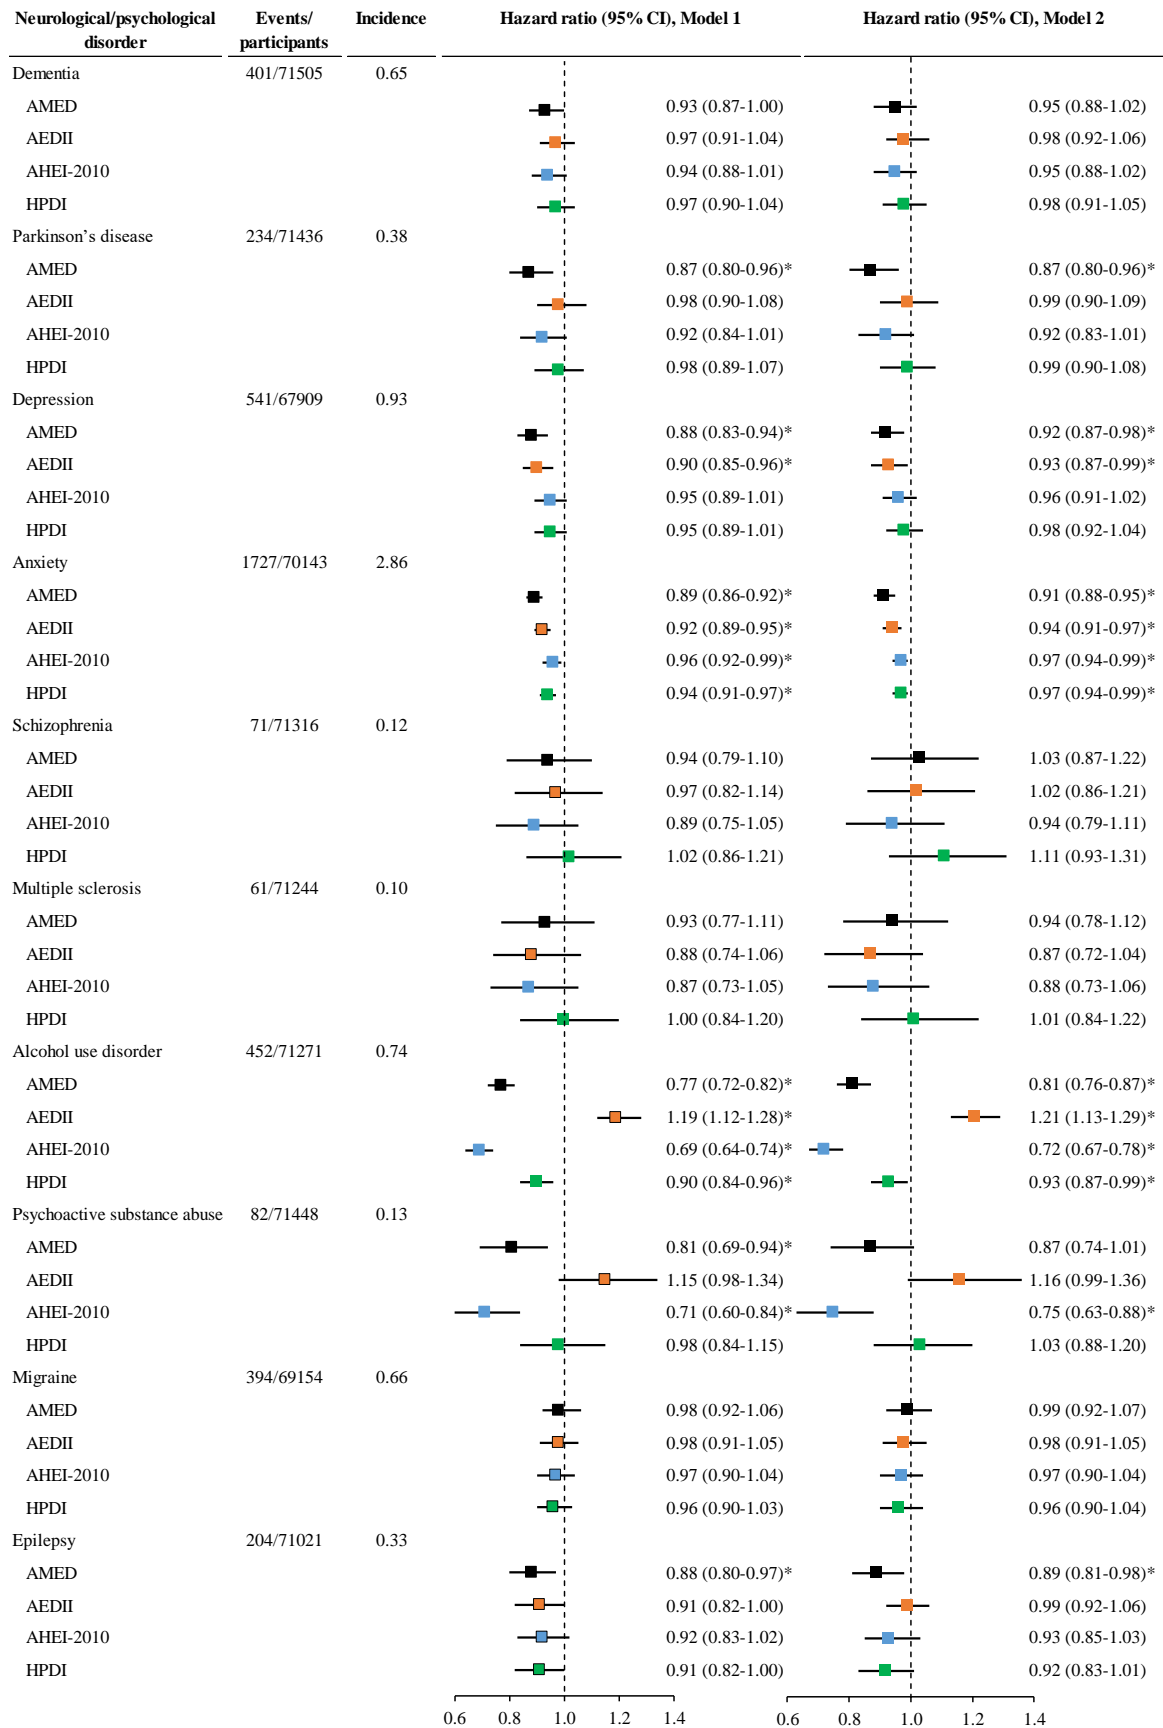



**Figure S12. The association between dietary scores and the risk of neurological and psychological disorders among individuals with three or more dietary assessments**

AEDII, Anti-Empirical Dietary Inflammatory Index; AHEI-2010, Alternate Healthy Eating Index-2010; AMED, Alternate Mediterranean Diet score; CI, confidence interval; HPDI, Healthful Plant-based Diet Index.

The incidence refers to the number of event cases per 1000 person-years. Cox proportional hazard regression models were used to examine associations of each of the four dietary scores with the risk of individual neurological/psychological disorders. Model 1 was adjusted for age, sex, and total energy intake; Model 2 was adjusted for Model 1 plus ethnicity, education, income, BMI, smoking, sleep, physical activity, and GRS for longevity. Dietary scores were analyzed as continuous variables (each quintile increment). The vertical dash lines represent the hazard ratio of 1. Squares represent the hazard ratios (black color for AMED, orange color for AEDII, blue color for AHEI-2010, and green color for HPDI). Horizontal lines indicate the range of the 95% confidence interval.

\*Indicates a significant association through two-sided statistical tests while controlling for FDR.

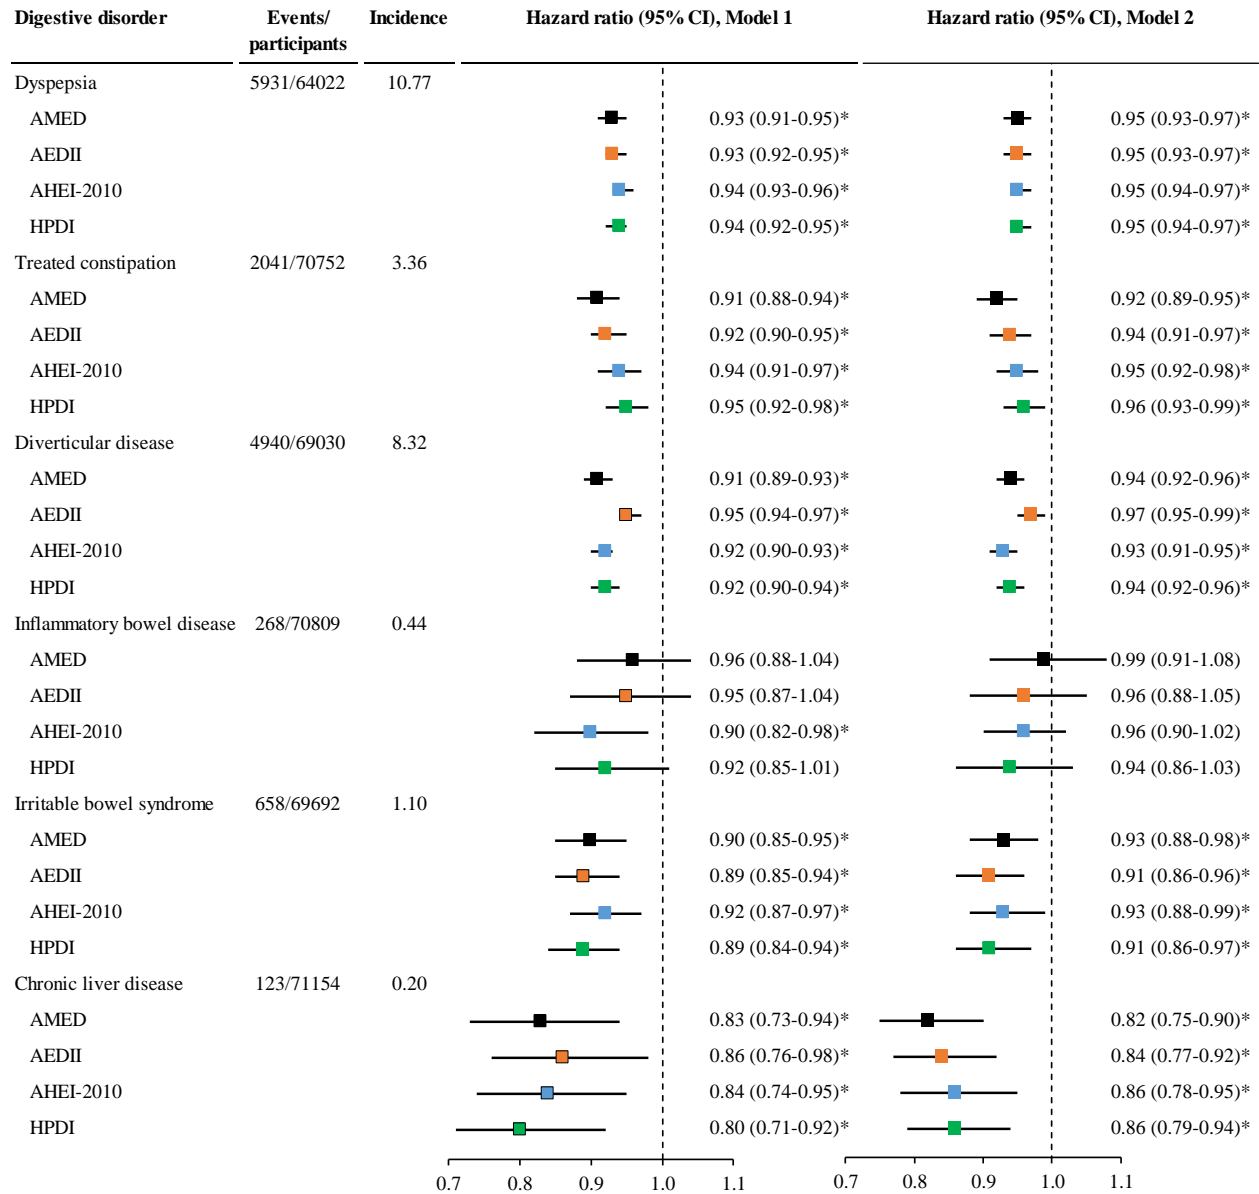

**Figure S13. The association between dietary scores and the risk of digestive disorders among individuals with three or more dietary assessments**

AEDII, Anti-Empirical Dietary Inflammatory Index; AHEI-2010, Alternate Healthy Eating Index-2010; AMED, Alternate Mediterranean Diet score; CI, confidence interval; HPDI, Healthful Plant-based Diet Index.

The incidence refers to the number of event cases per 1000 person-years. Cox proportional hazard regression models were used to examine associations of each of the four dietary scores with the risk of individual digestive disorders. Model 1 was adjusted for age, sex, and total energy intake; Model 2 was adjusted for Model 1 plus ethnicity, education, income, BMI, smoking, sleep, physical activity, and GRS for longevity. Dietary scores were analyzed as continuous variables (each quintile increment). The vertical dash lines represent the hazard ratio of 1. Squares represent the hazard ratios (black color for AMED, orange color for AEDII, blue color for AHEI-2010, and green color for HPDI). Horizontal lines indicate the range of the 95% confidence interval.

\*Indicates a significant association through two-sided statistical tests while controlling for FDR.

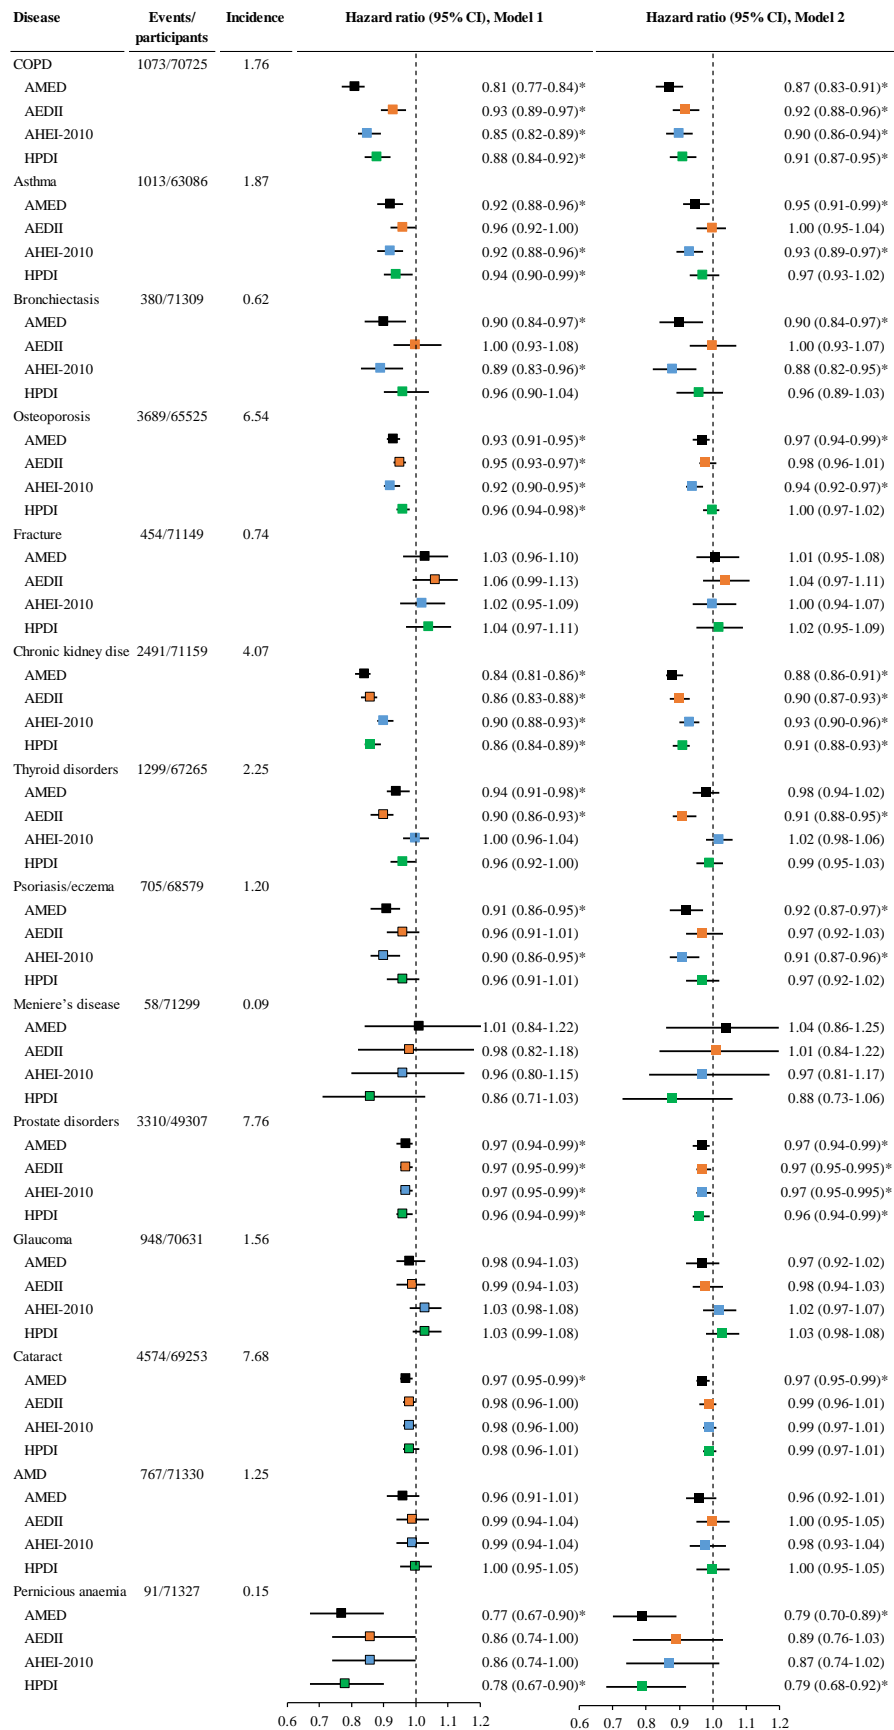

**Figure S14. The association between dietary scores and the risk of other chronic diseases among individuals with three or more dietary assessments**

AEDII, Anti-Empirical Dietary Inflammatory Index; AHEI-2010, Alternate Healthy Eating Index-2010; AMED, Alternate Mediterranean Diet score; AMD, age related macular degeneration; CI, confidence interval; COPD, chronic obstructive pulmonary disease; HPDI, Healthful Plant-based Diet Index.

The incidence refers to the number of event cases per 1000 person-years. Cox proportional hazard regression models were used to examine associations of each of the four dietary scores with the risk of individual other chronic diseases. Model 1 was adjusted for age, sex, and total energy intake; Model 2 was adjusted for Model 1 plus ethnicity, education, income, BMI, smoking, sleep, physical activity, and GRS for longevity. Dietary scores were analyzed as continuous variables (each quintile increment). The analysis for prostate disorders was conducted among men only. The vertical dash lines represent the hazard ratio of 1. Squares represent the hazard ratios (black color for AMED, orange color for AEDII, blue color for AHEI-2010, and green color for HPDI). Horizontal lines indicate the range of the 95% confidence interval.

\*Indicates a significant association through two-sided statistical tests while controlling for FDR.

**Table S1. The association between the Alternate Mediterranean Diet Index and the incidence of individual chronic diseases**

|                                           | Alternate Mediterranean Diet Index |                  |                  |                  |                  | P-value<br>for trend* |
|-------------------------------------------|------------------------------------|------------------|------------------|------------------|------------------|-----------------------|
|                                           | Quintile 1                         | Quintile 2       | Quintile 3       | Quintile 4       | Quintile 5       |                       |
| <b>Cardiovascular disease<sup>†</sup></b> |                                    |                  |                  |                  |                  |                       |
| Events                                    | 1934                               | 1735             | 1856             | 1535             | 1865             |                       |
| Person-years                              | 179474                             | 174641           | 202785           | 183701           | 231642           |                       |
| HR (95% CI), Model 1                      | Reference                          | 0.90 (0.84-0.96) | 0.81 (0.76-0.86) | 0.74 (0.70-0.80) | 0.71 (0.66-0.75) | <0.0001               |
| HR (95% CI), Model 2                      | Reference                          | 0.92 (0.87-0.99) | 0.85 (0.79-0.90) | 0.80 (0.75-0.86) | 0.79 (0.74-0.84) | <0.0001               |
| <b>Coronary heart disease</b>             |                                    |                  |                  |                  |                  |                       |
| Events                                    | 1081                               | 953              | 983              | 839              | 964              |                       |
| Person-years                              | 182900                             | 177386           | 205885           | 186333           | 235142           |                       |
| HR (95% CI), Model 1                      | Reference                          | 0.90 (0.83-0.98) | 0.79 (0.73-0.87) | 0.77 (0.70-0.84) | 0.70 (0.64-0.77) | <0.0001               |
| HR (95% CI), Model 2                      | Reference                          | 0.93 (0.86-1.02) | 0.84 (0.77-0.91) | 0.84 (0.76-0.92) | 0.80 (0.73-0.87) | <0.0001               |
| <b>Heart failure</b>                      |                                    |                  |                  |                  |                  |                       |
| Events                                    | 353                                | 313              | 312              | 276              | 264              |                       |
| Person-years                              | 185511                             | 179575           | 208224           | 188405           | 237489           |                       |
| HR (95% CI), Model 1                      | Reference                          | 0.89 (0.76-1.03) | 0.75 (0.64-0.87) | 0.73 (0.63-0.86) | 0.55 (0.46-0.64) | <0.0001               |
| HR (95% CI), Model 2                      | Reference                          | 0.94 (0.80-1.09) | 0.81 (0.70-0.95) | 0.83 (0.71-0.98) | 0.67 (0.56-0.79) | <0.0001               |
| <b>Atrial fibrillation</b>                |                                    |                  |                  |                  |                  |                       |
| Events                                    | 397                                | 370              | 357              | 327              | 380              |                       |
| Person-years                              | 184263                             | 178338           | 206738           | 187117           | 235985           |                       |
| HR (95% CI), Model 1                      | Reference                          | 0.94 (0.81-1.08) | 0.77 (0.66-0.88) | 0.79 (0.68-0.91) | 0.71 (0.62-0.82) | <0.0001               |
| HR (95% CI), Model 2                      | Reference                          | 0.97 (0.84-1.12) | 0.81 (0.70-0.93) | 0.85 (0.74-0.99) | 0.82 (0.71-0.95) | 0.0066                |
| <b>Other cardiac disease</b>              |                                    |                  |                  |                  |                  |                       |
| Events                                    | 795                                | 718              | 749              | 586              | 738              |                       |
| Person-years                              | 184656                             | 178669           | 207371           | 187654           | 236523           |                       |
| HR (95% CI), Model 1                      | Reference                          | 0.91 (0.82-1.01) | 0.80 (0.72-0.88) | 0.69 (0.62-0.77) | 0.68 (0.62-0.76) | <0.0001               |
| HR (95% CI), Model 2                      | Reference                          | 0.94 (0.85-1.04) | 0.85 (0.76-0.93) | 0.75 (0.67-0.84) | 0.77 (0.69-0.85) | <0.0001               |
| <b>Stroke</b>                             |                                    |                  |                  |                  |                  |                       |
| Events                                    | 166                                | 135              | 161              | 129              | 128              |                       |
| Person-years                              | 185253                             | 179349           | 208137           | 188232           | 237353           |                       |
| HR (95% CI), Model 1                      | Reference                          | 0.81 (0.65-1.02) | 0.82 (0.66-1.02) | 0.72 (0.57-0.91) | 0.56 (0.44-0.70) | <0.0001               |
| HR (95% CI), Model 2                      | Reference                          | 0.84 (0.67-1.05) | 0.85 (0.68-1.06) | 0.76 (0.61-0.97) | 0.60 (0.47-0.76) | 0.0010                |
| <b>Peripheral vascular disease</b>        |                                    |                  |                  |                  |                  |                       |
| Events                                    | 194                                | 174              | 184              | 138              | 180              |                       |
| Person-years                              | 185270                             | 179427           | 208177           | 188277           | 237277           |                       |
| HR (95% CI), Model 1                      | Reference                          | 0.90 (0.74-1.11) | 0.81 (0.66-0.99) | 0.67 (0.54-0.83) | 0.68 (0.55-0.84) | 0.0004                |
| HR (95% CI), Model 2                      | Reference                          | 0.94 (0.76-1.15) | 0.85 (0.70-1.05) | 0.72 (0.57-0.89) | 0.75 (0.60-0.92) | 0.0115                |
| <b>Hypertension</b>                       |                                    |                  |                  |                  |                  |                       |
| Events                                    | 875                                | 718              | 829              | 659              | 801              |                       |
| Person-years                              | 140746                             | 136975           | 160561           | 147647           | 189005           |                       |
| HR (95% CI), Model 1                      | Reference                          | 0.82 (0.74-0.91) | 0.79 (0.72-0.87) | 0.68 (0.61-0.75) | 0.63 (0.57-0.69) | <0.0001               |
| HR (95% CI), Model 2                      | Reference                          | 0.86 (0.78-0.95) | 0.86 (0.78-0.94) | 0.77 (0.70-0.85) | 0.77 (0.69-0.85) | <0.0001               |

|                             |           |                  |                  |                  |                  |         |
|-----------------------------|-----------|------------------|------------------|------------------|------------------|---------|
| Diabetes                    |           |                  |                  |                  |                  |         |
| Events                      | 575       | 530              | 503              | 396              | 447              |         |
| Person-years                | 178251    | 172903           | 201465           | 182669           | 231597           |         |
| HR (95% CI), Model 1        | Reference | 0.95 (0.84-1.07) | 0.77 (0.68-0.87) | 0.68 (0.59-0.77) | 0.60 (0.53-0.68) | <0.0001 |
| HR (95% CI), Model 2        | Reference | 1.07 (0.95-1.21) | 0.91 (0.80-1.02) | 0.87 (0.77-0.99) | 0.89 (0.78-1.01) | 0.0047  |
| All cancers <sup>‡</sup>    |           |                  |                  |                  |                  |         |
| Events                      | 1308      | 1166             | 1251             | 1040             | 1284             |         |
| Person-years                | 173558    | 168083           | 195731           | 176159           | 222541           |         |
| HR (95% CI), Model 1        | Reference | 0.89 (0.82-0.96) | 0.79 (0.73-0.86) | 0.72 (0.67-0.79) | 0.69 (0.64-0.75) | <0.0001 |
| HR (95% CI), Model 2        | Reference | 0.91 (0.84-0.99) | 0.83 (0.76-0.89) | 0.77 (0.71-0.84) | 0.76 (0.70-0.82) | <0.0001 |
| Non-melanoma skin cancer    |           |                  |                  |                  |                  |         |
| Events                      | 674       | 628              | 724              | 659              | 874              |         |
| Person-years                | 183425    | 177283           | 205619           | 185858           | 234092           |         |
| HR (95% CI), Model 1        | Reference | 0.94 (0.84-1.05) | 0.91 (0.82-1.02) | 0.92 (0.83-1.03) | 0.96 (0.86-1.06) | 0.49    |
| HR (95% CI), Model 2        | Reference | 0.92 (0.83-1.03) | 0.89 (0.80-0.99) | 0.90 (0.80-1.00) | 0.92 (0.82-1.02) | 0.25    |
| Melanoma                    |           |                  |                  |                  |                  |         |
| Events                      | 87        | 89               | 99               | 84               | 126              |         |
| Person-years                | 184493    | 178156           | 206726           | 186569           | 235490           |         |
| HR (95% CI), Model 1        | Reference | 1.04 (0.77-1.40) | 0.98 (0.73-1.31) | 0.92 (0.68-1.24) | 1.07 (0.81-1.41) | 0.85    |
| HR (95% CI), Model 2        | Reference | 1.04 (0.77-1.39) | 0.97 (0.73-1.30) | 0.91 (0.67-1.24) | 1.07 (0.81-1.42) | 0.84    |
| Lung cancer                 |           |                  |                  |                  |                  |         |
| Events                      | 176       | 131              | 101              | 90               | 111              |         |
| Person-years                | 185751    | 179747           | 208583           | 188563           | 237723           |         |
| HR (95% CI), Model 1        | Reference | 0.73 (0.58-0.91) | 0.46 (0.36-0.59) | 0.45 (0.35-0.58) | 0.42 (0.33-0.53) | <0.0001 |
| HR (95% CI), Model 2        | Reference | 0.80 (0.64-1.00) | 0.53 (0.42-0.68) | 0.53 (0.41-0.69) | 0.53 (0.42-0.68) | <0.0001 |
| Stomach cancer              |           |                  |                  |                  |                  |         |
| Events                      | 32        | 34               | 28               | 24               | 27               |         |
| Person-years                | 185774    | 179753           | 208573           | 188611           | 237718           |         |
| HR (95% CI), Model 1        | Reference | 1.09 (0.67-1.77) | 0.78 (0.47-1.29) | 0.75 (0.44-1.29) | 0.68 (0.40-1.14) | 0.31    |
| HR (95% CI), Model 2        | Reference | 1.14 (0.71-1.86) | 0.83 (0.50-1.38) | 0.83 (0.49-1.43) | 0.80 (0.47-1.35) | 0.59    |
| Oesophageal cancer          |           |                  |                  |                  |                  |         |
| Events                      | 54        | 47               | 29               | 30               | 34               |         |
| Person-years                | 185772    | 179754           | 208567           | 188618           | 237786           |         |
| HR (95% CI), Model 1        | Reference | 0.88 (0.60-1.31) | 0.46 (0.29-0.73) | 0.54 (0.34-0.84) | 0.48 (0.31-0.74) | 0.0004  |
| HR (95% CI), Model 2        | Reference | 0.96 (0.65-1.42) | 0.52 (0.33-0.82) | 0.64 (0.41-1.00) | 0.62 (0.40-0.97) | 0.0159  |
| Colon cancer                |           |                  |                  |                  |                  |         |
| Events                      | 163       | 149              | 149              | 155              | 165              |         |
| Person-years                | 184901    | 179007           | 207830           | 187890           | 236939           |         |
| HR (95% CI), Model 1        | Reference | 0.92 (0.73-1.15) | 0.77 (0.62-0.97) | 0.89 (0.71-1.11) | 0.73 (0.59-0.91) | 0.0379  |
| HR (95% CI), Model 2        | Reference | 0.94 (0.75-1.18) | 0.80 (0.64-1.01) | 0.94 (0.75-1.18) | 0.81 (0.64-1.01) | 0.19    |
| Ovarian cancer <sup>§</sup> |           |                  |                  |                  |                  |         |
| Events                      | 42        | 33               | 50               | 47               | 49               |         |
| Person-years                | 94169     | 98811            | 121726           | 117613           | 157791           |         |
| HR (95% CI), Model 1        | Reference | 0.72 (0.46-1.14) | 0.86 (0.57-1.30) | 0.82 (0.54-1.24) | 0.61 (0.40-0.93) | 0.19    |

|                                     |           |                  |                  |                  |                  |         |
|-------------------------------------|-----------|------------------|------------------|------------------|------------------|---------|
| HR (95% CI), Model 2                | Reference | 0.74 (0.47-1.16) | 0.89 (0.59-1.35) | 0.85 (0.56-1.30) | 0.66 (0.43-1.00) | 0.32    |
| <b>Breast cancer<sup>s</sup></b>    |           |                  |                  |                  |                  |         |
| Events                              | 346       | 316              | 383              | 375              | 486              |         |
| Person-years                        | 90043     | 94302            | 116620           | 112496           | 150030           |         |
| HR (95% CI), Model 1                | Reference | 0.86 (0.74-1.00) | 0.84 (0.72-0.97) | 0.84 (0.73-0.98) | 0.81 (0.70-0.93) | 0.0367  |
| HR (95% CI), Model 2                | Reference | 0.88 (0.75-1.02) | 0.86 (0.75-1.00) | 0.88 (0.76-1.02) | 0.86 (0.74-0.99) | 0.23    |
| <b>Prostate cancer<sup>¶</sup></b>  |           |                  |                  |                  |                  |         |
| Events                              | 406       | 413              | 444              | 392              | 425              |         |
| Person-years                        | 101367    | 88578            | 95657            | 78618            | 87976            |         |
| HR (95% CI), Model 1                | Reference | 1.11 (0.96-1.27) | 1.07 (0.93-1.22) | 1.13 (0.99-1.30) | 1.06 (0.92-1.22) | 0.46    |
| HR (95% CI), Model 2                | Reference | 1.08 (0.95-1.24) | 1.04 (0.91-1.19) | 1.10 (0.95-1.26) | 1.01 (0.87-1.16) | 0.58    |
| <b>Other cancers</b>                |           |                  |                  |                  |                  |         |
| Events                              | 1149      | 976              | 1086             | 898              | 1080             |         |
| Person-years                        | 175658    | 170433           | 198260           | 178715           | 225408           |         |
| HR (95% CI), Model 1                | Reference | 0.85 (0.78-0.92) | 0.79 (0.73-0.86) | 0.72 (0.65-0.78) | 0.67 (0.61-0.72) | <0.0001 |
| HR (95% CI), Model 2                | Reference | 0.87 (0.79-0.94) | 0.82 (0.75-0.89) | 0.76 (0.69-0.83) | 0.73 (0.67-0.79) | <0.0001 |
| <b>Depression</b>                   |           |                  |                  |                  |                  |         |
| Events                              | 244       | 184              | 185              | 178              | 204              |         |
| Person-years                        | 174476    | 170054           | 197781           | 179290           | 227066           |         |
| HR (95% CI), Model 1                | Reference | 0.75 (0.62-0.91) | 0.64 (0.53-0.77) | 0.66 (0.54-0.80) | 0.58 (0.48-0.70) | <0.0001 |
| HR (95% CI), Model 2                | Reference | 0.80 (0.66-0.96) | 0.69 (0.57-0.84) | 0.75 (0.62-0.92) | 0.70 (0.58-0.85) | 0.0008  |
| <b>Anxiety</b>                      |           |                  |                  |                  |                  |         |
| Events                              | 665       | 543              | 603              | 488              | 622              |         |
| Person-years                        | 181770    | 176250           | 204367           | 185197           | 233488           |         |
| HR (95% CI), Model 1                | Reference | 0.80 (0.72-0.90) | 0.75 (0.67-0.83) | 0.64 (0.57-0.72) | 0.63 (0.56-0.70) | <0.0001 |
| HR (95% CI), Model 2                | Reference | 0.83 (0.74-0.93) | 0.79 (0.71-0.88) | 0.70 (0.62-0.79) | 0.71 (0.63-0.79) | <0.0001 |
| <b>Schizophrenia</b>                |           |                  |                  |                  |                  |         |
| Events                              | 24        | 25               | 19               | 21               | 26               |         |
| Person-years                        | 185265    | 179267           | 207936           | 188024           | 237271           |         |
| HR (95% CI), Model 1                | Reference | 1.05 (0.60-1.83) | 0.68 (0.37-1.24) | 0.81 (0.45-1.46) | 0.77 (0.44-1.35) | 0.56    |
| HR (95% CI), Model 2                | Reference | 1.19 (0.68-2.10) | 0.83 (0.45-1.52) | 1.06 (0.58-1.92) | 1.12 (0.63-1.99) | 0.80    |
| <b>Alcohol use disorder</b>         |           |                  |                  |                  |                  |         |
| Events                              | 232       | 165              | 145              | 122              | 91               |         |
| Person-years                        | 184872    | 179074           | 207866           | 188129           | 237508           |         |
| HR (95% CI), Model 1                | Reference | 0.75 (0.61-0.91) | 0.58 (0.47-0.71) | 0.55 (0.44-0.69) | 0.33 (0.26-0.43) | <0.0001 |
| HR (95% CI), Model 2                | Reference | 0.79 (0.64-0.96) | 0.63 (0.51-0.77) | 0.62 (0.50-0.78) | 0.39 (0.30-0.50) | <0.0001 |
| <b>Psychoactive substance abuse</b> |           |                  |                  |                  |                  |         |
| Events                              | 48        | 33               | 27               | 17               | 20               |         |
| Person-years                        | 185529    | 179448           | 208403           | 188477           | 237673           |         |
| HR (95% CI), Model 1                | Reference | 0.74 (0.47-1.15) | 0.54 (0.33-0.86) | 0.39 (0.22-0.68) | 0.38 (0.22-0.64) | 0.0004  |
| HR (95% CI), Model 2                | Reference | 0.81 (0.52-1.27) | 0.61 (0.38-0.99) | 0.47 (0.27-0.82) | 0.48 (0.28-0.82) | 0.0177  |
| <b>Epilepsy</b>                     |           |                  |                  |                  |                  |         |
| Events                              | 95        | 65               | 74               | 69               | 63               |         |
| Person-years                        | 184231    | 178569           | 206904           | 187535           | 236381           |         |



|                       |           |                  |                  |                  |                  |         |
|-----------------------|-----------|------------------|------------------|------------------|------------------|---------|
| HR (95% CI), Model 1  | Reference | 0.70 (0.51-0.95) | 0.68 (0.50-0.92) | 0.69 (0.51-0.95) | 0.50 (0.36-0.69) | 0.0009  |
| HR (95% CI), Model 2  | Reference | 0.71 (0.52-0.98) | 0.70 (0.51-0.94) | 0.73 (0.53-1.00) | 0.53 (0.38-0.74) | 0.0049  |
| Migraine              |           |                  |                  |                  |                  |         |
| Events                | 129       | 116              | 121              | 109              | 169              |         |
| Person-years          | 179707    | 173982           | 201481           | 182248           | 229349           |         |
| HR (95% CI), Model 1  | Reference | 0.91 (0.71-1.17) | 0.81 (0.63-1.03) | 0.79 (0.61-1.02) | 0.96 (0.76-1.21) | 0.24    |
| HR (95% CI), Model 2  | Reference | 0.91 (0.71-1.17) | 0.81 (0.63-1.04) | 0.80 (0.62-1.04) | 0.98 (0.77-1.24) | 0.24    |
| Dementia              |           |                  |                  |                  |                  |         |
| Events                | 144       | 132              | 130              | 108              | 159              |         |
| Person-years          | 185757    | 179703           | 208556           | 188577           | 237760           |         |
| HR (95% CI), Model 1  | Reference | 0.89 (0.70-1.13) | 0.72 (0.57-0.92) | 0.65 (0.51-0.84) | 0.74 (0.59-0.93) | 0.0045  |
| HR (95% CI), Model 2  | Reference | 0.91 (0.72-1.15) | 0.74 (0.59-0.95) | 0.68 (0.53-0.87) | 0.77 (0.61-0.97) | 0.0152  |
| Parkinson's disease   |           |                  |                  |                  |                  |         |
| Events                | 80        | 74               | 85               | 78               | 72               |         |
| Person-years          | 185636    | 179634           | 208288           | 188407           | 237582           |         |
| HR (95% CI), Model 1  | Reference | 0.93 (0.68-1.28) | 0.91 (0.67-1.23) | 0.93 (0.68-1.27) | 0.67 (0.49-0.93) | 0.15    |
| HR (95% CI), Model 2  | Reference | 0.92 (0.67-1.27) | 0.89 (0.66-1.21) | 0.91 (0.66-1.25) | 0.65 (0.47-0.90) | 0.10    |
| Multiple sclerosis    |           |                  |                  |                  |                  |         |
| Events                | 22        | 16               | 24               | 15               | 17               |         |
| Person-years          | 185090    | 179203           | 207783           | 187908           | 236904           |         |
| HR (95% CI), Model 1  | Reference | 0.75 (0.39-1.43) | 0.97 (0.54-1.73) | 0.66 (0.34-1.28) | 0.59 (0.31-1.13) | 0.41    |
| HR (95% CI), Model 2  | Reference | 0.78 (0.41-1.48) | 1.02 (0.57-1.84) | 0.72 (0.37-1.40) | 0.66 (0.35-1.28) | 0.58    |
| Bronchiectasis        |           |                  |                  |                  |                  |         |
| Events                | 147       | 126              | 130              | 107              | 138              |         |
| Person-years          | 185399    | 179273           | 207999           | 188116           | 237123           |         |
| HR (95% CI), Model 1  | Reference | 0.83 (0.65-1.05) | 0.70 (0.55-0.88) | 0.61 (0.48-0.78) | 0.59 (0.47-0.75) | <0.0001 |
| HR (95% CI), Model 2  | Reference | 0.85 (0.67-1.07) | 0.72 (0.57-0.92) | 0.63 (0.49-0.82) | 0.61 (0.48-0.78) | 0.0003  |
| Asthma                |           |                  |                  |                  |                  |         |
| Events                | 366       | 283              | 347              | 307              | 353              |         |
| Person-years          | 162356    | 157725           | 183538           | 166101           | 211731           |         |
| HR (95% CI), Model 1  | Reference | 0.77 (0.66-0.90) | 0.79 (0.69-0.92) | 0.76 (0.66-0.89) | 0.67 (0.58-0.78) | <0.0001 |
| HR (95% CI), Model 2  | Reference | 0.80 (0.68-0.94) | 0.84 (0.73-0.98) | 0.84 (0.72-0.98) | 0.77 (0.66-0.90) | 0.0108  |
| COPD                  |           |                  |                  |                  |                  |         |
| Events                | 472       | 362              | 348              | 273              | 299              |         |
| Person-years          | 183104    | 177747           | 206370           | 186843           | 235767           |         |
| HR (95% CI), Model 1  | Reference | 0.76 (0.66-0.87) | 0.61 (0.53-0.70) | 0.52 (0.45-0.61) | 0.44 (0.38-0.51) | <0.0001 |
| HR (95% CI), Model 2  | Reference | 0.84 (0.73-0.97) | 0.72 (0.63-0.83) | 0.65 (0.56-0.76) | 0.61 (0.52-0.70) | <0.0001 |
| CKD                   |           |                  |                  |                  |                  |         |
| Events                | 1006      | 803              | 830              | 670              | 749              |         |
| Person-years          | 184657    | 178865           | 207683           | 187803           | 236838           |         |
| HR (95% CI), Model 1  | Reference | 0.79 (0.72-0.87) | 0.68 (0.62-0.75) | 0.60 (0.55-0.67) | 0.52 (0.48-0.58) | <0.0001 |
| HR (95% CI), Model 2  | Reference | 0.83 (0.76-0.91) | 0.74 (0.68-0.81) | 0.68 (0.62-0.75) | 0.63 (0.58-0.70) | <0.0001 |
| Chronic liver disease |           |                  |                  |                  |                  |         |
| Events                | 65        | 52               | 51               | 41               | 27               |         |
| Person-years          | 184607    | 178945           | 207812           | 187506           | 236753           |         |

|                            |           |                  |                  |                  |                  |         |
|----------------------------|-----------|------------------|------------------|------------------|------------------|---------|
| HR (95% CI), Model 1       | Reference | 0.83 (0.58-1.20) | 0.70 (0.49-1.02) | 0.64 (0.43-0.94) | 0.34 (0.21-0.53) | 0.0001  |
| HR (95% CI), Model 2       | Reference | 0.91 (0.63-1.31) | 0.82 (0.56-1.18) | 0.79 (0.53-1.17) | 0.46 (0.29-0.74) | 0.0231  |
| Irritable bowel syndrome   |           |                  |                  |                  |                  |         |
| Events                     | 269       | 186              | 201              | 205              | 239              |         |
| Person-years               | 180794    | 174930           | 203270           | 183676           | 231855           |         |
| HR (95% CI), Model 1       | Reference | 0.68 (0.56-0.82) | 0.61 (0.51-0.73) | 0.66 (0.55-0.80) | 0.58 (0.49-0.70) | <0.0001 |
| HR (95% CI), Model 2       | Reference | 0.70 (0.58-0.85) | 0.65 (0.54-0.78) | 0.73 (0.60-0.87) | 0.67 (0.56-0.80) | <0.0001 |
| Inflammatory bowel disease |           |                  |                  |                  |                  |         |
| Events                     | 90        | 84               | 99               | 78               | 97               |         |
| Person-years               | 183284    | 178055           | 206771           | 186922           | 235926           |         |
| HR (95% CI), Model 1       | Reference | 0.97 (0.72-1.30) | 0.98 (0.74-1.31) | 0.86 (0.64-1.17) | 0.85 (0.64-1.14) | 0.74    |
| HR (95% CI), Model 2       | Reference | 1.00 (0.75-1.35) | 1.04 (0.78-1.38) | 0.93 (0.68-1.27) | 0.94 (0.70-1.27) | 0.95    |
| Treated constipation       |           |                  |                  |                  |                  |         |
| Events                     | 748       | 601              | 683              | 555              | 747              |         |
| Person-years               | 183504    | 177750           | 206238           | 186878           | 235367           |         |
| HR (95% CI), Model 1       | Reference | 0.80 (0.72-0.89) | 0.76 (0.69-0.84) | 0.67 (0.60-0.75) | 0.70 (0.63-0.78) | <0.0001 |
| HR (95% CI), Model 2       | Reference | 0.81 (0.73-0.90) | 0.78 (0.70-0.86) | 0.69 (0.62-0.77) | 0.73 (0.66-0.81) | <0.0001 |
| Dyspepsia                  |           |                  |                  |                  |                  |         |
| Events                     | 1967      | 1851             | 2049             | 1796             | 2152             |         |
| Person-years               | 161654    | 160170           | 186776           | 169731           | 216999           |         |
| HR (95% CI), Model 1       | Reference | 0.92 (0.86-0.98) | 0.86 (0.80-0.91) | 0.81 (0.76-0.86) | 0.74 (0.70-0.79) | <0.0001 |
| HR (95% CI), Model 2       | Reference | 0.94 (0.89-1.01) | 0.89 (0.83-0.94) | 0.86 (0.81-0.92) | 0.81 (0.76-0.86) | <0.0001 |
| Diverticular disease       |           |                  |                  |                  |                  |         |
| Events                     | 1652      | 1512             | 1733             | 1397             | 1708             |         |
| Person-years               | 178360    | 173725           | 201076           | 182796           | 231244           |         |
| HR (95% CI), Model 1       | Reference | 0.91 (0.85-0.98) | 0.88 (0.82-0.94) | 0.77 (0.72-0.83) | 0.73 (0.68-0.78) | <0.0001 |
| HR (95% CI), Model 2       | Reference | 0.94 (0.88-1.01) | 0.93 (0.87-0.99) | 0.83 (0.77-0.90) | 0.82 (0.77-0.88) | <0.0001 |
| Pernicious anaemia         |           |                  |                  |                  |                  |         |
| Events                     | 42        | 29               | 24               | 20               | 21               |         |
| Person-years               | 185284    | 179260           | 208111           | 188195           | 237266           |         |
| HR (95% CI), Model 1       | Reference | 0.68 (0.42-1.09) | 0.46 (0.28-0.77) | 0.41 (0.24-0.71) | 0.33 (0.19-0.56) | <0.0001 |
| HR (95% CI), Model 2       | Reference | 0.71 (0.44-1.14) | 0.50 (0.30-0.83) | 0.46 (0.27-0.79) | 0.38 (0.22-0.66) | 0.0024  |
| Fracture                   |           |                  |                  |                  |                  |         |
| Events                     | 141       | 136              | 142              | 149              | 191              |         |
| Person-years               | 184817    | 178762           | 207617           | 187792           | 236670           |         |
| HR (95% CI), Model 1       | Reference | 0.94 (0.74-1.19) | 0.80 (0.64-1.02) | 0.90 (0.72-1.14) | 0.87 (0.70-1.09) | 0.45    |
| HR (95% CI), Model 2       | Reference | 0.94 (0.74-1.18) | 0.79 (0.63-1.00) | 0.88 (0.70-1.11) | 0.83 (0.66-1.04) | 0.30    |
| Osteoporosis               |           |                  |                  |                  |                  |         |
| Events                     | 1220      | 1107             | 1272             | 1152             | 1364             |         |
| Person-years               | 169269    | 165208           | 190803           | 172687           | 218473           |         |
| HR (95% CI), Model 1       | Reference | 0.89 (0.82-0.96) | 0.85 (0.78-0.92) | 0.83 (0.76-0.90) | 0.74 (0.69-0.80) | <0.0001 |
| HR (95% CI), Model 2       | Reference | 0.92 (0.85-1.00) | 0.91 (0.84-0.98) | 0.92 (0.85-1.00) | 0.88 (0.81-0.95) | 0.0308  |
| Meniere's disease          |           |                  |                  |                  |                  |         |
| Events                     | 20        | 16               | 19               | 22               | 24               |         |
| Person-years               | 185327    | 179344           | 207816           | 188129           | 237036           |         |

|                                 |           |                  |                  |                  |                  |         |
|---------------------------------|-----------|------------------|------------------|------------------|------------------|---------|
| HR (95% CI), Model 1            | Reference | 0.82 (0.42-1.58) | 0.83 (0.44-1.56) | 1.06 (0.58-1.96) | 0.92 (0.50-1.68) | 0.91    |
| HR (95% CI), Model 2            | Reference | 0.84 (0.43-1.62) | 0.87 (0.46-1.63) | 1.14 (0.61-2.10) | 1.02 (0.55-1.89) | 0.88    |
| Eczema                          |           |                  |                  |                  |                  |         |
| Events                          |           | 259              | 217              | 226              | 197              | 233     |
| Person-years                    |           | 177847           | 172311           | 200365           | 181060           | 228585  |
| HR (95% CI), Model 1            | Reference | 0.85 (0.71-1.02) | 0.75 (0.63-0.90) | 0.72 (0.60-0.87) | 0.66 (0.56-0.80) | 0.0001  |
| HR (95% CI), Model 2            | Reference | 0.86 (0.72-1.04) | 0.77 (0.65-0.93) | 0.76 (0.63-0.91) | 0.72 (0.60-0.86) | 0.0034  |
| Glaucoma                        |           |                  |                  |                  |                  |         |
| Events                          |           | 266              | 287              | 327              | 282              | 381     |
| Person-years                    |           | 183795           | 177555           | 206177           | 186420           | 234904  |
| HR (95% CI), Model 1            | Reference | 1.08 (0.91-1.27) | 1.02 (0.87-1.21) | 0.97 (0.82-1.15) | 1.01 (0.86-1.19) | 0.78    |
| HR (95% CI), Model 2            | Reference | 1.07 (0.90-1.26) | 1.01 (0.86-1.19) | 0.95 (0.80-1.12) | 0.97 (0.83-1.14) | 0.69    |
| Cataract                        |           |                  |                  |                  |                  |         |
| Events                          |           | 1386             | 1306             | 1490             | 1482             | 1822    |
| Person-years                    |           | 180498           | 174625           | 202287           | 183047           | 230150  |
| HR (95% CI), Model 1            | Reference | 0.91 (0.85-0.98) | 0.85 (0.79-0.91) | 0.91 (0.84-0.98) | 0.85 (0.79-0.91) | <0.0001 |
| HR (95% CI), Model 2            | Reference | 0.92 (0.86-1.00) | 0.87 (0.80-0.93) | 0.93 (0.87-1.00) | 0.88 (0.82-0.94) | 0.0010  |
| AMD                             |           |                  |                  |                  |                  |         |
| Events                          |           | 222              | 247              | 256              | 243              | 310     |
| Person-years                    |           | 185448           | 179263           | 208165           | 188033           | 237161  |
| HR (95% CI), Model 1            | Reference | 1.08 (0.90-1.30) | 0.91 (0.76-1.09) | 0.92 (0.77-1.11) | 0.89 (0.74-1.05) | 0.15    |
| HR (95% CI), Model 2            | Reference | 1.10 (0.92-1.32) | 0.93 (0.78-1.12) | 0.96 (0.80-1.15) | 0.93 (0.78-1.11) | 0.31    |
| Thyroid disorders               |           |                  |                  |                  |                  |         |
| Events                          |           | 426              | 364              | 437              | 396              | 484     |
| Person-years                    |           | 174786           | 169636           | 196180           | 177193           | 223434  |
| HR (95% CI), Model 1            | Reference | 0.84 (0.73-0.96) | 0.84 (0.73-0.96) | 0.81 (0.71-0.93) | 0.75 (0.66-0.86) | 0.0010  |
| HR (95% CI), Model 2            | Reference | 0.86 (0.75-0.99) | 0.88 (0.77-1.01) | 0.88 (0.76-1.01) | 0.86 (0.75-0.98) | 0.16    |
| Prostate disorders <sup>†</sup> |           |                  |                  |                  |                  |         |
| Events                          |           | 757              | 635              | 687              | 582              | 649     |
| Person-years                    |           | 95699            | 83753            | 90280            | 73983            | 82675   |
| HR (95% CI), Model 1            | Reference | 0.90 (0.81-1.00) | 0.87 (0.78-0.96) | 0.89 (0.80-0.99) | 0.85 (0.77-0.95) | 0.0253  |
| HR (95% CI), Model 2            | Reference | 0.90 (0.81-1.00) | 0.87 (0.79-0.97) | 0.89 (0.80-1.00) | 0.86 (0.77-0.96) | 0.0463  |

AMD, age related macular degeneration; CI, confidence interval; CKD, chronic kidney disease; COPD, chronic obstructive pulmonary disease; HR, hazard ratio.

\*Cox proportional hazard regression models were used to examine associations of the Alternate Mediterranean Diet Index (quintiles) with the incidence of individual chronic diseases. The statistical tests were two-sided. Model 1 was adjusted for age and sex; Model 2 was adjusted for Model 1 plus ethnicity, education, income, smoking, alcohol consumption, sleep, physical activity, and GRS for longevity; Model 3 was adjusted for Model 2 and total energy intake.

<sup>†</sup>Cardiovascular disease includes coronary heart disease, heart failure, atrial fibrillation, other cardiac disease, stroke, and peripheral vascular disease.

<sup>‡</sup>All cancers encompass any type of cancer except for non-melanoma skin cancer.

<sup>§</sup>These analyses were conducted among women only.

<sup>¶</sup>These analyses were conducted among men only.

**Table S2. The association between the Anti-Empirical Dietary Inflammatory Index and the incidence of individual chronic diseases**

|                                           | Anti-Empirical Dietary Inflammatory Index |                  |                  |                  |                  | P-value<br>for<br>trend* |
|-------------------------------------------|-------------------------------------------|------------------|------------------|------------------|------------------|--------------------------|
|                                           | Quintile 1                                | Quintile 2       | Quintile 3       | Quintile 4       | Quintile 5       |                          |
| <b>Cardiovascular disease<sup>†</sup></b> |                                           |                  |                  |                  |                  |                          |
| Events                                    | 1848                                      | 1736             | 1787             | 1722             | 1832             |                          |
| Person-years                              | 186833                                    | 189651           | 189808           | 190269           | 190653           |                          |
| HR (95% CI), Model 1                      | Reference                                 | 0.86 (0.80-0.91) | 0.84 (0.78-0.89) | 0.77 (0.72-0.82) | 0.79 (0.74-0.84) | <0.0001                  |
| HR (95% CI), Model 2                      | Reference                                 | 0.90 (0.84-0.96) | 0.89 (0.83-0.95) | 0.84 (0.78-0.89) | 0.86 (0.81-0.92) | <0.0001                  |
| <b>Coronary heart disease</b>             |                                           |                  |                  |                  |                  |                          |
| Events                                    | 1044                                      | 959              | 953              | 898              | 966              |                          |
| Person-years                              | 194104                                    | 196233           | 196788           | 197158           | 197389           |                          |
| HR (95% CI), Model 1                      | Reference                                 | 0.84 (0.77-0.92) | 0.79 (0.73-0.87) | 0.71 (0.65-0.78) | 0.74 (0.68-0.81) | <0.0001                  |
| HR (95% CI), Model 2                      | Reference                                 | 0.90 (0.82-0.98) | 0.86 (0.79-0.94) | 0.79 (0.72-0.87) | 0.83 (0.76-0.91) | <0.0001                  |
| <b>Heart failure</b>                      |                                           |                  |                  |                  |                  |                          |
| Events                                    | 323                                       | 308              | 310              | 290              | 287              |                          |
| Person-years                              | 199849                                    | 201514           | 201814           | 201976           | 202480           |                          |
| HR (95% CI), Model 1                      | Reference                                 | 0.86 (0.73-1.00) | 0.81 (0.69-0.95) | 0.72 (0.61-0.84) | 0.68 (0.58-0.80) | <0.0001                  |
| HR (95% CI), Model 2                      | Reference                                 | 0.94 (0.81-1.10) | 0.91 (0.78-1.07) | 0.84 (0.71-0.98) | 0.81 (0.69-0.95) | 0.0696                   |
| <b>Atrial fibrillation</b>                |                                           |                  |                  |                  |                  |                          |
| Events                                    | 359                                       | 346              | 349              | 382              | 395              |                          |
| Person-years                              | 197275                                    | 199160           | 199268           | 199146           | 199806           |                          |
| HR (95% CI), Model 1                      | Reference                                 | 0.87 (0.75-1.01) | 0.82 (0.71-0.95) | 0.85 (0.74-0.98) | 0.84 (0.73-0.97) | 0.0639                   |
| HR (95% CI), Model 2                      | Reference                                 | 0.93 (0.81-1.08) | 0.89 (0.77-1.04) | 0.95 (0.82-1.11) | 0.95 (0.82-1.10) | 0.68                     |
| <b>Other cardiac disease</b>              |                                           |                  |                  |                  |                  |                          |
| Events                                    | 720                                       | 694              | 750              | 732              | 690              |                          |
| Person-years                              | 197356                                    | 199433           | 199456           | 199690           | 200659           |                          |
| HR (95% CI), Model 1                      | Reference                                 | 0.88 (0.79-0.97) | 0.90 (0.81-1.00) | 0.84 (0.76-0.93) | 0.76 (0.68-0.84) | <0.0001                  |
| HR (95% CI), Model 2                      | Reference                                 | 0.93 (0.84-1.03) | 0.96 (0.87-1.06) | 0.91 (0.82-1.01) | 0.84 (0.75-0.93) | 0.0179                   |
| <b>Stroke</b>                             |                                           |                  |                  |                  |                  |                          |
| Events                                    | 146                                       | 138              | 139              | 138              | 158              |                          |
| Person-years                              | 199885                                    | 201598           | 201696           | 202074           | 202395           |                          |
| HR (95% CI), Model 1                      | Reference                                 | 0.86 (0.68-1.09) | 0.82 (0.65-1.04) | 0.78 (0.61-0.98) | 0.86 (0.69-1.08) | 0.28                     |
| HR (95% CI), Model 2                      | Reference                                 | 0.89 (0.71-1.13) | 0.86 (0.68-1.08) | 0.82 (0.65-1.04) | 0.91 (0.72-1.15) | 0.53                     |
| <b>Peripheral vascular disease</b>        |                                           |                  |                  |                  |                  |                          |
| Events                                    | 194                                       | 153              | 165              | 176              | 182              |                          |
| Person-years                              | 199999                                    | 201870           | 202008           | 202356           | 202715           |                          |
| HR (95% CI), Model 1                      | Reference                                 | 0.73 (0.59-0.90) | 0.76 (0.62-0.93) | 0.78 (0.64-0.96) | 0.79 (0.64-0.97) | 0.0237                   |
| HR (95% CI), Model 2                      | Reference                                 | 0.74 (0.60-0.92) | 0.77 (0.63-0.95) | 0.80 (0.65-0.98) | 0.80 (0.65-0.99) | 0.0485                   |
| <b>Hypertension</b>                       |                                           |                  |                  |                  |                  |                          |
| Events                                    | 790                                       | 759              | 759              | 753              | 821              |                          |
| Person-years                              | 144563                                    | 150133           | 151007           | 153200           | 153548           |                          |
| HR (95% CI), Model 1                      | Reference                                 | 0.85 (0.77-0.94) | 0.80 (0.72-0.89) | 0.74 (0.67-0.82) | 0.79 (0.72-0.87) | <0.0001                  |
| HR (95% CI), Model 2                      | Reference                                 | 0.94 (0.85-1.03) | 0.90 (0.82-1.00) | 0.87 (0.78-0.96) | 0.94 (0.85-1.04) | 0.0741                   |

|                             |           |                  |                  |                  |                  |         |
|-----------------------------|-----------|------------------|------------------|------------------|------------------|---------|
| Diabetes                    |           |                  |                  |                  |                  |         |
| Events                      | 701       | 513              | 453              | 414              | 370              |         |
| Person-years                | 188726    | 193160           | 194638           | 196272           | 197261           |         |
| HR (95% CI), Model 1        | Reference | 0.68 (0.61-0.76) | 0.58 (0.51-0.65) | 0.51 (0.45-0.57) | 0.44 (0.39-0.50) | <0.0001 |
| HR (95% CI), Model 2        | Reference | 0.84 (0.75-0.94) | 0.74 (0.65-0.83) | 0.70 (0.62-0.80) | 0.64 (0.56-0.72) | <0.0001 |
| All cancers <sup>‡</sup>    |           |                  |                  |                  |                  |         |
| Events                      | 1118      | 1169             | 1232             | 1275             | 1255             |         |
| Person-years                | 183586    | 184369           | 184542           | 184284           | 185076           |         |
| HR (95% CI), Model 1        | Reference | 0.97 (0.89-1.05) | 0.98 (0.91-1.07) | 0.98 (0.91-1.06) | 0.94 (0.87-1.02) | 0.68    |
| HR (95% CI), Model 2        | Reference | 1.00 (0.92-1.08) | 1.01 (0.93-1.10) | 1.02 (0.94-1.10) | 0.97 (0.89-1.06) | 0.79    |
| Non-melanoma skin cancer    |           |                  |                  |                  |                  |         |
| Events                      | 612       | 654              | 701              | 805              | 787              |         |
| Person-years                | 196196    | 197290           | 197639           | 196936           | 197476           |         |
| HR (95% CI), Model 1        | Reference | 0.98 (0.88-1.09) | 1.00 (0.89-1.11) | 1.10 (0.99-1.22) | 1.04 (0.93-1.16) | 0.18    |
| HR (95% CI), Model 2        | Reference | 0.96 (0.86-1.07) | 0.97 (0.87-1.08) | 1.06 (0.95-1.18) | 1.01 (0.91-1.12) | 0.33    |
| Melanoma                    |           |                  |                  |                  |                  |         |
| Events                      | 71        | 110              | 99               | 102              | 103              |         |
| Person-years                | 199394    | 200612           | 200691           | 201006           | 201134           |         |
| HR (95% CI), Model 1        | Reference | 1.46 (1.09-1.97) | 1.28 (0.94-1.73) | 1.27 (0.94-1.73) | 1.26 (0.93-1.71) | 0.18    |
| HR (95% CI), Model 2        | Reference | 1.44 (1.06-1.94) | 1.25 (0.92-1.70) | 1.24 (0.91-1.68) | 1.23 (0.90-1.67) | 0.23    |
| Lung cancer                 |           |                  |                  |                  |                  |         |
| Events                      | 115       | 95               | 122              | 138              | 139              |         |
| Person-years                | 200687    | 202328           | 202506           | 202715           | 203121           |         |
| HR (95% CI), Model 1        | Reference | 0.75 (0.57-0.98) | 0.92 (0.71-1.19) | 0.99 (0.77-1.27) | 0.97 (0.76-1.25) | 0.21    |
| HR (95% CI), Model 2        | Reference | 0.78 (0.59-1.02) | 0.94 (0.72-1.21) | 1.00 (0.77-1.28) | 0.91 (0.71-1.17) | 0.36    |
| Stomach cancer              |           |                  |                  |                  |                  |         |
| Events                      | 30        | 34               | 23               | 35               | 23               |         |
| Person-years                | 201129    | 202687           | 202928           | 203082           | 203598           |         |
| HR (95% CI), Model 1        | Reference | 1.05 (0.64-1.72) | 0.67 (0.39-1.16) | 0.98 (0.60-1.60) | 0.62 (0.36-1.07) | 0.17    |
| HR (95% CI), Model 2        | Reference | 1.14 (0.69-1.86) | 0.74 (0.43-1.28) | 1.10 (0.67-1.80) | 0.70 (0.40-1.22) | 0.24    |
| Oesophageal cancer          |           |                  |                  |                  |                  |         |
| Events                      | 32        | 38               | 40               | 34               | 50               |         |
| Person-years                | 201073    | 202691           | 202889           | 203134           | 203481           |         |
| HR (95% CI), Model 1        | Reference | 1.08 (0.67-1.73) | 1.07 (0.67-1.70) | 0.86 (0.53-1.40) | 1.22 (0.78-1.91) | 0.63    |
| HR (95% CI), Model 2        | Reference | 1.19 (0.74-1.91) | 1.21 (0.75-1.93) | 1.01 (0.62-1.64) | 1.43 (0.91-2.25) | 0.48    |
| Colon cancer                |           |                  |                  |                  |                  |         |
| Events                      | 159       | 137              | 149              | 156              | 180              |         |
| Person-years                | 199602    | 201543           | 201603           | 201800           | 202169           |         |
| HR (95% CI), Model 1        | Reference | 0.79 (0.63-1.00) | 0.82 (0.66-1.03) | 0.83 (0.66-1.03) | 0.93 (0.75-1.15) | 0.22    |
| HR (95% CI), Model 2        | Reference | 0.82 (0.65-1.04) | 0.86 (0.69-1.08) | 0.87 (0.70-1.09) | 0.97 (0.78-1.21) | 0.36    |
| Ovarian cancer <sup>§</sup> |           |                  |                  |                  |                  |         |
| Events                      | 51        | 48               | 39               | 46               | 37               |         |
| Person-years                | 119355    | 121632           | 119607           | 118748           | 116206           |         |
| HR (95% CI), Model 1        | Reference | 0.89 (0.60-1.33) | 0.72 (0.47-1.09) | 0.84 (0.56-1.25) | 0.67 (0.44-1.03) | 0.36    |

|                                     |           |                  |                  |                  |                  |         |
|-------------------------------------|-----------|------------------|------------------|------------------|------------------|---------|
| HR (95% CI), Model 2                | Reference | 0.93 (0.62-1.38) | 0.76 (0.50-1.16) | 0.91 (0.60-1.36) | 0.75 (0.49-1.16) | 0.72    |
| <b>Breast cancer<sup>§</sup></b>    |           |                  |                  |                  |                  |         |
| Events                              | 371       | 408              | 392              | 378              | 357              |         |
| Person-years                        | 113147    | 114402           | 112356           | 111467           | 109061           |         |
| HR (95% CI), Model 1                | Reference | 1.08 (0.93-1.24) | 1.04 (0.90-1.20) | 1.01 (0.87-1.16) | 0.96 (0.83-1.12) | 0.61    |
| HR (95% CI), Model 2                | Reference | 1.10 (0.95-1.26) | 1.07 (0.93-1.23) | 1.03 (0.89-1.20) | 1.00 (0.86-1.16) | 0.63    |
| <b>Prostate cancer<sup>¶</sup></b>  |           |                  |                  |                  |                  |         |
| Events                              | 339       | 386              | 460              | 430              | 466              |         |
| Person-years                        | 91020     | 87982            | 89961            | 90493            | 93306            |         |
| HR (95% CI), Model 1                | Reference | 1.10 (0.95-1.27) | 1.21 (1.05-1.39) | 1.08 (0.94-1.25) | 1.11 (0.96-1.28) | 0.12    |
| HR (95% CI), Model 2                | Reference | 1.07 (0.93-1.24) | 1.17 (1.02-1.35) | 1.04 (0.90-1.20) | 1.07 (0.93-1.23) | 0.24    |
| <b>Other cancers</b>                |           |                  |                  |                  |                  |         |
| Events                              | 970       | 1000             | 1072             | 1073             | 1074             |         |
| Person-years                        | 186565    | 187613           | 187923           | 187849           | 188676           |         |
| HR (95% CI), Model 1                | Reference | 0.96 (0.88-1.05) | 0.99 (0.90-1.08) | 0.95 (0.87-1.04) | 0.93 (0.85-1.02) | 0.49    |
| HR (95% CI), Model 2                | Reference | 0.99 (0.90-1.08) | 1.02 (0.94-1.12) | 0.99 (0.91-1.08) | 0.97 (0.88-1.06) | 0.78    |
| <b>Depression</b>                   |           |                  |                  |                  |                  |         |
| Events                              | 242       | 217              | 167              | 203              | 166              |         |
| Person-years                        | 187863    | 190426           | 192127           | 192180           | 193075           |         |
| HR (95% CI), Model 1                | Reference | 0.89 (0.74-1.06) | 0.68 (0.56-0.83) | 0.83 (0.68-1.00) | 0.68 (0.56-0.83) | 0.0002  |
| HR (95% CI), Model 2                | Reference | 0.96 (0.80-1.16) | 0.74 (0.61-0.91) | 0.93 (0.77-1.12) | 0.77 (0.63-0.95) | 0.0102  |
| <b>Anxiety</b>                      |           |                  |                  |                  |                  |         |
| Events                              | 699       | 575              | 551              | 583              | 513              |         |
| Person-years                        | 194044    | 196717           | 197311           | 197589           | 198659           |         |
| HR (95% CI), Model 1                | Reference | 0.79 (0.71-0.89) | 0.75 (0.67-0.84) | 0.79 (0.70-0.88) | 0.69 (0.61-0.77) | <0.0001 |
| HR (95% CI), Model 2                | Reference | 0.83 (0.75-0.93) | 0.80 (0.71-0.89) | 0.85 (0.76-0.95) | 0.75 (0.67-0.84) | <0.0001 |
| <b>Schizophrenia</b>                |           |                  |                  |                  |                  |         |
| Events                              | 21        | 28               | 24               | 18               | 24               |         |
| Person-years                        | 200500    | 202104           | 202506           | 202736           | 203097           |         |
| HR (95% CI), Model 1                | Reference | 1.34 (0.76-2.37) | 1.14 (0.63-2.05) | 0.85 (0.45-1.59) | 1.12 (0.62-2.01) | 0.63    |
| HR (95% CI), Model 2                | Reference | 1.56 (0.88-2.75) | 1.37 (0.76-2.48) | 1.08 (0.57-2.05) | 1.48 (0.81-2.72) | 0.49    |
| <b>Alcohol use disorder</b>         |           |                  |                  |                  |                  |         |
| Events                              | 100       | 127              | 143              | 165              | 220              |         |
| Person-years                        | 200127    | 201683           | 201905           | 202129           | 202317           |         |
| HR (95% CI), Model 1                | Reference | 1.26 (0.97-1.63) | 1.38 (1.07-1.79) | 1.57 (1.23-2.02) | 2.05 (1.62-2.61) | <0.0001 |
| HR (95% CI), Model 2                | Reference | 1.30 (1.00-1.70) | 1.42 (1.10-1.84) | 1.62 (1.26-2.09) | 2.05 (1.61-2.61) | <0.0001 |
| <b>Psychoactive substance abuse</b> |           |                  |                  |                  |                  |         |
| Events                              | 20        | 26               | 34               | 33               | 32               |         |
| Person-years                        | 200957    | 202440           | 202722           | 203034           | 203466           |         |
| HR (95% CI), Model 1                | Reference | 1.32 (0.74-2.36) | 1.72 (0.99-3.00) | 1.68 (0.96-2.94) | 1.62 (0.92-2.84) | 0.29    |
| HR (95% CI), Model 2                | Reference | 1.45 (0.81-2.60) | 1.92 (1.10-3.36) | 1.89 (1.08-3.33) | 1.80 (1.01-3.19) | 0.14    |
| <b>Epilepsy</b>                     |           |                  |                  |                  |                  |         |
| Events                              | 76        | 66               | 66               | 80               | 78               |         |
| Person-years                        | 199204    | 201090           | 201470           | 201703           | 202274           |         |

|                       |           |                  |                  |                  |                  |         |
|-----------------------|-----------|------------------|------------------|------------------|------------------|---------|
| HR (95% CI), Model 1  | Reference | 0.82 (0.59-1.14) | 0.79 (0.57-1.11) | 0.94 (0.68-1.29) | 0.90 (0.66-1.24) | 0.63    |
| HR (95% CI), Model 2  | Reference | 0.83 (0.60-1.16) | 0.82 (0.59-1.14) | 0.97 (0.70-1.33) | 0.93 (0.67-1.28) | 0.69    |
| Migraine              |           |                  |                  |                  |                  |         |
| Events                | 143       | 117              | 131              | 150              | 103              |         |
| Person-years          | 191840    | 194757           | 196398           | 196839           | 197851           |         |
| HR (95% CI), Model 1  | Reference | 0.80 (0.62-1.02) | 0.89 (0.70-1.13) | 1.02 (0.81-1.29) | 0.71 (0.55-0.91) | 0.0198  |
| HR (95% CI), Model 2  | Reference | 0.81 (0.63-1.04) | 0.90 (0.71-1.14) | 1.03 (0.82-1.30) | 0.71 (0.54-0.92) | 0.0207  |
| Dementia              |           |                  |                  |                  |                  |         |
| Events                | 123       | 131              | 135              | 140              | 144              |         |
| Person-years          | 200957    | 202488           | 202728           | 202936           | 203319           |         |
| HR (95% CI), Model 1  | Reference | 0.93 (0.73-1.19) | 0.89 (0.70-1.14) | 0.86 (0.68-1.10) | 0.85 (0.67-1.09) | 0.72    |
| HR (95% CI), Model 2  | Reference | 0.95 (0.74-1.21) | 0.91 (0.71-1.16) | 0.89 (0.69-1.14) | 0.88 (0.69-1.13) | 0.85    |
| Parkinson's disease   |           |                  |                  |                  |                  |         |
| Events                | 64        | 78               | 83               | 73               | 91               |         |
| Person-years          | 200699    | 202339           | 202561           | 203007           | 203247           |         |
| HR (95% CI), Model 1  | Reference | 1.06 (0.76-1.48) | 1.06 (0.76-1.46) | 0.87 (0.63-1.22) | 1.05 (0.76-1.45) | 0.73    |
| HR (95% CI), Model 2  | Reference | 1.06 (0.76-1.47) | 1.05 (0.75-1.46) | 0.87 (0.62-1.22) | 1.05 (0.76-1.46) | 0.71    |
| Multiple sclerosis    |           |                  |                  |                  |                  |         |
| Events                | 27        | 18               | 17               | 19               | 13               |         |
| Person-years          | 200478    | 201794           | 202474           | 202431           | 202895           |         |
| HR (95% CI), Model 1  | Reference | 0.67 (0.37-1.22) | 0.64 (0.35-1.18) | 0.73 (0.41-1.32) | 0.51 (0.26-0.99) | 0.32    |
| HR (95% CI), Model 2  | Reference | 0.68 (0.37-1.24) | 0.65 (0.35-1.20) | 0.74 (0.40-1.34) | 0.50 (0.25-0.99) | 0.33    |
| Bronchiectasis        |           |                  |                  |                  |                  |         |
| Events                | 123       | 124              | 119              | 156              | 126              |         |
| Person-years          | 200239    | 201926           | 202100           | 202264           | 202731           |         |
| HR (95% CI), Model 1  | Reference | 0.90 (0.70-1.16) | 0.83 (0.64-1.06) | 1.03 (0.81-1.31) | 0.81 (0.63-1.04) | 0.19    |
| HR (95% CI), Model 2  | Reference | 0.91 (0.71-1.17) | 0.83 (0.64-1.07) | 1.03 (0.81-1.31) | 0.81 (0.63-1.04) | 0.18    |
| Asthma                |           |                  |                  |                  |                  |         |
| Events                | 337       | 325              | 347              | 349              | 298              |         |
| Person-years          | 171449    | 174064           | 175110           | 176889           | 177283           |         |
| HR (95% CI), Model 1  | Reference | 0.93 (0.79-1.08) | 0.97 (0.83-1.12) | 0.95 (0.82-1.10) | 0.80 (0.68-0.94) | 0.0603  |
| HR (95% CI), Model 2  | Reference | 1.00 (0.86-1.17) | 1.07 (0.92-1.24) | 1.08 (0.93-1.26) | 0.92 (0.79-1.08) | 0.30    |
| COPD                  |           |                  |                  |                  |                  |         |
| Events                | 379       | 361              | 345              | 309              | 360              |         |
| Person-years          | 197312    | 199294           | 199736           | 200265           | 200106           |         |
| HR (95% CI), Model 1  | Reference | 0.86 (0.74-0.99) | 0.78 (0.67-0.90) | 0.66 (0.57-0.77) | 0.75 (0.65-0.87) | <0.0001 |
| HR (95% CI), Model 2  | Reference | 0.91 (0.79-1.06) | 0.82 (0.71-0.95) | 0.70 (0.60-0.82) | 0.75 (0.65-0.87) | <0.0001 |
| CKD                   |           |                  |                  |                  |                  |         |
| Events                | 986       | 812              | 790              | 757              | 713              |         |
| Person-years          | 196633    | 198873           | 199715           | 199923           | 200682           |         |
| HR (95% CI), Model 1  | Reference | 0.74 (0.67-0.81) | 0.67 (0.61-0.74) | 0.61 (0.56-0.67) | 0.56 (0.51-0.61) | <0.0001 |
| HR (95% CI), Model 2  | Reference | 0.81 (0.74-0.89) | 0.77 (0.70-0.84) | 0.72 (0.65-0.79) | 0.67 (0.61-0.74) | <0.0001 |
| Chronic liver disease |           |                  |                  |                  |                  |         |
| Events                | 64        | 56               | 38               | 46               | 32               |         |
| Person-years          | 199927    | 201719           | 201866           | 202205           | 202618           |         |



|                            |           |                  |                  |                  |                  |         |
|----------------------------|-----------|------------------|------------------|------------------|------------------|---------|
| HR (95% CI), Model 1       | Reference | 0.83 (0.58-1.20) | 0.55 (0.37-0.83) | 0.66 (0.45-0.96) | 0.45 (0.29-0.69) | 0.0012  |
| HR (95% CI), Model 2       | Reference | 0.95 (0.66-1.36) | 0.64 (0.43-0.96) | 0.79 (0.54-1.17) | 0.55 (0.35-0.85) | 0.0314  |
| Irritable bowel syndrome   |           |                  |                  |                  |                  |         |
| Events                     | 259       | 241              | 224              | 210              | 166              |         |
| Person-years               | 193652    | 196297           | 197214           | 198070           | 198671           |         |
| HR (95% CI), Model 1       | Reference | 0.90 (0.75-1.07) | 0.83 (0.69-0.99) | 0.77 (0.64-0.92) | 0.61 (0.50-0.74) | <0.0001 |
| HR (95% CI), Model 2       | Reference | 0.94 (0.79-1.12) | 0.87 (0.73-1.04) | 0.82 (0.68-0.99) | 0.65 (0.54-0.80) | 0.0006  |
| Inflammatory bowel disease |           |                  |                  |                  |                  |         |
| Events                     | 97        | 91               | 96               | 88               | 76               |         |
| Person-years               | 198310    | 200248           | 200848           | 201415           | 201833           |         |
| HR (95% CI), Model 1       | Reference | 0.92 (0.69-1.23) | 0.97 (0.73-1.28) | 0.88 (0.66-1.17) | 0.75 (0.56-1.02) | 0.40865 |
| HR (95% CI), Model 2       | Reference | 0.96 (0.72-1.28) | 1.01 (0.76-1.35) | 0.93 (0.69-1.25) | 0.79 (0.58-1.07) | 0.53324 |
| Treated constipation       |           |                  |                  |                  |                  |         |
| Events                     | 686       | 699              | 646              | 664              | 639              |         |
| Person-years               | 196546    | 197739           | 198510           | 198591           | 199575           |         |
| HR (95% CI), Model 1       | Reference | 0.95 (0.86-1.06) | 0.85 (0.76-0.94) | 0.84 (0.76-0.94) | 0.79 (0.71-0.88) | <0.0001 |
| HR (95% CI), Model 2       | Reference | 0.98 (0.88-1.09) | 0.87 (0.78-0.97) | 0.88 (0.79-0.98) | 0.83 (0.74-0.92) | 0.0022  |
| Dyspepsia                  |           |                  |                  |                  |                  |         |
| Events                     | 2094      | 2038             | 1903             | 1962             | 1818             |         |
| Person-years               | 167220    | 171736           | 173649           | 176081           | 176843           |         |
| HR (95% CI), Model 1       | Reference | 0.91 (0.85-0.96) | 0.82 (0.77-0.87) | 0.81 (0.76-0.86) | 0.74 (0.69-0.79) | <0.0001 |
| HR (95% CI), Model 2       | Reference | 0.95 (0.89-1.01) | 0.86 (0.81-0.92) | 0.87 (0.82-0.93) | 0.80 (0.75-0.85) | <0.0001 |
| Diverticular disease       |           |                  |                  |                  |                  |         |
| Events                     | 1613      | 1668             | 1573             | 1596             | 1552             |         |
| Person-years               | 187128    | 189159           | 190264           | 190303           | 191041           |         |
| HR (95% CI), Model 1       | Reference | 0.97 (0.91-1.04) | 0.88 (0.82-0.94) | 0.87 (0.81-0.93) | 0.82 (0.77-0.88) | <0.0001 |
| HR (95% CI), Model 2       | Reference | 1.01 (0.94-1.08) | 0.92 (0.86-0.99) | 0.92 (0.85-0.98) | 0.87 (0.81-0.94) | <0.0001 |
| Pernicious anaemia         |           |                  |                  |                  |                  |         |
| Events                     | 37        | 24               | 28               | 21               | 26               |         |
| Person-years               | 200237    | 202245           | 202498           | 202893           | 203335           |         |
| HR (95% CI), Model 1       | Reference | 0.62 (0.37-1.03) | 0.71 (0.43-1.16) | 0.52 (0.30-0.89) | 0.63 (0.38-1.05) | 0.13    |
| HR (95% CI), Model 2       | Reference | 0.67 (0.40-1.12) | 0.77 (0.47-1.27) | 0.59 (0.34-1.01) | 0.73 (0.43-1.22) | 0.34    |
| Fracture                   |           |                  |                  |                  |                  |         |
| Events                     | 137       | 142              | 147              | 146              | 187              |         |
| Person-years               | 199728    | 201368           | 201526           | 201878           | 202025           |         |
| HR (95% CI), Model 1       | Reference | 0.94 (0.74-1.19) | 0.94 (0.74-1.18) | 0.89 (0.70-1.12) | 1.12 (0.90-1.40) | 0.26    |
| HR (95% CI), Model 2       | Reference | 0.90 (0.71-1.14) | 0.88 (0.70-1.12) | 0.82 (0.65-1.04) | 1.02 (0.81-1.27) | 0.29    |
| Osteoporosis               |           |                  |                  |                  |                  |         |
| Events                     | 1187      | 1240             | 1228             | 1261             | 1199             |         |
| Person-years               | 178374    | 181130           | 181072           | 180895           | 181934           |         |
| HR (95% CI), Model 1       | Reference | 0.96 (0.88-1.04) | 0.91 (0.84-0.99) | 0.91 (0.84-0.98) | 0.84 (0.78-0.91) | 0.0005  |
| HR (95% CI), Model 2       | Reference | 1.04 (0.96-1.12) | 1.02 (0.94-1.10) | 1.04 (0.96-1.13) | 0.99 (0.91-1.07) | 0.63    |
| Meniere's disease          |           |                  |                  |                  |                  |         |
| Events                     | 17        | 23               | 24               | 21               | 16               |         |

|                                       |           |                  |                  |                  |                  |         |
|---------------------------------------|-----------|------------------|------------------|------------------|------------------|---------|
| Person-years                          | 200507    | 202171           | 202510           | 202645           | 203075           |         |
| HR (95% CI), Model 1                  | Reference | 1.29 (0.69-2.42) | 1.33 (0.71-2.47) | 1.14 (0.60-2.17) | 0.86 (0.43-1.71) | 0.65    |
| HR (95% CI), Model 2                  | Reference | 1.37 (0.73-2.57) | 1.43 (0.76-2.68) | 1.27 (0.66-2.42) | 0.99 (0.49-1.99) | 0.68    |
| <b>Eczema</b>                         |           |                  |                  |                  |                  |         |
| Events                                | 205       | 247              | 231              | 229              | 220              |         |
| Person-years                          | 191932    | 194023           | 193673           | 194669           | 195035           |         |
| HR (95% CI), Model 1                  | Reference | 1.14 (0.95-1.37) | 1.04 (0.86-1.26) | 1.01 (0.83-1.22) | 0.95 (0.79-1.15) | 0.36    |
| HR (95% CI), Model 2                  | Reference | 1.19 (0.99-1.43) | 1.09 (0.90-1.32) | 1.06 (0.87-1.28) | 1.00 (0.82-1.21) | 0.29    |
| <b>Glaucoma</b>                       |           |                  |                  |                  |                  |         |
| Events                                | 275       | 305              | 326              | 315              | 322              |         |
| Person-years                          | 198363    | 199600           | 199659           | 199726           | 199802           |         |
| HR (95% CI), Model 1                  | Reference | 1.01 (0.86-1.19) | 1.02 (0.87-1.20) | 0.94 (0.80-1.11) | 0.94 (0.80-1.10) | 0.71    |
| HR (95% CI), Model 2                  | Reference | 1.00 (0.85-1.18) | 1.01 (0.86-1.19) | 0.93 (0.79-1.10) | 0.92 (0.78-1.09) | 0.68    |
| <b>Cataract</b>                       |           |                  |                  |                  |                  |         |
| Events                                | 1328      | 1466             | 1521             | 1579             | 1592             |         |
| Person-years                          | 190741    | 191767           | 191558           | 191364           | 191468           |         |
| HR (95% CI), Model 1                  | Reference | 0.98 (0.91-1.05) | 0.96 (0.89-1.03) | 0.94 (0.87-1.01) | 0.92 (0.85-0.99) | 0.17    |
| HR (95% CI), Model 2                  | Reference | 1.00 (0.93-1.08) | 0.99 (0.92-1.07) | 0.98 (0.91-1.06) | 0.97 (0.90-1.04) | 0.84    |
| <b>AMD</b>                            |           |                  |                  |                  |                  |         |
| Events                                | 218       | 230              | 281              | 270              | 279              |         |
| Person-years                          | 199986    | 201698           | 201608           | 201932           | 202191           |         |
| HR (95% CI), Model 1                  | Reference | 0.93 (0.77-1.12) | 1.08 (0.90-1.29) | 0.97 (0.81-1.16) | 0.98 (0.82-1.17) | 0.55    |
| HR (95% CI), Model 2                  | Reference | 0.95 (0.79-1.15) | 1.11 (0.93-1.33) | 1.01 (0.84-1.21) | 1.03 (0.86-1.23) | 0.52    |
| <b>Thyroid disorders</b>              |           |                  |                  |                  |                  |         |
| Events                                | 469       | 436              | 452              | 411              | 339              |         |
| Person-years                          | 186182    | 188418           | 189506           | 190376           | 191472           |         |
| HR (95% CI), Model 1                  | Reference | 0.87 (0.77-1.00) | 0.89 (0.78-1.01) | 0.79 (0.69-0.90) | 0.65 (0.56-0.75) | <0.0001 |
| HR (95% CI), Model 2                  | Reference | 0.92 (0.81-1.05) | 0.95 (0.83-1.08) | 0.86 (0.75-0.98) | 0.71 (0.62-0.82) | <0.0001 |
| <b>Prostate disorders<sup>†</sup></b> |           |                  |                  |                  |                  |         |
| Events                                | 597       | 644              | 710              | 696              | 663              |         |
| Person-years                          | 85125     | 82111            | 83562            | 84017            | 87117            |         |
| HR (95% CI), Model 1                  | Reference | 1.03 (0.92-1.15) | 1.06 (0.95-1.18) | 0.99 (0.88-1.10) | 0.88 (0.79-0.99) | 0.0105  |
| HR (95% CI), Model 2                  | Reference | 1.04 (0.93-1.16) | 1.07 (0.96-1.19) | 0.99 (0.89-1.11) | 0.89 (0.79-1.00) | 0.0135  |

AMD, age related macular degeneration; CI, confidence interval; CKD, chronic kidney disease; COPD, chronic obstructive pulmonary disease; HR, hazard ratio.

\*Cox proportional hazard regression models were used to examine associations of the Anti-Empirical Dietary Inflammatory Index (quintiles) with the incidence of individual chronic diseases. The statistical tests were two-sided. Model 1 was adjusted for age and sex; Model 2 was adjusted for Model 1 plus ethnicity, education, income, smoking, alcohol consumption, sleep, physical activity, and GRS for longevity; Model 3 was adjusted for Model 2 and total energy intake.

<sup>†</sup>All cancers encompass any type of cancer except for non-melanoma skin cancer.

<sup>‡</sup>These analyses were conducted among women only.

†These analyses were conducted among men only.

**Table S3. The association between the Alternate Healthy Eating Index-2010 and the incidence of individual chronic diseases**

|                                           | Alternate Healthy Eating Index-2010 |                  |                  |                  |                  | P-value<br>for trend* |
|-------------------------------------------|-------------------------------------|------------------|------------------|------------------|------------------|-----------------------|
|                                           | Quintile 1                          | Quintile 2       | Quintile 3       | Quintile 4       | Quintile 5       |                       |
| <b>Cardiovascular disease<sup>†</sup></b> |                                     |                  |                  |                  |                  |                       |
| Events                                    | 1975                                | 1833             | 1792             | 1661             | 1664             |                       |
| Person-years                              | 185979                              | 188764           | 189463           | 191239           | 191769           |                       |
| HR (95% CI), Model 1                      | Reference                           | 0.89 (0.84-0.95) | 0.85 (0.80-0.91) | 0.78 (0.73-0.84) | 0.79 (0.73-0.84) | <0.0001               |
| HR (95% CI), Model 2                      | Reference                           | 0.92 (0.87-0.98) | 0.89 (0.84-0.95) | 0.83 (0.78-0.89) | 0.84 (0.79-0.90) | <0.0001               |
| <b>Coronary heart disease</b>             |                                     |                  |                  |                  |                  |                       |
| Events                                    | 1079                                | 995              | 969              | 867              | 910              |                       |
| Person-years                              | 193741                              | 195960           | 196214           | 197460           | 198296           |                       |
| HR (95% CI), Model 1                      | Reference                           | 0.91 (0.83-0.99) | 0.87 (0.80-0.95) | 0.79 (0.72-0.86) | 0.84 (0.76-0.91) | <0.0001               |
| HR (95% CI), Model 2                      | Reference                           | 0.95 (0.87-1.03) | 0.93 (0.85-1.01) | 0.85 (0.78-0.93) | 0.91 (0.83-1.00) | 0.0116                |
| <b>Heart failure</b>                      |                                     |                  |                  |                  |                  |                       |
| Events                                    | 350                                 | 303              | 297              | 292              | 276              |                       |
| Person-years                              | 199551                              | 201424           | 201444           | 202248           | 202966           |                       |
| HR (95% CI), Model 1                      | Reference                           | 0.83 (0.71-0.97) | 0.79 (0.68-0.92) | 0.78 (0.66-0.91) | 0.73 (0.62-0.85) | 0.0010                |
| HR (95% CI), Model 2                      | Reference                           | 0.88 (0.76-1.03) | 0.87 (0.74-1.01) | 0.86 (0.73-1.01) | 0.82 (0.70-0.97) | 0.16                  |
| <b>Atrial fibrillation</b>                |                                     |                  |                  |                  |                  |                       |
| Events                                    | 411                                 | 395              | 360              | 327              | 338              |                       |
| Person-years                              | 196643                              | 198694           | 199093           | 199827           | 200397           |                       |
| HR (95% CI), Model 1                      | Reference                           | 0.93 (0.81-1.06) | 0.82 (0.71-0.95) | 0.75 (0.65-0.87) | 0.78 (0.67-0.90) | 0.0003                |
| HR (95% CI), Model 2                      | Reference                           | 0.96 (0.84-1.11) | 0.87 (0.76-1.01) | 0.80 (0.69-0.93) | 0.85 (0.73-0.98) | 0.0204                |
| <b>Other cardiac disease</b>              |                                     |                  |                  |                  |                  |                       |
| Events                                    | 828                                 | 751              | 691              | 648              | 668              |                       |
| Person-years                              | 197059                              | 198933           | 199286           | 200478           | 200839           |                       |
| HR (95% CI), Model 1                      | Reference                           | 0.87 (0.79-0.96) | 0.78 (0.70-0.86) | 0.72 (0.65-0.80) | 0.74 (0.67-0.82) | <0.0001               |
| HR (95% CI), Model 2                      | Reference                           | 0.91 (0.82-1.00) | 0.82 (0.74-0.91) | 0.78 (0.70-0.86) | 0.80 (0.72-0.89) | <0.0001               |
| <b>Stroke</b>                             |                                     |                  |                  |                  |                  |                       |
| Events                                    | 164                                 | 152              | 166              | 129              | 108              |                       |
| Person-years                              | 199593                              | 201177           | 201529           | 202315           | 203033           |                       |
| HR (95% CI), Model 1                      | Reference                           | 0.89 (0.71-1.11) | 0.94 (0.76-1.17) | 0.73 (0.58-0.91) | 0.60 (0.47-0.77) | 0.0002                |
| HR (95% CI), Model 2                      | Reference                           | 0.92 (0.73-1.14) | 0.98 (0.79-1.21) | 0.76 (0.60-0.96) | 0.63 (0.49-0.81) | 0.0009                |
| <b>Peripheral vascular disease</b>        |                                     |                  |                  |                  |                  |                       |
| Events                                    | 200                                 | 191              | 149              | 172              | 158              |                       |
| Person-years                              | 199831                              | 201553           | 201931           | 202589           | 203044           |                       |
| HR (95% CI), Model 1                      | Reference                           | 0.92 (0.75-1.12) | 0.70 (0.56-0.86) | 0.80 (0.65-0.98) | 0.73 (0.59-0.90) | 0.0029                |
| HR (95% CI), Model 2                      | Reference                           | 0.95 (0.78-1.16) | 0.72 (0.58-0.89) | 0.84 (0.68-1.03) | 0.75 (0.61-0.93) | 0.0092                |
| <b>Hypertension</b>                       |                                     |                  |                  |                  |                  |                       |
| Events                                    | 923                                 | 805              | 771              | 680              | 703              |                       |
| Person-years                              | 146130                              | 149622           | 150963           | 152234           | 153502           |                       |
| HR (95% CI), Model 1                      | Reference                           | 0.83 (0.75-0.91) | 0.77 (0.70-0.84) | 0.67 (0.61-0.74) | 0.68 (0.62-0.75) | <0.0001               |

|                                   |           |                  |                  |                  |                  |         |
|-----------------------------------|-----------|------------------|------------------|------------------|------------------|---------|
| HR (95% CI), Model 2              | Reference | 0.88 (0.80-0.97) | 0.83 (0.75-0.91) | 0.74 (0.67-0.82) | 0.77 (0.70-0.85) | <0.0001 |
| <b>Diabetes</b>                   |           |                  |                  |                  |                  |         |
| Events                            | 599       | 491              | 460              | 476              | 425              |         |
| Person-years                      | 192079    | 194081           | 194613           | 194307           | 194977           |         |
| HR (95% CI), Model 1              | Reference | 0.81 (0.72-0.91) | 0.75 (0.67-0.85) | 0.79 (0.70-0.89) | 0.71 (0.63-0.80) | <0.0001 |
| HR (95% CI), Model 2              | Reference | 0.91 (0.81-1.02) | 0.90 (0.79-1.01) | 0.96 (0.85-1.08) | 0.88 (0.78-1.00) | 0.25    |
| <b>All cancers<sup>‡</sup></b>    |           |                  |                  |                  |                  |         |
| Events                            | 1351      | 1199             | 1207             | 1165             | 1127             |         |
| Person-years                      | 180774    | 184901           | 184419           | 185453           | 186311           |         |
| HR (95% CI), Model 1              | Reference | 0.83 (0.77-0.89) | 0.81 (0.75-0.88) | 0.77 (0.72-0.84) | 0.73 (0.68-0.80) | <0.0001 |
| HR (95% CI), Model 2              | Reference | 0.86 (0.79-0.93) | 0.85 (0.79-0.92) | 0.82 (0.76-0.89) | 0.79 (0.73-0.86) | <0.0001 |
| <b>Non-melanoma skin cancer</b>   |           |                  |                  |                  |                  |         |
| Events                            | 725       | 720              | 716              | 718              | 680              |         |
| Person-years                      | 195365    | 197061           | 196938           | 197728           | 198444           |         |
| HR (95% CI), Model 1              | Reference | 0.95 (0.86-1.05) | 0.92 (0.83-1.02) | 0.92 (0.83-1.02) | 0.86 (0.77-0.96) | 0.0821  |
| HR (95% CI), Model 2              | Reference | 0.92 (0.83-1.03) | 0.89 (0.80-0.98) | 0.88 (0.80-0.98) | 0.81 (0.73-0.91) | 0.0049  |
| <b>Melanoma</b>                   |           |                  |                  |                  |                  |         |
| Events                            | 105       | 80               | 98               | 96               | 106              |         |
| Person-years                      | 198830    | 200547           | 200443           | 201177           | 201840           |         |
| HR (95% CI), Model 1              | Reference | 0.73 (0.55-0.98) | 0.88 (0.67-1.16) | 0.86 (0.65-1.13) | 0.93 (0.71-1.23) | 0.31    |
| HR (95% CI), Model 2              | Reference | 0.73 (0.54-0.97) | 0.88 (0.67-1.16) | 0.86 (0.65-1.14) | 0.95 (0.72-1.25) | 0.26    |
| <b>Lung cancer</b>                |           |                  |                  |                  |                  |         |
| Events                            | 171       | 114              | 114              | 110              | 100              |         |
| Person-years                      | 200269    | 202205           | 202288           | 203001           | 203593           |         |
| HR (95% CI), Model 1              | Reference | 0.62 (0.49-0.78) | 0.59 (0.47-0.75) | 0.56 (0.44-0.71) | 0.49 (0.38-0.63) | <0.0001 |
| HR (95% CI), Model 2              | Reference | 0.69 (0.54-0.87) | 0.68 (0.53-0.86) | 0.67 (0.52-0.85) | 0.60 (0.47-0.78) | 0.0003  |
| <b>Stomach cancer</b>             |           |                  |                  |                  |                  |         |
| Events                            | 30        | 34               | 27               | 29               | 25               |         |
| Person-years                      | 200961    | 202536           | 202660           | 203301           | 203965           |         |
| HR (95% CI), Model 1              | Reference | 1.13 (0.69-1.85) | 0.89 (0.53-1.50) | 0.97 (0.58-1.62) | 0.85 (0.50-1.45) | 0.84    |
| HR (95% CI), Model 2              | Reference | 1.19 (0.72-1.94) | 0.96 (0.57-1.63) | 1.06 (0.63-1.78) | 0.95 (0.55-1.63) | 0.91    |
| <b>Oesophageal cancer</b>         |           |                  |                  |                  |                  |         |
| Events                            | 51        | 38               | 40               | 31               | 34               |         |
| Person-years                      | 200803    | 202548           | 202616           | 203339           | 203962           |         |
| HR (95% CI), Model 1              | Reference | 0.73 (0.48-1.10) | 0.75 (0.50-1.14) | 0.59 (0.37-0.92) | 0.64 (0.42-1.00) | 0.15    |
| HR (95% CI), Model 2              | Reference | 0.79 (0.52-1.21) | 0.84 (0.55-1.28) | 0.67 (0.43-1.06) | 0.77 (0.49-1.20) | 0.51    |
| <b>Colon cancer</b>               |           |                  |                  |                  |                  |         |
| Events                            | 153       | 164              | 177              | 158              | 129              |         |
| Person-years                      | 199352    | 201355           | 201219           | 201962           | 202831           |         |
| HR (95% CI), Model 1              | Reference | 1.02 (0.82-1.28) | 1.08 (0.87-1.34) | 0.96 (0.76-1.20) | 0.77 (0.61-0.97) | 0.0480  |
| HR (95% CI), Model 2              | Reference | 1.06 (0.85-1.32) | 1.13 (0.91-1.41) | 1.01 (0.81-1.26) | 0.83 (0.65-1.05) | 0.0993  |
| <b>Ovarian cancer<sup>§</sup></b> |           |                  |                  |                  |                  |         |
| Events                            | 41        | 51               | 39               | 38               | 52               |         |
| Person-years                      | 100614    | 114245           | 119945           | 126580           | 134165           |         |

|                              |           |                  |                  |                  |                  |         |
|------------------------------|-----------|------------------|------------------|------------------|------------------|---------|
| HR (95% CI), Model 1         | Reference | 1.04 (0.69-1.57) | 0.74 (0.48-1.15) | 0.67 (0.43-1.04) | 0.83 (0.55-1.26) | 0.19    |
| HR (95% CI), Model 2         | Reference | 1.06 (0.70-1.60) | 0.75 (0.48-1.17) | 0.68 (0.43-1.06) | 0.85 (0.56-1.29) | 0.21    |
| Breast cancer <sup>§</sup>   |           |                  |                  |                  |                  |         |
| Events                       | 371       | 363              | 395              | 362              | 415              |         |
| Person-years                 | 94298     | 107806           | 113092           | 119416           | 125822           |         |
| HR (95% CI), Model 1         | Reference | 0.84 (0.73-0.97) | 0.86 (0.75-1.00) | 0.74 (0.64-0.86) | 0.80 (0.70-0.92) | 0.0015  |
| HR (95% CI), Model 2         | Reference | 0.85 (0.74-0.99) | 0.88 (0.77-1.02) | 0.77 (0.66-0.89) | 0.83 (0.72-0.96) | 0.0081  |
| Prostate cancer <sup>¶</sup> |           |                  |                  |                  |                  |         |
| Events                       | 446       | 446              | 472              | 383              | 334              |         |
| Person-years                 | 108177    | 94742            | 89378            | 83710            | 76755            |         |
| HR (95% CI), Model 1         | Reference | 1.07 (0.93-1.22) | 1.16 (1.02-1.32) | 0.99 (0.86-1.14) | 0.93 (0.81-1.07) | 0.0234  |
| HR (95% CI), Model 2         | Reference | 1.05 (0.92-1.19) | 1.13 (0.99-1.28) | 0.97 (0.84-1.11) | 0.90 (0.78-1.04) | 0.0266  |
| Other cancers                |           |                  |                  |                  |                  |         |
| Events                       | 1166      | 1060             | 1016             | 987              | 960              |         |
| Person-years                 | 184373    | 187973           | 187956           | 188854           | 189471           |         |
| HR (95% CI), Model 1         | Reference | 0.85 (0.78-0.93) | 0.80 (0.73-0.87) | 0.76 (0.70-0.83) | 0.73 (0.67-0.80) | <0.0001 |
| HR (95% CI), Model 2         | Reference | 0.88 (0.81-0.96) | 0.83 (0.77-0.91) | 0.81 (0.74-0.88) | 0.78 (0.72-0.85) | <0.0001 |
| Depression                   |           |                  |                  |                  |                  |         |
| Events                       | 237       | 202              | 172              | 165              | 219              |         |
| Person-years                 | 188377    | 190894           | 191631           | 192498           | 192269           |         |
| HR (95% CI), Model 1         | Reference | 0.81 (0.67-0.98) | 0.68 (0.56-0.83) | 0.64 (0.52-0.78) | 0.84 (0.69-1.01) | 0.0001  |
| HR (95% CI), Model 2         | Reference | 0.86 (0.71-1.04) | 0.73 (0.60-0.89) | 0.69 (0.57-0.85) | 0.90 (0.74-1.09) | 0.0014  |
| Anxiety                      |           |                  |                  |                  |                  |         |
| Events                       | 623       | 570              | 554              | 546              | 628              |         |
| Person-years                 | 194718    | 196901           | 197133           | 197871           | 197698           |         |
| HR (95% CI), Model 1         | Reference | 0.86 (0.76-0.96) | 0.81 (0.72-0.91) | 0.78 (0.69-0.87) | 0.87 (0.77-0.97) | 0.0002  |
| HR (95% CI), Model 2         | Reference | 0.89 (0.79-1.00) | 0.85 (0.76-0.95) | 0.82 (0.73-0.92) | 0.91 (0.81-1.02) | 0.0109  |
| Schizophrenia                |           |                  |                  |                  |                  |         |
| Events                       | 31        | 23               | 22               | 19               | 20               |         |
| Person-years                 | 200459    | 202047           | 202111           | 202854           | 203472           |         |
| HR (95% CI), Model 1         | Reference | 0.72 (0.42-1.23) | 0.68 (0.39-1.17) | 0.57 (0.32-1.01) | 0.58 (0.33-1.03) | 0.27    |
| HR (95% CI), Model 2         | Reference | 0.80 (0.46-1.37) | 0.77 (0.44-1.34) | 0.67 (0.37-1.19) | 0.70 (0.39-1.24) | 0.65    |
| Alcohol use disorder         |           |                  |                  |                  |                  |         |
| Events                       | 292       | 167              | 122              | 112              | 62               |         |
| Person-years                 | 198894    | 201402           | 201830           | 202589           | 203446           |         |
| HR (95% CI), Model 1         | Reference | 0.58 (0.48-0.71) | 0.43 (0.35-0.53) | 0.40 (0.32-0.50) | 0.22 (0.17-0.30) | <0.0001 |
| HR (95% CI), Model 2         | Reference | 0.62 (0.51-0.75) | 0.47 (0.38-0.58) | 0.45 (0.36-0.56) | 0.26 (0.20-0.34) | <0.0001 |
| Psychoactive substance abuse |           |                  |                  |                  |                  |         |
| Events                       | 58        | 34               | 17               | 20               | 16               |         |
| Person-years                 | 200532    | 202425           | 202551           | 203294           | 203817           |         |
| HR (95% CI), Model 1         | Reference | 0.61 (0.40-0.93) | 0.31 (0.18-0.54) | 0.37 (0.22-0.63) | 0.31 (0.18-0.54) | <0.0001 |
| HR (95% CI), Model 2         | Reference | 0.67 (0.44-1.03) | 0.35 (0.20-0.60) | 0.43 (0.26-0.72) | 0.36 (0.20-0.63) | <0.0001 |
| Epilepsy                     |           |                  |                  |                  |                  |         |
| Events                       | 93        | 69               | 78               | 56               | 70               |         |

|                              |           |                  |                  |                  |                  |         |
|------------------------------|-----------|------------------|------------------|------------------|------------------|---------|
| Person-years                 | 199349    | 201165           | 200999           | 201892           | 202336           |         |
| HR (95% CI), Model 1         | Reference | 0.72 (0.53-0.98) | 0.80 (0.59-1.09) | 0.57 (0.41-0.80) | 0.71 (0.52-0.98) | 0.0190  |
| HR (95% CI), Model 2         | Reference | 0.74 (0.54-1.01) | 0.83 (0.61-1.13) | 0.60 (0.43-0.84) | 0.75 (0.55-1.04) | 0.0423  |
| <b>Migraine</b>              |           |                  |                  |                  |                  |         |
| Events                       | 137       | 119              | 132              | 129              | 127              |         |
| Person-years                 | 194886    | 196072           | 195558           | 195500           | 195668           |         |
| HR (95% CI), Model 1         | Reference | 0.83 (0.65-1.06) | 0.91 (0.72-1.16) | 0.88 (0.69-1.12) | 0.85 (0.66-1.08) | 0.59    |
| HR (95% CI), Model 2         | Reference | 0.84 (0.66-1.07) | 0.93 (0.73-1.18) | 0.89 (0.70-1.14) | 0.86 (0.67-1.09) | 0.64    |
| <b>Dementia</b>              |           |                  |                  |                  |                  |         |
| Events                       | 159       | 122              | 133              | 114              | 145              |         |
| Person-years                 | 200569    | 202463           | 202485           | 203224           | 203686           |         |
| HR (95% CI), Model 1         | Reference | 0.70 (0.55-0.89) | 0.72 (0.58-0.91) | 0.61 (0.48-0.77) | 0.74 (0.59-0.94) | 0.0009  |
| HR (95% CI), Model 2         | Reference | 0.71 (0.56-0.90) | 0.74 (0.58-0.93) | 0.61 (0.48-0.78) | 0.75 (0.59-0.94) | 0.0016  |
| <b>Parkinson's disease</b>   |           |                  |                  |                  |                  |         |
| Events                       | 83        | 78               | 69               | 80               | 79               |         |
| Person-years                 | 200607    | 202318           | 202253           | 202965           | 203711           |         |
| HR (95% CI), Model 1         | Reference | 0.90 (0.66-1.22) | 0.77 (0.56-1.06) | 0.90 (0.66-1.22) | 0.88 (0.64-1.20) | 0.64    |
| HR (95% CI), Model 2         | Reference | 0.89 (0.65-1.21) | 0.76 (0.55-1.05) | 0.88 (0.64-1.19) | 0.85 (0.62-1.17) | 0.57    |
| <b>Multiple sclerosis</b>    |           |                  |                  |                  |                  |         |
| Events                       | 15        | 34               | 18               | 13               | 14               |         |
| Person-years                 | 200096    | 201869           | 202069           | 202794           | 203244           |         |
| HR (95% CI), Model 1         | Reference | 2.22 (1.21-4.08) | 1.17 (0.59-2.33) | 0.84 (0.40-1.77) | 0.89 (0.43-1.86) | 0.0040  |
| HR (95% CI), Model 2         | Reference | 2.31 (1.25-4.24) | 1.23 (0.62-2.46) | 0.90 (0.42-1.89) | 0.97 (0.46-2.03) | 0.0050  |
| <b>Bronchiectasis</b>        |           |                  |                  |                  |                  |         |
| Events                       | 157       | 134              | 115              | 113              | 129              |         |
| Person-years                 | 199976    | 201808           | 201833           | 202449           | 203193           |         |
| HR (95% CI), Model 1         | Reference | 0.77 (0.61-0.97) | 0.63 (0.49-0.80) | 0.59 (0.47-0.76) | 0.65 (0.51-0.82) | 0.0001  |
| HR (95% CI), Model 2         | Reference | 0.79 (0.63-1.00) | 0.65 (0.51-0.82) | 0.61 (0.48-0.79) | 0.66 (0.52-0.83) | 0.0002  |
| <b>Asthma</b>                |           |                  |                  |                  |                  |         |
| Events                       | 386       | 317              | 322              | 325              | 306              |         |
| Person-years                 | 171799    | 174318           | 175545           | 175909           | 177223           |         |
| HR (95% CI), Model 1         | Reference | 0.78 (0.67-0.91) | 0.77 (0.67-0.90) | 0.77 (0.66-0.89) | 0.71 (0.61-0.82) | 0.0001  |
| HR (95% CI), Model 2         | Reference | 0.82 (0.70-0.95) | 0.82 (0.70-0.95) | 0.82 (0.70-0.95) | 0.75 (0.64-0.88) | 0.0038  |
| <b>COPD</b>                  |           |                  |                  |                  |                  |         |
| Events                       | 465       | 362              | 353              | 298              | 276              |         |
| Person-years                 | 196806    | 198859           | 199420           | 200516           | 201113           |         |
| HR (95% CI), Model 1         | Reference | 0.73 (0.64-0.84) | 0.69 (0.60-0.79) | 0.58 (0.50-0.67) | 0.52 (0.45-0.61) | <0.0001 |
| HR (95% CI), Model 2         | Reference | 0.83 (0.73-0.96) | 0.81 (0.71-0.94) | 0.71 (0.61-0.82) | 0.66 (0.57-0.77) | <0.0001 |
| <b>CKD</b>                   |           |                  |                  |                  |                  |         |
| Events                       | 901       | 887              | 790              | 752              | 728              |         |
| Person-years                 | 197000    | 198486           | 199168           | 200487           | 200685           |         |
| HR (95% CI), Model 1         | Reference | 0.94 (0.85-1.03) | 0.80 (0.73-0.88) | 0.76 (0.69-0.83) | 0.72 (0.65-0.80) | <0.0001 |
| HR (95% CI), Model 2         | Reference | 0.99 (0.90-1.09) | 0.87 (0.79-0.96) | 0.83 (0.75-0.91) | 0.80 (0.73-0.89) | <0.0001 |
| <b>Chronic liver disease</b> |           |                  |                  |                  |                  |         |
| Events                       | 62        | 57               | 43               | 39               | 35               |         |

|                            |           |                  |                  |                  |                  |         |
|----------------------------|-----------|------------------|------------------|------------------|------------------|---------|
| Person-years               | 199758    | 201484           | 201741           | 202329           | 203022           |         |
| HR (95% CI), Model 1       | Reference | 0.92 (0.64-1.32) | 0.69 (0.47-1.02) | 0.63 (0.42-0.95) | 0.57 (0.38-0.87) | 0.0289  |
| HR (95% CI), Model 2       | Reference | 1.00 (0.70-1.44) | 0.80 (0.54-1.18) | 0.75 (0.50-1.12) | 0.71 (0.46-1.08) | 0.30    |
| Irritable bowel syndrome   |           |                  |                  |                  |                  |         |
| Events                     | 254       | 225              | 190              | 207              | 224              |         |
| Person-years               | 195353    | 196492           | 197182           | 197302           | 197574           |         |
| HR (95% CI), Model 1       | Reference | 0.82 (0.69-0.99) | 0.67 (0.56-0.81) | 0.71 (0.59-0.86) | 0.74 (0.62-0.89) | 0.0002  |
| HR (95% CI), Model 2       | Reference | 0.86 (0.71-1.02) | 0.70 (0.58-0.85) | 0.75 (0.63-0.91) | 0.79 (0.66-0.95) | 0.0030  |
| Inflammatory bowel disease |           |                  |                  |                  |                  |         |
| Events                     | 97        | 97               | 87               | 89               | 78               |         |
| Person-years               | 198178    | 200167           | 200722           | 201393           | 202195           |         |
| HR (95% CI), Model 1       | Reference | 1.00 (0.75-1.32) | 0.89 (0.67-1.19) | 0.91 (0.68-1.22) | 0.80 (0.59-1.08) | 0.58    |
| HR (95% CI), Model 2       | Reference | 1.03 (0.78-1.37) | 0.93 (0.69-1.24) | 0.95 (0.71-1.27) | 0.82 (0.61-1.11) | 0.64    |
| Treated constipation       |           |                  |                  |                  |                  |         |
| Events                     | 731       | 681              | 630              | 608              | 684              |         |
| Person-years               | 195725    | 198309           | 198284           | 199153           | 199490           |         |
| HR (95% CI), Model 1       | Reference | 0.88 (0.79-0.97) | 0.79 (0.71-0.88) | 0.75 (0.67-0.84) | 0.83 (0.75-0.92) | <0.0001 |
| HR (95% CI), Model 2       | Reference | 0.90 (0.81-0.99) | 0.81 (0.73-0.90) | 0.77 (0.69-0.86) | 0.84 (0.76-0.94) | <0.0001 |
| Dyspepsia                  |           |                  |                  |                  |                  |         |
| Events                     | 2110      | 1983             | 1867             | 1922             | 1933             |         |
| Person-years               | 168531    | 172416           | 174562           | 174771           | 175249           |         |
| HR (95% CI), Model 1       | Reference | 0.89 (0.83-0.94) | 0.81 (0.76-0.86) | 0.82 (0.77-0.87) | 0.81 (0.76-0.86) | <0.0001 |
| HR (95% CI), Model 2       | Reference | 0.91 (0.86-0.97) | 0.84 (0.79-0.89) | 0.86 (0.81-0.92) | 0.85 (0.80-0.90) | <0.0001 |
| Diverticular disease       |           |                  |                  |                  |                  |         |
| Events                     | 1764      | 1647             | 1602             | 1524             | 1465             |         |
| Person-years               | 186274    | 188682           | 189878           | 190955           | 192106           |         |
| HR (95% CI), Model 1       | Reference | 0.89 (0.83-0.95) | 0.84 (0.78-0.90) | 0.79 (0.73-0.84) | 0.74 (0.69-0.79) | <0.0001 |
| HR (95% CI), Model 2       | Reference | 0.92 (0.86-0.99) | 0.89 (0.83-0.95) | 0.85 (0.79-0.91) | 0.81 (0.75-0.87) | <0.0001 |
| Pernicious anaemia         |           |                  |                  |                  |                  |         |
| Events                     | 38        | 25               | 29               | 22               | 22               |         |
| Person-years               | 200397    | 202187           | 202289           | 202947           | 203388           |         |
| HR (95% CI), Model 1       | Reference | 0.61 (0.37-1.02) | 0.69 (0.42-1.12) | 0.51 (0.30-0.86) | 0.49 (0.29-0.83) | 0.0411  |
| HR (95% CI), Model 2       | Reference | 0.64 (0.38-1.06) | 0.72 (0.44-1.18) | 0.54 (0.32-0.92) | 0.52 (0.30-0.89) | 0.0841  |
| Fracture                   |           |                  |                  |                  |                  |         |
| Events                     | 154       | 133              | 148              | 149              | 175              |         |
| Person-years               | 199421    | 201325           | 201343           | 202014           | 202423           |         |
| HR (95% CI), Model 1       | Reference | 0.79 (0.62-0.99) | 0.83 (0.66-1.05) | 0.81 (0.65-1.02) | 0.92 (0.74-1.14) | 0.21622 |
| HR (95% CI), Model 2       | Reference | 0.78 (0.62-0.98) | 0.82 (0.65-1.03) | 0.80 (0.64-1.01) | 0.89 (0.71-1.11) | 0.19869 |
| Osteoporosis               |           |                  |                  |                  |                  |         |
| Events                     | 1316      | 1245             | 1215             | 1158             | 1181             |         |
| Person-years               | 178732    | 180860           | 180821           | 180929           | 182064           |         |
| HR (95% CI), Model 1       | Reference | 0.88 (0.81-0.95) | 0.82 (0.76-0.89) | 0.77 (0.71-0.83) | 0.76 (0.70-0.82) | <0.0001 |
| HR (95% CI), Model 2       | Reference | 0.91 (0.85-0.99) | 0.88 (0.81-0.95) | 0.83 (0.77-0.90) | 0.83 (0.76-0.90) | <0.0001 |
| Meniere's disease          |           |                  |                  |                  |                  |         |

|                                 |           |                  |                  |                  |                  |         |
|---------------------------------|-----------|------------------|------------------|------------------|------------------|---------|
| Events                          | 26        | 19               | 10               | 22               | 24               |         |
| Person-years                    | 200357    | 202162           | 202203           | 202752           | 203434           |         |
| HR (95% CI), Model 1            | Reference | 0.71 (0.39-1.28) | 0.37 (0.18-0.76) | 0.80 (0.45-1.42) | 0.86 (0.49-1.51) | 0.10    |
| HR (95% CI), Model 2            | Reference | 0.71 (0.39-1.29) | 0.38 (0.18-0.78) | 0.82 (0.46-1.46) | 0.89 (0.50-1.57) | 0.11    |
| Eczema                          |           |                  |                  |                  |                  |         |
| Events                          | 284       | 231              | 209              | 195              | 213              |         |
| Person-years                    | 191575    | 193782           | 193944           | 194982           | 195050           |         |
| HR (95% CI), Model 1            | Reference | 0.78 (0.66-0.93) | 0.69 (0.58-0.83) | 0.64 (0.53-0.77) | 0.69 (0.58-0.83) | <0.0001 |
| HR (95% CI), Model 2            | Reference | 0.80 (0.67-0.95) | 0.72 (0.60-0.87) | 0.67 (0.56-0.81) | 0.72 (0.60-0.86) | <0.0001 |
| Glaucoma                        |           |                  |                  |                  |                  |         |
| Events                          | 274       | 298              | 285              | 338              | 348              |         |
| Person-years                    | 197921    | 199394           | 199476           | 199945           | 200413           |         |
| HR (95% CI), Model 1            | Reference | 1.03 (0.87-1.21) | 0.95 (0.80-1.12) | 1.11 (0.95-1.31) | 1.12 (0.96-1.32) | 0.17    |
| HR (95% CI), Model 2            | Reference | 1.02 (0.87-1.20) | 0.94 (0.79-1.11) | 1.09 (0.93-1.29) | 1.09 (0.93-1.28) | 0.29    |
| Cataract                        |           |                  |                  |                  |                  |         |
| Events                          | 1426      | 1458             | 1466             | 1541             | 1595             |         |
| Person-years                    | 190409    | 191791           | 191560           | 191782           | 191356           |         |
| HR (95% CI), Model 1            | Reference | 0.92 (0.86-0.99) | 0.88 (0.82-0.95) | 0.90 (0.84-0.97) | 0.90 (0.84-0.97) | 0.0080  |
| HR (95% CI), Model 2            | Reference | 0.94 (0.87-1.01) | 0.90 (0.84-0.97) | 0.92 (0.86-0.99) | 0.91 (0.85-0.98) | 0.0500  |
| AMD                             |           |                  |                  |                  |                  |         |
| Events                          | 243       | 245              | 252              | 259              | 279              |         |
| Person-years                    | 199842    | 201480           | 201539           | 202036           | 202518           |         |
| HR (95% CI), Model 1            | Reference | 0.91 (0.76-1.09) | 0.88 (0.74-1.06) | 0.88 (0.74-1.05) | 0.90 (0.76-1.08) | 0.63    |
| HR (95% CI), Model 2            | Reference | 0.93 (0.78-1.11) | 0.91 (0.76-1.08) | 0.91 (0.76-1.08) | 0.92 (0.77-1.10) | 0.81    |
| Thyroid disorders               |           |                  |                  |                  |                  |         |
| Events                          | 401       | 365              | 432              | 465              | 444              |         |
| Person-years                    | 188945    | 189977           | 189348           | 189131           | 188552           |         |
| HR (95% CI), Model 1            | Reference | 0.84 (0.73-0.97) | 0.97 (0.85-1.11) | 1.02 (0.89-1.17) | 0.94 (0.82-1.08) | 0.0685  |
| HR (95% CI), Model 2            | Reference | 0.87 (0.76-1.00) | 1.02 (0.89-1.17) | 1.08 (0.94-1.24) | 1.02 (0.89-1.17) | 0.0423  |
| Prostate disorders <sup>†</sup> |           |                  |                  |                  |                  |         |
| Events                          | 782       | 711              | 627              | 647              | 543              |         |
| Person-years                    | 101029    | 88425            | 83710            | 77718            | 71051            |         |
| HR (95% CI), Model 1            | Reference | 0.97 (0.87-1.07) | 0.86 (0.78-0.96) | 0.95 (0.86-1.06) | 0.86 (0.77-0.96) | 0.0175  |
| HR (95% CI), Model 2            | Reference | 0.97 (0.88-1.08) | 0.87 (0.78-0.97) | 0.96 (0.87-1.07) | 0.87 (0.78-0.98) | 0.0271  |

AMD, age related macular degeneration; CI, confidence interval; CKD, chronic kidney disease; COPD, chronic obstructive pulmonary disease; HR, hazard ratio.

\*Cox proportional hazard regression models were used to examine associations of the Alternate Healthy Eating Index-2010 (quintiles) with the incidence of individual chronic diseases. The statistical tests were two-sided. Model 1 was adjusted for age and sex; Model 2 was adjusted for Model 1 plus ethnicity, education, income, smoking, alcohol consumption, sleep, physical activity, and GRS for longevity; Model 3 was adjusted for Model 2 and total energy intake.

<sup>†</sup>Cardiovascular disease includes coronary heart disease, heart failure, atrial fibrillation, other cardiac disease, stroke, and peripheral vascular disease.



‡All cancers encompass any type of cancer except for non-melanoma skin cancer.

§These analyses were conducted among women only.

¶These analyses were conducted among men only.

**Table S4. The association between the Healthful Plant-based Diet Index and the incidence of individual chronic diseases**

|                                           | Healthful Plant-based Diet Index |                  |                  |                  |                  | P-value<br>for trend* |
|-------------------------------------------|----------------------------------|------------------|------------------|------------------|------------------|-----------------------|
|                                           | Quintile 1                       | Quintile 2       | Quintile 3       | Quintile 4       | Quintile 5       |                       |
| <b>Cardiovascular disease<sup>†</sup></b> |                                  |                  |                  |                  |                  |                       |
| Events                                    | 2470                             | 663              | 2252             | 1980             | 1560             |                       |
| Person-years                              | 230757                           | 69265            | 240120           | 213020           | 194051           |                       |
| HR (95% CI), Model 1                      | Reference                        | 0.87 (0.80-0.95) | 0.86 (0.81-0.91) | 0.88 (0.83-0.93) | 0.79 (0.74-0.84) | <0.0001               |
| HR (95% CI), Model 2                      | Reference                        | 0.90 (0.82-0.98) | 0.90 (0.85-0.96) | 0.93 (0.87-0.99) | 0.86 (0.80-0.92) | <0.0001               |
| <b>Coronary heart disease</b>             |                                  |                  |                  |                  |                  |                       |
| Events                                    | 1406                             | 366              | 1232             | 1018             | 798              |                       |
| Person-years                              | 240278                           | 72006            | 248623           | 220643           | 200121           |                       |
| HR (95% CI), Model 1                      | Reference                        | 0.86 (0.76-0.96) | 0.85 (0.79-0.92) | 0.83 (0.76-0.90) | 0.75 (0.69-0.82) | <0.0001               |
| HR (95% CI), Model 2                      | Reference                        | 0.89 (0.79-1.00) | 0.90 (0.83-0.97) | 0.89 (0.82-0.96) | 0.83 (0.76-0.91) | 0.0015                |
| <b>Heart failure</b>                      |                                  |                  |                  |                  |                  |                       |
| Events                                    | 437                              | 127              | 398              | 311              | 245              |                       |
| Person-years                              | 248028                           | 73946            | 255500           | 225690           | 204469           |                       |
| HR (95% CI), Model 1                      | Reference                        | 0.95 (0.78-1.15) | 0.87 (0.76-0.99) | 0.79 (0.68-0.92) | 0.72 (0.62-0.85) | 0.0009                |
| HR (95% CI), Model 2                      | Reference                        | 1.00 (0.82-1.22) | 0.95 (0.83-1.09) | 0.88 (0.76-1.03) | 0.85 (0.72-1.00) | 0.28                  |
| <b>Atrial fibrillation</b>                |                                  |                  |                  |                  |                  |                       |
| Events                                    | 513                              | 133              | 459              | 434              | 292              |                       |
| Person-years                              | 244230                           | 72982            | 252387           | 222868           | 202187           |                       |
| HR (95% CI), Model 1                      | Reference                        | 0.86 (0.71-1.04) | 0.87 (0.77-0.99) | 0.98 (0.86-1.12) | 0.79 (0.68-0.91) | 0.0067                |
| HR (95% CI), Model 2                      | Reference                        | 0.88 (0.73-1.07) | 0.93 (0.82-1.05) | 1.06 (0.93-1.21) | 0.88 (0.75-1.02) | 0.0620                |
| <b>Other cardiac disease</b>              |                                  |                  |                  |                  |                  |                       |
| Events                                    | 981                              | 288              | 911              | 769              | 637              |                       |
| Person-years                              | 244750                           | 73086            | 252674           | 223556           | 202529           |                       |
| HR (95% CI), Model 1                      | Reference                        | 0.95 (0.84-1.09) | 0.87 (0.80-0.96) | 0.85 (0.77-0.94) | 0.81 (0.73-0.89) | 0.0003                |
| HR (95% CI), Model 2                      | Reference                        | 0.98 (0.86-1.12) | 0.92 (0.84-1.01) | 0.90 (0.82-1.00) | 0.88 (0.79-0.97) | 0.0998                |
| <b>Stroke</b>                             |                                  |                  |                  |                  |                  |                       |
| Events                                    | 203                              | 51               | 171              | 180              | 114              |                       |
| Person-years                              | 247943                           | 74066            | 255763           | 225624           | 204251           |                       |
| HR (95% CI), Model 1                      | Reference                        | 0.81 (0.60-1.11) | 0.79 (0.64-0.97) | 0.96 (0.78-1.18) | 0.70 (0.55-0.88) | 0.0126                |
| HR (95% CI), Model 2                      | Reference                        | 0.83 (0.61-1.13) | 0.82 (0.67-1.00) | 1.00 (0.82-1.23) | 0.74 (0.58-0.94) | 0.0376                |
| <b>Peripheral vascular disease</b>        |                                  |                  |                  |                  |                  |                       |
| Events                                    | 239                              | 62               | 211              | 198              | 160              |                       |
| Person-years                              | 248376                           | 74130            | 255957           | 226014           | 204470           |                       |
| HR (95% CI), Model 1                      | Reference                        | 0.83 (0.63-1.10) | 0.81 (0.67-0.98) | 0.86 (0.71-1.04) | 0.77 (0.63-0.95) | 0.11                  |
| HR (95% CI), Model 2                      | Reference                        | 0.85 (0.64-1.13) | 0.83 (0.69-1.00) | 0.89 (0.73-1.08) | 0.80 (0.65-0.99) | 0.24                  |
| <b>Hypertension</b>                       |                                  |                  |                  |                  |                  |                       |
| Events                                    | 1089                             | 304              | 1020             | 813              | 656              |                       |
| Person-years                              | 178278                           | 54204            | 189506           | 170878           | 159585           |                       |
| HR (95% CI), Model 1                      | Reference                        | 0.88 (0.78-1.00) | 0.84 (0.77-0.92) | 0.75 (0.68-0.82) | 0.66 (0.59-0.72) | <0.0001               |
| HR (95% CI), Model 2                      | Reference                        | 0.92 (0.81-1.05) | 0.91 (0.83-0.99) | 0.83 (0.75-0.91) | 0.76 (0.69-0.84) | <0.0001               |

|                             |           |                  |                  |                  |                  |         |
|-----------------------------|-----------|------------------|------------------|------------------|------------------|---------|
| Diabetes                    |           |                  |                  |                  |                  |         |
| Events                      | 795       | 210              | 648              | 427              | 371              |         |
| Person-years                | 236759    | 71291            | 246109           | 217844           | 198054           |         |
| HR (95% CI), Model 1        | Reference | 0.86 (0.74-1.01) | 0.78 (0.70-0.87) | 0.59 (0.52-0.66) | 0.58 (0.51-0.65) | <0.0001 |
| HR (95% CI), Model 2        | Reference | 0.96 (0.82-1.11) | 0.92 (0.83-1.02) | 0.73 (0.65-0.83) | 0.79 (0.69-0.90) | <0.0001 |
| All cancers <sup>‡</sup>    |           |                  |                  |                  |                  |         |
| Events                      | 1625      | 458              | 1557             | 1314             | 1095             |         |
| Person-years                | 226058    | 67691            | 233641           | 206340           | 188128           |         |
| HR (95% CI), Model 1        | Reference | 0.90 (0.81-1.00) | 0.87 (0.81-0.94) | 0.82 (0.77-0.89) | 0.76 (0.70-0.82) | <0.0001 |
| HR (95% CI), Model 2        | Reference | 0.92 (0.83-1.02) | 0.90 (0.84-0.97) | 0.86 (0.80-0.93) | 0.81 (0.75-0.88) | <0.0001 |
| Non-melanoma skin cancer    |           |                  |                  |                  |                  |         |
| Events                      | 868       | 280              | 937              | 790              | 684              |         |
| Person-years                | 242689    | 72560            | 249674           | 220721           | 199893           |         |
| HR (95% CI), Model 1        | Reference | 1.04 (0.91-1.19) | 1.01 (0.92-1.11) | 0.98 (0.89-1.08) | 0.96 (0.87-1.07) | 0.79    |
| HR (95% CI), Model 2        | Reference | 1.03 (0.90-1.17) | 0.98 (0.90-1.08) | 0.94 (0.85-1.04) | 0.91 (0.82-1.01) | 0.32    |
| Melanoma                    |           |                  |                  |                  |                  |         |
| Events                      | 121       | 36               | 132              | 94               | 102              |         |
| Person-years                | 247378    | 73698            | 254481           | 224213           | 203066           |         |
| HR (95% CI), Model 1        | Reference | 0.97 (0.67-1.41) | 1.03 (0.80-1.32) | 0.83 (0.63-1.10) | 1.02 (0.77-1.34) | 0.57    |
| HR (95% CI), Model 2        | Reference | 0.97 (0.67-1.41) | 1.02 (0.80-1.31) | 0.83 (0.63-1.09) | 1.01 (0.76-1.33) | 0.57    |
| Lung cancer                 |           |                  |                  |                  |                  |         |
| Events                      | 161       | 61               | 148              | 131              | 108              |         |
| Person-years                | 249099    | 74221            | 256530           | 226530           | 204976           |         |
| HR (95% CI), Model 1        | Reference | 1.19 (0.88-1.60) | 0.81 (0.65-1.02) | 0.79 (0.63-1.01) | 0.72 (0.56-0.93) | 0.0079  |
| HR (95% CI), Model 2        | Reference | 1.27 (0.94-1.70) | 0.87 (0.69-1.09) | 0.87 (0.69-1.11) | 0.82 (0.63-1.05) | 0.0577  |
| Stomach cancer              |           |                  |                  |                  |                  |         |
| Events                      | 41        | 8                | 42               | 29               | 25               |         |
| Person-years                | 249633    | 74476            | 257082           | 226906           | 205328           |         |
| HR (95% CI), Model 1        | Reference | 0.66 (0.31-1.41) | 1.05 (0.68-1.61) | 0.88 (0.54-1.42) | 0.91 (0.54-1.52) | 0.78    |
| HR (95% CI), Model 2        | Reference | 0.69 (0.32-1.48) | 1.12 (0.73-1.73) | 0.96 (0.59-1.56) | 1.03 (0.61-1.73) | 0.80    |
| Oesophageal cancer          |           |                  |                  |                  |                  |         |
| Events                      | 59        | 11               | 48               | 41               | 35               |         |
| Person-years                | 249529    | 74468            | 257003           | 226936           | 205331           |         |
| HR (95% CI), Model 1        | Reference | 0.61 (0.32-1.17) | 0.79 (0.54-1.16) | 0.79 (0.53-1.19) | 0.80 (0.52-1.23) | 0.52    |
| HR (95% CI), Model 2        | Reference | 0.66 (0.35-1.25) | 0.88 (0.60-1.29) | 0.91 (0.61-1.37) | 0.97 (0.62-1.51) | 0.76    |
| Colon cancer                |           |                  |                  |                  |                  |         |
| Events                      | 220       | 56               | 210              | 176              | 119              |         |
| Person-years                | 247684    | 73914            | 255151           | 225589           | 204381           |         |
| HR (95% CI), Model 1        | Reference | 0.83 (0.62-1.11) | 0.90 (0.75-1.09) | 0.87 (0.71-1.06) | 0.67 (0.53-0.84) | 0.0169  |
| HR (95% CI), Model 2        | Reference | 0.85 (0.64-1.14) | 0.94 (0.77-1.14) | 0.91 (0.74-1.12) | 0.72 (0.57-0.91) | 0.0763  |
| Ovarian cancer <sup>§</sup> |           |                  |                  |                  |                  |         |
| Events                      | 51        | 20               | 61               | 50               | 39               |         |
| Person-years                | 113280    | 38737            | 148175           | 147597           | 147761           |         |
| HR (95% CI), Model 1        | Reference | 1.12 (0.67-1.88) | 0.88 (0.61-1.28) | 0.72 (0.49-1.07) | 0.57 (0.37-0.87) | 0.0428  |

|                              |           |                  |                  |                  |                  |         |
|------------------------------|-----------|------------------|------------------|------------------|------------------|---------|
| HR (95% CI), Model 2         | Reference | 1.16 (0.69-1.95) | 0.92 (0.63-1.34) | 0.77 (0.52-1.15) | 0.63 (0.41-0.96) | 0.12    |
| Breast cancer <sup>§</sup>   |           |                  |                  |                  |                  |         |
| Events                       | 381       | 132              | 479              | 480              | 434              |         |
| Person-years                 | 106699    | 36683            | 139329           | 138560           | 139162           |         |
| HR (95% CI), Model 1         | Reference | 1.00 (0.82-1.22) | 0.95 (0.83-1.09) | 0.96 (0.84-1.10) | 0.87 (0.75-1.00) | 0.31    |
| HR (95% CI), Model 2         | Reference | 1.02 (0.83-1.24) | 0.98 (0.85-1.12) | 1.00 (0.87-1.15) | 0.91 (0.79-1.06) | 0.66    |
| Prostate cancer <sup>¶</sup> |           |                  |                  |                  |                  |         |
| Events                       | 621       | 163              | 573              | 443              | 281              |         |
| Person-years                 | 145725    | 38474            | 117898           | 86702            | 63963            |         |
| HR (95% CI), Model 1         | Reference | 0.95 (0.80-1.13) | 1.07 (0.95-1.19) | 1.12 (0.99-1.27) | 0.96 (0.83-1.11) | 0.15    |
| HR (95% CI), Model 2         | Reference | 0.94 (0.79-1.12) | 1.04 (0.93-1.17) | 1.09 (0.97-1.24) | 0.93 (0.80-1.07) | 0.18    |
| Other cancers                |           |                  |                  |                  |                  |         |
| Events                       | 1411      | 398              | 1317             | 1117             | 946              |         |
| Person-years                 | 230254    | 69087            | 237832           | 210347           | 191108           |         |
| HR (95% CI), Model 1         | Reference | 0.90 (0.80-1.00) | 0.85 (0.78-0.91) | 0.80 (0.74-0.87) | 0.75 (0.69-0.82) | <0.0001 |
| HR (95% CI), Model 2         | Reference | 0.92 (0.82-1.02) | 0.88 (0.81-0.94) | 0.84 (0.77-0.91) | 0.80 (0.73-0.87) | <0.0001 |
| Depression                   |           |                  |                  |                  |                  |         |
| Events                       | 259       | 85               | 250              | 244              | 157              |         |
| Person-years                 | 234715    | 70218            | 242202           | 214221           | 194314           |         |
| HR (95% CI), Model 1         | Reference | 1.06 (0.83-1.36) | 0.88 (0.74-1.05) | 0.94 (0.79-1.12) | 0.65 (0.53-0.79) | 0.0002  |
| HR (95% CI), Model 2         | Reference | 1.13 (0.88-1.44) | 0.96 (0.80-1.14) | 1.04 (0.87-1.25) | 0.74 (0.60-0.91) | 0.0062  |
| Anxiety                      |           |                  |                  |                  |                  |         |
| Events                       | 740       | 222              | 755              | 656              | 548              |         |
| Person-years                 | 242190    | 72401            | 249546           | 220518           | 199666           |         |
| HR (95% CI), Model 1         | Reference | 0.96 (0.82-1.11) | 0.91 (0.82-1.01) | 0.86 (0.77-0.96) | 0.77 (0.69-0.86) | 0.0002  |
| HR (95% CI), Model 2         | Reference | 0.99 (0.85-1.15) | 0.96 (0.87-1.07) | 0.92 (0.83-1.03) | 0.84 (0.75-0.95) | 0.0455  |
| Schizophrenia                |           |                  |                  |                  |                  |         |
| Events                       | 26        | 8                | 35               | 29               | 17               |         |
| Person-years                 | 249085    | 74304            | 256375           | 226368           | 204812           |         |
| HR (95% CI), Model 1         | Reference | 1.07 (0.48-2.37) | 1.38 (0.83-2.31) | 1.34 (0.78-2.31) | 0.91 (0.48-1.71) | 0.51    |
| HR (95% CI), Model 2         | Reference | 1.19 (0.54-2.64) | 1.62 (0.97-2.72) | 1.67 (0.96-2.88) | 1.22 (0.64-2.31) | 0.29    |
| Alcohol use disorder         |           |                  |                  |                  |                  |         |
| Events                       | 233       | 66               | 213              | 141              | 102              |         |
| Person-years                 | 247877    | 74017            | 255560           | 226055           | 204653           |         |
| HR (95% CI), Model 1         | Reference | 1.00 (0.76-1.31) | 0.98 (0.81-1.18) | 0.79 (0.63-0.97) | 0.68 (0.53-0.87) | 0.0065  |
| HR (95% CI), Model 2         | Reference | 1.02 (0.78-1.34) | 1.01 (0.84-1.22) | 0.83 (0.67-1.02) | 0.73 (0.57-0.93) | 0.0333  |
| Psychoactive substance abuse |           |                  |                  |                  |                  |         |
| Events                       | 40        | 16               | 39               | 26               | 24               |         |
| Person-years                 | 249369    | 74442            | 256781           | 226842           | 205185           |         |
| HR (95% CI), Model 1         | Reference | 1.41 (0.79-2.52) | 1.04 (0.66-1.62) | 0.83 (0.50-1.37) | 0.89 (0.52-1.50) | 0.54    |
| HR (95% CI), Model 2         | Reference | 1.49 (0.83-2.67) | 1.12 (0.71-1.75) | 0.91 (0.55-1.52) | 1.01 (0.59-1.72) | 0.61    |
| Epilepsy                     |           |                  |                  |                  |                  |         |
| Events                       | 104       | 26               | 96               | 86               | 54               |         |
| Person-years                 | 247657    | 73859            | 254924           | 225458           | 203844           |         |

|                       |           |                  |                  |                  |                  |         |
|-----------------------|-----------|------------------|------------------|------------------|------------------|---------|
| HR (95% CI), Model 1  | Reference | 0.81 (0.52-1.24) | 0.85 (0.64-1.13) | 0.85 (0.63-1.14) | 0.59 (0.42-0.82) | 0.0487  |
| HR (95% CI), Model 2  | Reference | 0.82 (0.53-1.26) | 0.87 (0.66-1.16) | 0.88 (0.66-1.18) | 0.62 (0.44-0.87) | 0.10    |
| Migraine              |           |                  |                  |                  |                  |         |
| Events                | 155       | 43               | 153              | 159              | 134              |         |
| Person-years          | 241706    | 72074            | 248146           | 218349           | 197411           |         |
| HR (95% CI), Model 1  | Reference | 0.88 (0.63-1.23) | 0.87 (0.69-1.09) | 0.97 (0.77-1.21) | 0.85 (0.67-1.08) | 0.59    |
| HR (95% CI), Model 2  | Reference | 0.89 (0.63-1.24) | 0.88 (0.70-1.10) | 0.98 (0.78-1.23) | 0.86 (0.67-1.10) | 0.65    |
| Dementia              |           |                  |                  |                  |                  |         |
| Events                | 164       | 51               | 183              | 155              | 120              |         |
| Person-years          | 249393    | 74375            | 256771           | 226734           | 205154           |         |
| HR (95% CI), Model 1  | Reference | 0.97 (0.71-1.33) | 0.99 (0.80-1.22) | 0.94 (0.75-1.18) | 0.83 (0.65-1.06) | 0.59    |
| HR (95% CI), Model 2  | Reference | 0.99 (0.72-1.35) | 1.01 (0.82-1.25) | 0.97 (0.77-1.21) | 0.85 (0.66-1.09) | 0.67    |
| Parkinson's disease   |           |                  |                  |                  |                  |         |
| Events                | 91        | 25               | 103              | 94               | 76               |         |
| Person-years          | 249150    | 74407            | 256535           | 226667           | 205095           |         |
| HR (95% CI), Model 1  | Reference | 0.86 (0.55-1.34) | 1.02 (0.77-1.35) | 1.06 (0.79-1.42) | 0.96 (0.70-1.32) | 0.92    |
| HR (95% CI), Model 2  | Reference | 0.86 (0.55-1.34) | 1.01 (0.76-1.35) | 1.04 (0.78-1.40) | 0.95 (0.69-1.31) | 0.92    |
| Multiple sclerosis    |           |                  |                  |                  |                  |         |
| Events                | 19        | 9                | 27               | 20               | 19               |         |
| Person-years          | 248804    | 74234            | 256308           | 226181           | 204545           |         |
| HR (95% CI), Model 1  | Reference | 1.54 (0.70-3.41) | 1.30 (0.72-2.36) | 1.05 (0.55-1.99) | 1.05 (0.54-2.04) | 0.76    |
| HR (95% CI), Model 2  | Reference | 1.59 (0.72-3.53) | 1.36 (0.75-2.47) | 1.12 (0.59-2.14) | 1.15 (0.59-2.25) | 0.76    |
| Bronchiectasis        |           |                  |                  |                  |                  |         |
| Events                | 167       | 41               | 169              | 136              | 135              |         |
| Person-years          | 248618    | 74151            | 255901           | 226051           | 204537           |         |
| HR (95% CI), Model 1  | Reference | 0.75 (0.53-1.06) | 0.86 (0.69-1.07) | 0.75 (0.59-0.94) | 0.81 (0.64-1.02) | 0.12    |
| HR (95% CI), Model 2  | Reference | 0.77 (0.55-1.09) | 0.88 (0.71-1.09) | 0.77 (0.61-0.97) | 0.83 (0.65-1.05) | 0.21    |
| Asthma                |           |                  |                  |                  |                  |         |
| Events                | 422       | 117              | 431              | 377              | 309              |         |
| Person-years          | 213844    | 63921            | 221707           | 196689           | 178634           |         |
| HR (95% CI), Model 1  | Reference | 0.90 (0.74-1.11) | 0.94 (0.82-1.08) | 0.91 (0.79-1.05) | 0.82 (0.70-0.95) | 0.13    |
| HR (95% CI), Model 2  | Reference | 0.94 (0.77-1.16) | 1.01 (0.88-1.15) | 0.99 (0.86-1.14) | 0.91 (0.78-1.06) | 0.68    |
| COPD                  |           |                  |                  |                  |                  |         |
| Events                | 515       | 144              | 463              | 366              | 266              |         |
| Person-years          | 244685    | 73136            | 252621           | 223649           | 202622           |         |
| HR (95% CI), Model 1  | Reference | 0.88 (0.73-1.06) | 0.81 (0.71-0.92) | 0.72 (0.63-0.82) | 0.58 (0.50-0.68) | <0.0001 |
| HR (95% CI), Model 2  | Reference | 0.95 (0.79-1.14) | 0.89 (0.79-1.01) | 0.81 (0.70-0.93) | 0.68 (0.58-0.79) | <0.0001 |
| CKD                   |           |                  |                  |                  |                  |         |
| Events                | 1204      | 346              | 1071             | 839              | 598              |         |
| Person-years          | 244213    | 73025            | 252477           | 223545           | 202566           |         |
| HR (95% CI), Model 1  | Reference | 0.91 (0.81-1.02) | 0.80 (0.74-0.87) | 0.70 (0.64-0.77) | 0.56 (0.50-0.62) | <0.0001 |
| HR (95% CI), Model 2  | Reference | 0.96 (0.85-1.08) | 0.87 (0.80-0.95) | 0.79 (0.72-0.86) | 0.65 (0.59-0.72) | <0.0001 |
| Chronic liver disease |           |                  |                  |                  |                  |         |
| Events                | 82        | 17               | 59               | 52               | 26               |         |
| Person-years          | 247994    | 74119            | 255725           | 226095           | 204402           |         |

|                            |           |                  |                  |                  |                  |         |
|----------------------------|-----------|------------------|------------------|------------------|------------------|---------|
| HR (95% CI), Model 1       | Reference | 0.68 (0.40-1.15) | 0.68 (0.49-0.96) | 0.68 (0.48-0.98) | 0.38 (0.24-0.60) | 0.0010  |
| HR (95% CI), Model 2       | Reference | 0.75 (0.44-1.26) | 0.79 (0.56-1.11) | 0.82 (0.57-1.18) | 0.50 (0.31-0.79) | 0.0562  |
| Irritable bowel syndrome   |           |                  |                  |                  |                  |         |
| Events                     | 284       | 89               | 295              | 249              | 183              |         |
| Person-years               | 242015    | 72311            | 249361           | 220311           | 199906           |         |
| HR (95% CI), Model 1       | Reference | 0.98 (0.77-1.25) | 0.90 (0.76-1.06) | 0.81 (0.68-0.96) | 0.62 (0.52-0.76) | 0.0000  |
| HR (95% CI), Model 2       | Reference | 1.02 (0.80-1.29) | 0.95 (0.81-1.12) | 0.87 (0.73-1.04) | 0.69 (0.56-0.83) | 0.0015  |
| Inflammatory bowel disease |           |                  |                  |                  |                  |         |
| Events                     | 130       | 35               | 105              | 95               | 83               |         |
| Person-years               | 246068    | 73622            | 254100           | 225215           | 203650           |         |
| HR (95% CI), Model 1       | Reference | 0.90 (0.62-1.31) | 0.79 (0.61-1.02) | 0.81 (0.62-1.06) | 0.79 (0.59-1.05) | 0.33    |
| HR (95% CI), Model 2       | Reference | 0.92 (0.64-1.34) | 0.81 (0.63-1.05) | 0.84 (0.64-1.10) | 0.82 (0.62-1.10) | 0.53    |
| Treated constipation       |           |                  |                  |                  |                  |         |
| Events                     | 849       | 239              | 859              | 760              | 627              |         |
| Person-years               | 243961    | 72743            | 251231           | 221973           | 201053           |         |
| HR (95% CI), Model 1       | Reference | 0.90 (0.78-1.04) | 0.92 (0.84-1.01) | 0.91 (0.82-1.00) | 0.83 (0.74-0.92) | 0.0148  |
| HR (95% CI), Model 2       | Reference | 0.92 (0.79-1.06) | 0.94 (0.86-1.04) | 0.93 (0.84-1.03) | 0.86 (0.77-0.95) | 0.0891  |
| Dyspepsia                  |           |                  |                  |                  |                  |         |
| Events                     | 2636      | 714              | 2480             | 2132             | 1853             |         |
| Person-years               | 209121    | 62969            | 219655           | 194950           | 178836           |         |
| HR (95% CI), Model 1       | Reference | 0.86 (0.80-0.94) | 0.84 (0.80-0.89) | 0.80 (0.75-0.85) | 0.75 (0.70-0.80) | <0.0001 |
| HR (95% CI), Model 2       | Reference | 0.89 (0.82-0.96) | 0.88 (0.83-0.93) | 0.84 (0.79-0.89) | 0.80 (0.75-0.85) | <0.0001 |
| Diverticular disease       |           |                  |                  |                  |                  |         |
| Events                     | 2199      | 605              | 2021             | 1786             | 1391             |         |
| Person-years               | 231224    | 69432            | 240249           | 212475           | 194516           |         |
| HR (95% CI), Model 1       | Reference | 0.88 (0.81-0.97) | 0.84 (0.79-0.90) | 0.84 (0.78-0.89) | 0.71 (0.66-0.76) | <0.0001 |
| HR (95% CI), Model 2       | Reference | 0.91 (0.83-1.00) | 0.88 (0.83-0.94) | 0.89 (0.83-0.95) | 0.77 (0.72-0.83) | <0.0001 |
| Pernicious anaemia         |           |                  |                  |                  |                  |         |
| Events                     | 47        | 9                | 35               | 29               | 16               |         |
| Person-years               | 248922    | 74302            | 256538           | 226537           | 204908           |         |
| HR (95% CI), Model 1       | Reference | 0.60 (0.30-1.24) | 0.66 (0.42-1.02) | 0.59 (0.37-0.95) | 0.35 (0.20-0.63) | 0.0086  |
| HR (95% CI), Model 2       | Reference | 0.64 (0.31-1.30) | 0.70 (0.45-1.10) | 0.65 (0.40-1.04) | 0.39 (0.22-0.71) | 0.0355  |
| Fracture                   |           |                  |                  |                  |                  |         |
| Events                     | 171       | 51               | 194              | 162              | 181              |         |
| Person-years               | 248026    | 73917            | 255461           | 225381           | 203741           |         |
| HR (95% CI), Model 1       | Reference | 0.92 (0.67-1.25) | 0.97 (0.78-1.19) | 0.87 (0.70-1.09) | 1.06 (0.85-1.31) | 0.49    |
| HR (95% CI), Model 2       | Reference | 0.90 (0.66-1.23) | 0.94 (0.76-1.15) | 0.84 (0.67-1.05) | 0.99 (0.80-1.24) | 0.50    |
| Osteoporosis               |           |                  |                  |                  |                  |         |
| Events                     | 1509      | 462              | 1583             | 1328             | 1233             |         |
| Person-years               | 222926    | 66528            | 228501           | 202324           | 183125           |         |
| HR (95% CI), Model 1       | Reference | 0.96 (0.86-1.06) | 0.93 (0.86-1.00) | 0.85 (0.79-0.92) | 0.86 (0.80-0.93) | 0.0002  |
| HR (95% CI), Model 2       | Reference | 1.01 (0.91-1.12) | 1.00 (0.93-1.08) | 0.94 (0.87-1.02) | 0.99 (0.92-1.07) | 0.45    |
| Meniere's disease          |           |                  |                  |                  |                  |         |
| Events                     | 36        | 2                | 24               | 21               | 18               |         |

|                                 |           |                  |                  |                  |                  |        |
|---------------------------------|-----------|------------------|------------------|------------------|------------------|--------|
| Person-years                    | 249030    | 74360            | 256399           | 226381           | 204737           |        |
| HR (95% CI), Model 1            | Reference | 0.18 (0.04-0.74) | 0.60 (0.36-1.01) | 0.57 (0.33-1.00) | 0.53 (0.29-0.95) | 0.0318 |
| HR (95% CI), Model 2            | Reference | 0.18 (0.04-0.75) | 0.62 (0.37-1.05) | 0.60 (0.34-1.05) | 0.56 (0.31-1.02) | 0.0538 |
| Eczema                          |           |                  |                  |                  |                  |        |
| Events                          | 291       | 106              | 272              | 249              | 214              |        |
| Person-years                    | 237980    | 71170            | 246212           | 217008           | 196961           |        |
| HR (95% CI), Model 1            | Reference | 1.18 (0.95-1.48) | 0.87 (0.73-1.03) | 0.90 (0.75-1.07) | 0.85 (0.71-1.02) | 0.0308 |
| HR (95% CI), Model 2            | Reference | 1.21 (0.97-1.52) | 0.90 (0.76-1.06) | 0.93 (0.78-1.11) | 0.88 (0.73-1.06) | 0.0613 |
| Glaucoma                        |           |                  |                  |                  |                  |        |
| Events                          | 363       | 109              | 386              | 348              | 337              |        |
| Person-years                    | 245749    | 73456            | 252973           | 223176           | 201796           |        |
| HR (95% CI), Model 1            | Reference | 0.95 (0.77-1.18) | 0.97 (0.84-1.12) | 0.99 (0.85-1.15) | 1.08 (0.93-1.26) | 0.63   |
| HR (95% CI), Model 2            | Reference | 0.95 (0.76-1.17) | 0.96 (0.83-1.11) | 0.97 (0.84-1.13) | 1.06 (0.90-1.23) | 0.72   |
| Cataract                        |           |                  |                  |                  |                  |        |
| Events                          | 1784      | 530              | 1911             | 1682             | 1579             |        |
| Person-years                    | 236098    | 70558            | 243030           | 214167           | 193045           |        |
| HR (95% CI), Model 1            | Reference | 0.90 (0.82-0.99) | 0.91 (0.85-0.97) | 0.87 (0.81-0.93) | 0.90 (0.84-0.97) | 0.0016 |
| HR (95% CI), Model 2            | Reference | 0.92 (0.83-1.01) | 0.92 (0.87-0.99) | 0.90 (0.84-0.96) | 0.94 (0.87-1.01) | 0.0256 |
| AMD                             |           |                  |                  |                  |                  |        |
| Events                          | 302       | 78               | 319              | 307              | 272              |        |
| Person-years                    | 248279    | 74131            | 255527           | 225519           | 203959           |        |
| HR (95% CI), Model 1            | Reference | 0.79 (0.61-1.01) | 0.90 (0.77-1.05) | 0.95 (0.80-1.11) | 0.92 (0.78-1.09) | 0.38   |
| HR (95% CI), Model 2            | Reference | 0.80 (0.62-1.02) | 0.91 (0.78-1.07) | 0.97 (0.82-1.14) | 0.95 (0.80-1.13) | 0.45   |
| Thyroid disorders               |           |                  |                  |                  |                  |        |
| Events                          | 488       | 143              | 528              | 494              | 454              |        |
| Person-years                    | 235155    | 69953            | 240316           | 210798           | 189731           |        |
| HR (95% CI), Model 1            | Reference | 0.90 (0.75-1.09) | 0.91 (0.81-1.03) | 0.90 (0.80-1.03) | 0.87 (0.76-0.99) | 0.30   |
| HR (95% CI), Model 2            | Reference | 0.93 (0.77-1.13) | 0.97 (0.85-1.09) | 0.98 (0.86-1.11) | 0.97 (0.85-1.11) | 0.96   |
| Prostate disorders <sup>†</sup> |           |                  |                  |                  |                  |        |
| Events                          | 1077      | 289              | 851              | 657              | 436              |        |
| Person-years                    | 136006    | 35752            | 109616           | 80652            | 59907            |        |
| HR (95% CI), Model 1            | Reference | 0.97 (0.85-1.10) | 0.90 (0.82-0.99) | 0.94 (0.85-1.04) | 0.83 (0.74-0.93) | 0.0204 |
| HR (95% CI), Model 2            | Reference | 0.97 (0.85-1.11) | 0.90 (0.83-0.99) | 0.94 (0.85-1.04) | 0.84 (0.75-0.94) | 0.0317 |

AMD, age related macular degeneration; CI, confidence interval; CKD, chronic kidney disease; COPD, chronic obstructive pulmonary disease; HR, hazard ratio.

\*Cox proportional hazard regression models were used to examine associations of the Healthful Plant-based Diet Index (quintiles) with the incidence of individual chronic diseases. The statistical tests were two-sided. Model 1 was adjusted for age and sex; Model 2 was adjusted for Model 1 plus ethnicity, education, income, smoking, alcohol consumption, sleep, physical activity, and GRS for longevity; Model 3 was adjusted for Model 2 and total energy intake.

<sup>†</sup>Cardiovascular disease includes coronary heart disease, heart failure, atrial fibrillation, other cardiac disease, stroke, and peripheral vascular disease.

<sup>‡</sup>All cancers encompass any type of cancer except for non-melanoma skin cancer.

<sup>§</sup>These analyses were conducted among women only.

<sup>¶</sup>These analyses were conducted among men only.



**Table S5. The association between the Alternate Mediterranean Diet Index and the incidence of individual chronic diseases among individuals by excluding those developed the corresponding disease in the first 4 years of follow-up**

|                                           | Alternate Mediterranean Diet Index |                  |                  |                  |                  | P-value<br>for<br>trend* |
|-------------------------------------------|------------------------------------|------------------|------------------|------------------|------------------|--------------------------|
|                                           | Quintile 1                         | Quintile 2       | Quintile 3       | Quintile 4       | Quintile 5       |                          |
| <b>Cardiovascular disease<sup>†</sup></b> |                                    |                  |                  |                  |                  |                          |
| Events                                    | 1038                               | 967              | 1064             | 886              | 1137             |                          |
| Person-years                              | 172159                             | 168209           | 196005           | 177898           | 224800           |                          |
| HR (95% CI), Model 1                      | Reference                          | 0.93 (0.85-1.01) | 0.86 (0.79-0.94) | 0.80 (0.73-0.87) | 0.80 (0.73-0.87) | <0.0001                  |
| HR (95% CI), Model 2                      | Reference                          | 0.95 (0.87-1.04) | 0.90 (0.82-0.98) | 0.85 (0.78-0.93) | 0.89 (0.81-0.97) | 0.0040                   |
| <b>Coronary heart disease</b>             |                                    |                  |                  |                  |                  |                          |
| Events                                    | 608                                | 566              | 617              | 541              | 649              |                          |
| Person-years                              | 180630                             | 175408           | 204041           | 184491           | 233206           |                          |
| HR (95% CI), Model 1                      | Reference                          | 0.95 (0.85-1.07) | 0.88 (0.79-0.99) | 0.87 (0.78-0.98) | 0.83 (0.75-0.93) | 0.0146                   |
| HR (95% CI), Model 2                      | Reference                          | 0.98 (0.88-1.10) | 0.93 (0.83-1.04) | 0.95 (0.85-1.07) | 0.94 (0.84-1.06) | 0.71                     |
| <b>Heart failure</b>                      |                                    |                  |                  |                  |                  |                          |
| Events                                    | 226                                | 222              | 225              | 196              | 196              |                          |
| Person-years                              | 187405                             | 181128           | 209765           | 189474           | 238850           |                          |
| HR (95% CI), Model 1                      | Reference                          | 0.98 (0.81-1.18) | 0.83 (0.69-1.00) | 0.80 (0.66-0.98) | 0.63 (0.52-0.76) | <0.0001                  |
| HR (95% CI), Model 2                      | Reference                          | 1.03 (0.86-1.24) | 0.90 (0.75-1.09) | 0.91 (0.75-1.10) | 0.76 (0.62-0.92) | 0.0246                   |
| <b>Atrial fibrillation</b>                |                                    |                  |                  |                  |                  |                          |
| Events                                    | 82                                 | 89               | 95               | 71               | 95               |                          |
| Person-years                              | 184546                             | 178235           | 206767           | 186684           | 235412           |                          |
| HR (95% CI), Model 1                      | Reference                          | 1.09 (0.80-1.47) | 0.98 (0.73-1.32) | 0.82 (0.60-1.13) | 0.85 (0.63-1.15) | 0.35                     |
| HR (95% CI), Model 2                      | Reference                          | 1.12 (0.83-1.51) | 1.02 (0.76-1.38) | 0.88 (0.64-1.21) | 0.96 (0.70-1.30) | 0.64                     |
| <b>Other cardiac disease</b>              |                                    |                  |                  |                  |                  |                          |
| Events                                    | 564                                | 508              | 550              | 437              | 568              |                          |
| Person-years                              | 184780                             | 178562           | 207280           | 187608           | 236238           |                          |
| HR (95% CI), Model 1                      | Reference                          | 0.91 (0.80-1.02) | 0.83 (0.73-0.93) | 0.73 (0.64-0.82) | 0.74 (0.66-0.83) | <0.0001                  |
| HR (95% CI), Model 2                      | Reference                          | 0.94 (0.83-1.06) | 0.88 (0.78-0.99) | 0.79 (0.70-0.90) | 0.84 (0.74-0.95) | 0.0027                   |
| <b>Stroke</b>                             |                                    |                  |                  |                  |                  |                          |
| Events                                    | 35                                 | 34               | 40               | 38               | 40               |                          |
| Person-years                              | 187431                             | 181125           | 209690           | 189455           | 238788           |                          |
| HR (95% CI), Model 1                      | Reference                          | 0.97 (0.61-1.56) | 0.96 (0.61-1.52) | 1.01 (0.64-1.60) | 0.83 (0.52-1.31) | 0.91                     |
| HR (95% CI), Model 2                      | Reference                          | 1.00 (0.62-1.60) | 1.00 (0.64-1.58) | 1.07 (0.67-1.71) | 0.90 (0.56-1.43) | 0.96                     |
| <b>Peripheral vascular disease</b>        |                                    |                  |                  |                  |                  |                          |
| Events                                    | 127                                | 126              | 119              | 109              | 124              |                          |
| Person-years                              | 187819                             | 181513           | 210159           | 189977           | 238878           |                          |
| HR (95% CI), Model 1                      | Reference                          | 1.00 (0.78-1.28) | 0.80 (0.62-1.03) | 0.81 (0.63-1.05) | 0.72 (0.56-0.93) | 0.0358                   |
| HR (95% CI), Model 2                      | Reference                          | 1.03 (0.81-1.32) | 0.84 (0.65-1.08) | 0.87 (0.67-1.12) | 0.79 (0.61-1.02) | 0.19                     |
| <b>Hypertension</b>                       |                                    |                  |                  |                  |                  |                          |
| Events                                    | 213                                | 172              | 222              | 174              | 201              |                          |
| Person-years                              | 134014                             | 131276           | 154122           | 142527           | 182756           |                          |
| HR (95% CI), Model 1                      | Reference                          | 0.81 (0.66-0.99) | 0.87 (0.72-1.05) | 0.74 (0.60-0.90) | 0.65 (0.54-0.80) | 0.0004                   |

|                                   |           |                  |                  |                  |                  |         |
|-----------------------------------|-----------|------------------|------------------|------------------|------------------|---------|
| HR (95% CI), Model 2              | Reference | 0.84 (0.69-1.03) | 0.93 (0.77-1.13) | 0.83 (0.68-1.01) | 0.78 (0.64-0.95) | 0.1040  |
| <b>Diabetes</b>                   |           |                  |                  |                  |                  |         |
| Events                            | 352       | 353              | 329              | 257              | 293              |         |
| Person-years                      | 178581    | 172977           | 201799           | 182874           | 231872           |         |
| HR (95% CI), Model 1              | Reference | 1.03 (0.89-1.19) | 0.82 (0.70-0.95) | 0.71 (0.60-0.84) | 0.64 (0.55-0.75) | <0.0001 |
| HR (95% CI), Model 2              | Reference | 1.16 (1.00-1.34) | 0.95 (0.82-1.11) | 0.91 (0.77-1.07) | 0.92 (0.78-1.08) | 0.0141  |
| <b>All cancers<sup>‡</sup></b>    |           |                  |                  |                  |                  |         |
| Events                            | 769       | 682              | 749              | 640              | 801              |         |
| Person-years                      | 169590    | 164393           | 191675           | 172960           | 218258           |         |
| HR (95% CI), Model 1              | Reference | 0.88 (0.80-0.98) | 0.81 (0.73-0.89) | 0.76 (0.68-0.84) | 0.73 (0.66-0.81) | <0.0001 |
| HR (95% CI), Model 2              | Reference | 0.90 (0.82-1.00) | 0.84 (0.76-0.93) | 0.80 (0.72-0.89) | 0.80 (0.72-0.89) | <0.0001 |
| <b>Non-melanoma skin cancer</b>   |           |                  |                  |                  |                  |         |
| Events                            | 411       | 400              | 465              | 407              | 575              |         |
| Person-years                      | 183558    | 177064           | 204947           | 184753           | 232468           |         |
| HR (95% CI), Model 1              | Reference | 0.98 (0.85-1.12) | 0.96 (0.84-1.10) | 0.94 (0.82-1.08) | 1.04 (0.91-1.18) | 0.60    |
| HR (95% CI), Model 2              | Reference | 0.97 (0.84-1.11) | 0.95 (0.83-1.09) | 0.92 (0.80-1.06) | 1.01 (0.89-1.16) | 0.62    |
| <b>Melanoma</b>                   |           |                  |                  |                  |                  |         |
| Events                            | 59        | 47               | 57               | 54               | 78               |         |
| Person-years                      | 187523    | 180428           | 208958           | 188333           | 237208           |         |
| HR (95% CI), Model 1              | Reference | 0.81 (0.55-1.19) | 0.83 (0.58-1.19) | 0.87 (0.60-1.25) | 0.97 (0.69-1.37) | 0.71    |
| HR (95% CI), Model 2              | Reference | 0.81 (0.55-1.19) | 0.83 (0.58-1.20) | 0.87 (0.60-1.27) | 1.00 (0.70-1.41) | 0.65    |
| <b>Lung cancer</b>                |           |                  |                  |                  |                  |         |
| Events                            | 103       | 70               | 62               | 61               | 71               |         |
| Person-years                      | 188302    | 181819           | 210835           | 190345           | 239554           |         |
| HR (95% CI), Model 1              | Reference | 0.66 (0.49-0.90) | 0.49 (0.35-0.67) | 0.51 (0.37-0.71) | 0.45 (0.33-0.62) | <0.0001 |
| HR (95% CI), Model 2              | Reference | 0.70 (0.52-0.94) | 0.60 (0.45-0.81) | 0.63 (0.46-0.85) | 0.59 (0.44-0.80) | 0.0012  |
| <b>Stomach cancer</b>             |           |                  |                  |                  |                  |         |
| Events                            | 18        | 15               | 17               | 14               | 14               |         |
| Person-years                      | 189076    | 182360           | 211225           | 190679           | 239955           |         |
| HR (95% CI), Model 1              | Reference | 0.86 (0.43-1.71) | 0.85 (0.43-1.64) | 0.79 (0.39-1.59) | 0.63 (0.31-1.28) | 0.80    |
| HR (95% CI), Model 2              | Reference | 0.90 (0.45-1.78) | 0.90 (0.46-1.75) | 0.87 (0.43-1.76) | 0.74 (0.36-1.51) | 0.95    |
| <b>Oesophageal cancer</b>         |           |                  |                  |                  |                  |         |
| Events                            | 32        | 23               | 17               | 12               | 20               |         |
| Person-years                      | 188945    | 182282           | 211241           | 190612           | 240007           |         |
| HR (95% CI), Model 1              | Reference | 0.73 (0.43-1.25) | 0.46 (0.26-0.84) | 0.37 (0.19-0.72) | 0.49 (0.28-0.86) | 0.0095  |
| HR (95% CI), Model 2              | Reference | 0.81 (0.47-1.39) | 0.54 (0.30-0.98) | 0.45 (0.23-0.88) | 0.66 (0.37-1.18) | 0.11    |
| <b>Colon cancer</b>               |           |                  |                  |                  |                  |         |
| Events                            | 97        | 90               | 87               | 94               | 104              |         |
| Person-years                      | 187498    | 180979           | 209795           | 189289           | 238507           |         |
| HR (95% CI), Model 1              | Reference | 0.93 (0.70-1.24) | 0.76 (0.57-1.01) | 0.90 (0.68-1.20) | 0.77 (0.58-1.02) | 0.25    |
| HR (95% CI), Model 2              | Reference | 0.96 (0.72-1.28) | 0.79 (0.59-1.06) | 0.96 (0.72-1.28) | 0.85 (0.64-1.13) | 0.48    |
| <b>Ovarian cancer<sup>§</sup></b> |           |                  |                  |                  |                  |         |
| Events                            | 18        | 20               | 31               | 26               | 34               |         |
| Person-years                      | 95360     | 99785            | 122763           | 118502           | 158965           |         |

|                                     |           |                  |                  |                  |                  |         |
|-------------------------------------|-----------|------------------|------------------|------------------|------------------|---------|
| HR (95% CI), Model 1                | Reference | 1.02 (0.54-1.93) | 1.25 (0.70-2.24) | 1.07 (0.59-1.96) | 1.01 (0.57-1.81) | 0.91    |
| HR (95% CI), Model 2                | Reference | 1.04 (0.55-1.96) | 1.28 (0.71-2.29) | 1.10 (0.60-2.01) | 1.06 (0.59-1.90) | 0.91    |
| <b>Breast cancer<sup>§</sup></b>    |           |                  |                  |                  |                  |         |
| Events                              | 188       | 177              | 210              | 196              | 273              |         |
| Person-years                        | 89471     | 93621            | 115553           | 111400           | 148644           |         |
| HR (95% CI), Model 1                | Reference | 0.89 (0.72-1.09) | 0.84 (0.69-1.03) | 0.81 (0.66-0.99) | 0.83 (0.69-1.00) | 0.25    |
| HR (95% CI), Model 2                | Reference | 0.90 (0.73-1.11) | 0.87 (0.71-1.06) | 0.85 (0.69-1.04) | 0.89 (0.73-1.07) | 0.56    |
| <b>Prostate cancer<sup>¶</sup></b>  |           |                  |                  |                  |                  |         |
| Events                              | 252       | 261              | 263              | 243              | 289              |         |
| Person-years                        | 101940    | 88654            | 95344            | 77966            | 87247            |         |
| HR (95% CI), Model 1                | Reference | 1.13 (0.95-1.35) | 1.03 (0.86-1.22) | 1.14 (0.96-1.36) | 1.17 (0.99-1.39) | 0.27    |
| HR (95% CI), Model 2                | Reference | 1.10 (0.92-1.31) | 0.99 (0.83-1.17) | 1.09 (0.91-1.30) | 1.10 (0.92-1.30) | 0.57    |
| <b>Other cancers</b>                |           |                  |                  |                  |                  |         |
| Events                              | 683       | 593              | 654              | 556              | 692              |         |
| Person-years                        | 172713    | 167932           | 195156           | 176335           | 222347           |         |
| HR (95% CI), Model 1                | Reference | 0.86 (0.77-0.96) | 0.80 (0.72-0.89) | 0.75 (0.67-0.84) | 0.72 (0.65-0.80) | <0.0001 |
| HR (95% CI), Model 2                | Reference | 0.88 (0.79-0.98) | 0.83 (0.74-0.92) | 0.79 (0.70-0.88) | 0.78 (0.70-0.87) | <0.0001 |
| <b>Depression</b>                   |           |                  |                  |                  |                  |         |
| Events                              | 76        | 45               | 50               | 46               | 65               |         |
| Person-years                        | 175905    | 171266           | 199067           | 180023           | 227831           |         |
| HR (95% CI), Model 1                | Reference | 0.59 (0.41-0.85) | 0.56 (0.39-0.79) | 0.55 (0.38-0.80) | 0.60 (0.43-0.84) | 0.0020  |
| HR (95% CI), Model 2                | Reference | 0.62 (0.43-0.90) | 0.60 (0.42-0.86) | 0.62 (0.43-0.90) | 0.70 (0.50-0.99) | 0.0224  |
| <b>Anxiety</b>                      |           |                  |                  |                  |                  |         |
| Events                              | 470       | 370              | 419              | 340              | 461              |         |
| Person-years                        | 182393    | 176651           | 204605           | 185294           | 233418           |         |
| HR (95% CI), Model 1                | Reference | 0.78 (0.68-0.89) | 0.73 (0.64-0.84) | 0.64 (0.55-0.73) | 0.66 (0.58-0.75) | <0.0001 |
| HR (95% CI), Model 2                | Reference | 0.80 (0.70-0.92) | 0.77 (0.67-0.88) | 0.68 (0.59-0.79) | 0.72 (0.63-0.83) | <0.0001 |
| <b>Schizophrenia</b>                |           |                  |                  |                  |                  |         |
| Events                              | 14        | 12               | 13               | 12               | 16               |         |
| Person-years                        | 188635    | 181918           | 210652           | 190109           | 239529           |         |
| HR (95% CI), Model 1                | Reference | 0.86 (0.40-1.86) | 0.79 (0.37-1.68) | 0.79 (0.37-1.73) | 0.82 (0.39-1.69) | 0.97    |
| HR (95% CI), Model 2                | Reference | 0.99 (0.46-2.14) | 0.97 (0.45-2.08) | 1.03 (0.47-2.26) | 1.18 (0.56-2.50) | 0.98    |
| <b>Alcohol use disorder</b>         |           |                  |                  |                  |                  |         |
| Events                              | 140       | 110              | 104              | 87               | 60               |         |
| Person-years                        | 187186    | 181061           | 210047           | 189813           | 239511           |         |
| HR (95% CI), Model 1                | Reference | 0.82 (0.64-1.06) | 0.68 (0.53-0.88) | 0.65 (0.49-0.85) | 0.36 (0.26-0.49) | <0.0001 |
| HR (95% CI), Model 2                | Reference | 0.87 (0.67-1.11) | 0.74 (0.57-0.96) | 0.73 (0.55-0.96) | 0.42 (0.31-0.58) | <0.0001 |
| <b>Psychoactive substance abuse</b> |           |                  |                  |                  |                  |         |
| Events                              | 28        | 20               | 20               | 12               | 15               |         |
| Person-years                        | 188746    | 182087           | 211092           | 190593           | 239995           |         |
| HR (95% CI), Model 1                | Reference | 0.77 (0.43-1.36) | 0.68 (0.38-1.21) | 0.47 (0.24-0.93) | 0.48 (0.26-0.91) | 0.11    |
| HR (95% CI), Model 2                | Reference | 0.86 (0.48-1.53) | 0.80 (0.45-1.42) | 0.58 (0.29-1.16) | 0.65 (0.34-1.24) | 0.55    |
| <b>Epilepsy</b>                     |           |                  |                  |                  |                  |         |
| Events                              | 51        | 37               | 55               | 45               | 46               |         |

|                              |           |                  |                  |                  |                  |         |
|------------------------------|-----------|------------------|------------------|------------------|------------------|---------|
| Person-years                 | 187177    | 181015           | 209362           | 189386           | 238503           |         |
| HR (95% CI), Model 1         | Reference | 0.73 (0.48-1.12) | 0.93 (0.63-1.36) | 0.83 (0.56-1.25) | 0.66 (0.44-1.00) | 0.27    |
| HR (95% CI), Model 2         | Reference | 0.75 (0.49-1.14) | 0.95 (0.64-1.39) | 0.86 (0.57-1.30) | 0.70 (0.47-1.06) | 0.39    |
| <b>Migraine</b>              |           |                  |                  |                  |                  |         |
| Events                       | 85        | 78               | 81               | 72               | 117              |         |
| Person-years                 | 182484    | 176208           | 203706           | 183899           | 230946           |         |
| HR (95% CI), Model 1         | Reference | 0.92 (0.68-1.25) | 0.81 (0.60-1.10) | 0.78 (0.57-1.07) | 0.99 (0.75-1.32) | 0.36    |
| HR (95% CI), Model 2         | Reference | 0.92 (0.68-1.25) | 0.81 (0.60-1.10) | 0.78 (0.57-1.08) | 0.99 (0.74-1.33) | 0.36    |
| <b>Dementia</b>              |           |                  |                  |                  |                  |         |
| Events                       | 120       | 114              | 114              | 95               | 138              |         |
| Person-years                 | 188811    | 182153           | 211014           | 190475           | 239745           |         |
| HR (95% CI), Model 1         | Reference | 0.92 (0.72-1.20) | 0.76 (0.59-0.99) | 0.69 (0.53-0.91) | 0.77 (0.60-0.99) | 0.0421  |
| HR (95% CI), Model 2         | Reference | 0.94 (0.73-1.21) | 0.78 (0.60-1.01) | 0.71 (0.54-0.94) | 0.80 (0.62-1.03) | 0.0894  |
| <b>Parkinson's disease</b>   |           |                  |                  |                  |                  |         |
| Events                       | 56        | 60               | 60               | 61               | 54               |         |
| Person-years                 | 188772    | 182162           | 210718           | 190296           | 239670           |         |
| HR (95% CI), Model 1         | Reference | 1.08 (0.75-1.56) | 0.92 (0.64-1.32) | 1.04 (0.72-1.50) | 0.73 (0.50-1.06) | 0.24    |
| HR (95% CI), Model 2         | Reference | 1.07 (0.74-1.54) | 0.90 (0.62-1.29) | 1.01 (0.70-1.47) | 0.69 (0.47-1.02) | 0.18    |
| <b>Multiple sclerosis</b>    |           |                  |                  |                  |                  |         |
| Events                       | 11        | 10               | 14               | 8                | 8                |         |
| Person-years                 | 188443    | 181911           | 210444           | 189995           | 239190           |         |
| HR (95% CI), Model 1         | Reference | 0.91 (0.39-2.15) | 1.08 (0.49-2.39) | 0.67 (0.27-1.67) | 0.52 (0.21-1.31) | 0.48    |
| HR (95% CI), Model 2         | Reference | 0.98 (0.42-2.32) | 1.21 (0.54-2.68) | 0.77 (0.31-1.95) | 0.63 (0.25-1.62) | 0.66    |
| <b>Bronchiectasis</b>        |           |                  |                  |                  |                  |         |
| Events                       | 104       | 100              | 90               | 72               | 95               |         |
| Person-years                 | 188236    | 181582           | 210256           | 189821           | 238927           |         |
| HR (95% CI), Model 1         | Reference | 0.93 (0.71-1.22) | 0.68 (0.51-0.90) | 0.58 (0.43-0.78) | 0.57 (0.43-0.76) | <0.0001 |
| HR (95% CI), Model 2         | Reference | 0.95 (0.72-1.25) | 0.70 (0.53-0.93) | 0.59 (0.44-0.81) | 0.58 (0.44-0.77) | 0.0001  |
| <b>Asthma</b>                |           |                  |                  |                  |                  |         |
| Events                       | 208       | 168              | 203              | 171              | 225              |         |
| Person-years                 | 159905    | 155822           | 181341           | 164090           | 209685           |         |
| HR (95% CI), Model 1         | Reference | 0.80 (0.65-0.98) | 0.82 (0.67-0.99) | 0.75 (0.61-0.91) | 0.75 (0.62-0.91) | 0.0235  |
| HR (95% CI), Model 2         | Reference | 0.83 (0.68-1.02) | 0.87 (0.71-1.05) | 0.81 (0.66-1.00) | 0.86 (0.70-1.04) | 0.29    |
| <b>COPD</b>                  |           |                  |                  |                  |                  |         |
| Events                       | 318       | 254              | 241              | 198              | 213              |         |
| Person-years                 | 184308    | 178898           | 207612           | 187836           | 236885           |         |
| HR (95% CI), Model 1         | Reference | 0.79 (0.67-0.93) | 0.62 (0.53-0.74) | 0.56 (0.47-0.67) | 0.46 (0.39-0.55) | <0.0001 |
| HR (95% CI), Model 2         | Reference | 0.87 (0.74-1.03) | 0.73 (0.62-0.87) | 0.69 (0.57-0.82) | 0.63 (0.53-0.75) | <0.0001 |
| <b>CKD</b>                   |           |                  |                  |                  |                  |         |
| Events                       | 697       | 575              | 614              | 504              | 556              |         |
| Person-years                 | 183773    | 178398           | 207206           | 187489           | 236354           |         |
| HR (95% CI), Model 1         | Reference | 0.81 (0.73-0.91) | 0.72 (0.65-0.81) | 0.65 (0.58-0.73) | 0.55 (0.49-0.62) | <0.0001 |
| HR (95% CI), Model 2         | Reference | 0.85 (0.76-0.95) | 0.78 (0.70-0.88) | 0.73 (0.65-0.82) | 0.67 (0.60-0.75) | <0.0001 |
| <b>Chronic liver disease</b> |           |                  |                  |                  |                  |         |
| Events                       | 47        | 37               | 30               | 26               | 23               |         |

|                            |           |                  |                  |                  |                  |         |
|----------------------------|-----------|------------------|------------------|------------------|------------------|---------|
| Person-years               | 187806    | 181515           | 210323           | 189492           | 239034           |         |
| HR (95% CI), Model 1       | Reference | 0.83 (0.54-1.28) | 0.59 (0.37-0.93) | 0.58 (0.36-0.94) | 0.42 (0.25-0.69) | 0.0057  |
| HR (95% CI), Model 2       | Reference | 0.92 (0.60-1.42) | 0.69 (0.43-1.09) | 0.73 (0.45-1.19) | 0.59 (0.35-0.99) | 0.23    |
| Irritable bowel syndrome   |           |                  |                  |                  |                  |         |
| Events                     | 189       | 117              | 137              | 151              | 163              |         |
| Person-years               | 183072    | 176781           | 205149           | 185013           | 233124           |         |
| HR (95% CI), Model 1       | Reference | 0.61 (0.48-0.76) | 0.59 (0.47-0.74) | 0.69 (0.56-0.86) | 0.57 (0.46-0.70) | <0.0001 |
| HR (95% CI), Model 2       | Reference | 0.63 (0.50-0.79) | 0.63 (0.50-0.78) | 0.76 (0.61-0.94) | 0.64 (0.52-0.80) | <0.0001 |
| Inflammatory bowel disease |           |                  |                  |                  |                  |         |
| Events                     | 61        | 50               | 62               | 49               | 62               |         |
| Person-years               | 186297    | 180382           | 209089           | 188701           | 237821           |         |
| HR (95% CI), Model 1       | Reference | 0.85 (0.58-1.23) | 0.91 (0.64-1.29) | 0.80 (0.55-1.16) | 0.80 (0.56-1.15) | 0.72    |
| HR (95% CI), Model 2       | Reference | 0.87 (0.60-1.26) | 0.93 (0.65-1.34) | 0.83 (0.57-1.22) | 0.85 (0.59-1.22) | 0.86    |
| Treated constipation       |           |                  |                  |                  |                  |         |
| Events                     | 471       | 388              | 453              | 405              | 521              |         |
| Person-years               | 183361    | 177739           | 206003           | 186872           | 234591           |         |
| HR (95% CI), Model 1       | Reference | 0.82 (0.71-0.93) | 0.80 (0.70-0.91) | 0.78 (0.68-0.89) | 0.78 (0.68-0.88) | 0.0004  |
| HR (95% CI), Model 2       | Reference | 0.83 (0.72-0.95) | 0.82 (0.72-0.93) | 0.80 (0.70-0.92) | 0.81 (0.71-0.93) | 0.0049  |
| Dyspepsia                  |           |                  |                  |                  |                  |         |
| Events                     | 1078      | 1079             | 1161             | 1051             | 1253             |         |
| Person-years               | 154060    | 153103           | 178578           | 162536           | 208234           |         |
| HR (95% CI), Model 1       | Reference | 0.98 (0.90-1.06) | 0.88 (0.81-0.96) | 0.86 (0.79-0.94) | 0.78 (0.72-0.85) | <0.0001 |
| HR (95% CI), Model 2       | Reference | 1.00 (0.92-1.09) | 0.92 (0.84-1.00) | 0.92 (0.84-1.00) | 0.86 (0.79-0.94) | 0.0016  |
| Diverticular disease       |           |                  |                  |                  |                  |         |
| Events                     | 1005      | 911              | 1075             | 851              | 1056             |         |
| Person-years               | 173504    | 169017           | 195341           | 178010           | 225295           |         |
| HR (95% CI), Model 1       | Reference | 0.90 (0.83-0.99) | 0.91 (0.83-0.99) | 0.78 (0.71-0.85) | 0.75 (0.69-0.82) | <0.0001 |
| HR (95% CI), Model 2       | Reference | 0.93 (0.85-1.02) | 0.95 (0.87-1.04) | 0.84 (0.76-0.92) | 0.84 (0.77-0.92) | <0.0001 |
| Pernicious anaemia         |           |                  |                  |                  |                  |         |
| Events                     | 25        | 16               | 19               | 12               | 13               |         |
| Person-years               | 188561    | 181882           | 210821           | 190279           | 239559           |         |
| HR (95% CI), Model 1       | Reference | 0.63 (0.33-1.17) | 0.61 (0.34-1.12) | 0.41 (0.21-0.83) | 0.34 (0.17-0.66) | 0.0161  |
| HR (95% CI), Model 2       | Reference | 0.66 (0.35-1.24) | 0.67 (0.37-1.23) | 0.47 (0.23-0.94) | 0.40 (0.20-0.80) | 0.0791  |
| Fracture                   |           |                  |                  |                  |                  |         |
| Events                     | 98        | 85               | 101              | 99               | 134              |         |
| Person-years               | 187688    | 180941           | 209831           | 189282           | 238241           |         |
| HR (95% CI), Model 1       | Reference | 0.85 (0.63-1.13) | 0.82 (0.62-1.09) | 0.87 (0.65-1.15) | 0.89 (0.68-1.16) | 0.71    |
| HR (95% CI), Model 2       | Reference | 0.85 (0.63-1.13) | 0.82 (0.62-1.09) | 0.86 (0.65-1.14) | 0.85 (0.65-1.12) | 0.68    |
| Osteoporosis               |           |                  |                  |                  |                  |         |
| Events                     | 730       | 657              | 780              | 717              | 848              |         |
| Person-years               | 166188    | 162037           | 187111           | 169016           | 214038           |         |
| HR (95% CI), Model 1       | Reference | 0.88 (0.79-0.97) | 0.86 (0.78-0.96) | 0.86 (0.77-0.95) | 0.77 (0.69-0.85) | <0.0001 |
| HR (95% CI), Model 2       | Reference | 0.91 (0.82-1.01) | 0.93 (0.84-1.02) | 0.95 (0.85-1.05) | 0.91 (0.82-1.00) | 0.31    |
| Meniere's disease          |           |                  |                  |                  |                  |         |

|                                 |           |                  |                  |                  |                  |        |
|---------------------------------|-----------|------------------|------------------|------------------|------------------|--------|
| Events                          | 10        | 7                | 9                | 15               | 16               |        |
| Person-years                    | 188717    | 182046           | 210508           | 190216           | 239331           |        |
| HR (95% CI), Model 1            | Reference | 0.70 (0.27-1.85) | 0.77 (0.31-1.89) | 1.39 (0.62-3.12) | 1.16 (0.52-2.58) | 0.50   |
| HR (95% CI), Model 2            | Reference | 0.74 (0.28-1.94) | 0.83 (0.33-2.05) | 1.57 (0.70-3.54) | 1.40 (0.62-3.18) | 0.35   |
| Eczema                          |           |                  |                  |                  |                  |        |
| Events                          | 188       | 156              | 156              | 149              | 173              |        |
| Person-years                    | 180128    | 174071           | 202110           | 182381           | 229964           |        |
| HR (95% CI), Model 1            | Reference | 0.84 (0.68-1.04) | 0.71 (0.58-0.88) | 0.75 (0.61-0.94) | 0.69 (0.56-0.85) | 0.0033 |
| HR (95% CI), Model 2            | Reference | 0.85 (0.69-1.06) | 0.73 (0.59-0.91) | 0.78 (0.63-0.97) | 0.73 (0.59-0.90) | 0.0216 |
| Glaucoma                        |           |                  |                  |                  |                  |        |
| Events                          | 193       | 211              | 245              | 211              | 277              |        |
| Person-years                    | 186132    | 179134           | 207729           | 187498           | 235725           |        |
| HR (95% CI), Model 1            | Reference | 1.09 (0.90-1.33) | 1.05 (0.87-1.27) | 0.99 (0.82-1.21) | 1.01 (0.84-1.21) | 0.84   |
| HR (95% CI), Model 2            | Reference | 1.08 (0.89-1.31) | 1.04 (0.86-1.26) | 0.97 (0.80-1.19) | 0.97 (0.80-1.18) | 0.77   |
| Cataract                        |           |                  |                  |                  |                  |        |
| Events                          | 943       | 913              | 1032             | 1041             | 1247             |        |
| Person-years                    | 177737    | 171795           | 198609           | 178928           | 224622           |        |
| HR (95% CI), Model 1            | Reference | 0.93 (0.85-1.02) | 0.86 (0.79-0.94) | 0.93 (0.85-1.02) | 0.84 (0.77-0.92) | 0.0006 |
| HR (95% CI), Model 2            | Reference | 0.94 (0.86-1.03) | 0.88 (0.80-0.96) | 0.96 (0.88-1.05) | 0.88 (0.80-0.96) | 0.0097 |
| AMD                             |           |                  |                  |                  |                  |        |
| Events                          | 153       | 172              | 184              | 188              | 226              |        |
| Person-years                    | 187980    | 181016           | 209921           | 189319           | 238320           |        |
| HR (95% CI), Model 1            | Reference | 1.09 (0.88-1.36) | 0.95 (0.77-1.18) | 1.04 (0.84-1.29) | 0.94 (0.76-1.15) | 0.56   |
| HR (95% CI), Model 2            | Reference | 1.12 (0.90-1.39) | 0.98 (0.79-1.22) | 1.08 (0.87-1.34) | 0.99 (0.80-1.22) | 0.64   |
| Thyroid disorders               |           |                  |                  |                  |                  |        |
| Events                          | 285       | 244              | 290              | 264              | 311              |        |
| Person-years                    | 176173    | 170574           | 196824           | 177440           | 223365           |        |
| HR (95% CI), Model 1            | Reference | 0.84 (0.71-1.00) | 0.84 (0.71-0.99) | 0.82 (0.69-0.97) | 0.74 (0.62-0.87) | 0.0078 |
| HR (95% CI), Model 2            | Reference | 0.86 (0.73-1.02) | 0.87 (0.74-1.03) | 0.88 (0.74-1.04) | 0.83 (0.70-0.98) | 0.24   |
| Prostate disorders <sup>†</sup> |           |                  |                  |                  |                  |        |
| Events                          | 464       | 406              | 455              | 384              | 436              |        |
| Person-years                    | 94401     | 82702            | 88940            | 72529            | 80884            |        |
| HR (95% CI), Model 1            | Reference | 0.94 (0.82-1.07) | 0.95 (0.83-1.08) | 0.96 (0.84-1.10) | 0.95 (0.83-1.08) | 0.89   |
| HR (95% CI), Model 2            | Reference | 0.93 (0.82-1.07) | 0.94 (0.83-1.07) | 0.96 (0.83-1.10) | 0.94 (0.82-1.07) | 0.85   |

AMD, age related macular degeneration; CI, confidence interval; CKD, chronic kidney disease; COPD, chronic obstructive pulmonary disease; HR, hazard ratio.

\*Cox proportional hazard regression models were used to examine associations of the Alternate Mediterranean Diet Index (quintiles) with the incidence of individual chronic diseases. The statistical tests were two-sided. Model 1 was adjusted for age and sex; Model 2 was adjusted for Model 1 plus ethnicity, education, income, smoking, alcohol consumption, sleep, physical activity, and GRS for longevity; Model 3 was adjusted for Model 2 and total energy intake.

<sup>†</sup>Cardiovascular disease includes coronary heart disease, heart failure, atrial fibrillation, other cardiac disease, stroke, and peripheral vascular disease.

‡All cancers encompass any type of cancer except for non-melanoma skin cancer.

§These analyses were conducted among women only.

¶These analyses were conducted among men only.

**Table S6. The association between the Anti-Empirical Dietary Inflammatory Index and the incidence of individual chronic diseases among individuals by excluding those developed the corresponding disease in the first 4 years of follow-up**

|                                           | Anti-Empirical Dietary Inflammatory Index |                  |                  |                  |                  | P-value<br>for trend* |
|-------------------------------------------|-------------------------------------------|------------------|------------------|------------------|------------------|-----------------------|
|                                           | Quintile 1                                | Quintile 2       | Quintile 3       | Quintile 4       | Quintile 5       |                       |
| <b>Cardiovascular disease<sup>†</sup></b> |                                           |                  |                  |                  |                  |                       |
| Events                                    | 1024                                      | 1010             | 1036             | 979              | 1043             |                       |
| Person-years                              | 185095                                    | 188136           | 188194           | 188672           | 188974           |                       |
| HR (95% CI), Model 1                      | Reference                                 | 0.90 (0.82-0.98) | 0.88 (0.80-0.96) | 0.79 (0.72-0.86) | 0.81 (0.75-0.89) | <0.0001               |
| HR (95% CI), Model 2                      | Reference                                 | 0.94 (0.86-1.03) | 0.93 (0.85-1.01) | 0.85 (0.78-0.93) | 0.88 (0.81-0.97) | 0.0073                |
| <b>Coronary heart disease</b>             |                                           |                  |                  |                  |                  |                       |
| Events                                    | 631                                       | 614              | 587              | 557              | 592              |                       |
| Person-years                              | 193260                                    | 195525           | 195977           | 196440           | 196574           |                       |
| HR (95% CI), Model 1                      | Reference                                 | 0.89 (0.80-1.00) | 0.81 (0.72-0.90) | 0.73 (0.65-0.82) | 0.75 (0.67-0.84) | <0.0001               |
| HR (95% CI), Model 2                      | Reference                                 | 0.94 (0.84-1.06) | 0.87 (0.78-0.97) | 0.80 (0.72-0.90) | 0.83 (0.74-0.93) | 0.0010                |
| <b>Heart failure</b>                      |                                           |                  |                  |                  |                  |                       |
| Events                                    | 224                                       | 207              | 226              | 202              | 206              |                       |
| Person-years                              | 199622                                    | 201283           | 201630           | 201784           | 202303           |                       |
| HR (95% CI), Model 1                      | Reference                                 | 0.83 (0.69-1.00) | 0.85 (0.70-1.02) | 0.71 (0.59-0.86) | 0.70 (0.58-0.84) | 0.0012                |
| HR (95% CI), Model 2                      | Reference                                 | 0.92 (0.76-1.11) | 0.96 (0.80-1.16) | 0.85 (0.70-1.03) | 0.85 (0.70-1.03) | 0.33                  |
| <b>Atrial fibrillation</b>                |                                           |                  |                  |                  |                  |                       |
| Events                                    | 78                                        | 82               | 83               | 100              | 89               |                       |
| Person-years                              | 196644                                    | 198594           | 198686           | 198547           | 199174           |                       |
| HR (95% CI), Model 1                      | Reference                                 | 0.96 (0.70-1.30) | 0.90 (0.66-1.23) | 1.04 (0.77-1.39) | 0.88 (0.65-1.19) | 0.80                  |
| HR (95% CI), Model 2                      | Reference                                 | 1.02 (0.74-1.39) | 0.98 (0.71-1.33) | 1.14 (0.84-1.54) | 0.98 (0.71-1.33) | 0.82                  |
| <b>Other cardiac disease</b>              |                                           |                  |                  |                  |                  |                       |
| Events                                    | 502                                       | 522              | 568              | 520              | 515              |                       |
| Person-years                              | 196876                                    | 199049           | 199061           | 199223           | 200259           |                       |
| HR (95% CI), Model 1                      | Reference                                 | 0.94 (0.83-1.07) | 0.98 (0.86-1.10) | 0.85 (0.75-0.96) | 0.81 (0.72-0.92) | 0.0019                |
| HR (95% CI), Model 2                      | Reference                                 | 1.00 (0.89-1.13) | 1.05 (0.93-1.18) | 0.94 (0.83-1.06) | 0.90 (0.79-1.02) | 0.12                  |
| <b>Stroke</b>                             |                                           |                  |                  |                  |                  |                       |
| Events                                    | 42                                        | 40               | 25               | 42               | 38               |                       |
| Person-years                              | 199670                                    | 201377           | 201466           | 201838           | 202138           |                       |
| HR (95% CI), Model 1                      | Reference                                 | 0.87 (0.56-1.34) | 0.51 (0.31-0.84) | 0.82 (0.53-1.26) | 0.72 (0.46-1.11) | 0.10                  |
| HR (95% CI), Model 2                      | Reference                                 | 0.92 (0.59-1.42) | 0.55 (0.33-0.91) | 0.91 (0.59-1.40) | 0.81 (0.51-1.26) | 0.18                  |
| <b>Peripheral vascular disease</b>        |                                           |                  |                  |                  |                  |                       |
| Events                                    | 136                                       | 106              | 110              | 117              | 136              |                       |
| Person-years                              | 199867                                    | 201764           | 201883           | 202220           | 202613           |                       |
| HR (95% CI), Model 1                      | Reference                                 | 0.72 (0.56-0.93) | 0.72 (0.56-0.92) | 0.73 (0.57-0.94) | 0.83 (0.66-1.06) | 0.0353                |
| HR (95% CI), Model 2                      | Reference                                 | 0.74 (0.57-0.95) | 0.74 (0.57-0.95) | 0.76 (0.59-0.98) | 0.85 (0.67-1.09) | 0.0710                |
| <b>Hypertension</b>                       |                                           |                  |                  |                  |                  |                       |
| Events                                    | 178                                       | 192              | 213              | 187              | 212              |                       |
| Person-years                              | 142957                                    | 148616           | 149572           | 151616           | 151934           |                       |
| HR (95% CI), Model 1                      | Reference                                 | 0.95 (0.78-1.17) | 1.00 (0.82-1.23) | 0.83 (0.67-1.02) | 0.92 (0.75-1.12) | 0.32                  |



|                                   |           |                  |                  |                  |                  |         |
|-----------------------------------|-----------|------------------|------------------|------------------|------------------|---------|
| HR (95% CI), Model 2              | Reference | 1.05 (0.85-1.29) | 1.13 (0.92-1.38) | 0.96 (0.78-1.18) | 1.09 (0.88-1.33) | 0.50    |
| <b>Diabetes</b>                   |           |                  |                  |                  |                  |         |
| Events                            | 448       | 324              | 300              | 278              | 234              |         |
| Person-years                      | 188118    | 192754           | 194306           | 195956           | 196970           |         |
| HR (95% CI), Model 1              | Reference | 0.68 (0.59-0.78) | 0.60 (0.52-0.70) | 0.54 (0.46-0.63) | 0.44 (0.38-0.52) | <0.0001 |
| HR (95% CI), Model 2              | Reference | 0.83 (0.72-0.96) | 0.77 (0.66-0.89) | 0.74 (0.64-0.87) | 0.63 (0.54-0.75) | <0.0001 |
| <b>All cancers<sup>‡</sup></b>    |           |                  |                  |                  |                  |         |
| Events                            | 669       | 702              | 754              | 760              | 756              |         |
| Person-years                      | 182632    | 183413           | 183586           | 183204           | 184041           |         |
| HR (95% CI), Model 1              | Reference | 0.98 (0.88-1.09) | 1.01 (0.91-1.12) | 0.98 (0.88-1.09) | 0.95 (0.86-1.05) | 0.81    |
| HR (95% CI), Model 2              | Reference | 1.00 (0.90-1.12) | 1.04 (0.94-1.15) | 1.02 (0.92-1.13) | 0.98 (0.88-1.09) | 0.85    |
| <b>Non-melanoma skin cancer</b>   |           |                  |                  |                  |                  |         |
| Events                            | 381       | 397              | 459              | 508              | 513              |         |
| Person-years                      | 195718    | 196737           | 197106           | 196313           | 196918           |         |
| HR (95% CI), Model 1              | Reference | 0.95 (0.83-1.10) | 1.05 (0.91-1.20) | 1.11 (0.97-1.27) | 1.09 (0.95-1.24) | 0.15    |
| HR (95% CI), Model 2              | Reference | 0.94 (0.81-1.08) | 1.02 (0.89-1.17) | 1.08 (0.95-1.24) | 1.06 (0.93-1.22) | 0.24    |
| <b>Melanoma</b>                   |           |                  |                  |                  |                  |         |
| Events                            | 44        | 74               | 61               | 65               | 51               |         |
| Person-years                      | 199346    | 200539           | 200620           | 200924           | 201022           |         |
| HR (95% CI), Model 1              | Reference | 1.58 (1.09-2.30) | 1.26 (0.86-1.86) | 1.30 (0.89-1.92) | 1.01 (0.67-1.51) | 0.0656  |
| HR (95% CI), Model 2              | Reference | 1.57 (1.08-2.29) | 1.26 (0.85-1.86) | 1.30 (0.88-1.92) | 1.01 (0.67-1.53) | 0.0781  |
| <b>Lung cancer</b>                |           |                  |                  |                  |                  |         |
| Events                            | 75        | 55               | 76               | 76               | 85               |         |
| Person-years                      | 200592    | 202252           | 202407           | 202596           | 203009           |         |
| HR (95% CI), Model 1              | Reference | 0.67 (0.47-0.95) | 0.88 (0.64-1.21) | 0.84 (0.61-1.16) | 0.91 (0.67-1.25) | 0.23    |
| HR (95% CI), Model 2              | Reference | 0.70 (0.50-0.97) | 0.92 (0.68-1.24) | 0.88 (0.65-1.19) | 0.85 (0.63-1.15) | 0.29    |
| <b>Stomach cancer</b>             |           |                  |                  |                  |                  |         |
| Events                            | 19        | 17               | 13               | 18               | 11               |         |
| Person-years                      | 201104    | 202655           | 202910           | 203055           | 203569           |         |
| HR (95% CI), Model 1              | Reference | 0.85 (0.44-1.64) | 0.62 (0.30-1.25) | 0.82 (0.43-1.57) | 0.48 (0.23-1.02) | 0.34    |
| HR (95% CI), Model 2              | Reference | 0.92 (0.92-0.92) | 0.69 (0.34-1.40) | 0.93 (0.93-0.93) | 0.56 (0.26-1.19) | 0.52    |
| <b>Oesophageal cancer</b>         |           |                  |                  |                  |                  |         |
| Events                            | 17        | 22               | 21               | 21               | 23               |         |
| Person-years                      | 201041    | 202654           | 202856           | 203112           | 203424           |         |
| HR (95% CI), Model 1              | Reference | 1.21 (0.64-2.28) | 1.10 (0.58-2.08) | 1.05 (0.55-1.99) | 1.11 (0.59-2.08) | 0.98    |
| HR (95% CI), Model 2              | Reference | 1.38 (0.73-2.60) | 1.29 (0.68-2.46) | 1.28 (0.67-2.46) | 1.37 (0.72-2.61) | 0.88    |
| <b>Colon cancer</b>               |           |                  |                  |                  |                  |         |
| Events                            | 90        | 84               | 88               | 99               | 111              |         |
| Person-years                      | 199437    | 201443           | 201473           | 201679           | 202035           |         |
| HR (95% CI), Model 1              | Reference | 0.86 (0.64-1.16) | 0.86 (0.64-1.16) | 0.93 (0.70-1.24) | 1.02 (0.77-1.34) | 0.68    |
| HR (95% CI), Model 2              | Reference | 0.89 (0.66-1.20) | 0.90 (0.67-1.21) | 0.98 (0.73-1.31) | 1.06 (0.80-1.42) | 0.71    |
| <b>Ovarian cancer<sup>§</sup></b> |           |                  |                  |                  |                  |         |
| Events                            | 25        | 32               | 23               | 27               | 22               |         |
| Person-years                      | 119305    | 121599           | 119579           | 118722           | 116172           |         |

|                              |           |                  |                  |                  |                  |         |
|------------------------------|-----------|------------------|------------------|------------------|------------------|---------|
| HR (95% CI), Model 1         | Reference | 1.21 (0.72-2.04) | 0.86 (0.49-1.52) | 1.00 (0.58-1.72) | 0.81 (0.46-1.44) | 0.63    |
| HR (95% CI), Model 2         | Reference | 1.23 (0.73-2.09) | 0.89 (0.51-1.58) | 1.05 (0.61-1.83) | 0.88 (0.49-1.58) | 0.72    |
| Breast cancer <sup>§</sup>   |           |                  |                  |                  |                  |         |
| Events                       | 208       | 219              | 223              | 195              | 199              |         |
| Person-years                 | 112826    | 114007           | 111983           | 111109           | 108764           |         |
| HR (95% CI), Model 1         | Reference | 1.03 (0.85-1.25) | 1.06 (0.88-1.28) | 0.93 (0.76-1.13) | 0.96 (0.79-1.17) | 0.66    |
| HR (95% CI), Model 2         | Reference | 1.05 (0.86-1.27) | 1.08 (0.89-1.31) | 0.94 (0.77-1.15) | 0.98 (0.80-1.19) | 0.67    |
| Prostate cancer <sup>¶</sup> |           |                  |                  |                  |                  |         |
| Events                       | 208       | 239              | 288              | 272              | 302              |         |
| Person-years                 | 90723     | 87685            | 89613            | 90181            | 92956            |         |
| HR (95% CI), Model 1         | Reference | 1.12 (0.93-1.34) | 1.25 (1.05-1.50) | 1.13 (0.95-1.36) | 1.19 (1.00-1.42) | 0.15    |
| HR (95% CI), Model 2         | Reference | 1.08 (0.89-1.30) | 1.19 (1.00-1.43) | 1.07 (0.89-1.28) | 1.12 (0.94-1.34) | 0.39    |
| Other cancers                |           |                  |                  |                  |                  |         |
| Events                       | 593       | 602              | 668              | 649              | 666              |         |
| Person-years                 | 185794    | 186784           | 187115           | 186968           | 187822           |         |
| HR (95% CI), Model 1         | Reference | 0.94 (0.84-1.06) | 1.01 (0.90-1.13) | 0.94 (0.84-1.06) | 0.94 (0.84-1.06) | 0.58    |
| HR (95% CI), Model 2         | Reference | 0.97 (0.87-1.09) | 1.04 (0.93-1.17) | 0.99 (0.88-1.11) | 0.99 (0.88-1.10) | 0.76    |
| Depression                   |           |                  |                  |                  |                  |         |
| Events                       | 71        | 56               | 46               | 61               | 48               |         |
| Person-years                 | 187489    | 190072           | 191842           | 191876           | 192814           |         |
| HR (95% CI), Model 1         | Reference | 0.79 (0.56-1.13) | 0.65 (0.45-0.94) | 0.87 (0.62-1.23) | 0.68 (0.47-0.99) | 0.14    |
| HR (95% CI), Model 2         | Reference | 0.85 (0.60-1.21) | 0.70 (0.48-1.02) | 0.96 (0.68-1.36) | 0.76 (0.52-1.11) | 0.30    |
| Anxiety                      |           |                  |                  |                  |                  |         |
| Events                       | 493       | 407              | 390              | 416              | 354              |         |
| Person-years                 | 193579    | 196345           | 196944           | 197205           | 198289           |         |
| HR (95% CI), Model 1         | Reference | 0.80 (0.70-0.91) | 0.76 (0.66-0.87) | 0.80 (0.70-0.91) | 0.68 (0.59-0.78) | <0.0001 |
| HR (95% CI), Model 2         | Reference | 0.83 (0.73-0.95) | 0.79 (0.69-0.91) | 0.85 (0.74-0.97) | 0.72 (0.62-0.83) | 0.0003  |
| Schizophrenia                |           |                  |                  |                  |                  |         |
| Events                       | 15        | 16               | 13               | 12               | 11               |         |
| Person-years                 | 200491    | 202079           | 202480           | 202723           | 203072           |         |
| HR (95% CI), Model 1         | Reference | 1.04 (0.51-2.10) | 0.82 (0.39-1.73) | 0.74 (0.35-1.59) | 0.67 (0.31-1.46) | 0.76    |
| HR (95% CI), Model 2         | Reference | 1.15 (0.56-2.33) | 0.92 (0.44-1.95) | 0.86 (0.40-1.86) | 0.78 (0.35-1.73) | 0.89    |
| Alcohol use disorder         |           |                  |                  |                  |                  |         |
| Events                       | 66        | 84               | 99               | 109              | 143              |         |
| Person-years                 | 200061    | 201580           | 201815           | 202004           | 202159           |         |
| HR (95% CI), Model 1         | Reference | 1.26 (0.91-1.74) | 1.45 (1.06-1.97) | 1.57 (1.15-2.13) | 2.01 (1.50-2.69) | <0.0001 |
| HR (95% CI), Model 2         | Reference | 1.30 (0.94-1.79) | 1.47 (1.08-2.01) | 1.60 (1.17-2.18) | 2.00 (1.48-2.69) | <0.0001 |
| Psychoactive substance abuse |           |                  |                  |                  |                  |         |
| Events                       | 13        | 14               | 20               | 24               | 24               |         |
| Person-years                 | 200938    | 202416           | 202692           | 203017           | 203449           |         |
| HR (95% CI), Model 1         | Reference | 1.09 (0.51-2.31) | 1.54 (0.77-3.11) | 1.85 (0.94-3.65) | 1.83 (0.93-3.60) | 0.24    |
| HR (95% CI), Model 2         | Reference | 1.18 (0.55-2.52) | 1.71 (0.85-3.46) | 2.06 (1.04-4.10) | 2.00 (1.00-3.99) | 0.16    |
| Epilepsy                     |           |                  |                  |                  |                  |         |
| Events                       | 51        | 40               | 43               | 49               | 51               |         |

|                       |           |                  |                  |                  |                  |         |
|-----------------------|-----------|------------------|------------------|------------------|------------------|---------|
| Person-years          | 199148    | 201036           | 201426           | 201623           | 202209           |         |
| HR (95% CI), Model 1  | Reference | 0.74 (0.49-1.13) | 0.78 (0.52-1.16) | 0.86 (0.58-1.27) | 0.88 (0.59-1.29) | 0.65    |
| HR (95% CI), Model 2  | Reference | 0.75 (0.49-1.13) | 0.78 (0.52-1.18) | 0.86 (0.58-1.28) | 0.86 (0.58-1.28) | 0.68    |
| Migraine              |           |                  |                  |                  |                  |         |
| Events                | 97        | 80               | 81               | 101              | 74               |         |
| Person-years          | 191744    | 194678           | 196297           | 196734           | 197792           |         |
| HR (95% CI), Model 1  | Reference | 0.80 (0.60-1.08) | 0.81 (0.60-1.09) | 1.01 (0.76-1.33) | 0.74 (0.54-1.00) | 0.14    |
| HR (95% CI), Model 2  | Reference | 0.81 (0.60-1.09) | 0.80 (0.60-1.08) | 0.99 (0.75-1.32) | 0.71 (0.52-0.97) | 0.11    |
| Dementia              |           |                  |                  |                  |                  |         |
| Events                | 109       | 113              | 114              | 121              | 124              |         |
| Person-years          | 200929    | 202444           | 202671           | 202893           | 203261           |         |
| HR (95% CI), Model 1  | Reference | 0.90 (0.69-1.17) | 0.85 (0.65-1.10) | 0.84 (0.65-1.09) | 0.83 (0.64-1.07) | 0.61    |
| HR (95% CI), Model 2  | Reference | 0.91 (0.70-1.19) | 0.86 (0.66-1.12) | 0.86 (0.66-1.11) | 0.85 (0.65-1.11) | 0.72    |
| Parkinson's disease   |           |                  |                  |                  |                  |         |
| Events                | 47        | 62               | 59               | 58               | 65               |         |
| Person-years          | 200655    | 202307           | 202511           | 202970           | 203175           |         |
| HR (95% CI), Model 1  | Reference | 1.15 (0.79-1.68) | 1.02 (0.69-1.50) | 0.94 (0.64-1.39) | 1.02 (0.70-1.49) | 0.88    |
| HR (95% CI), Model 2  | Reference | 1.14 (0.78-1.66) | 1.00 (0.68-1.48) | 0.92 (0.63-1.36) | 1.01 (0.69-1.48) | 0.86    |
| Multiple sclerosis    |           |                  |                  |                  |                  |         |
| Events                | 14        | 6                | 9                | 13               | 9                |         |
| Person-years          | 200453    | 201770           | 202460           | 202417           | 202884           |         |
| HR (95% CI), Model 1  | Reference | 0.42 (0.16-1.10) | 0.64 (0.27-1.47) | 0.92 (0.43-1.97) | 0.64 (0.28-1.50) | 0.39    |
| HR (95% CI), Model 2  | Reference | 0.44 (0.17-1.15) | 0.66 (0.28-1.54) | 0.96 (0.44-2.08) | 0.66 (0.28-1.55) | 0.45    |
| Bronchiectasis        |           |                  |                  |                  |                  |         |
| Events                | 84        | 86               | 84               | 109              | 98               |         |
| Person-years          | 200145    | 201836           | 202024           | 202150           | 202666           |         |
| HR (95% CI), Model 1  | Reference | 0.93 (0.69-1.25) | 0.87 (0.64-1.17) | 1.07 (0.81-1.42) | 0.94 (0.70-1.26) | 0.64    |
| HR (95% CI), Model 2  | Reference | 0.92 (0.68-1.24) | 0.85 (0.63-1.15) | 1.04 (0.78-1.39) | 0.90 (0.67-1.22) | 0.63    |
| Asthma                |           |                  |                  |                  |                  |         |
| Events                | 194       | 197              | 208              | 211              | 165              |         |
| Person-years          | 170654    | 173239           | 174336           | 176092           | 176521           |         |
| HR (95% CI), Model 1  | Reference | 0.98 (0.80-1.20) | 1.02 (0.84-1.24) | 1.01 (0.83-1.23) | 0.78 (0.63-0.96) | 0.0696  |
| HR (95% CI), Model 2  | Reference | 1.06 (0.86-1.29) | 1.11 (0.91-1.35) | 1.13 (0.92-1.37) | 0.88 (0.71-1.09) | 0.13    |
| COPD                  |           |                  |                  |                  |                  |         |
| Events                | 260       | 251              | 245              | 217              | 251              |         |
| Person-years          | 197028    | 199055           | 199521           | 200061           | 199876           |         |
| HR (95% CI), Model 1  | Reference | 0.87 (0.73-1.04) | 0.81 (0.68-0.96) | 0.68 (0.57-0.81) | 0.77 (0.64-0.91) | 0.0005  |
| HR (95% CI), Model 2  | Reference | 0.92 (0.78-1.10) | 0.85 (0.71-1.01) | 0.72 (0.60-0.86) | 0.76 (0.64-0.91) | 0.0017  |
| CKD                   |           |                  |                  |                  |                  |         |
| Events                | 735       | 583              | 566              | 550              | 512              |         |
| Person-years          | 196067    | 198330           | 199203           | 199435           | 200185           |         |
| HR (95% CI), Model 1  | Reference | 0.71 (0.63-0.79) | 0.65 (0.58-0.72) | 0.60 (0.53-0.67) | 0.53 (0.48-0.60) | <0.0001 |
| HR (95% CI), Model 2  | Reference | 0.78 (0.70-0.87) | 0.74 (0.66-0.82) | 0.70 (0.63-0.78) | 0.64 (0.57-0.72) | <0.0001 |
| Chronic liver disease |           |                  |                  |                  |                  |         |

|                            |           |                  |                  |                  |                  |         |
|----------------------------|-----------|------------------|------------------|------------------|------------------|---------|
| Events                     | 47        | 34               | 30               | 33               | 19               |         |
| Person-years               | 199884    | 201665           | 201852           | 202180           | 202589           |         |
| HR (95% CI), Model 1       | Reference | 0.69 (0.44-1.08) | 0.60 (0.38-0.95) | 0.65 (0.42-1.02) | 0.37 (0.22-0.63) | 0.0062  |
| HR (95% CI), Model 2       | Reference | 0.79 (0.51-1.23) | 0.71 (0.45-1.13) | 0.80 (0.51-1.27) | 0.47 (0.27-0.80) | 0.0977  |
| Irritable bowel syndrome   |           |                  |                  |                  |                  |         |
| Events                     | 171       | 161              | 161              | 140              | 124              |         |
| Person-years               | 193458    | 196115           | 197073           | 197915           | 198578           |         |
| HR (95% CI), Model 1       | Reference | 0.91 (0.73-1.13) | 0.90 (0.72-1.12) | 0.77 (0.62-0.97) | 0.68 (0.54-0.86) | 0.0127  |
| HR (95% CI), Model 2       | Reference | 0.95 (0.76-1.18) | 0.94 (0.76-1.17) | 0.82 (0.65-1.03) | 0.73 (0.58-0.93) | 0.0672  |
| Inflammatory bowel disease |           |                  |                  |                  |                  |         |
| Events                     | 63        | 60               | 54               | 53               | 54               |         |
| Person-years               | 198232    | 200187           | 200756           | 201327           | 201786           |         |
| HR (95% CI), Model 1       | Reference | 0.93 (0.66-1.33) | 0.83 (0.58-1.20) | 0.81 (0.56-1.17) | 0.82 (0.57-1.18) | 0.73    |
| HR (95% CI), Model 2       | Reference | 0.96 (0.67-1.37) | 0.85 (0.59-1.23) | 0.83 (0.57-1.21) | 0.83 (0.57-1.21) | 0.80    |
| Treated constipation       |           |                  |                  |                  |                  |         |
| Events                     | 463       | 441              | 440              | 437              | 457              |         |
| Person-years               | 196088    | 197178           | 198064           | 198073           | 199164           |         |
| HR (95% CI), Model 1       | Reference | 0.89 (0.78-1.01) | 0.85 (0.75-0.97) | 0.82 (0.72-0.93) | 0.83 (0.73-0.95) | 0.0193  |
| HR (95% CI), Model 2       | Reference | 0.91 (0.80-1.04) | 0.87 (0.77-1.00) | 0.85 (0.74-0.97) | 0.86 (0.76-0.99) | 0.11    |
| Dyspepsia                  |           |                  |                  |                  |                  |         |
| Events                     | 1192      | 1213             | 1096             | 1076             | 1045             |         |
| Person-years               | 165286    | 169926           | 171957           | 174183           | 175161           |         |
| HR (95% CI), Model 1       | Reference | 0.95 (0.87-1.02) | 0.82 (0.76-0.89) | 0.78 (0.72-0.85) | 0.74 (0.68-0.80) | <0.0001 |
| HR (95% CI), Model 2       | Reference | 0.98 (0.91-1.07) | 0.86 (0.79-0.94) | 0.83 (0.76-0.90) | 0.80 (0.73-0.87) | <0.0001 |
| Diverticular disease       |           |                  |                  |                  |                  |         |
| Events                     | 990       | 1012             | 961              | 973              | 962              |         |
| Person-years               | 185776    | 187755           | 188925           | 188946           | 189765           |         |
| HR (95% CI), Model 1       | Reference | 0.97 (0.89-1.06) | 0.89 (0.82-0.97) | 0.88 (0.81-0.96) | 0.85 (0.78-0.93) | 0.0013  |
| HR (95% CI), Model 2       | Reference | 1.00 (0.92-1.10) | 0.92 (0.84-1.01) | 0.92 (0.84-1.01) | 0.89 (0.81-0.97) | 0.0271  |
| Pernicious anaemia         |           |                  |                  |                  |                  |         |
| Events                     | 20        | 16               | 15               | 16               | 18               |         |
| Person-years               | 200205    | 202226           | 202470           | 202883           | 203317           |         |
| HR (95% CI), Model 1       | Reference | 0.77 (0.40-1.48) | 0.70 (0.36-1.37) | 0.73 (0.38-1.42) | 0.81 (0.43-1.54) | 0.85    |
| HR (95% CI), Model 2       | Reference | 0.83 (0.43-1.61) | 0.78 (0.40-1.53) | 0.84 (0.43-1.64) | 0.95 (0.49-1.82) | 0.95    |
| Fracture                   |           |                  |                  |                  |                  |         |
| Events                     | 89        | 95               | 102              | 103              | 128              |         |
| Person-years               | 199625    | 201255           | 201432           | 201793           | 201878           |         |
| HR (95% CI), Model 1       | Reference | 0.97 (0.72-1.29) | 1.00 (0.75-1.32) | 0.96 (0.72-1.27) | 1.17 (0.89-1.54) | 0.52    |
| HR (95% CI), Model 2       | Reference | 0.93 (0.70-1.25) | 0.95 (0.71-1.26) | 0.89 (0.67-1.19) | 1.07 (0.81-1.41) | 0.69    |
| Osteoporosis               |           |                  |                  |                  |                  |         |
| Events                     | 704       | 762              | 779              | 735              | 752              |         |
| Person-years               | 177362    | 180142           | 180158           | 179743           | 180983           |         |
| HR (95% CI), Model 1       | Reference | 0.99 (0.89-1.10) | 0.98 (0.88-1.08) | 0.89 (0.80-0.99) | 0.89 (0.80-0.98) | 0.0367  |
| HR (95% CI), Model 2       | Reference | 1.07 (0.96-1.19) | 1.08 (0.98-1.20) | 1.01 (0.91-1.12) | 1.03 (0.93-1.15) | 0.49    |

|                                 |           |                  |                  |                  |                  |         |
|---------------------------------|-----------|------------------|------------------|------------------|------------------|---------|
| Meniere's disease               |           |                  |                  |                  |                  |         |
| Events                          | 10        | 13               | 12               | 12               | 10               |         |
| Person-years                    | 200488    | 202153           | 202485           | 202628           | 203064           |         |
| HR (95% CI), Model 1            | Reference | 1.27 (0.56-2.90) | 1.15 (0.50-2.68) | 1.14 (0.49-2.65) | 0.94 (0.39-2.26) | 0.96    |
| HR (95% CI), Model 2            | Reference | 1.37 (0.60-3.15) | 1.28 (0.55-3.00) | 1.31 (0.56-3.07) | 1.10 (0.45-2.71) | 0.94    |
| Eczema                          |           |                  |                  |                  |                  |         |
| Events                          | 148       | 188              | 156              | 164              | 166              |         |
| Person-years                    | 191816    | 193890           | 193515           | 194513           | 194920           |         |
| HR (95% CI), Model 1            | Reference | 1.21 (0.97-1.50) | 0.98 (0.78-1.23) | 1.00 (0.80-1.25) | 1.00 (0.80-1.25) | 0.25    |
| HR (95% CI), Model 2            | Reference | 1.25 (1.00-1.55) | 1.01 (0.81-1.27) | 1.04 (0.83-1.30) | 1.02 (0.81-1.28) | 0.19    |
| Glaucoma                        |           |                  |                  |                  |                  |         |
| Events                          | 208       | 228              | 233              | 232              | 236              |         |
| Person-years                    | 198218    | 199402           | 199462           | 199535           | 199601           |         |
| HR (95% CI), Model 1            | Reference | 1.00 (0.83-1.20) | 0.97 (0.80-1.17) | 0.92 (0.76-1.11) | 0.91 (0.75-1.10) | 0.78    |
| HR (95% CI), Model 2            | Reference | 0.98 (0.82-1.19) | 0.95 (0.79-1.15) | 0.90 (0.75-1.09) | 0.89 (0.74-1.08) | 0.69    |
| Cataract                        |           |                  |                  |                  |                  |         |
| Events                          | 922       | 1017             | 1065             | 1080             | 1092             |         |
| Person-years                    | 189855    | 190769           | 190522           | 190222           | 190322           |         |
| HR (95% CI), Model 1            | Reference | 0.98 (0.89-1.07) | 0.97 (0.89-1.06) | 0.93 (0.85-1.01) | 0.91 (0.83-0.99) | 0.19    |
| HR (95% CI), Model 2            | Reference | 1.00 (0.92-1.10) | 1.01 (0.92-1.10) | 0.97 (0.89-1.06) | 0.96 (0.88-1.05) | 0.77    |
| AMD                             |           |                  |                  |                  |                  |         |
| Events                          | 155       | 158              | 211              | 199              | 200              |         |
| Person-years                    | 199846    | 201530           | 201424           | 201764           | 201993           |         |
| HR (95% CI), Model 1            | Reference | 0.89 (0.72-1.12) | 1.13 (0.92-1.39) | 1.00 (0.81-1.24) | 0.98 (0.80-1.21) | 0.26    |
| HR (95% CI), Model 2            | Reference | 0.92 (0.73-1.14) | 1.16 (0.94-1.44) | 1.04 (0.84-1.28) | 1.02 (0.82-1.26) | 0.24    |
| Thyroid disorders               |           |                  |                  |                  |                  |         |
| Events                          | 306       | 284              | 310              | 270              | 224              |         |
| Person-years                    | 185825    | 188090           | 189211           | 190050           | 191200           |         |
| HR (95% CI), Model 1            | Reference | 0.88 (0.74-1.03) | 0.94 (0.80-1.10) | 0.80 (0.68-0.94) | 0.66 (0.56-0.79) | <0.0001 |
| HR (95% CI), Model 2            | Reference | 0.92 (0.79-1.09) | 1.01 (0.86-1.18) | 0.87 (0.74-1.03) | 0.73 (0.61-0.87) | 0.0023  |
| Prostate disorders <sup>†</sup> |           |                  |                  |                  |                  |         |
| Events                          | 381       | 415              | 466              | 458              | 425              |         |
| Person-years                    | 84652     | 81600            | 83060            | 83505            | 86648            |         |
| HR (95% CI), Model 1            | Reference | 1.05 (0.91-1.20) | 1.10 (0.96-1.26) | 1.03 (0.90-1.18) | 0.89 (0.78-1.03) | 0.0345  |
| HR (95% CI), Model 2            | Reference | 1.05 (0.91-1.20) | 1.10 (0.96-1.26) | 1.03 (0.89-1.18) | 0.89 (0.77-1.03) | 0.0339  |

AMD, age related macular degeneration; CI, confidence interval; CKD, chronic kidney disease; COPD, chronic obstructive pulmonary disease; HR, hazard ratio.

\*Cox proportional hazard regression models were used to examine associations of the Anti-Empirical Dietary Inflammatory Index (quintiles) with the incidence of individual chronic diseases. The statistical tests were two-sided. Model 1 was adjusted for age and sex; Model 2 was adjusted for Model 1 plus ethnicity, education, income, smoking, alcohol consumption, sleep, physical activity, and GRS for longevity; Model 3 was adjusted for Model 2 and total energy intake.

<sup>†</sup>Cardiovascular disease includes coronary heart disease, heart failure, atrial fibrillation, other cardiac disease, stroke, and peripheral vascular disease.

‡All cancers encompass any type of cancer except for non-melanoma skin cancer.

§These analyses were conducted among women only.

¶These analyses were conducted among men only.

**Table S7. The association between the Alternate Healthy Eating Index-2010 and the incidence of individual chronic diseases among individuals by excluding those developed the corresponding disease in the first 4 years of follow-up**

|                                           | Alternate Healthy Eating Index-2010 |                  |                  |                  |                  | P-value<br>for<br>trend* |
|-------------------------------------------|-------------------------------------|------------------|------------------|------------------|------------------|--------------------------|
|                                           | Quintile 1                          | Quintile 2       | Quintile 3       | Quintile 4       | Quintile 5       |                          |
| <b>Cardiovascular disease<sup>†</sup></b> |                                     |                  |                  |                  |                  |                          |
| Events                                    | 1067                                | 1053             | 986              | 992              | 994              |                          |
| Person-years                              | 184030                              | 187117           | 187759           | 189807           | 190358           |                          |
| HR (95% CI), Model 1                      | Reference                           | 0.94 (0.87-1.03) | 0.86 (0.79-0.94) | 0.86 (0.79-0.94) | 0.86 (0.79-0.94) | 0.0006                   |
| HR (95% CI), Model 2                      | Reference                           | 0.98 (0.90-1.07) | 0.90 (0.83-0.98) | 0.91 (0.84-1.00) | 0.92 (0.84-1.00) | 0.0718                   |
| <b>Coronary heart disease</b>             |                                     |                  |                  |                  |                  |                          |
| Events                                    | 607                                 | 628              | 578              | 553              | 615              |                          |
| Person-years                              | 192715                              | 195174           | 195392           | 196801           | 197694           |                          |
| HR (95% CI), Model 1                      | Reference                           | 1.01 (0.91-1.13) | 0.92 (0.82-1.03) | 0.89 (0.79-1.00) | 0.99 (0.89-1.11) | 0.0919                   |
| HR (95% CI), Model 2                      | Reference                           | 1.06 (0.94-1.18) | 0.98 (0.87-1.09) | 0.95 (0.85-1.07) | 1.08 (0.96-1.21) | 0.15                     |
| <b>Heart failure</b>                      |                                     |                  |                  |                  |                  |                          |
| Events                                    | 228                                 | 217              | 210              | 206              | 204              |                          |
| Person-years                              | 199282                              | 201250           | 201256           | 202043           | 202791           |                          |
| HR (95% CI), Model 1                      | Reference                           | 0.90 (0.75-1.09) | 0.85 (0.70-1.02) | 0.83 (0.69-1.00) | 0.81 (0.67-0.98) | 0.19                     |
| HR (95% CI), Model 2                      | Reference                           | 0.96 (0.80-1.16) | 0.93 (0.77-1.12) | 0.92 (0.76-1.11) | 0.92 (0.76-1.11) | 0.88                     |
| <b>Atrial fibrillation</b>                |                                     |                  |                  |                  |                  |                          |
| Events                                    | 93                                  | 99               | 79               | 86               | 75               |                          |
| Person-years                              | 195953                              | 198077           | 198482           | 199307           | 199825           |                          |
| HR (95% CI), Model 1                      | Reference                           | 1.02 (0.77-1.36) | 0.79 (0.59-1.07) | 0.87 (0.64-1.16) | 0.75 (0.55-1.02) | 0.18                     |
| HR (95% CI), Model 2                      | Reference                           | 1.06 (0.80-1.41) | 0.84 (0.62-1.14) | 0.93 (0.69-1.25) | 0.83 (0.61-1.13) | 0.41                     |
| <b>Other cardiac disease</b>              |                                     |                  |                  |                  |                  |                          |
| Events                                    | 591                                 | 530              | 503              | 503              | 500              |                          |
| Person-years                              | 196532                              | 198439           | 198870           | 200165           | 200462           |                          |
| HR (95% CI), Model 1                      | Reference                           | 0.86 (0.76-0.96) | 0.79 (0.70-0.89) | 0.79 (0.70-0.89) | 0.78 (0.69-0.88) | <0.0001                  |
| HR (95% CI), Model 2                      | Reference                           | 0.89 (0.79-1.01) | 0.84 (0.74-0.94) | 0.84 (0.75-0.95) | 0.84 (0.74-0.95) | 0.0145                   |
| <b>Stroke</b>                             |                                     |                  |                  |                  |                  |                          |
| Events                                    | 41                                  | 37               | 41               | 33               | 35               |                          |
| Person-years                              | 199322                              | 200926           | 201249           | 202109           | 202883           |                          |
| HR (95% CI), Model 1                      | Reference                           | 0.86 (0.55-1.34) | 0.92 (0.60-1.42) | 0.74 (0.46-1.17) | 0.77 (0.49-1.21) | 0.67                     |
| HR (95% CI), Model 2                      | Reference                           | 0.88 (0.57-1.38) | 0.95 (0.61-1.47) | 0.75 (0.47-1.19) | 0.78 (0.49-1.23) | 0.70                     |
| <b>Peripheral vascular disease</b>        |                                     |                  |                  |                  |                  |                          |
| Events                                    | 131                                 | 130              | 110              | 117              | 117              |                          |
| Person-years                              | 199678                              | 201398           | 201847           | 202471           | 202953           |                          |
| HR (95% CI), Model 1                      | Reference                           | 0.95 (0.75-1.21) | 0.79 (0.61-1.01) | 0.83 (0.65-1.07) | 0.82 (0.64-1.06) | 0.27                     |
| HR (95% CI), Model 2                      | Reference                           | 0.99 (0.77-1.26) | 0.81 (0.63-1.05) | 0.87 (0.67-1.12) | 0.85 (0.66-1.10) | 0.41                     |
| <b>Hypertension</b>                       |                                     |                  |                  |                  |                  |                          |
| Events                                    | 247                                 | 187              | 207              | 164              | 177              |                          |
| Person-years                              | 144375                              | 148003           | 149437           | 150808           | 152070           |                          |
| HR (95% CI), Model 1                      | Reference                           | 0.72 (0.59-0.87) | 0.77 (0.64-0.93) | 0.61 (0.50-0.74) | 0.65 (0.53-0.79) | <0.0001                  |

|                                   |           |                  |                  |                  |                  |         |
|-----------------------------------|-----------|------------------|------------------|------------------|------------------|---------|
| HR (95% CI), Model 2              | Reference | 0.76 (0.63-0.92) | 0.83 (0.68-0.99) | 0.67 (0.55-0.82) | 0.72 (0.59-0.88) | 0.0007  |
| <b>Diabetes</b>                   |           |                  |                  |                  |                  |         |
| Events                            | 377       | 332              | 303              | 299              | 273              |         |
| Person-years                      | 191604    | 193722           | 194231           | 193903           | 194644           |         |
| HR (95% CI), Model 1              | Reference | 0.87 (0.75-1.01) | 0.79 (0.67-0.91) | 0.78 (0.67-0.91) | 0.72 (0.61-0.84) | 0.0003  |
| HR (95% CI), Model 2              | Reference | 0.97 (0.83-1.12) | 0.92 (0.79-1.07) | 0.94 (0.81-1.10) | 0.87 (0.75-1.03) | 0.55    |
| <b>All cancers<sup>‡</sup></b>    |           |                  |                  |                  |                  |         |
| Events                            | 750       | 748              | 767              | 702              | 674              |         |
| Person-years                      | 179521    | 183975           | 183533           | 184465           | 185383           |         |
| HR (95% CI), Model 1              | Reference | 0.93 (0.84-1.03) | 0.93 (0.84-1.03) | 0.84 (0.76-0.93) | 0.79 (0.71-0.88) | <0.0001 |
| HR (95% CI), Model 2              | Reference | 0.96 (0.87-1.07) | 0.98 (0.88-1.08) | 0.89 (0.81-0.99) | 0.85 (0.77-0.95) | 0.0163  |
| <b>Non-melanoma skin cancer</b>   |           |                  |                  |                  |                  |         |
| Events                            | 463       | 440              | 438              | 482              | 435              |         |
| Person-years                      | 194806    | 196459           | 196368           | 197226           | 197932           |         |
| HR (95% CI), Model 1              | Reference | 0.91 (0.80-1.03) | 0.88 (0.77-1.01) | 0.97 (0.85-1.10) | 0.86 (0.76-0.98) | 0.14    |
| HR (95% CI), Model 2              | Reference | 0.89 (0.78-1.02) | 0.86 (0.75-0.98) | 0.94 (0.83-1.08) | 0.83 (0.73-0.95) | 0.0482  |
| <b>Melanoma</b>                   |           |                  |                  |                  |                  |         |
| Events                            | 60        | 50               | 62               | 57               | 66               |         |
| Person-years                      | 198738    | 200487           | 200372           | 201096           | 201758           |         |
| HR (95% CI), Model 1              | Reference | 0.80 (0.55-1.16) | 0.97 (0.68-1.39) | 0.89 (0.62-1.28) | 1.01 (0.71-1.44) | 0.71    |
| HR (95% CI), Model 2              | Reference | 0.79 (0.54-1.16) | 0.97 (0.68-1.39) | 0.89 (0.62-1.29) | 1.03 (0.72-1.48) | 0.57    |
| <b>Lung cancer</b>                |           |                  |                  |                  |                  |         |
| Events                            | 100       | 72               | 64               | 73               | 58               |         |
| Person-years                      | 200122    | 202121           | 202174           | 202928           | 203509           |         |
| HR (95% CI), Model 1              | Reference | 0.66 (0.49-0.90) | 0.56 (0.41-0.77) | 0.63 (0.46-0.85) | 0.48 (0.35-0.67) | 0.0001  |
| HR (95% CI), Model 2              | Reference | 0.76 (0.57-1.01) | 0.64 (0.48-0.87) | 0.77 (0.57-1.03) | 0.60 (0.44-0.82) | 0.0100  |
| <b>Stomach cancer</b>             |           |                  |                  |                  |                  |         |
| Events                            | 20        | 18               | 14               | 12               | 14               |         |
| Person-years                      | 200943    | 202502           | 202633           | 203270           | 203947           |         |
| HR (95% CI), Model 1              | Reference | 0.90 (0.48-1.71) | 0.70 (0.35-1.39) | 0.61 (0.30-1.25) | 0.72 (0.36-1.43) | 0.64    |
| HR (95% CI), Model 2              | Reference | 0.94 (0.50-1.78) | 0.75 (0.38-1.50) | 0.65 (0.32-1.35) | 0.79 (0.39-1.59) | 0.78    |
| <b>Oesophageal cancer</b>         |           |                  |                  |                  |                  |         |
| Events                            | 29        | 23               | 17               | 15               | 20               |         |
| Person-years                      | 200759    | 202520           | 202569           | 203310           | 203929           |         |
| HR (95% CI), Model 1              | Reference | 0.78 (0.45-1.35) | 0.57 (0.31-1.04) | 0.51 (0.27-0.95) | 0.68 (0.38-1.20) | 0.20    |
| HR (95% CI), Model 2              | Reference | 0.87 (0.50-1.51) | 0.65 (0.36-1.20) | 0.60 (0.32-1.13) | 0.83 (0.46-1.49) | 0.48    |
| <b>Colon cancer</b>               |           |                  |                  |                  |                  |         |
| Events                            | 87        | 113              | 113              | 84               | 75               |         |
| Person-years                      | 199214    | 201247           | 201087           | 201793           | 202726           |         |
| HR (95% CI), Model 1              | Reference | 1.24 (0.93-1.64) | 1.21 (0.91-1.60) | 0.89 (0.66-1.20) | 0.78 (0.57-1.06) | 0.0062  |
| HR (95% CI), Model 2              | Reference | 1.28 (0.96-1.69) | 1.27 (0.96-1.68) | 0.94 (0.69-1.27) | 0.84 (0.61-1.15) | 0.0118  |
| <b>Ovarian cancer<sup>§</sup></b> |           |                  |                  |                  |                  |         |
| Events                            | 17        | 30               | 26               | 22               | 34               |         |
| Person-years                      | 100570    | 114204           | 119920           | 126547           | 134134           |         |



|                              |           |                  |                  |                  |                  |         |
|------------------------------|-----------|------------------|------------------|------------------|------------------|---------|
| HR (95% CI), Model 1         | Reference | 1.48 (0.81-2.68) | 1.19 (0.64-2.19) | 0.93 (0.49-1.76) | 1.33 (0.74-2.38) | 0.47    |
| HR (95% CI), Model 2         | Reference | 1.48 (0.82-2.69) | 1.20 (0.65-2.21) | 0.94 (0.50-1.77) | 1.33 (0.74-2.40) | 0.46    |
| Breast cancer <sup>§</sup>   |           |                  |                  |                  |                  |         |
| Events                       | 202       | 208              | 210              | 212              | 212              |         |
| Person-years                 | 93943     | 107506           | 112724           | 119139           | 125377           |         |
| HR (95% CI), Model 1         | Reference | 0.88 (0.73-1.07) | 0.84 (0.69-1.02) | 0.80 (0.66-0.97) | 0.75 (0.62-0.91) | 0.0432  |
| HR (95% CI), Model 2         | Reference | 0.90 (0.74-1.09) | 0.86 (0.71-1.05) | 0.83 (0.68-1.00) | 0.78 (0.64-0.95) | 0.14    |
| Prostate cancer <sup>¶</sup> |           |                  |                  |                  |                  |         |
| Events                       | 286       | 269              | 288              | 250              | 216              |         |
| Person-years                 | 107855    | 94358            | 88986            | 83440            | 76517            |         |
| HR (95% CI), Model 1         | Reference | 1.01 (0.85-1.19) | 1.11 (0.94-1.31) | 1.01 (0.86-1.20) | 0.94 (0.79-1.12) | 0.46    |
| HR (95% CI), Model 2         | Reference | 0.98 (0.83-1.16) | 1.07 (0.91-1.27) | 0.99 (0.83-1.17) | 0.92 (0.77-1.10) | 0.53    |
| Other cancers                |           |                  |                  |                  |                  |         |
| Events                       | 666       | 656              | 656              | 620              | 580              |         |
| Person-years                 | 183347    | 187135           | 187233           | 188072           | 188695           |         |
| HR (95% CI), Model 1         | Reference | 0.92 (0.83-1.03) | 0.90 (0.81-1.01) | 0.84 (0.75-0.94) | 0.77 (0.69-0.87) | 0.0001  |
| HR (95% CI), Model 2         | Reference | 0.96 (0.86-1.07) | 0.94 (0.85-1.05) | 0.89 (0.80-1.00) | 0.83 (0.74-0.93) | 0.0156  |
| Depression                   |           |                  |                  |                  |                  |         |
| Events                       | 64        | 61               | 39               | 44               | 74               |         |
| Person-years                 | 188001    | 190590           | 191344           | 192208           | 191948           |         |
| HR (95% CI), Model 1         | Reference | 0.92 (0.65-1.31) | 0.58 (0.39-0.87) | 0.64 (0.44-0.95) | 1.06 (0.76-1.49) | 0.0052  |
| HR (95% CI), Model 2         | Reference | 0.97 (0.68-1.38) | 0.62 (0.41-0.92) | 0.69 (0.47-1.02) | 1.14 (0.81-1.61) | 0.0082  |
| Anxiety                      |           |                  |                  |                  |                  |         |
| Events                       | 432       | 385              | 393              | 394              | 456              |         |
| Person-years                 | 194276    | 196477           | 196756           | 197524           | 197329           |         |
| HR (95% CI), Model 1         | Reference | 0.83 (0.73-0.96) | 0.83 (0.72-0.95) | 0.81 (0.70-0.93) | 0.91 (0.79-1.04) | 0.0120  |
| HR (95% CI), Model 2         | Reference | 0.86 (0.75-0.99) | 0.87 (0.75-0.99) | 0.85 (0.74-0.98) | 0.95 (0.83-1.08) | 0.0812  |
| Schizophrenia                |           |                  |                  |                  |                  |         |
| Events                       | 19        | 11               | 11               | 13               | 13               |         |
| Person-years                 | 200432    | 202027           | 202088           | 202842           | 203456           |         |
| HR (95% CI), Model 1         | Reference | 0.56 (0.26-1.17) | 0.54 (0.26-1.15) | 0.63 (0.31-1.28) | 0.62 (0.30-1.26) | 0.41    |
| HR (95% CI), Model 2         | Reference | 0.62 (0.30-1.31) | 0.63 (0.30-1.33) | 0.76 (0.37-1.55) | 0.76 (0.37-1.57) | 0.70    |
| Alcohol use disorder         |           |                  |                  |                  |                  |         |
| Events                       | 189       | 107              | 81               | 80               | 44               |         |
| Person-years                 | 198679    | 201285           | 201731           | 202517           | 203406           |         |
| HR (95% CI), Model 1         | Reference | 0.57 (0.45-0.73) | 0.43 (0.33-0.56) | 0.43 (0.33-0.57) | 0.24 (0.17-0.34) | <0.0001 |
| HR (95% CI), Model 2         | Reference | 0.61 (0.48-0.77) | 0.47 (0.36-0.61) | 0.49 (0.37-0.64) | 0.28 (0.20-0.39) | <0.0001 |
| Psychoactive substance abuse |           |                  |                  |                  |                  |         |
| Events                       | 35        | 23               | 10               | 17               | 10               |         |
| Person-years                 | 200480    | 202404           | 202541           | 203288           | 203799           |         |
| HR (95% CI), Model 1         | Reference | 0.68 (0.40-1.16) | 0.30 (0.15-0.61) | 0.53 (0.29-0.94) | 0.32 (0.16-0.65) | 0.0013  |
| HR (95% CI), Model 2         | Reference | 0.77 (0.45-1.30) | 0.34 (0.17-0.70) | 0.63 (0.35-1.13) | 0.38 (0.19-0.78) | 0.0110  |
| Epilepsy                     |           |                  |                  |                  |                  |         |
| Events                       | 52        | 49               | 45               | 43               | 45               |         |

|                       |           |                  |                  |                  |                  |         |
|-----------------------|-----------|------------------|------------------|------------------|------------------|---------|
| Person-years          | 199250    | 201119           | 200919           | 201864           | 202291           |         |
| HR (95% CI), Model 1  | Reference | 0.91 (0.62-1.35) | 0.82 (0.55-1.23) | 0.78 (0.52-1.17) | 0.81 (0.54-1.21) | 0.74    |
| HR (95% CI), Model 2  | Reference | 0.93 (0.63-1.38) | 0.85 (0.57-1.28) | 0.81 (0.54-1.22) | 0.86 (0.57-1.29) | 0.87    |
| Migraine              |           |                  |                  |                  |                  |         |
| Events                | 94        | 71               | 92               | 88               | 88               |         |
| Person-years          | 194800    | 195976           | 195470           | 195418           | 195581           |         |
| HR (95% CI), Model 1  | Reference | 0.72 (0.53-0.98) | 0.92 (0.69-1.23) | 0.86 (0.64-1.16) | 0.84 (0.63-1.13) | 0.31    |
| HR (95% CI), Model 2  | Reference | 0.72 (0.53-0.99) | 0.93 (0.70-1.24) | 0.88 (0.65-1.18) | 0.85 (0.63-1.14) | 0.32    |
| Dementia              |           |                  |                  |                  |                  |         |
| Events                | 131       | 108              | 121              | 98               | 123              |         |
| Person-years          | 200507    | 202427           | 202453           | 203181           | 203630           |         |
| HR (95% CI), Model 1  | Reference | 0.75 (0.58-0.97) | 0.80 (0.62-1.03) | 0.63 (0.49-0.82) | 0.77 (0.60-0.98) | 0.0153  |
| HR (95% CI), Model 2  | Reference | 0.76 (0.59-0.98) | 0.81 (0.63-1.04) | 0.64 (0.49-0.83) | 0.76 (0.59-0.98) | 0.0193  |
| Parkinson's disease   |           |                  |                  |                  |                  |         |
| Events                | 61        | 65               | 54               | 53               | 58               |         |
| Person-years          | 200551    | 202285           | 202217           | 202911           | 203653           |         |
| HR (95% CI), Model 1  | Reference | 1.02 (0.72-1.44) | 0.82 (0.57-1.19) | 0.81 (0.56-1.17) | 0.88 (0.61-1.27) | 0.62    |
| HR (95% CI), Model 2  | Reference | 1.01 (0.71-1.43) | 0.80 (0.56-1.16) | 0.79 (0.54-1.14) | 0.85 (0.59-1.22) | 0.52    |
| Multiple sclerosis    |           |                  |                  |                  |                  |         |
| Events                | 9         | 19               | 7                | 8                | 8                |         |
| Person-years          | 200083    | 201842           | 202043           | 202784           | 203232           |         |
| HR (95% CI), Model 1  | Reference | 2.01 (0.91-4.44) | 0.73 (0.27-1.96) | 0.81 (0.31-2.11) | 0.79 (0.30-2.07) | 0.0485  |
| HR (95% CI), Model 2  | Reference | 2.14 (2.14-2.14) | 0.78 (0.29-2.12) | 0.90 (0.34-2.34) | 0.88 (0.34-2.33) | 0.36    |
| Bronchiectasis        |           |                  |                  |                  |                  |         |
| Events                | 119       | 98               | 81               | 74               | 89               |         |
| Person-years          | 199894    | 201726           | 201747           | 202362           | 203093           |         |
| HR (95% CI), Model 1  | Reference | 0.74 (0.57-0.97) | 0.58 (0.44-0.77) | 0.51 (0.38-0.69) | 0.59 (0.44-0.77) | <0.0001 |
| HR (95% CI), Model 2  | Reference | 0.76 (0.58-1.00) | 0.60 (0.45-0.80) | 0.53 (0.40-0.71) | 0.60 (0.45-0.79) | 0.0001  |
| Asthma                |           |                  |                  |                  |                  |         |
| Events                | 216       | 189              | 186              | 193              | 191              |         |
| Person-years          | 170774    | 173532           | 174805           | 175191           | 176540           |         |
| HR (95% CI), Model 1  | Reference | 0.83 (0.68-1.01) | 0.80 (0.65-0.97) | 0.81 (0.67-0.99) | 0.78 (0.64-0.95) | 0.09214 |
| HR (95% CI), Model 2  | Reference | 0.87 (0.71-1.06) | 0.84 (0.69-1.03) | 0.86 (0.71-1.05) | 0.84 (0.68-1.02) | 0.37073 |
| COPD                  |           |                  |                  |                  |                  |         |
| Events                | 328       | 253              | 243              | 196              | 204              |         |
| Person-years          | 196500    | 198635           | 199167           | 200278           | 200960           |         |
| HR (95% CI), Model 1  | Reference | 0.72 (0.61-0.85) | 0.67 (0.57-0.79) | 0.53 (0.45-0.64) | 0.54 (0.45-0.65) | <0.0001 |
| HR (95% CI), Model 2  | Reference | 0.82 (0.69-0.97) | 0.79 (0.67-0.93) | 0.65 (0.55-0.78) | 0.68 (0.57-0.82) | <0.0001 |
| CKD                   |           |                  |                  |                  |                  |         |
| Events                | 644       | 635              | 571              | 561              | 535              |         |
| Person-years          | 196401    | 197905           | 198645           | 200018           | 200251           |         |
| HR (95% CI), Model 1  | Reference | 0.93 (0.84-1.04) | 0.81 (0.72-0.90) | 0.78 (0.70-0.87) | 0.73 (0.65-0.82) | <0.0001 |
| HR (95% CI), Model 2  | Reference | 0.99 (0.88-1.10) | 0.88 (0.78-0.98) | 0.86 (0.76-0.96) | 0.81 (0.72-0.91) | 0.0009  |
| Chronic liver disease |           |                  |                  |                  |                  |         |
| Events                | 42        | 37               | 33               | 24               | 27               |         |

|                            |           |                  |                  |                  |                  |         |
|----------------------------|-----------|------------------|------------------|------------------|------------------|---------|
| Person-years               | 199713    | 201441           | 201717           | 202300           | 203000           |         |
| HR (95% CI), Model 1       | Reference | 0.89 (0.57-1.39) | 0.80 (0.51-1.27) | 0.59 (0.36-0.98) | 0.68 (0.42-1.10) | 0.26    |
| HR (95% CI), Model 2       | Reference | 0.98 (0.63-1.52) | 0.93 (0.59-1.47) | 0.70 (0.42-1.16) | 0.84 (0.51-1.37) | 0.67    |
| Irritable bowel syndrome   |           |                  |                  |                  |                  |         |
| Events                     | 180       | 145              | 121              | 152              | 159              |         |
| Person-years               | 195187    | 196312           | 197029           | 197184           | 197427           |         |
| HR (95% CI), Model 1       | Reference | 0.75 (0.60-0.93) | 0.61 (0.48-0.76) | 0.74 (0.59-0.92) | 0.75 (0.60-0.92) | 0.0006  |
| HR (95% CI), Model 2       | Reference | 0.78 (0.62-0.97) | 0.63 (0.50-0.80) | 0.78 (0.63-0.97) | 0.79 (0.64-0.98) | 0.0037  |
| Inflammatory bowel disease |           |                  |                  |                  |                  |         |
| Events                     | 64        | 56               | 54               | 57               | 53               |         |
| Person-years               | 198107    | 200072           | 200645           | 201326           | 202140           |         |
| HR (95% CI), Model 1       | Reference | 0.87 (0.61-1.24) | 0.83 (0.58-1.20) | 0.88 (0.61-1.26) | 0.82 (0.56-1.18) | 0.83    |
| HR (95% CI), Model 2       | Reference | 0.89 (0.62-1.27) | 0.85 (0.59-1.23) | 0.90 (0.62-1.29) | 0.81 (0.56-1.18) | 0.86    |
| Treated constipation       |           |                  |                  |                  |                  |         |
| Events                     | 472       | 471              | 413              | 403              | 479              |         |
| Person-years               | 195147    | 197847           | 197820           | 198707           | 199045           |         |
| HR (95% CI), Model 1       | Reference | 0.94 (0.83-1.07) | 0.80 (0.70-0.91) | 0.77 (0.67-0.88) | 0.90 (0.79-1.02) | 0.0004  |
| HR (95% CI), Model 2       | Reference | 0.96 (0.84-1.09) | 0.82 (0.72-0.94) | 0.79 (0.69-0.91) | 0.92 (0.81-1.05) | 0.0020  |
| Dyspepsia                  |           |                  |                  |                  |                  |         |
| Events                     | 1181      | 1108             | 1104             | 1100             | 1129             |         |
| Person-years               | 166511    | 170552           | 172920           | 172989           | 173540           |         |
| HR (95% CI), Model 1       | Reference | 0.88 (0.81-0.96) | 0.85 (0.78-0.92) | 0.84 (0.77-0.91) | 0.84 (0.78-0.91) | <0.0001 |
| HR (95% CI), Model 2       | Reference | 0.91 (0.84-0.99) | 0.89 (0.81-0.96) | 0.88 (0.81-0.96) | 0.89 (0.82-0.97) | 0.0137  |
| Diverticular disease       |           |                  |                  |                  |                  |         |
| Events                     | 1073      | 1017             | 991              | 922              | 895              |         |
| Person-years               | 184762    | 187365           | 188552           | 189632           | 190856           |         |
| HR (95% CI), Model 1       | Reference | 0.90 (0.83-0.99) | 0.86 (0.79-0.94) | 0.79 (0.72-0.86) | 0.75 (0.68-0.82) | <0.0001 |
| HR (95% CI), Model 2       | Reference | 0.94 (0.86-1.03) | 0.91 (0.83-0.99) | 0.85 (0.78-0.93) | 0.82 (0.75-0.90) | <0.0001 |
| Pernicious anaemia         |           |                  |                  |                  |                  |         |
| Events                     | 26        | 15               | 16               | 12               | 16               |         |
| Person-years               | 200375    | 202167           | 202258           | 202926           | 203375           |         |
| HR (95% CI), Model 1       | Reference | 0.54 (0.28-1.01) | 0.55 (0.30-1.03) | 0.40 (0.20-0.80) | 0.51 (0.27-0.96) | 0.0575  |
| HR (95% CI), Model 2       | Reference | 0.56 (0.29-1.05) | 0.58 (0.31-1.08) | 0.43 (0.21-0.85) | 0.54 (0.29-1.03) | 0.10    |
| Fracture                   |           |                  |                  |                  |                  |         |
| Events                     | 96        | 98               | 103              | 107              | 113              |         |
| Person-years               | 199295    | 201251           | 201245           | 201919           | 202274           |         |
| HR (95% CI), Model 1       | Reference | 0.93 (0.70-1.23) | 0.93 (0.70-1.23) | 0.94 (0.71-1.24) | 0.95 (0.72-1.25) | 0.98    |
| HR (95% CI), Model 2       | Reference | 0.93 (0.70-1.23) | 0.92 (0.70-1.22) | 0.93 (0.71-1.23) | 0.93 (0.71-1.23) | 0.98    |
| Osteoporosis               |           |                  |                  |                  |                  |         |
| Events                     | 801       | 773              | 739              | 690              | 729              |         |
| Person-years               | 177636    | 179859           | 179836           | 179958           | 181100           |         |
| HR (95% CI), Model 1       | Reference | 0.89 (0.81-0.98) | 0.82 (0.74-0.90) | 0.75 (0.67-0.83) | 0.76 (0.69-0.84) | <0.0001 |
| HR (95% CI), Model 2       | Reference | 0.93 (0.84-1.02) | 0.87 (0.79-0.96) | 0.80 (0.72-0.89) | 0.83 (0.75-0.92) | 0.0002  |
| Meniere's disease          |           |                  |                  |                  |                  |         |

|                                 |           |                  |                  |                  |                  |        |
|---------------------------------|-----------|------------------|------------------|------------------|------------------|--------|
| Events                          | 12        | 11               | 5                | 13               | 16               |        |
| Person-years                    | 200332    | 202146           | 202196           | 202730           | 203415           |        |
| HR (95% CI), Model 1            | Reference | 0.87 (0.38-1.98) | 0.39 (0.14-1.10) | 0.99 (0.45-2.18) | 1.18 (0.55-2.51) | 0.30   |
| HR (95% CI), Model 2            | Reference | 0.90 (0.40-2.04) | 0.41 (0.14-1.17) | 1.05 (0.47-2.32) | 1.28 (0.60-2.76) | 0.28   |
| Eczema                          |           |                  |                  |                  |                  |        |
| Events                          | 198       | 167              | 159              | 133              | 165              |        |
| Person-years                    | 191378    | 193657           | 193824           | 194851           | 194944           |        |
| HR (95% CI), Model 1            | Reference | 0.81 (0.66-1.00) | 0.76 (0.62-0.94) | 0.63 (0.51-0.79) | 0.77 (0.63-0.95) | 0.0014 |
| HR (95% CI), Model 2            | Reference | 0.83 (0.67-1.02) | 0.78 (0.64-0.97) | 0.65 (0.52-0.81) | 0.80 (0.64-0.98) | 0.0052 |
| Glaucoma                        |           |                  |                  |                  |                  |        |
| Events                          | 201       | 224              | 210              | 242              | 260              |        |
| Person-years                    | 197761    | 199216           | 199302           | 199712           | 200227           |        |
| HR (95% CI), Model 1            | Reference | 1.05 (0.87-1.27) | 0.95 (0.78-1.15) | 1.08 (0.89-1.30) | 1.13 (0.94-1.36) | 0.37   |
| HR (95% CI), Model 2            | Reference | 1.05 (0.87-1.27) | 0.94 (0.78-1.15) | 1.07 (0.89-1.30) | 1.12 (0.92-1.35) | 0.44   |
| Cataract                        |           |                  |                  |                  |                  |        |
| Events                          | 964       | 1027             | 1026             | 1046             | 1113             |        |
| Person-years                    | 189353    | 190821           | 190535           | 190702           | 190279           |        |
| HR (95% CI), Model 1            | Reference | 0.96 (0.88-1.04) | 0.91 (0.83-0.99) | 0.90 (0.82-0.98) | 0.92 (0.84-1.00) | 0.11   |
| HR (95% CI), Model 2            | Reference | 0.98 (0.89-1.07) | 0.93 (0.85-1.01) | 0.92 (0.84-1.01) | 0.93 (0.85-1.02) | 0.26   |
| AMD                             |           |                  |                  |                  |                  |        |
| Events                          | 164       | 178              | 196              | 186              | 199              |        |
| Person-years                    | 199649    | 201311           | 201411           | 201853           | 202333           |        |
| HR (95% CI), Model 1            | Reference | 0.98 (0.79-1.21) | 1.02 (0.82-1.25) | 0.93 (0.76-1.15) | 0.95 (0.77-1.17) | 0.93   |
| HR (95% CI), Model 2            | Reference | 1.00 (0.81-1.24) | 1.05 (0.85-1.29) | 0.97 (0.78-1.20) | 0.98 (0.79-1.21) | 0.94   |
| Thyroid disorders               |           |                  |                  |                  |                  |        |
| Events                          | 264       | 244              | 291              | 307              | 288              |        |
| Person-years                    | 188652    | 189729           | 189023           | 188761           | 188212           |        |
| HR (95% CI), Model 1            | Reference | 0.86 (0.72-1.02) | 1.00 (0.85-1.18) | 1.03 (0.88-1.22) | 0.94 (0.80-1.12) | 0.23   |
| HR (95% CI), Model 2            | Reference | 0.88 (0.74-1.05) | 1.04 (0.88-1.24) | 1.09 (0.92-1.29) | 1.01 (0.85-1.19) | 0.18   |
| Prostate disorders <sup>†</sup> |           |                  |                  |                  |                  |        |
| Events                          | 477       | 459              | 429              | 421              | 359              |        |
| Person-years                    | 100393    | 87890            | 83287            | 77248            | 70648            |        |
| HR (95% CI), Model 1            | Reference | 1.03 (0.90-1.17) | 0.97 (0.85-1.11) | 1.02 (0.90-1.17) | 0.94 (0.82-1.08) | 0.72   |
| HR (95% CI), Model 2            | Reference | 1.03 (0.91-1.17) | 0.97 (0.85-1.11) | 1.03 (0.90-1.17) | 0.95 (0.82-1.09) | 0.72   |

AMD, age related macular degeneration; CI, confidence interval; CKD, chronic kidney disease; COPD, chronic obstructive pulmonary disease; HR, hazard ratio.

\*Cox proportional hazard regression models were used to examine associations of the Alternate Healthy Eating Index-2010 (quintiles) with the incidence of individual chronic diseases. The statistical tests were two-sided. Model 1 was adjusted for age and sex; Model 2 was adjusted for Model 1 plus ethnicity, education, income, smoking, alcohol consumption, sleep, physical activity, and GRS for longevity; Model 3 was adjusted for Model 2 and total energy intake.

<sup>†</sup>Cardiovascular disease includes coronary heart disease, heart failure, atrial fibrillation, other cardiac disease, stroke, and peripheral vascular disease.

‡All cancers encompass any type of cancer except for non-melanoma skin cancer.

§These analyses were conducted among women only.

¶These analyses were conducted among men only.

**Table S8. The association between the Healthful Plant-based Diet Index and the incidence of individual chronic diseases among individuals by excluding those developed the corresponding disease in the first 4 years of follow-up**

|                                           | Healthful Plant-based Diet Index |                  |                  |                  |                  | P-value |
|-------------------------------------------|----------------------------------|------------------|------------------|------------------|------------------|---------|
|                                           | Quintile 1                       | Quintile 2       | Quintile 3       | Quintile 4       | Quintile 5       |         |
| <b>Cardiovascular disease<sup>†</sup></b> |                                  |                  |                  |                  |                  |         |
| Events                                    | 1365                             | 362              | 1290             | 1124             | 951              |         |
| Person-years                              | 228447                           | 68654            | 238025           | 211185           | 192760           |         |
| HR (95% CI), Model 1                      | Reference                        | 0.86 (0.77-0.97) | 0.89 (0.82-0.96) | 0.90 (0.83-0.97) | 0.86 (0.79-0.94) | 0.0036  |
| HR (95% CI), Model 2                      | Reference                        | 0.89 (0.79-0.99) | 0.93 (0.86-1.00) | 0.95 (0.87-1.03) | 0.93 (0.85-1.01) | 0.19    |
| <b>Coronary heart disease</b>             |                                  |                  |                  |                  |                  |         |
| Events                                    | 825                              | 225              | 757              | 648              | 526              |         |
| Person-years                              | 239071                           | 71712            | 247586           | 219857           | 199549           |         |
| HR (95% CI), Model 1                      | Reference                        | 0.90 (0.78-1.04) | 0.89 (0.81-0.99) | 0.90 (0.81-1.00) | 0.85 (0.76-0.95) | 0.0466  |
| HR (95% CI), Model 2                      | Reference                        | 0.93 (0.80-1.08) | 0.94 (0.85-1.04) | 0.96 (0.86-1.07) | 0.93 (0.83-1.04) | 0.66    |
| <b>Heart failure</b>                      |                                  |                  |                  |                  |                  |         |
| Events                                    | 306                              | 86               | 270              | 217              | 186              |         |
| Person-years                              | 247756                           | 73857            | 255186           | 225479           | 204344           |         |
| HR (95% CI), Model 1                      | Reference                        | 0.92 (0.72-1.16) | 0.84 (0.71-0.99) | 0.79 (0.66-0.94) | 0.79 (0.65-0.95) | 0.0452  |
| HR (95% CI), Model 2                      | Reference                        | 0.97 (0.76-1.23) | 0.92 (0.78-1.09) | 0.88 (0.74-1.05) | 0.92 (0.76-1.12) | 0.71    |
| <b>Atrial fibrillation</b>                |                                  |                  |                  |                  |                  |         |
| Events                                    | 124                              | 29               | 111              | 96               | 72               |         |
| Person-years                              | 243406                           | 72769            | 251583           | 222168           | 201718           |         |
| HR (95% CI), Model 1                      | Reference                        | 0.78 (0.52-1.17) | 0.88 (0.68-1.14) | 0.92 (0.70-1.20) | 0.82 (0.61-1.11) | 0.63    |
| HR (95% CI), Model 2                      | Reference                        | 0.80 (0.53-1.20) | 0.93 (0.72-1.20) | 0.98 (0.74-1.28) | 0.90 (0.66-1.22) | 0.83    |
| <b>Other cardiac disease</b>              |                                  |                  |                  |                  |                  |         |
| Events                                    | 686                              | 212              | 655              | 586              | 488              |         |
| Person-years                              | 244109                           | 72922            | 252115           | 223121           | 202199           |         |
| HR (95% CI), Model 1                      | Reference                        | 1.00 (0.86-1.17) | 0.90 (0.81-1.00) | 0.93 (0.83-1.04) | 0.88 (0.78-0.99) | 0.16    |
| HR (95% CI), Model 2                      | Reference                        | 1.03 (0.88-1.20) | 0.95 (0.85-1.06) | 0.99 (0.88-1.11) | 0.96 (0.85-1.09) | 0.78    |
| <b>Stroke</b>                             |                                  |                  |                  |                  |                  |         |
| Events                                    | 46                               | 13               | 46               | 54               | 28               |         |
| Person-years                              | 247592                           | 74001            | 255493           | 225328           | 204075           |         |
| HR (95% CI), Model 1                      | Reference                        | 0.92 (0.49-1.70) | 0.94 (0.62-1.41) | 1.27 (0.85-1.90) | 0.75 (0.46-1.22) | 0.23    |
| HR (95% CI), Model 2                      | Reference                        | 0.94 (0.51-1.75) | 0.98 (0.65-1.48) | 1.34 (0.89-2.01) | 0.81 (0.50-1.33) | 0.24    |
| <b>Peripheral vascular disease</b>        |                                  |                  |                  |                  |                  |         |
| Events                                    | 162                              | 42               | 151              | 137              | 113              |         |
| Person-years                              | 248182                           | 74083            | 255826           | 225884           | 204371           |         |
| HR (95% CI), Model 1                      | Reference                        | 0.83 (0.59-1.17) | 0.86 (0.69-1.08) | 0.88 (0.70-1.11) | 0.81 (0.63-1.04) | 0.51    |
| HR (95% CI), Model 2                      | Reference                        | 0.85 (0.61-1.19) | 0.88 (0.71-1.11) | 0.91 (0.72-1.16) | 0.85 (0.66-1.09) | 0.71    |
| <b>Hypertension</b>                       |                                  |                  |                  |                  |                  |         |
| Events                                    | 263                              | 81               | 264              | 202              | 172              |         |
| Person-years                              | 176187                           | 53613            | 187406           | 169208           | 158280           |         |
| HR (95% CI), Model 1                      | Reference                        | 0.97 (0.76-1.25) | 0.89 (0.75-1.06) | 0.75 (0.63-0.91) | 0.69 (0.57-0.84) | 0.0015  |

|                                   |           |                  |                  |                  |                  |         |
|-----------------------------------|-----------|------------------|------------------|------------------|------------------|---------|
| HR (95% CI), Model 2              | Reference | 1.01 (0.79-1.30) | 0.96 (0.81-1.14) | 0.83 (0.68-1.00) | 0.79 (0.64-0.97) | 0.0778  |
| <b>Diabetes</b>                   |           |                  |                  |                  |                  |         |
| Events                            | 514       | 139              | 414              | 279              | 238              |         |
| Person-years                      | 236120    | 71131            | 245563           | 217514           | 197777           |         |
| HR (95% CI), Model 1              | Reference | 0.89 (0.74-1.07) | 0.77 (0.68-0.88) | 0.60 (0.51-0.69) | 0.57 (0.49-0.67) | <0.0001 |
| HR (95% CI), Model 2              | Reference | 0.98 (0.81-1.18) | 0.91 (0.79-1.03) | 0.73 (0.63-0.85) | 0.77 (0.65-0.90) | 0.0003  |
| <b>All cancers<sup>‡</sup></b>    |           |                  |                  |                  |                  |         |
| Events                            | 953       | 279              | 899              | 815              | 695              |         |
| Person-years                      | 224686    | 67321            | 232247           | 205322           | 187301           |         |
| HR (95% CI), Model 1              | Reference | 0.94 (0.83-1.08) | 0.87 (0.79-0.95) | 0.89 (0.81-0.98) | 0.84 (0.76-0.93) | 0.0064  |
| HR (95% CI), Model 2              | Reference | 0.97 (0.85-1.11) | 0.90 (0.82-0.99) | 0.93 (0.84-1.02) | 0.90 (0.81-1.00) | 0.16    |
| <b>Non-melanoma skin cancer</b>   |           |                  |                  |                  |                  |         |
| Events                            | 553       | 183              | 569              | 496              | 457              |         |
| Person-years                      | 242019    | 72361            | 248886           | 220084           | 199441           |         |
| HR (95% CI), Model 1              | Reference | 1.07 (0.91-1.27) | 0.97 (0.86-1.09) | 0.97 (0.86-1.10) | 1.02 (0.90-1.16) | 0.74    |
| HR (95% CI), Model 2              | Reference | 1.06 (0.90-1.26) | 0.95 (0.85-1.07) | 0.95 (0.84-1.08) | 0.99 (0.87-1.13) | 0.66    |
| <b>Melanoma</b>                   |           |                  |                  |                  |                  |         |
| Events                            | 71        | 21               | 77               | 65               | 61               |         |
| Person-years                      | 247278    | 73667            | 254369           | 224156           | 202980           |         |
| HR (95% CI), Model 1              | Reference | 0.96 (0.59-1.57) | 1.01 (0.73-1.40) | 0.96 (0.68-1.36) | 1.01 (0.70-1.44) | 1.00    |
| HR (95% CI), Model 2              | Reference | 0.96 (0.59-1.56) | 1.01 (0.73-1.39) | 0.96 (0.68-1.35) | 1.01 (0.71-1.43) | 1.00    |
| <b>Lung cancer</b>                |           |                  |                  |                  |                  |         |
| Events                            | 95        | 40               | 81               | 80               | 71               |         |
| Person-years                      | 248965    | 74184            | 256380           | 226423           | 204903           |         |
| HR (95% CI), Model 1              | Reference | 1.33 (0.92-1.93) | 0.76 (0.56-1.03) | 0.84 (0.62-1.13) | 0.82 (0.60-1.13) | 0.0371  |
| HR (95% CI), Model 2              | Reference | 1.41 (0.99-2.00) | 0.88 (0.67-1.17) | 0.91 (0.68-1.22) | 0.95 (0.70-1.29) | 0.12    |
| <b>Stomach cancer</b>             |           |                  |                  |                  |                  |         |
| Events                            | 21        | 7                | 26               | 12               | 12               |         |
| Person-years                      | 249592    | 74475            | 257049           | 226875           | 205304           |         |
| HR (95% CI), Model 1              | Reference | 1.16 (0.49-2.72) | 1.30 (0.73-2.33) | 0.74 (0.36-1.51) | 0.90 (0.43-1.87) | 0.54    |
| HR (95% CI), Model 2              | Reference | 1.22 (0.52-2.86) | 1.40 (0.78-2.51) | 0.81 (0.39-1.67) | 1.02 (0.48-2.13) | 0.56    |
| <b>Oesophageal cancer</b>         |           |                  |                  |                  |                  |         |
| Events                            | 32        | 7                | 20               | 23               | 22               |         |
| Person-years                      | 249482    | 74463            | 256929           | 226906           | 205306           |         |
| HR (95% CI), Model 1              | Reference | 0.74 (0.33-1.69) | 0.64 (0.36-1.12) | 0.88 (0.51-1.53) | 1.01 (0.57-1.79) | 0.52    |
| HR (95% CI), Model 2              | Reference | 0.81 (0.36-1.84) | 0.73 (0.42-1.29) | 1.05 (0.61-1.83) | 1.30 (0.73-2.31) | 0.44    |
| <b>Colon cancer</b>               |           |                  |                  |                  |                  |         |
| Events                            | 134       | 29               | 119              | 112              | 78               |         |
| Person-years                      | 247505    | 73849            | 254964           | 225447           | 204301           |         |
| HR (95% CI), Model 1              | Reference | 0.70 (0.47-1.05) | 0.83 (0.65-1.07) | 0.90 (0.69-1.16) | 0.71 (0.53-0.94) | 0.13    |
| HR (95% CI), Model 2              | Reference | 0.73 (0.48-1.08) | 0.87 (0.67-1.11) | 0.94 (0.73-1.22) | 0.76 (0.57-1.02) | 0.26    |
| <b>Ovarian cancer<sup>§</sup></b> |           |                  |                  |                  |                  |         |
| Events                            | 29        | 11               | 30               | 35               | 24               |         |
| Person-years                      | 113238    | 38717            | 148118           | 147574           | 147728           |         |

|                                     |           |                  |                  |                  |                  |        |
|-------------------------------------|-----------|------------------|------------------|------------------|------------------|--------|
| HR (95% CI), Model 1                | Reference | 1.07 (0.54-2.15) | 0.75 (0.45-1.25) | 0.86 (0.52-1.42) | 0.59 (0.34-1.03) | 0.32   |
| HR (95% CI), Model 2                | Reference | 1.09 (0.54-2.19) | 0.77 (0.46-1.29) | 0.89 (0.54-1.48) | 0.62 (0.36-1.09) | 0.42   |
| <b>Breast cancer<sup>§</sup></b>    |           |                  |                  |                  |                  |        |
| Events                              | 201       | 82               | 245              | 269              | 247              |        |
| Person-years                        | 106347    | 36576            | 138852           | 138149           | 138765           |        |
| HR (95% CI), Model 1                | Reference | 1.18 (0.91-1.53) | 0.93 (0.77-1.12) | 1.03 (0.85-1.24) | 0.95 (0.78-1.14) | 0.35   |
| HR (95% CI), Model 2                | Reference | 1.20 (0.93-1.55) | 0.95 (0.79-1.15) | 1.07 (0.89-1.29) | 1.00 (0.82-1.21) | 0.39   |
| <b>Prostate cancer<sup>¶</sup></b>  |           |                  |                  |                  |                  |        |
| Events                              | 397       | 90               | 368              | 280              | 174              |        |
| Person-years                        | 145266    | 38311            | 117478           | 86364            | 63739            |        |
| HR (95% CI), Model 1                | Reference | 0.82 (0.66-1.04) | 1.08 (0.94-1.25) | 1.12 (0.96-1.31) | 0.94 (0.79-1.13) | 0.0577 |
| HR (95% CI), Model 2                | Reference | 0.81 (0.65-1.02) | 1.05 (0.91-1.21) | 1.08 (0.93-1.27) | 0.90 (0.75-1.08) | 0.0717 |
| <b>Other cancers</b>                |           |                  |                  |                  |                  |        |
| Events                              | 848       | 252              | 779              | 694              | 605              |        |
| Person-years                        | 229113    | 68801            | 236711           | 209469           | 190390           |        |
| HR (95% CI), Model 1                | Reference | 0.95 (0.83-1.10) | 0.85 (0.77-0.93) | 0.85 (0.77-0.94) | 0.82 (0.74-0.92) | 0.0011 |
| HR (95% CI), Model 2                | Reference | 0.98 (0.85-1.13) | 0.88 (0.79-0.97) | 0.89 (0.80-0.98) | 0.88 (0.79-0.98) | 0.0413 |
| <b>Depression</b>                   |           |                  |                  |                  |                  |        |
| Events                              | 78        | 23               | 65               | 72               | 44               |        |
| Person-years                        | 234343    | 70078            | 241799           | 213814           | 194057           |        |
| HR (95% CI), Model 1                | Reference | 0.99 (0.62-1.57) | 0.80 (0.58-1.12) | 1.00 (0.72-1.39) | 0.67 (0.46-0.98) | 0.18   |
| HR (95% CI), Model 2                | Reference | 1.04 (0.65-1.66) | 0.86 (0.62-1.20) | 1.09 (0.78-1.52) | 0.75 (0.51-1.11) | 0.31   |
| <b>Anxiety</b>                      |           |                  |                  |                  |                  |        |
| Events                              | 498       | 167              | 530              | 474              | 391              |        |
| Person-years                        | 241634    | 72266            | 249037           | 220114           | 199310           |        |
| HR (95% CI), Model 1                | Reference | 1.07 (0.90-1.28) | 0.95 (0.84-1.08) | 0.92 (0.81-1.05) | 0.82 (0.71-0.94) | 0.0168 |
| HR (95% CI), Model 2                | Reference | 1.10 (0.92-1.31) | 0.99 (0.88-1.13) | 0.98 (0.86-1.11) | 0.87 (0.76-1.00) | 0.13   |
| <b>Schizophrenia</b>                |           |                  |                  |                  |                  |        |
| Events                              | 13        | 6                | 20               | 16               | 12               |        |
| Person-years                        | 249060    | 74298            | 256347           | 226343           | 204797           |        |
| HR (95% CI), Model 1                | Reference | 1.56 (0.59-4.12) | 1.52 (0.75-3.08) | 1.41 (0.67-2.97) | 1.21 (0.54-2.72) | 0.79   |
| HR (95% CI), Model 2                | Reference | 1.71 (0.65-4.52) | 1.75 (0.86-3.56) | 1.70 (0.80-3.61) | 1.56 (0.68-3.55) | 0.58   |
| <b>Alcohol use disorder</b>         |           |                  |                  |                  |                  |        |
| Events                              | 158       | 41               | 130              | 102              | 70               |        |
| Person-years                        | 247727    | 73967            | 255388           | 225960           | 204576           |        |
| HR (95% CI), Model 1                | Reference | 0.91 (0.65-1.29) | 0.88 (0.69-1.11) | 0.83 (0.65-1.08) | 0.68 (0.51-0.92) | 0.15   |
| HR (95% CI), Model 2                | Reference | 0.93 (0.66-1.32) | 0.91 (0.72-1.15) | 0.88 (0.68-1.14) | 0.74 (0.55-0.99) | 0.39   |
| <b>Psychoactive substance abuse</b> |           |                  |                  |                  |                  |        |
| Events                              | 21        | 12               | 25               | 20               | 17               |        |
| Person-years                        | 249334    | 74433            | 256748           | 226830           | 205168           |        |
| HR (95% CI), Model 1                | Reference | 2.04 (1.00-4.15) | 1.30 (0.72-2.33) | 1.26 (0.68-2.36) | 1.28 (0.66-2.48) | 0.42   |
| HR (95% CI), Model 2                | Reference | 2.17 (1.07-4.43) | 1.41 (0.78-2.53) | 1.42 (0.76-2.66) | 1.49 (0.76-2.92) | 0.32   |
| <b>Epilepsy</b>                     |           |                  |                  |                  |                  |        |
| Events                              | 64        | 17               | 61               | 51               | 41               |        |



|                              |           |                  |                  |                  |                  |         |
|------------------------------|-----------|------------------|------------------|------------------|------------------|---------|
| Person-years                 | 247554    | 73839            | 254850           | 225383           | 203816           |         |
| HR (95% CI), Model 1         | Reference | 0.87 (0.51-1.49) | 0.91 (0.64-1.29) | 0.86 (0.59-1.26) | 0.78 (0.52-1.17) | 0.83    |
| HR (95% CI), Model 2         | Reference | 0.88 (0.52-1.51) | 0.92 (0.64-1.31) | 0.88 (0.60-1.28) | 0.80 (0.53-1.21) | 0.88    |
| <b>Migraine</b>              |           |                  |                  |                  |                  |         |
| Events                       | 100       | 31               | 111              | 104              | 87               |         |
| Person-years                 | 241595    | 72047            | 248046           | 218242           | 197314           |         |
| HR (95% CI), Model 1         | Reference | 0.99 (0.66-1.49) | 1.00 (0.76-1.31) | 1.02 (0.77-1.35) | 0.90 (0.67-1.21) | 0.94    |
| HR (95% CI), Model 2         | Reference | 0.99 (0.66-1.49) | 1.00 (0.76-1.32) | 1.01 (0.76-1.34) | 0.89 (0.65-1.20) | 0.91    |
| <b>Dementia</b>              |           |                  |                  |                  |                  |         |
| Events                       | 142       | 40               | 158              | 135              | 106              |         |
| Person-years                 | 249337    | 74350            | 256714           | 226680           | 205118           |         |
| HR (95% CI), Model 1         | Reference | 0.88 (0.62-1.25) | 0.98 (0.78-1.24) | 0.95 (0.74-1.20) | 0.84 (0.65-1.09) | 0.69    |
| HR (95% CI), Model 2         | Reference | 0.89 (0.63-1.26) | 1.00 (0.80-1.26) | 0.97 (0.76-1.23) | 0.86 (0.66-1.12) | 0.74    |
| <b>Parkinson's disease</b>   |           |                  |                  |                  |                  |         |
| Events                       | 73        | 19               | 71               | 71               | 57               |         |
| Person-years                 | 249108    | 74391            | 256460           | 226605           | 205053           |         |
| HR (95% CI), Model 1         | Reference | 0.82 (0.49-1.35) | 0.87 (0.63-1.21) | 0.99 (0.71-1.38) | 0.89 (0.62-1.28) | 0.85    |
| HR (95% CI), Model 2         | Reference | 0.81 (0.49-1.34) | 0.86 (0.62-1.20) | 0.97 (0.69-1.36) | 0.88 (0.61-1.27) | 0.85    |
| <b>Multiple sclerosis</b>    |           |                  |                  |                  |                  |         |
| Events                       | 10        | 3                | 15               | 10               | 13               |         |
| Person-years                 | 248786    | 74217            | 256287           | 226159           | 204535           |         |
| HR (95% CI), Model 1         | Reference | 0.96 (0.26-3.50) | 1.34 (0.60-3.02) | 0.97 (0.40-2.37) | 1.33 (0.56-3.13) | 0.88    |
| HR (95% CI), Model 2         | Reference | 1.04 (0.28-3.78) | 1.46 (0.65-3.28) | 1.10 (0.45-2.70) | 1.57 (0.66-3.75) | 0.79    |
| <b>Bronchiectasis</b>        |           |                  |                  |                  |                  |         |
| Events                       | 126       | 28               | 118              | 95               | 94               |         |
| Person-years                 | 248526    | 74124            | 255790           | 225951           | 204430           |         |
| HR (95% CI), Model 1         | Reference | 0.68 (0.45-1.03) | 0.79 (0.62-1.02) | 0.69 (0.53-0.91) | 0.74 (0.56-0.98) | 0.0576  |
| HR (95% CI), Model 2         | Reference | 0.69 (0.46-1.04) | 0.80 (0.62-1.03) | 0.70 (0.53-0.91) | 0.73 (0.55-0.97) | 0.0704  |
| <b>Asthma</b>                |           |                  |                  |                  |                  |         |
| Events                       | 251       | 64               | 253              | 222              | 185              |         |
| Person-years                 | 212702    | 63635            | 220655           | 195877           | 177973           |         |
| HR (95% CI), Model 1         | Reference | 0.84 (0.64-1.10) | 0.94 (0.79-1.12) | 0.91 (0.76-1.10) | 0.83 (0.68-1.02) | 0.41    |
| HR (95% CI), Model 2         | Reference | 0.87 (0.66-1.14) | 0.99 (0.83-1.19) | 0.98 (0.81-1.18) | 0.91 (0.75-1.12) | 0.77    |
| <b>COPD</b>                  |           |                  |                  |                  |                  |         |
| Events                       | 348       | 104              | 329              | 254              | 189              |         |
| Person-years                 | 244311    | 73051            | 252322           | 223401           | 202455           |         |
| HR (95% CI), Model 1         | Reference | 0.94 (0.75-1.17) | 0.84 (0.72-0.98) | 0.72 (0.61-0.86) | 0.60 (0.50-0.72) | <0.0001 |
| HR (95% CI), Model 2         | Reference | 1.01 (0.81-1.25) | 0.93 (0.80-1.08) | 0.81 (0.69-0.96) | 0.69 (0.57-0.83) | 0.0009  |
| <b>CKD</b>                   |           |                  |                  |                  |                  |         |
| Events                       | 857       | 255              | 774              | 619              | 441              |         |
| Person-years                 | 243430    | 72791            | 251746           | 223026           | 202227           |         |
| HR (95% CI), Model 1         | Reference | 0.94 (0.82-1.08) | 0.81 (0.74-0.90) | 0.73 (0.66-0.81) | 0.58 (0.52-0.65) | <0.0001 |
| HR (95% CI), Model 2         | Reference | 1.00 (0.87-1.15) | 0.89 (0.81-0.98) | 0.82 (0.73-0.91) | 0.68 (0.60-0.77) | <0.0001 |
| <b>Chronic liver disease</b> |           |                  |                  |                  |                  |         |
| Events                       | 58        | 11               | 37               | 36               | 21               |         |

|                            |           |                  |                  |                  |                  |         |
|----------------------------|-----------|------------------|------------------|------------------|------------------|---------|
| Person-years               | 247935    | 74108            | 255688           | 226053           | 204387           |         |
| HR (95% CI), Model 1       | Reference | 0.62 (0.33-1.18) | 0.60 (0.40-0.92) | 0.67 (0.43-1.02) | 0.43 (0.26-0.72) | 0.0138  |
| HR (95% CI), Model 2       | Reference | 0.69 (0.36-1.31) | 0.71 (0.47-1.08) | 0.82 (0.53-1.25) | 0.58 (0.34-0.97) | 0.24    |
| Irritable bowel syndrome   |           |                  |                  |                  |                  |         |
| Events                     | 196       | 59               | 198              | 172              | 132              |         |
| Person-years               | 241817    | 72249            | 249162           | 220119           | 199791           |         |
| HR (95% CI), Model 1       | Reference | 0.94 (0.70-1.26) | 0.87 (0.72-1.07) | 0.81 (0.66-1.00) | 0.65 (0.52-0.82) | 0.0057  |
| HR (95% CI), Model 2       | Reference | 0.97 (0.73-1.30) | 0.92 (0.75-1.13) | 0.86 (0.70-1.07) | 0.71 (0.56-0.89) | 0.0536  |
| Inflammatory bowel disease |           |                  |                  |                  |                  |         |
| Events                     | 79        | 19               | 62               | 69               | 55               |         |
| Person-years               | 245953    | 73587            | 254014           | 225149           | 203587           |         |
| HR (95% CI), Model 1       | Reference | 0.80 (0.49-1.33) | 0.76 (0.54-1.07) | 0.96 (0.69-1.34) | 0.85 (0.59-1.22) | 0.52    |
| HR (95% CI), Model 2       | Reference | 0.81 (0.49-1.34) | 0.77 (0.55-1.08) | 0.98 (0.70-1.36) | 0.87 (0.60-1.25) | 0.56    |
| Treated constipation       |           |                  |                  |                  |                  |         |
| Events                     | 577       | 154              | 566              | 515              | 426              |         |
| Person-years               | 243364    | 72546            | 250588           | 221443           | 200625           |         |
| HR (95% CI), Model 1       | Reference | 0.86 (0.72-1.03) | 0.90 (0.80-1.02) | 0.92 (0.82-1.04) | 0.85 (0.74-0.97) | 0.12    |
| HR (95% CI), Model 2       | Reference | 0.88 (0.73-1.05) | 0.93 (0.82-1.04) | 0.95 (0.84-1.07) | 0.88 (0.77-1.00) | 0.32    |
| Dyspepsia                  |           |                  |                  |                  |                  |         |
| Events                     | 1508      | 389              | 1389             | 1252             | 1084             |         |
| Person-years               | 206692    | 62288            | 217243           | 193083           | 177206           |         |
| HR (95% CI), Model 1       | Reference | 0.82 (0.73-0.92) | 0.83 (0.77-0.89) | 0.82 (0.76-0.89) | 0.77 (0.71-0.83) | <0.0001 |
| HR (95% CI), Model 2       | Reference | 0.85 (0.76-0.95) | 0.86 (0.80-0.93) | 0.87 (0.80-0.94) | 0.82 (0.76-0.90) | <0.0001 |
| Diverticular disease       |           |                  |                  |                  |                  |         |
| Events                     | 1349      | 347              | 1223             | 1121             | 858              |         |
| Person-years               | 229380    | 68855            | 238521           | 211049           | 193362           |         |
| HR (95% CI), Model 1       | Reference | 0.83 (0.74-0.93) | 0.83 (0.77-0.90) | 0.86 (0.79-0.93) | 0.71 (0.65-0.78) | <0.0001 |
| HR (95% CI), Model 2       | Reference | 0.85 (0.76-0.96) | 0.87 (0.80-0.94) | 0.91 (0.84-0.99) | 0.77 (0.70-0.84) | <0.0001 |
| Pernicious anaemia         |           |                  |                  |                  |                  |         |
| Events                     | 30        | 6                | 22               | 16               | 11               |         |
| Person-years               | 248894    | 74291            | 256507           | 226510           | 204899           |         |
| HR (95% CI), Model 1       | Reference | 0.63 (0.26-1.52) | 0.65 (0.37-1.13) | 0.51 (0.28-0.96) | 0.38 (0.19-0.78) | 0.0693  |
| HR (95% CI), Model 2       | Reference | 0.67 (0.28-1.61) | 0.70 (0.40-1.22) | 0.57 (0.30-1.06) | 0.43 (0.21-0.89) | 0.17    |
| Fracture                   |           |                  |                  |                  |                  |         |
| Events                     | 118       | 29               | 138              | 109              | 123              |         |
| Person-years               | 247913    | 73874            | 255331           | 225258           | 203608           |         |
| HR (95% CI), Model 1       | Reference | 0.75 (0.50-1.13) | 0.99 (0.77-1.27) | 0.85 (0.65-1.11) | 1.03 (0.80-1.35) | 0.35    |
| HR (95% CI), Model 2       | Reference | 0.74 (0.50-1.12) | 0.97 (0.76-1.24) | 0.82 (0.63-1.07) | 0.98 (0.75-1.28) | 0.36    |
| Osteoporosis               |           |                  |                  |                  |                  |         |
| Events                     | 893       | 293              | 966              | 829              | 751              |         |
| Person-years               | 221662    | 66170            | 227212           | 201279           | 182067           |         |
| HR (95% CI), Model 1       | Reference | 1.02 (0.90-1.17) | 0.95 (0.87-1.04) | 0.88 (0.80-0.97) | 0.87 (0.79-0.96) | 0.0164  |
| HR (95% CI), Model 2       | Reference | 1.08 (0.94-1.23) | 1.03 (0.93-1.12) | 0.98 (0.89-1.08) | 1.00 (0.90-1.11) | 0.66    |
| Meniere's disease          |           |                  |                  |                  |                  |         |

|                                 |           |                  |                  |                  |                  |        |
|---------------------------------|-----------|------------------|------------------|------------------|------------------|--------|
| Events                          | 21        | 2                | 12               | 10               | 12               |        |
| Person-years                    | 249002    | 74360            | 256376           | 226361           | 204719           |        |
| HR (95% CI), Model 1            | Reference | 0.31 (0.07-1.33) | 0.53 (0.26-1.08) | 0.49 (0.23-1.06) | 0.64 (0.30-1.35) | 0.20   |
| HR (95% CI), Model 2            | Reference | 0.32 (0.08-1.38) | 0.57 (0.28-1.17) | 0.53 (0.25-1.16) | 0.73 (0.34-1.55) | 0.30   |
| Eczema                          |           |                  |                  |                  |                  |        |
| Events                          | 205       | 77               | 199              | 182              | 159              |        |
| Person-years                    | 237793    | 71105            | 246038           | 216889           | 196828           |        |
| HR (95% CI), Model 1            | Reference | 1.22 (0.94-1.59) | 0.90 (0.74-1.10) | 0.93 (0.76-1.14) | 0.90 (0.72-1.11) | 0.18   |
| HR (95% CI), Model 2            | Reference | 1.25 (0.96-1.62) | 0.93 (0.76-1.13) | 0.95 (0.78-1.17) | 0.91 (0.73-1.13) | 0.20   |
| Glaucoma                        |           |                  |                  |                  |                  |        |
| Events                          | 262       | 77               | 295              | 265              | 238              |        |
| Person-years                    | 245499    | 73382            | 252759           | 223000           | 201579           |        |
| HR (95% CI), Model 1            | Reference | 0.93 (0.72-1.20) | 1.02 (0.87-1.21) | 1.04 (0.87-1.24) | 1.05 (0.88-1.26) | 0.91   |
| HR (95% CI), Model 2            | Reference | 0.93 (0.72-1.19) | 1.02 (0.86-1.20) | 1.03 (0.86-1.22) | 1.03 (0.86-1.24) | 0.94   |
| Cataract                        |           |                  |                  |                  |                  |        |
| Events                          | 1230      | 361              | 1327             | 1159             | 1099             |        |
| Person-years                    | 234845    | 70176            | 241680           | 213006           | 191983           |        |
| HR (95% CI), Model 1            | Reference | 0.89 (0.79-1.00) | 0.90 (0.84-0.98) | 0.86 (0.79-0.93) | 0.90 (0.82-0.98) | 0.0061 |
| HR (95% CI), Model 2            | Reference | 0.90 (0.80-1.02) | 0.92 (0.85-1.00) | 0.88 (0.81-0.96) | 0.93 (0.85-1.01) | 0.0535 |
| AMD                             |           |                  |                  |                  |                  |        |
| Events                          | 207       | 53               | 227              | 243              | 193              |        |
| Person-years                    | 248057    | 74065            | 255301           | 225367           | 203766           |        |
| HR (95% CI), Model 1            | Reference | 0.78 (0.57-1.05) | 0.92 (0.76-1.12) | 1.08 (0.89-1.31) | 0.94 (0.77-1.15) | 0.18   |
| HR (95% CI), Model 2            | Reference | 0.79 (0.58-1.07) | 0.94 (0.78-1.14) | 1.11 (0.91-1.34) | 0.97 (0.79-1.19) | 0.18   |
| Thyroid disorders               |           |                  |                  |                  |                  |        |
| Events                          | 331       | 94               | 340              | 334              | 295              |        |
| Person-years                    | 234820    | 69849            | 239908           | 210431           | 189368           |        |
| HR (95% CI), Model 1            | Reference | 0.88 (0.70-1.10) | 0.87 (0.75-1.02) | 0.91 (0.78-1.06) | 0.84 (0.71-0.99) | 0.26   |
| HR (95% CI), Model 2            | Reference | 0.91 (0.72-1.14) | 0.92 (0.79-1.08) | 0.98 (0.84-1.15) | 0.94 (0.79-1.11) | 0.80   |
| Prostate disorders <sup>†</sup> |           |                  |                  |                  |                  |        |
| Events                          | 700       | 180              | 549              | 411              | 305              |        |
| Person-years                    | 135226    | 35524            | 108991           | 80111            | 59613            |        |
| HR (95% CI), Model 1            | Reference | 0.93 (0.79-1.09) | 0.90 (0.80-1.00) | 0.91 (0.80-1.02) | 0.90 (0.78-1.03) | 0.30   |
| HR (95% CI), Model 2            | Reference | 0.93 (0.79-1.09) | 0.89 (0.80-1.00) | 0.90 (0.80-1.02) | 0.89 (0.78-1.03) | 0.28   |

AMD, age related macular degeneration; CI, confidence interval; CKD, chronic kidney disease; COPD, chronic obstructive pulmonary disease; HR, hazard ratio.

\*Cox proportional hazard regression models were used to examine associations of the Healthful Plant-based Diet Index (quintiles) with the incidence of individual chronic diseases. The statistical tests were two-sided. Model 1 was adjusted for age and sex; Model 2 was adjusted for Model 1 plus ethnicity, education, income, smoking, alcohol consumption, sleep, physical activity, and GRS for longevity; Model 3 was adjusted for Model 2 and total energy intake.

<sup>†</sup>Cardiovascular disease includes coronary heart disease, heart failure, atrial fibrillation, other cardiac disease, stroke, and peripheral vascular disease.

‡All cancers encompass any type of cancer except for non-melanoma skin cancer.

§These analyses were conducted among women only.

¶These analyses were conducted among men only.

**Table S9. The association between the Alternate Mediterranean Diet Index and the incidence of individual chronic diseases among individuals with 3 or more dietary assessments**

|                                           | Alternate Mediterranean Diet Index |                 |                 |                 |                 | P-value<br>for<br>trend* |
|-------------------------------------------|------------------------------------|-----------------|-----------------|-----------------|-----------------|--------------------------|
|                                           | Quintile 1                         | Quintile 2      | Quintile 3      | Quintile 4      | Quintile 5      |                          |
| <b>Cardiovascular disease<sup>†</sup></b> |                                    |                 |                 |                 |                 |                          |
| Events                                    | 1073                               | 988             | 1103            | 927             | 1263            |                          |
| Person-years                              | 96300.78                           | 99286.92        | 122706.12       | 117017.19       | 161903.5        |                          |
| HR (95% CI), Model 1                      | Reference                          | 0.87(0.80-0.95) | 0.78(0.72-0.85) | 0.69(0.63-0.75) | 0.68(0.63-0.74) | <0.0001                  |
| HR (95% CI), Model 2                      | Reference                          | 0.90(0.83-0.99) | 0.82(0.76-0.90) | 0.74(0.68-0.81) | 0.77(0.71-0.84) | <0.0001                  |
| <b>Coronary heart disease</b>             |                                    |                 |                 |                 |                 |                          |
| Events                                    | 600                                | 521             | 587             | 500             | 642             |                          |
| Person-years                              | 98210.29                           | 101020.41       | 124600.63       | 118577.13       | 164491.35       |                          |
| HR (95% CI), Model 1                      | Reference                          | 0.84(0.74-0.94) | 0.77(0.68-0.86) | 0.70(0.62-0.79) | 0.66(0.59-0.74) | <0.0001                  |
| HR (95% CI), Model 2                      | Reference                          | 0.87(0.77-0.97) | 0.81(0.73-0.91) | 0.77(0.68-0.86) | 0.76(0.68-0.85) | <0.0001                  |
| <b>Heart failure</b>                      |                                    |                 |                 |                 |                 |                          |
| Events                                    | 204                                | 172             | 170             | 163             | 175             |                          |
| Person-years                              | 99647.49                           | 102308.77       | 126056.92       | 119819.96       | 166125.53       |                          |
| HR (95% CI), Model 1                      | Reference                          | 0.80(0.65-0.98) | 0.64(0.52-0.78) | 0.64(0.52-0.79) | 0.50(0.41-0.61) | <0.0001                  |
| HR (95% CI), Model 2                      | Reference                          | 0.85(0.70-1.05) | 0.70(0.57-0.86) | 0.74(0.60-0.91) | 0.62(0.50-0.77) | <0.0001                  |
| <b>Atrial fibrillation</b>                |                                    |                 |                 |                 |                 |                          |
| Events                                    | 213                                | 214             | 219             | 192             | 257             |                          |
| Person-years                              | 98963.74                           | 101557.07       | 125226.41       | 119058.92       | 164963.44       |                          |
| HR (95% CI), Model 1                      | Reference                          | 0.96(0.80-1.16) | 0.80(0.66-0.97) | 0.75(0.61-0.91) | 0.73(0.61-0.88) | 0.0010                   |
| HR (95% CI), Model 2                      | Reference                          | 1.00(0.83-1.21) | 0.84(0.70-1.02) | 0.81(0.66-0.99) | 0.83(0.69-1.01) | 0.0691                   |
| <b>Other cardiac disease</b>              |                                    |                 |                 |                 |                 |                          |
| Events                                    | 452                                | 420             | 427             | 356             | 520             |                          |
| Person-years                              | 99173.11                           | 101789.8        | 125392.84       | 119423.41       | 165484.4        |                          |
| HR (95% CI), Model 1                      | Reference                          | 0.89(0.78-1.02) | 0.73(0.64-0.83) | 0.63(0.55-0.73) | 0.67(0.59-0.76) | <0.0001                  |
| HR (95% CI), Model 2                      | Reference                          | 0.92(0.80-1.05) | 0.77(0.68-0.88) | 0.69(0.60-0.79) | 0.76(0.67-0.87) | <0.0001                  |
| <b>Stroke</b>                             |                                    |                 |                 |                 |                 |                          |
| Events                                    | 96                                 | 83              | 95              | 81              | 87              |                          |
| Person-years                              | 99491.66                           | 102140.04       | 125910.84       | 119714.21       | 165988.42       |                          |
| HR (95% CI), Model 1                      | Reference                          | 0.83(0.62-1.11) | 0.77(0.58-1.02) | 0.69(0.51-0.92) | 0.53(0.40-0.71) | 0.0007                   |
| HR (95% CI), Model 2                      | Reference                          | 0.85(0.63-1.14) | 0.79(0.60-1.06) | 0.72(0.53-0.97) | 0.57(0.42-0.77) | 0.0055                   |
| <b>Peripheral vascular disease</b>        |                                    |                 |                 |                 |                 |                          |
| Events                                    | 105                                | 104             | 112             | 80              | 122             |                          |
| Person-years                              | 99558.21                           | 102199.82       | 125987.12       | 119757.91       | 165932.93       |                          |
| HR (95% CI), Model 1                      | Reference                          | 0.95(0.72-1.25) | 0.82(0.63-1.07) | 0.61(0.46-0.82) | 0.67(0.52-0.88) | 0.0017                   |
| HR (95% CI), Model 2                      | Reference                          | 1.01(0.77-1.32) | 0.89(0.68-1.16) | 0.67(0.50-0.91) | 0.76(0.58-1.00) | 0.0276                   |
| <b>Hypertension</b>                       |                                    |                 |                 |                 |                 |                          |
| Events                                    | 506                                | 386             | 485             | 405             | 551             |                          |
| Person-years                              | 75081.5                            | 77072.52        | 96948.12        | 94197.29        | 132371.73       |                          |
| HR (95% CI), Model 1                      | Reference                          | 0.73(0.64-0.84) | 0.72(0.63-0.81) | 0.62(0.54-0.70) | 0.59(0.52-0.67) | <0.0001                  |
| HR (95% CI), Model 2                      | Reference                          | 0.77(0.67-0.88) | 0.78(0.69-0.88) | 0.69(0.61-0.79) | 0.72(0.64-0.82) | <0.0001                  |

|                             |           |                 |                 |                 |                 |         |
|-----------------------------|-----------|-----------------|-----------------|-----------------|-----------------|---------|
| Diabetes                    |           |                 |                 |                 |                 |         |
| Events                      | 313       | 313             | 300             | 246             | 302             |         |
| Person-years                | 95715.44  | 98378.37        | 122204.43       | 116312.4        | 162278.07       |         |
| HR (95% CI), Model 1        | Reference | 0.97(0.83-1.13) | 0.75(0.64-0.88) | 0.65(0.55-0.77) | 0.57(0.49-0.67) | <0.0001 |
| HR (95% CI), Model 2        | Reference | 1.11(0.95-1.30) | 0.89(0.76-1.05) | 0.84(0.71-1.00) | 0.86(0.73-1.02) | 0.0041  |
| All cancers <sup>‡</sup>    |           |                 |                 |                 |                 |         |
| Events                      | 724       | 714             | 764             | 667             | 922             |         |
| Person-years                | 93092.95  | 95613.82        | 118362.56       | 111809.26       | 155639.36       |         |
| HR (95% CI), Model 1        | Reference | 0.94(0.85-1.04) | 0.79(0.72-0.88) | 0.72(0.65-0.80) | 0.70(0.64-0.78) | <0.0001 |
| HR (95% CI), Model 2        | Reference | 0.97(0.87-1.07) | 0.83(0.75-0.92) | 0.76(0.69-0.85) | 0.77(0.70-0.85) | <0.0001 |
| Non-melanoma skin cancer    |           |                 |                 |                 |                 |         |
| Events                      | 366       | 365             | 448             | 435             | 605             |         |
| Person-years                | 98505.79  | 101036.38       | 124417.01       | 118208.71       | 163817.43       |         |
| HR (95% CI), Model 1        | Reference | 0.96(0.83-1.11) | 0.95(0.83-1.09) | 0.97(0.84-1.12) | 0.97(0.85-1.11) | 0.96    |
| HR (95% CI), Model 2        | Reference | 0.94(0.81-1.08) | 0.93(0.81-1.07) | 0.94(0.81-1.08) | 0.92(0.80-1.05) | 0.80    |
| Melanoma                    |           |                 |                 |                 |                 |         |
| Events                      | 46        | 54              | 62              | 51              | 82              |         |
| Person-years                | 99149.78  | 101464.39       | 125067.25       | 118519.64       | 164768.18       |         |
| HR (95% CI), Model 1        | Reference | 1.14(0.77-1.68) | 1.04(0.71-1.53) | 0.90(0.60-1.35) | 1.03(0.72-1.49) | 0.83    |
| HR (95% CI), Model 2        | Reference | 1.13(0.76-1.67) | 1.03(0.71-1.52) | 0.90(0.60-1.34) | 1.03(0.71-1.49) | 0.84    |
| Lung cancer                 |           |                 |                 |                 |                 |         |
| Events                      | 101       | 82              | 58              | 53              | 81              |         |
| Person-years                | 99751.03  | 102423.85       | 126225.27       | 119912.35       | 166287.64       |         |
| HR (95% CI), Model 1        | Reference | 0.77(0.57-1.03) | 0.43(0.31-0.59) | 0.40(0.29-0.56) | 0.43(0.32-0.58) | <0.0001 |
| HR (95% CI), Model 2        | Reference | 0.93(0.70-1.23) | 0.62(0.46-0.84) | 0.59(0.43-0.81) | 0.71(0.53-0.95) | 0.0014  |
| Stomach cancer              |           |                 |                 |                 |                 |         |
| Events                      | 19        | 21              | 24              | 14              | 20              |         |
| Person-years                | 99763.35  | 102414.06       | 126225.4        | 119939.01       | 166254.37       |         |
| HR (95% CI), Model 1        | Reference | 1.09(0.58-2.02) | 1.04(0.57-1.90) | 0.66(0.33-1.32) | 0.71(0.38-1.34) | 0.42    |
| HR (95% CI), Model 2        | Reference | 1.12(0.60-2.08) | 1.08(0.59-1.98) | 0.70(0.35-1.41) | 0.79(0.41-1.50) | 0.58    |
| Oesophageal cancer          |           |                 |                 |                 |                 |         |
| Events                      | 30        | 24              | 22              | 19              | 25              |         |
| Person-years                | 99763.53  | 102433.51       | 126209.43       | 119965.29       | 166323.06       |         |
| HR (95% CI), Model 1        | Reference | 0.77(0.45-1.32) | 0.59(0.34-1.02) | 0.54(0.30-0.97) | 0.53(0.31-0.91) | 0.11    |
| HR (95% CI), Model 2        | Reference | 0.83(0.49-1.43) | 0.65(0.37-1.13) | 0.63(0.35-1.13) | 0.68(0.39-1.18) | 0.44    |
| Colon cancer                |           |                 |                 |                 |                 |         |
| Events                      | 98        | 95              | 91              | 92              | 127             |         |
| Person-years                | 99223.05  | 101997.74       | 125831.18       | 119479.93       | 165743.08       |         |
| HR (95% CI), Model 1        | Reference | 0.92(0.70-1.22) | 0.71(0.53-0.94) | 0.75(0.56-1.00) | 0.74(0.57-0.97) | 0.0661  |
| HR (95% CI), Model 2        | Reference | 0.96(0.72-1.27) | 0.75(0.56-1.00) | 0.81(0.61-1.08) | 0.84(0.64-1.10) | 0.25    |
| Ovarian cancer <sup>§</sup> |           |                 |                 |                 |                 |         |
| Events                      | 17        | 29              | 31              | 26              | 34              |         |
| Person-years                | 50190.78  | 55278.12        | 73544.72        | 74154.14        | 111168.04       |         |
| HR (95% CI), Model 1        | Reference | 1.51(0.83-2.75) | 1.18(0.65-2.14) | 0.96(0.52-1.77) | 0.80(0.45-1.44) | 0.14    |

|                                     |           |                 |                 |                 |                 |         |
|-------------------------------------|-----------|-----------------|-----------------|-----------------|-----------------|---------|
| HR (95% CI), Model 2                | Reference | 1.54(0.84-2.80) | 1.23(0.68-2.22) | 1.01(0.55-1.87) | 0.87(0.48-1.59) | 0.23    |
| <b>Breast cancer<sup>§</sup></b>    |           |                 |                 |                 |                 |         |
| Events                              | 178       | 179             | 229             | 235             | 349             |         |
| Person-years                        | 47813     | 52776.42        | 70343.12        | 71061.95        | 105799.12       |         |
| HR (95% CI), Model 1                | Reference | 0.91(0.74-1.11) | 0.86(0.71-1.05) | 0.87(0.71-1.05) | 0.85(0.71-1.02) | 0.48    |
| HR (95% CI), Model 2                | Reference | 0.92(0.75-1.14) | 0.89(0.73-1.08) | 0.90(0.74-1.10) | 0.90(0.75-1.08) | 0.79    |
| <b>Prostate cancer<sup>¶</sup></b>  |           |                 |                 |                 |                 |         |
| Events                              | 233       | 239             | 278             | 233             | 291             |         |
| Person-years                        | 54724.58  | 51444.9         | 58005.55        | 50454.99        | 60537.67        |         |
| HR (95% CI), Model 1                | Reference | 1.11(0.96-1.27) | 1.07(0.93-1.22) | 1.13(0.99-1.30) | 1.06(0.92-1.22) | 0.46    |
| HR (95% CI), Model 2                | Reference | 1.08(0.95-1.24) | 1.04(0.91-1.19) | 1.10(0.95-1.26) | 1.01(0.87-1.16) | 0.58    |
| <b>Other cancers</b>                |           |                 |                 |                 |                 |         |
| Events                              | 643       | 593             | 656             | 581             | 769             |         |
| Person-years                        | 94223.91  | 96942.99        | 119927.29       | 113515.15       | 157569.41       |         |
| HR (95% CI), Model 1                | Reference | 0.88(0.78-0.98) | 0.77(0.69-0.86) | 0.71(0.63-0.79) | 0.66(0.60-0.74) | <0.0001 |
| HR (95% CI), Model 2                | Reference | 0.90(0.80-1.00) | 0.80(0.72-0.89) | 0.75(0.67-0.84) | 0.73(0.65-0.81) | <0.0001 |
| <b>Depression</b>                   |           |                 |                 |                 |                 |         |
| Events                              | 114       | 102             | 101             | 99              | 125             |         |
| Person-years                        | 93898.39  | 97048.67        | 119694.95       | 113987.36       | 159128.18       |         |
| HR (95% CI), Model 1                | Reference | 0.85(0.65-1.11) | 0.67(0.51-0.87) | 0.68(0.52-0.89) | 0.60(0.46-0.77) | 0.0007  |
| HR (95% CI), Model 2                | Reference | 0.90(0.68-1.17) | 0.73(0.56-0.96) | 0.77(0.58-1.01) | 0.72(0.55-0.94) | 0.0746  |
| <b>Anxiety</b>                      |           |                 |                 |                 |                 |         |
| Events                              | 347       | 293             | 369             | 302             | 416             |         |
| Person-years                        | 97668.66  | 100434.74       | 123643.17       | 117806.57       | 163398.8        |         |
| HR (95% CI), Model 1                | Reference | 0.79(0.68-0.92) | 0.78(0.67-0.90) | 0.65(0.56-0.76) | 0.61(0.53-0.71) | <0.0001 |
| HR (95% CI), Model 2                | Reference | 0.81(0.69-0.95) | 0.82(0.71-0.95) | 0.70(0.60-0.82) | 0.69(0.59-0.80) | <0.0001 |
| <b>Schizophrenia</b>                |           |                 |                 |                 |                 |         |
| Events                              | 13        | 13              | 13              | 16              | 16              |         |
| Person-years                        | 99517.35  | 102158.23       | 125825.92       | 119533.52       | 165980.91       |         |
| HR (95% CI), Model 1                | Reference | 0.97(0.45-2.08) | 0.78(0.36-1.69) | 1.00(0.48-2.10) | 0.71(0.34-1.50) | 0.83    |
| HR (95% CI), Model 2                | Reference | 1.10(0.51-2.38) | 0.95(0.44-2.07) | 1.31(0.62-2.75) | 1.07(0.50-2.28) | 0.93    |
| <b>Alcohol use disorder</b>         |           |                 |                 |                 |                 |         |
| Events                              | 127       | 91              | 90              | 78              | 66              |         |
| Person-years                        | 99281.12  | 101993.52       | 125717.99       | 119607.2        | 166115.01       |         |
| HR (95% CI), Model 1                | Reference | 0.71(0.54-0.93) | 0.58(0.44-0.76) | 0.54(0.41-0.72) | 0.34(0.25-0.46) | <0.0001 |
| HR (95% CI), Model 2                | Reference | 0.74(0.56-0.97) | 0.63(0.48-0.83) | 0.61(0.46-0.81) | 0.39(0.29-0.54) | <0.0001 |
| <b>Psychoactive substance abuse</b> |           |                 |                 |                 |                 |         |
| Events                              | 22        | 15              | 20              | 9               | 16              |         |
| Person-years                        | 99695.47  | 102270.28       | 126103.07       | 119868.65       | 166229.16       |         |
| HR (95% CI), Model 1                | Reference | 0.67(0.35-1.29) | 0.74(0.40-1.35) | 0.35(0.16-0.77) | 0.46(0.24-0.88) | 0.0502  |
| HR (95% CI), Model 2                | Reference | 0.75(0.39-1.44) | 0.87(0.47-1.60) | 0.44(0.20-0.96) | 0.61(0.31-1.20) | 0.26    |
| <b>Epilepsy</b>                     |           |                 |                 |                 |                 |         |
| Events                              | 44        | 35              | 41              | 45              | 39              |         |
| Person-years                        | 98877.75  | 101740.59       | 125249.25       | 119299.79       | 165358.93       |         |

|                       |           |                 |                 |                 |                 |         |
|-----------------------|-----------|-----------------|-----------------|-----------------|-----------------|---------|
| HR (95% CI), Model 1  | Reference | 0.76(0.49-1.19) | 0.72(0.47-1.10) | 0.83(0.54-1.26) | 0.51(0.33-0.79) | 0.05    |
| HR (95% CI), Model 2  | Reference | 0.77(0.50-1.21) | 0.74(0.48-1.13) | 0.85(0.56-1.30) | 0.54(0.35-0.84) | 0.09    |
| Migraine              |           |                 |                 |                 |                 |         |
| Events                | 65        | 69              | 77              | 68              | 115             |         |
| Person-years          | 96696.67  | 99206.06        | 121967.35       | 116101.2        | 160443.34       |         |
| HR (95% CI), Model 1  | Reference | 1.02(0.73-1.43) | 0.91(0.65-1.26) | 0.83(0.59-1.17) | 1.00(0.73-1.36) | 0.70    |
| HR (95% CI), Model 2  | Reference | 1.03(0.73-1.44) | 0.92(0.66-1.28) | 0.84(0.60-1.19) | 1.02(0.74-1.39) | 0.70    |
| Dementia              |           |                 |                 |                 |                 |         |
| Events                | 83        | 64              | 71              | 74              | 109             |         |
| Person-years          | 99778.11  | 102378.99       | 126216.86       | 119949.62       | 166323.82       |         |
| HR (95% CI), Model 1  | Reference | 0.72(0.52-1.00) | 0.64(0.46-0.87) | 0.68(0.50-0.93) | 0.71(0.53-0.95) | 0.0463  |
| HR (95% CI), Model 2  | Reference | 0.74(0.53-1.02) | 0.66(0.48-0.91) | 0.71(0.52-0.98) | 0.76(0.56-1.02) | 0.10    |
| Parkinson's disease   |           |                 |                 |                 |                 |         |
| Events                | 49        | 38              | 55              | 52              | 40              |         |
| Person-years          | 99718.17  | 102336.31       | 126061.26       | 119799.22       | 166181.31       |         |
| HR (95% CI), Model 1  | Reference | 0.74(0.49-1.13) | 0.87(0.59-1.28) | 0.86(0.58-1.28) | 0.48(0.32-0.74) | 0.0106  |
| HR (95% CI), Model 2  | Reference | 0.73(0.48-1.12) | 0.86(0.58-1.27) | 0.85(0.57-1.27) | 0.47(0.31-0.73) | 0.0092  |
| Multiple sclerosis    |           |                 |                 |                 |                 |         |
| Events                | 11        | 11              | 14              | 12              | 13              |         |
| Person-years          | 99424.48  | 102122.46       | 125687.96       | 119555.53       | 165640.47       |         |
| HR (95% CI), Model 1  | Reference | 0.97(0.42-2.24) | 1.00(0.45-2.21) | 0.90(0.39-2.04) | 0.70(0.31-1.58) | 0.89    |
| HR (95% CI), Model 2  | Reference | 1.00(0.43-2.31) | 1.04(0.47-2.30) | 0.94(0.41-2.16) | 0.75(0.33-1.72) | 0.93    |
| Bronchiectasis        |           |                 |                 |                 |                 |         |
| Events                | 77        | 74              | 67              | 61              | 101             |         |
| Person-years          | 99535.01  | 102131.94       | 125801.76       | 119678.26       | 165829.73       |         |
| HR (95% CI), Model 1  | Reference | 0.90(0.66-1.24) | 0.64(0.46-0.89) | 0.59(0.42-0.83) | 0.68(0.50-0.92) | 0.0053  |
| HR (95% CI), Model 2  | Reference | 0.92(0.67-1.27) | 0.66(0.47-0.92) | 0.61(0.43-0.86) | 0.70(0.51-0.95) | 0.0121  |
| Asthma                |           |                 |                 |                 |                 |         |
| Events                | 193       | 174             | 208             | 198             | 240             |         |
| Person-years          | 87364.53  | 90170.57        | 111022.95       | 105587.51       | 148335.85       |         |
| HR (95% CI), Model 1  | Reference | 0.85(0.69-1.04) | 0.81(0.66-0.98) | 0.79(0.65-0.97) | 0.66(0.55-0.81) | 0.0013  |
| HR (95% CI), Model 2  | Reference | 0.88(0.72-1.08) | 0.86(0.71-1.05) | 0.87(0.71-1.07) | 0.77(0.63-0.94) | 0.16    |
| COPD                  |           |                 |                 |                 |                 |         |
| Events                | 278       | 198             | 222             | 164             | 211             |         |
| Person-years          | 98341.24  | 101178.77       | 124948.83       | 118833.19       | 164926.39       |         |
| HR (95% CI), Model 1  | Reference | 0.67(0.56-0.81) | 0.60(0.50-0.71) | 0.46(0.38-0.55) | 0.42(0.35-0.50) | <0.0001 |
| HR (95% CI), Model 2  | Reference | 0.76(0.63-0.91) | 0.71(0.59-0.85) | 0.57(0.47-0.69) | 0.58(0.48-0.69) | <0.0001 |
| CKD                   |           |                 |                 |                 |                 |         |
| Events                | 582       | 472             | 513             | 420             | 504             |         |
| Person-years          | 99172.59  | 101834.18       | 125695.77       | 119503.82       | 165623.47       |         |
| HR (95% CI), Model 1  | Reference | 0.76(0.67-0.86) | 0.66(0.59-0.74) | 0.56(0.49-0.64) | 0.48(0.43-0.54) | <0.0001 |
| HR (95% CI), Model 2  | Reference | 0.80(0.71-0.91) | 0.73(0.65-0.82) | 0.64(0.56-0.73) | 0.59(0.52-0.67) | <0.0001 |
| Chronic liver disease |           |                 |                 |                 |                 |         |
| Events                | 29        | 23              | 28              | 24              | 19              |         |
| Person-years          | 99131.74  | 101991.46       | 125753.24       | 119229          | 165599.47       |         |



|                            |           |                 |                 |                 |                 |         |
|----------------------------|-----------|-----------------|-----------------|-----------------|-----------------|---------|
| HR (95% CI), Model 1       | Reference | 0.77(0.45-1.33) | 0.76(0.45-1.29) | 0.70(0.40-1.20) | 0.40(0.22-0.72) | 0.0460  |
| HR (95% CI), Model 2       | Reference | 0.78(0.48-1.27) | 0.65(0.40-1.06) | 0.77(0.47-1.24) | 0.38(0.22-0.67) | 0.0176  |
| Irritable bowel syndrome   |           |                 |                 |                 |                 |         |
| Events                     | 139       | 107             | 126             | 126             | 160             |         |
| Person-years               | 97002.76  | 99727.63        | 123112.56       | 116826.31       | 162419.99       |         |
| HR (95% CI), Model 1       | Reference | 0.72(0.56-0.92) | 0.66(0.51-0.83) | 0.67(0.52-0.85) | 0.58(0.46-0.73) | <0.0001 |
| HR (95% CI), Model 2       | Reference | 0.74(0.58-0.96) | 0.71(0.56-0.91) | 0.75(0.58-0.95) | 0.68(0.54-0.86) | 0.0151  |
| Inflammatory bowel disease |           |                 |                 |                 |                 |         |
| Events                     | 48        | 43              | 60              | 50              | 67              |         |
| Person-years               | 98385.44  | 101396.36       | 125081.2        | 118827.3        | 165047.56       |         |
| HR (95% CI), Model 1       | Reference | 0.86(0.57-1.30) | 0.98(0.67-1.43) | 0.85(0.57-1.27) | 0.82(0.56-1.19) | 0.79    |
| HR (95% CI), Model 2       | Reference | 0.90(0.60-1.36) | 1.04(0.71-1.52) | 0.93(0.62-1.40) | 0.93(0.64-1.37) | 0.95    |
| Treated constipation       |           |                 |                 |                 |                 |         |
| Events                     | 404       | 349             | 431             | 347             | 510             |         |
| Person-years               | 98609.87  | 101220.14       | 124878.66       | 118896.88       | 164715.8        |         |
| HR (95% CI), Model 1       | Reference | 0.82(0.71-0.95) | 0.80(0.70-0.92) | 0.67(0.58-0.77) | 0.69(0.61-0.79) | <0.0001 |
| HR (95% CI), Model 2       | Reference | 0.83(0.72-0.96) | 0.82(0.71-0.94) | 0.69(0.59-0.79) | 0.72(0.63-0.83) | <0.0001 |
| Dyspepsia                  |           |                 |                 |                 |                 |         |
| Events                     | 1081      | 1032            | 1219            | 1121            | 1478            |         |
| Person-years               | 87029.08  | 91126.99        | 112654.21       | 108041.5        | 151994.09       |         |
| HR (95% CI), Model 1       | Reference | 0.89(0.82-0.97) | 0.83(0.77-0.91) | 0.79(0.72-0.86) | 0.72(0.67-0.78) | <0.0001 |
| HR (95% CI), Model 2       | Reference | 0.92(0.84-1.00) | 0.87(0.80-0.95) | 0.84(0.77-0.92) | 0.80(0.74-0.87) | <0.0001 |
| Diverticular disease       |           |                 |                 |                 |                 |         |
| Events                     | 947       | 879             | 1074            | 868             | 1172            |         |
| Person-years               | 95503.29  | 98771.67        | 121566.34       | 116249.27       | 161603.57       |         |
| HR (95% CI), Model 1       | Reference | 0.88(0.80-0.96) | 0.86(0.79-0.94) | 0.71(0.65-0.78) | 0.68(0.62-0.74) | <0.0001 |
| HR (95% CI), Model 2       | Reference | 0.91(0.83-1.00) | 0.91(0.83-0.99) | 0.78(0.71-0.85) | 0.78(0.71-0.85) | <0.0001 |
| Pernicious anaemia         |           |                 |                 |                 |                 |         |
| Events                     | 29        | 18              | 11              | 15              | 18              |         |
| Person-years               | 99479.26  | 102101.3        | 125942.5        | 119658.51       | 165938.52       |         |
| HR (95% CI), Model 1       | Reference | 0.60(0.33-1.07) | 0.29(0.14-0.58) | 0.41(0.22-0.77) | 0.35(0.19-0.64) | 0.0007  |
| HR (95% CI), Model 2       | Reference | 0.51(0.24-1.09) | 0.47(0.22-0.97) | 0.36(0.16-0.82) | 0.38(0.18-0.79) | 0.0365  |
| Fracture                   |           |                 |                 |                 |                 |         |
| Events                     | 67        | 70              | 86              | 87              | 144             |         |
| Person-years               | 99248.67  | 101785.71       | 125656.9        | 119401.31       | 165523.36       |         |
| HR (95% CI), Model 1       | Reference | 0.98(0.70-1.37) | 0.94(0.68-1.29) | 0.97(0.70-1.33) | 1.11(0.83-1.49) | 0.75    |
| HR (95% CI), Model 2       | Reference | 0.98(0.70-1.38) | 0.93(0.67-1.28) | 0.95(0.69-1.31) | 1.05(0.78-1.42) | 0.90    |
| Osteoporosis               |           |                 |                 |                 |                 |         |
| Events                     | 648       | 649             | 772             | 697             | 923             |         |
| Person-years               | 90754.38  | 94129.7         | 115872.55       | 110061.94       | 152974.71       |         |
| HR (95% CI), Model 1       | Reference | 0.93(0.83-1.04) | 0.86(0.78-0.96) | 0.80(0.72-0.89) | 0.74(0.66-0.81) | <0.0001 |
| HR (95% CI), Model 2       | Reference | 0.96(0.86-1.07) | 0.93(0.84-1.03) | 0.89(0.80-0.99) | 0.87(0.79-0.97) | 0.0870  |
| Meniere's disease          |           |                 |                 |                 |                 |         |
| Events                     | 9         | 10              | 11              | 12              | 16              |         |

|                                 |           |                 |                 |                 |                 |         |
|---------------------------------|-----------|-----------------|-----------------|-----------------|-----------------|---------|
| Person-years                    | 99562.36  | 102176.18       | 125693.17       | 119688.29       | 165742.56       |         |
| HR (95% CI), Model 1            | Reference | 1.07(0.43-2.63) | 0.95(0.39-2.29) | 1.08(0.45-2.57) | 1.03(0.45-2.35) | 1.00    |
| HR (95% CI), Model 2            | Reference | 1.08(0.44-2.67) | 0.98(0.41-2.38) | 1.16(0.48-2.77) | 1.17(0.50-2.70) | 0.99    |
| Eczema                          |           |                 |                 |                 |                 |         |
| Events                          | 144       | 119             | 154             | 123             | 165             |         |
| Person-years                    | 95431.22  | 98018.44        | 121412.05       | 115022.22       | 159742.91       |         |
| HR (95% CI), Model 1            | Reference | 0.80(0.62-1.02) | 0.83(0.66-1.04) | 0.70(0.55-0.89) | 0.67(0.53-0.84) | 0.0060  |
| HR (95% CI), Model 2            | Reference | 0.81(0.63-1.03) | 0.85(0.67-1.07) | 0.72(0.56-0.92) | 0.70(0.55-0.88) | 0.0247  |
| Glaucoma                        |           |                 |                 |                 |                 |         |
| Events                          | 162       | 161             | 190             | 172             | 263             |         |
| Person-years                    | 98572.12  | 101025.9        | 124735.81       | 118475.58       | 164382.96       |         |
| HR (95% CI), Model 1            | Reference | 0.95(0.77-1.18) | 0.89(0.72-1.10) | 0.85(0.68-1.05) | 0.93(0.76-1.13) | 0.62    |
| HR (95% CI), Model 2            | Reference | 0.94(0.76-1.17) | 0.88(0.71-1.09) | 0.83(0.67-1.03) | 0.89(0.72-1.09) | 0.51    |
| Cataract                        |           |                 |                 |                 |                 |         |
| Events                          | 792       | 730             | 886             | 924             | 1242            |         |
| Person-years                    | 96588.76  | 99368.36        | 122414.29       | 116253.16       | 160969.39       |         |
| HR (95% CI), Model 1            | Reference | 0.86(0.78-0.95) | 0.81(0.73-0.89) | 0.87(0.79-0.96) | 0.81(0.74-0.89) | <0.0001 |
| HR (95% CI), Model 2            | Reference | 0.87(0.79-0.96) | 0.83(0.75-0.91) | 0.89(0.81-0.98) | 0.85(0.77-0.93) | 0.0012  |
| AMD                             |           |                 |                 |                 |                 |         |
| Events                          | 127       | 137             | 142             | 144             | 217             |         |
| Person-years                    | 99603.82  | 102149.88       | 125953.08       | 119630.99       | 165847.47       |         |
| HR (95% CI), Model 1            | Reference | 1.01(0.79-1.29) | 0.81(0.64-1.03) | 0.83(0.66-1.06) | 0.87(0.69-1.08) | 0.21    |
| HR (95% CI), Model 2            | Reference | 1.02(0.80-1.30) | 0.83(0.65-1.05) | 0.85(0.67-1.08) | 0.89(0.71-1.11) | 0.31    |
| Thyroid disorders               |           |                 |                 |                 |                 |         |
| Events                          | 234       | 201             | 261             | 253             | 350             |         |
| Person-years                    | 93657.97  | 96650.01        | 118734.56       | 113031.07       | 156270.13       |         |
| HR (95% CI), Model 1            | Reference | 0.80(0.66-0.96) | 0.81(0.68-0.96) | 0.80(0.67-0.95) | 0.76(0.64-0.90) | 0.0220  |
| HR (95% CI), Model 2            | Reference | 0.81(0.67-0.98) | 0.84(0.71-1.01) | 0.85(0.71-1.02) | 0.85(0.72-1.01) | 0.22    |
| Prostate disorders <sup>‡</sup> |           |                 |                 |                 |                 |         |
| Events                          | 443       | 385             | 424             | 357             | 437             |         |
| Person-years                    | 51594.84  | 48389.38        | 54474.95        | 47551.91        | 57027.33        |         |
| HR (95% CI), Model 1            | Reference | 0.90(0.81-1.00) | 0.87(0.78-0.96) | 0.89(0.80-0.99) | 0.85(0.77-0.95) | 0.0253  |
| HR (95% CI), Model 2            | Reference | 0.90(0.81-1.00) | 0.87(0.79-0.97) | 0.89(0.80-1.00) | 0.86(0.77-0.96) | 0.0463  |

AMD, age related macular degeneration; CI, confidence interval; CKD, chronic kidney disease; COPD, chronic obstructive pulmonary disease; HR, hazard ratio.

\*Cox proportional hazard regression models were used to examine associations of the Alternate Mediterranean Diet Index (quintiles) with the incidence of individual chronic diseases. The statistical tests were two-sided. Model 1 was adjusted for age and sex; Model 2 was adjusted for Model 1 plus ethnicity, education, income, smoking, alcohol consumption, sleep, physical activity, and GRS for longevity; Model 3 was adjusted for Model 2 and total energy intake.

†Cardiovascular disease includes coronary heart disease, heart failure, atrial fibrillation, other cardiac disease, stroke, and peripheral vascular disease.

‡All cancers encompass any type of cancer except for non-melanoma skin cancer.

<sup>§</sup>These analyses were conducted among women only.

<sup>¶</sup>These analyses were conducted among men only.

**Table S10. The association between the Anti-Empirical Dietary Inflammatory Index and the incidence of individual chronic diseases among individuals with three or more dietary assessments**

|                                           | Anti-Empirical Dietary Inflammatory Index |                 |                 |                 |                 | P-value<br>for trend* |
|-------------------------------------------|-------------------------------------------|-----------------|-----------------|-----------------|-----------------|-----------------------|
|                                           | Quintile 1                                | Quintile 2      | Quintile 3      | Quintile 4      | Quintile 5      |                       |
| <b>Cardiovascular disease<sup>†</sup></b> |                                           |                 |                 |                 |                 |                       |
| Events                                    | 1102                                      | 1061            | 1069            | 1012            | 1110            |                       |
| Person-years                              | 115128.51                                 | 116527.68       | 116788.33       | 116721.3        | 117150.09       |                       |
| HR (95% CI), Model 1                      | Reference                                 | 0.89(0.81-0.96) | 0.85(0.78-0.92) | 0.77(0.71-0.84) | 0.81(0.74-0.88) | <0.0001               |
| HR (95% CI), Model 2                      | Reference                                 | 0.94(0.86-1.02) | 0.91(0.83-0.99) | 0.85(0.78-0.92) | 0.89(0.82-0.97) | 0.0037                |
| <b>Coronary heart disease</b>             |                                           |                 |                 |                 |                 |                       |
| Events                                    | 629                                       | 566             | 557             | 521             | 577             |                       |
| Person-years                              | 119471.59                                 | 120657.02       | 120956.85       | 120917.94       | 121375.43       |                       |
| HR (95% CI), Model 1                      | Reference                                 | 0.83(0.74-0.93) | 0.77(0.69-0.87) | 0.70(0.62-0.78) | 0.74(0.66-0.83) | <0.0001               |
| HR (95% CI), Model 2                      | Reference                                 | 0.89(0.80-1.00) | 0.85(0.76-0.95) | 0.78(0.70-0.88) | 0.84(0.75-0.95) | 0.0012                |
| <b>Heart failure</b>                      |                                           |                 |                 |                 |                 |                       |
| Events                                    | 193                                       | 178             | 181             | 167             | 165             |                       |
| Person-years                              | 122856.76                                 | 123881.26       | 123895.27       | 123722.49       | 124573.91       |                       |
| HR (95% CI), Model 1                      | Reference                                 | 0.84(0.68-1.03) | 0.80(0.65-0.98) | 0.71(0.57-0.87) | 0.66(0.54-0.81) | 0.0010                |
| HR (95% CI), Model 2                      | Reference                                 | 0.93(0.76-1.14) | 0.91(0.74-1.12) | 0.84(0.68-1.03) | 0.80(0.65-0.99) | 0.27                  |
| <b>Atrial fibrillation</b>                |                                           |                 |                 |                 |                 |                       |
| Events                                    | 218                                       | 205             | 209             | 237             | 226             |                       |
| Person-years                              | 121289.45                                 | 122433.8        | 122289.12       | 122005.14       | 122944.27       |                       |
| HR (95% CI), Model 1                      | Reference                                 | 0.86(0.71-1.04) | 0.82(0.68-0.99) | 0.89(0.74-1.07) | 0.80(0.66-0.97) | 0.16                  |
| HR (95% CI), Model 2                      | Reference                                 | 0.92(0.76-1.12) | 0.90(0.74-1.09) | 1.00(0.83-1.21) | 0.91(0.75-1.10) | 0.65                  |
| <b>Other cardiac disease</b>              |                                           |                 |                 |                 |                 |                       |
| Events                                    | 432                                       | 428             | 462             | 430             | 423             |                       |
| Person-years                              | 121318.9                                  | 122518.31       | 122546.05       | 122504.63       | 123270.19       |                       |
| HR (95% CI), Model 1                      | Reference                                 | 0.90(0.79-1.03) | 0.93(0.81-1.06) | 0.83(0.72-0.94) | 0.78(0.68-0.89) | 0.0021                |
| HR (95% CI), Model 2                      | Reference                                 | 0.96(0.84-1.10) | 0.99(0.87-1.14) | 0.92(0.80-1.05) | 0.87(0.76-0.99) | 0.20                  |
| <b>Stroke</b>                             |                                           |                 |                 |                 |                 |                       |
| Events                                    | 83                                        | 94              | 84              | 74              | 107             |                       |
| Person-years                              | 122855.39                                 | 123758.14       | 123817.59       | 123829.76       | 124315.78       |                       |
| HR (95% CI), Model 1                      | Reference                                 | 1.04(0.77-1.39) | 0.88(0.65-1.19) | 0.74(0.54-1.02) | 1.03(0.77-1.37) | 0.16                  |
| HR (95% CI), Model 2                      | Reference                                 | 1.07(0.80-1.44) | 0.91(0.67-1.23) | 0.78(0.56-1.07) | 1.07(0.80-1.44) | 0.19                  |
| <b>Peripheral vascular disease</b>        |                                           |                 |                 |                 |                 |                       |
| Events                                    | 116                                       | 89              | 107             | 106             | 105             |                       |
| Person-years                              | 122899.8                                  | 124056.8        | 123946.83       | 123922.22       | 124597.79       |                       |
| HR (95% CI), Model 1                      | Reference                                 | 0.72(0.54-0.94) | 0.83(0.64-1.09) | 0.80(0.62-1.04) | 0.77(0.59-1.00) | 0.16                  |
| HR (95% CI), Model 2                      | Reference                                 | 0.73(0.55-0.96) | 0.85(0.65-1.10) | 0.82(0.63-1.07) | 0.77(0.59-1.02) | 0.21                  |
| <b>Hypertension</b>                       |                                           |                 |                 |                 |                 |                       |
| Events                                    | 490                                       | 475             | 449             | 446             | 473             |                       |
| Person-years                              | 88618.5                                   | 92026.95        | 92921.67        | 94041.56        | 94681.98        |                       |
| HR (95% CI), Model 1                      | Reference                                 | 0.85(0.75-0.97) | 0.76(0.67-0.86) | 0.71(0.63-0.81) | 0.73(0.64-0.82) | <0.0001               |
| HR (95% CI), Model 2                      | Reference                                 | 0.94(0.83-1.06) | 0.85(0.75-0.97) | 0.82(0.72-0.93) | 0.86(0.75-0.98) | 0.0193                |

|                             |           |                 |                 |                 |                 |         |
|-----------------------------|-----------|-----------------|-----------------|-----------------|-----------------|---------|
| Diabetes                    |           |                 |                 |                 |                 |         |
| Events                      | 444       | 303             | 261             | 248             | 218             |         |
| Person-years                | 116163.47 | 118817.26       | 119779.16       | 120232.02       | 121585.98       |         |
| HR (95% CI), Model 1        | Reference | 0.64(0.55-0.74) | 0.53(0.45-0.62) | 0.49(0.42-0.57) | 0.41(0.35-0.49) | <0.0001 |
| HR (95% CI), Model 2        | Reference | 0.79(0.68-0.91) | 0.67(0.58-0.79) | 0.67(0.57-0.79) | 0.60(0.50-0.71) | <0.0001 |
| All cancers <sup>‡</sup>    |           |                 |                 |                 |                 |         |
| Events                      | 697       | 727             | 798             | 787             | 782             |         |
| Person-years                | 112661.08 | 113330.21       | 112959.08       | 112961.82       | 113567.11       |         |
| HR (95% CI), Model 1        | Reference | 0.97(0.87-1.07) | 1.03(0.93-1.14) | 0.98(0.88-1.08) | 0.94(0.85-1.04) | 0.48    |
| HR (95% CI), Model 2        | Reference | 1.00(0.90-1.11) | 1.06(0.96-1.18) | 1.02(0.92-1.13) | 0.98(0.88-1.09) | 0.51    |
| Non-melanoma skin cancer    |           |                 |                 |                 |                 |         |
| Events                      | 393       | 407             | 437             | 495             | 487             |         |
| Person-years                | 120545.92 | 121161.93       | 121338.36       | 120699.1        | 121417.59       |         |
| HR (95% CI), Model 1        | Reference | 0.96(0.83-1.10) | 0.98(0.85-1.12) | 1.07(0.94-1.22) | 1.01(0.88-1.15) | 0.49    |
| HR (95% CI), Model 2        | Reference | 0.94(0.82-1.08) | 0.96(0.84-1.10) | 1.04(0.91-1.19) | 0.99(0.87-1.14) | 0.58    |
| Melanoma                    |           |                 |                 |                 |                 |         |
| Events                      | 43        | 66              | 67              | 59              | 60              |         |
| Person-years                | 122504.73 | 123170.91       | 123125.62       | 123082.01       | 123704.47       |         |
| HR (95% CI), Model 1        | Reference | 1.44(0.98-2.12) | 1.42(0.97-2.09) | 1.22(0.82-1.81) | 1.21(0.82-1.79) | 0.33    |
| HR (95% CI), Model 2        | Reference | 1.42(0.97-2.09) | 1.40(0.95-2.05) | 1.19(0.80-1.77) | 1.19(0.80-1.78) | 0.37    |
| Lung cancer                 |           |                 |                 |                 |                 |         |
| Events                      | 70        | 55              | 80              | 78              | 92              |         |
| Person-years                | 123346.23 | 124322.32       | 124276.18       | 124194.06       | 124819.32       |         |
| HR (95% CI), Model 1        | Reference | 0.71(0.50-1.01) | 0.99(0.72-1.37) | 0.93(0.67-1.28) | 1.06(0.77-1.44) | 0.20    |
| HR (95% CI), Model 2        | Reference | 0.78(0.56-1.08) | 1.06(0.78-1.44) | 1.02(0.75-1.39) | 1.02(0.76-1.38) | 0.37    |
| Stomach cancer              |           |                 |                 |                 |                 |         |
| Events                      | 16        | 24              | 18              | 25              | 15              |         |
| Person-years                | 123592.44 | 124500.87       | 124495.62       | 124345.23       | 125198.66       |         |
| HR (95% CI), Model 1        | Reference | 1.41(0.75-2.65) | 1.00(0.51-1.97) | 1.35(0.72-2.54) | 0.77(0.38-1.56) | 0.32    |
| HR (95% CI), Model 2        | Reference | 1.47(0.78-2.77) | 1.07(0.54-2.11) | 1.43(0.76-2.71) | 0.81(0.40-1.67) | 0.31    |
| Oesophageal cancer          |           |                 |                 |                 |                 |         |
| Events                      | 20        | 28              | 27              | 18              | 27              |         |
| Person-years                | 123550.66 | 124507.72       | 124466.31       | 124479.06       | 125129.56       |         |
| HR (95% CI), Model 1        | Reference | 1.27(0.72-2.26) | 1.15(0.65-2.06) | 0.74(0.39-1.39) | 1.04(0.58-1.87) | 0.47    |
| HR (95% CI), Model 2        | Reference | 1.42(0.80-2.53) | 1.32(0.74-2.36) | 0.88(0.46-1.69) | 1.27(0.70-2.29) | 0.49    |
| Colon cancer                |           |                 |                 |                 |                 |         |
| Events                      | 96        | 93              | 93              | 99              | 122             |         |
| Person-years                | 122680.71 | 123835.37       | 123641.28       | 123626.38       | 124252          |         |
| HR (95% CI), Model 1        | Reference | 0.89(0.67-1.18) | 0.85(0.64-1.13) | 0.87(0.65-1.15) | 1.03(0.78-1.34) | 0.55    |
| HR (95% CI), Model 2        | Reference | 0.93(0.70-1.24) | 0.90(0.67-1.20) | 0.94(0.70-1.25) | 1.10(0.84-1.45) | 0.60    |
| Ovarian cancer <sup>§</sup> |           |                 |                 |                 |                 |         |
| Events                      | 33        | 36              | 20              | 22              | 26              |         |
| Person-years                | 72745.17  | 74726.61        | 73872.14        | 73732.71        | 72424.54        |         |
| HR (95% CI), Model 1        | Reference | 1.04(0.65-1.67) | 0.57(0.33-1.00) | 0.62(0.36-1.06) | 0.73(0.43-1.21) | 0.0898  |

|                              |           |                 |                 |                 |                 |         |
|------------------------------|-----------|-----------------|-----------------|-----------------|-----------------|---------|
| HR (95% CI), Model 2         | Reference | 1.09(0.68-1.76) | 0.62(0.35-1.08) | 0.68(0.40-1.18) | 0.83(0.49-1.42) | 0.20    |
| Breast cancer <sup>§</sup>   |           |                 |                 |                 |                 |         |
| Events                       | 228       | 247             | 233             | 244             | 218             |         |
| Person-years                 | 68991.75  | 70254.35        | 69304.38        | 69288.89        | 67884.71        |         |
| HR (95% CI), Model 1         | Reference | 1.05(0.88-1.26) | 1.00(0.83-1.20) | 1.04(0.87-1.24) | 0.94(0.78-1.13) | 0.78    |
| HR (95% CI), Model 2         | Reference | 1.07(0.89-1.28) | 1.01(0.84-1.21) | 1.05(0.87-1.26) | 0.95(0.78-1.15) | 0.75    |
| Prostate cancer <sup>¶</sup> |           |                 |                 |                 |                 |         |
| Events                       | 212       | 242             | 292             | 252             | 277             |         |
| Person-years                 | 56302.25  | 53852.5         | 54671.58        | 54735.1         | 55884.5         |         |
| HR (95% CI), Model 1         | Reference | 1.10(0.95-1.27) | 1.21(1.05-1.39) | 1.08(0.94-1.25) | 1.11(0.96-1.28) | 0.12    |
| HR (95% CI), Model 2         | Reference | 1.07(0.93-1.24) | 1.17(1.02-1.35) | 1.04(0.90-1.20) | 1.07(0.93-1.23) | 0.24    |
| Other cancers                |           |                 |                 |                 |                 |         |
| Events                       | 598       | 625             | 692             | 659             | 668             |         |
| Person-years                 | 114496.86 | 115335.04       | 115147.03       | 115102.83       | 115684.21       |         |
| HR (95% CI), Model 1         | Reference | 0.97(0.87-1.09) | 1.04(0.93-1.16) | 0.96(0.86-1.07) | 0.94(0.84-1.05) | 0.37    |
| HR (95% CI), Model 2         | Reference | 1.01(0.90-1.13) | 1.08(0.97-1.21) | 1.01(0.90-1.13) | 0.99(0.88-1.10) | 0.46    |
| Depression                   |           |                 |                 |                 |                 |         |
| Events                       | 137       | 116             | 94              | 104             | 90              |         |
| Person-years                 | 115763.98 | 117221.03       | 118064.99       | 118098.64       | 119056.35       |         |
| HR (95% CI), Model 1         | Reference | 0.83(0.65-1.06) | 0.67(0.51-0.87) | 0.74(0.57-0.95) | 0.64(0.49-0.83) | 0.0051  |
| HR (95% CI), Model 2         | Reference | 0.90(0.70-1.15) | 0.73(0.56-0.96) | 0.83(0.64-1.08) | 0.73(0.55-0.96) | 0.0963  |
| Anxiety                      |           |                 |                 |                 |                 |         |
| Events                       | 423       | 332             | 327             | 338             | 307             |         |
| Person-years                 | 119268.61 | 121157.36       | 121051.78       | 121293.79       | 122149.22       |         |
| HR (95% CI), Model 1         | Reference | 0.76(0.65-0.87) | 0.74(0.64-0.86) | 0.75(0.65-0.87) | 0.68(0.59-0.79) | <0.0001 |
| HR (95% CI), Model 2         | Reference | 0.79(0.69-0.92) | 0.78(0.68-0.91) | 0.81(0.70-0.93) | 0.73(0.63-0.85) | 0.0004  |
| Schizophrenia                |           |                 |                 |                 |                 |         |
| Events                       | 12        | 22              | 12              | 8               | 17              |         |
| Person-years                 | 123219.6  | 124154.22       | 124236.13       | 124227.23       | 124860.14       |         |
| HR (95% CI), Model 1         | Reference | 1.83(0.91-3.70) | 1.00(0.45-2.22) | 0.66(0.27-1.62) | 1.39(0.66-2.93) | 0.0965  |
| HR (95% CI), Model 2         | Reference | 2.10(1.03-4.26) | 1.18(0.53-2.65) | 0.81(0.33-2.01) | 1.77(0.82-3.78) | 0.0747  |
| Alcohol use disorder         |           |                 |                 |                 |                 |         |
| Events                       | 54        | 79              | 86              | 98              | 135             |         |
| Person-years                 | 122945.01 | 123876.21       | 123931.87       | 123854.43       | 124334.31       |         |
| HR (95% CI), Model 1         | Reference | 1.45(1.03-2.05) | 1.55(1.10-2.17) | 1.74(1.25-2.43) | 2.34(1.70-3.21) | <0.0001 |
| HR (95% CI), Model 2         | Reference | 1.50(1.06-2.12) | 1.59(1.13-2.25) | 1.79(1.28-2.51) | 2.36(1.71-3.26) | 0.0001  |
| Psychoactive substance abuse |           |                 |                 |                 |                 |         |
| Events                       | 7         | 17              | 21              | 20              | 17              |         |
| Person-years                 | 123528.84 | 124403.45       | 124410.59       | 124355.04       | 125121.68       |         |
| HR (95% CI), Model 1         | Reference | 2.47(1.02-5.97) | 3.03(1.29-7.15) | 2.88(1.22-6.84) | 2.41(1.00-5.84) | 0.13    |
| HR (95% CI), Model 2         | Reference | 2.72(1.12-6.58) | 3.34(1.41-7.90) | 3.24(1.36-7.72) | 2.61(1.07-6.40) | 0.0787  |
| Epilepsy                     |           |                 |                 |                 |                 |         |
| Events                       | 51        | 37              | 42              | 35              | 39              |         |
| Person-years                 | 122311.65 | 123627.82       | 123645.82       | 123638.29       | 124408.41       |         |

|                       |           |                 |                 |                 |                 |         |
|-----------------------|-----------|-----------------|-----------------|-----------------|-----------------|---------|
| HR (95% CI), Model 1  | Reference | 0.69(0.45-1.05) | 0.76(0.51-1.15) | 0.62(0.40-0.95) | 0.67(0.44-1.02) | 0.19    |
| HR (95% CI), Model 2  | Reference | 0.69(0.45-1.06) | 0.77(0.51-1.16) | 0.62(0.40-0.95) | 0.66(0.43-1.02) | 0.19    |
| Migraine              |           |                 |                 |                 |                 |         |
| Events                | 87        | 63              | 81              | 98              | 65              |         |
| Person-years          | 117939.2  | 119735.57       | 120522.78       | 120692.53       | 121813.71       |         |
| HR (95% CI), Model 1  | Reference | 0.70(0.51-0.97) | 0.90(0.66-1.22) | 1.09(0.81-1.45) | 0.72(0.52-1.00) | 0.0205  |
| HR (95% CI), Model 2  | Reference | 0.71(0.51-0.98) | 0.90(0.66-1.22) | 1.09(0.81-1.47) | 0.72(0.51-1.00) | 0.0205  |
| Dementia              |           |                 |                 |                 |                 |         |
| Events                | 69        | 85              | 76              | 80              | 91              |         |
| Person-years          | 123511.02 | 124408.68       | 124409.34       | 124358.35       | 125029.24       |         |
| HR (95% CI), Model 1  | Reference | 1.08(0.79-1.49) | 0.91(0.65-1.25) | 0.89(0.64-1.23) | 0.96(0.70-1.32) | 0.73    |
| HR (95% CI), Model 2  | Reference | 1.11(0.81-1.52) | 0.93(0.67-1.29) | 0.93(0.67-1.28) | 1.00(0.73-1.38) | 0.78    |
| Parkinson's disease   |           |                 |                 |                 |                 |         |
| Events                | 41        | 51              | 41              | 44              | 57              |         |
| Person-years          | 123325.52 | 124321.57       | 124346.02       | 124355.8        | 124949.48       |         |
| HR (95% CI), Model 1  | Reference | 1.10(0.73-1.66) | 0.83(0.54-1.28) | 0.85(0.55-1.30) | 1.04(0.70-1.56) | 0.57    |
| HR (95% CI), Model 2  | Reference | 1.11(0.74-1.68) | 0.84(0.54-1.30) | 0.85(0.56-1.32) | 1.07(0.71-1.62) | 0.54    |
| Multiple sclerosis    |           |                 |                 |                 |                 |         |
| Events                | 18        | 11              | 9               | 15              | 8               |         |
| Person-years          | 123117.6  | 123968.8        | 124233.09       | 123976.03       | 124775.55       |         |
| HR (95% CI), Model 1  | Reference | 0.61(0.29-1.29) | 0.50(0.23-1.12) | 0.85(0.43-1.69) | 0.46(0.20-1.06) | 0.24    |
| HR (95% CI), Model 2  | Reference | 0.60(0.28-1.27) | 0.48(0.21-1.08) | 0.80(0.40-1.61) | 0.42(0.18-0.98) | 0.20    |
| Bronchiectasis        |           |                 |                 |                 |                 |         |
| Events                | 67        | 73              | 67              | 98              | 75              |         |
| Person-years          | 123003.58 | 124029.34       | 124045.52       | 123853.14       | 124668.52       |         |
| HR (95% CI), Model 1  | Reference | 0.98(0.70-1.37) | 0.86(0.61-1.21) | 1.20(0.88-1.64) | 0.88(0.64-1.23) | 0.20    |
| HR (95% CI), Model 2  | Reference | 0.98(0.71-1.37) | 0.86(0.61-1.21) | 1.20(0.87-1.64) | 0.88(0.63-1.23) | 0.20    |
| Asthma                |           |                 |                 |                 |                 |         |
| Events                | 214       | 199             | 199             | 208             | 193             |         |
| Person-years          | 105642.45 | 107566.69       | 107463.9        | 108519.59       | 109323.57       |         |
| HR (95% CI), Model 1  | Reference | 0.90(0.74-1.09) | 0.88(0.73-1.07) | 0.90(0.74-1.09) | 0.82(0.68-1.00) | 0.40    |
| HR (95% CI), Model 2  | Reference | 0.98(0.81-1.19) | 0.99(0.81-1.20) | 1.03(0.85-1.26) | 0.96(0.78-1.17) | 0.96    |
| COPD                  |           |                 |                 |                 |                 |         |
| Events                | 230       | 216             | 217             | 198             | 212             |         |
| Person-years          | 121265.42 | 122628.54       | 122477.75       | 122757.38       | 122906.28       |         |
| HR (95% CI), Model 1  | Reference | 0.85(0.71-1.03) | 0.82(0.68-0.98) | 0.71(0.59-0.86) | 0.73(0.61-0.89) | 0.0032  |
| HR (95% CI), Model 2  | Reference | 0.89(0.74-1.08) | 0.85(0.70-1.02) | 0.74(0.61-0.90) | 0.72(0.59-0.87) | 0.0045  |
| CKD                   |           |                 |                 |                 |                 |         |
| Events                | 624       | 503             | 482             | 462             | 420             |         |
| Person-years          | 120730.04 | 122256.57       | 122571.78       | 122567.17       | 123458.8        |         |
| HR (95% CI), Model 1  | Reference | 0.72(0.64-0.82) | 0.65(0.58-0.74) | 0.60(0.53-0.68) | 0.52(0.46-0.59) | <0.0001 |
| HR (95% CI), Model 2  | Reference | 0.81(0.72-0.91) | 0.75(0.67-0.85) | 0.72(0.64-0.81) | 0.64(0.56-0.72) | <0.0001 |
| Chronic liver disease |           |                 |                 |                 |                 |         |
| Events                | 35        | 36              | 25              | 30              | 19              |         |
| Person-years          | 130398.9  | 130501.9        | 130421.65       | 130516.88       | 130629.09       |         |

|                            |           |                 |                 |                 |                 |         |
|----------------------------|-----------|-----------------|-----------------|-----------------|-----------------|---------|
| HR (95% CI), Model 1       | Reference | 0.94(0.57-1.57) | 0.61(0.35-1.08) | 0.72(0.42-1.24) | 0.56(0.31-0.99) | 0.18    |
| HR (95% CI), Model 2       | Reference | 1.06(1.06-1.06) | 0.71(0.71-0.71) | 0.88(0.88-0.88) | 0.69(0.69-0.69) | 0.46    |
| Irritable bowel syndrome   |           |                 |                 |                 |                 |         |
| Events                     | 148       | 158             | 127             | 135             | 90              |         |
| Person-years               | 119061.83 | 120477.57       | 121173.71       | 121468.84       | 122296.7        |         |
| HR (95% CI), Model 1       | Reference | 1.03(0.82-1.29) | 0.82(0.65-1.04) | 0.86(0.68-1.09) | 0.57(0.44-0.74) | 0.0001  |
| HR (95% CI), Model 2       | Reference | 1.10(0.88-1.38) | 0.88(0.70-1.12) | 0.95(0.75-1.20) | 0.64(0.49-0.83) | 0.0013  |
| Inflammatory bowel disease |           |                 |                 |                 |                 |         |
| Events                     | 54        | 60              | 53              | 54              | 47              |         |
| Person-years               | 121776.25 | 122990.32       | 123221.75       | 123410.23       | 124144.08       |         |
| HR (95% CI), Model 1       | Reference | 1.10(0.76-1.59) | 0.96(0.65-1.40) | 0.96(0.66-1.41) | 0.82(0.56-1.22) | 0.70    |
| HR (95% CI), Model 2       | Reference | 1.14(0.79-1.66) | 1.00(0.68-1.46) | 1.02(0.69-1.49) | 0.87(0.58-1.30) | 0.75    |
| Treated constipation       |           |                 |                 |                 |                 |         |
| Events                     | 430       | 447             | 391             | 395             | 378             |         |
| Person-years               | 120807.6  | 121642.91       | 121862.5        | 121665.37       | 122825.96       |         |
| HR (95% CI), Model 1       | Reference | 0.97(0.85-1.11) | 0.82(0.71-0.94) | 0.80(0.70-0.92) | 0.74(0.65-0.85) | <0.0001 |
| HR (95% CI), Model 2       | Reference | 1.00(0.87-1.14) | 0.85(0.74-0.98) | 0.85(0.74-0.97) | 0.79(0.68-0.91) | 0.0013  |
| Dyspepsia                  |           |                 |                 |                 |                 |         |
| Events                     | 1289      | 1231            | 1110            | 1200            | 1101            |         |
| Person-years               | 102909.16 | 105929.22       | 106981.92       | 108023.39       | 108974.63       |         |
| HR (95% CI), Model 1       | Reference | 0.89(0.82-0.96) | 0.78(0.72-0.84) | 0.81(0.75-0.88) | 0.73(0.67-0.79) | <0.0001 |
| HR (95% CI), Model 2       | Reference | 0.94(0.87-1.01) | 0.83(0.76-0.90) | 0.88(0.81-0.96) | 0.80(0.74-0.87) | <0.0001 |
| Diverticular disease       |           |                 |                 |                 |                 |         |
| Events                     | 1006      | 1033            | 939             | 993             | 969             |         |
| Person-years               | 114628.46 | 115907          | 116852.79       | 116617.76       | 117337.14       |         |
| HR (95% CI), Model 1       | Reference | 0.97(0.89-1.05) | 0.84(0.77-0.92) | 0.87(0.80-0.95) | 0.82(0.75-0.90) | <0.0001 |
| HR (95% CI), Model 2       | Reference | 1.01(0.93-1.11) | 0.89(0.81-0.97) | 0.93(0.85-1.02) | 0.89(0.81-0.97) | 0.0042  |
| Pernicious anaemia         |           |                 |                 |                 |                 |         |
| Events                     | 28        | 22              | 18              | 17              | 16              |         |
| Person-years               | 130441.16 | 130529.98       | 130615.45       | 130704.39       | 130771.66       |         |
| HR (95% CI), Model 1       | Reference | 0.76(0.42-1.36) | 0.60(0.32-1.12) | 0.55(0.29-1.05) | 0.54(0.29-1.04) | 0.25    |
| HR (95% CI), Model 2       | Reference | 0.82(0.46-1.49) | 0.66(0.35-1.25) | 0.64(0.33-1.22) | 0.64(0.33-1.24) | 0.74    |
| Fracture                   |           |                 |                 |                 |                 |         |
| Events                     | 78        | 80              | 86              | 91              | 119             |         |
| Person-years               | 122769.63 | 123695.37       | 123655.69       | 123608.43       | 124191.82       |         |
| HR (95% CI), Model 1       | Reference | 0.94(0.69-1.28) | 0.97(0.72-1.32) | 0.99(0.73-1.33) | 1.25(0.94-1.67) | 0.22    |
| HR (95% CI), Model 2       | Reference | 0.90(0.66-1.23) | 0.92(0.67-1.25) | 0.91(0.67-1.23) | 1.14(0.85-1.52) | 0.40    |
| Osteoporosis               |           |                 |                 |                 |                 |         |
| Events                     | 745       | 763             | 713             | 759             | 709             |         |
| Person-years               | 109715.22 | 111882.31       | 110972.74       | 111117.14       | 112041.38       |         |
| HR (95% CI), Model 1       | Reference | 0.93(0.84-1.03) | 0.85(0.76-0.94) | 0.87(0.79-0.96) | 0.78(0.71-0.87) | <0.0001 |
| HR (95% CI), Model 2       | Reference | 1.01(0.91-1.12) | 0.95(0.85-1.05) | 1.00(0.90-1.11) | 0.93(0.83-1.03) | 0.36    |
| Meniere's disease          |           |                 |                 |                 |                 |         |
| Events                     | 7         | 13              | 17              | 15              | 6               |         |



|                                 |           |                 |                 |                 |                 |         |
|---------------------------------|-----------|-----------------|-----------------|-----------------|-----------------|---------|
| Person-years                    | 123206.28 | 124181.49       | 124262.47       | 124093.6        | 124867.58       |         |
| HR (95% CI), Model 1            | Reference | 1.78(0.71-4.47) | 2.28(0.94-5.51) | 1.98(0.80-4.87) | 0.77(0.26-2.31) | 0.11    |
| HR (95% CI), Model 2            | Reference | 1.91(0.76-4.80) | 2.49(1.02-6.04) | 2.21(0.89-5.50) | 0.89(0.29-2.69) | 0.0988  |
| Eczema                          |           |                 |                 |                 |                 |         |
| Events                          | 124       | 165             | 147             | 135             | 134             |         |
| Person-years                    | 117817.45 | 119354.68       | 118689.52       | 118921.69       | 120072.25       |         |
| HR (95% CI), Model 1            | Reference | 1.26(1.00-1.59) | 1.10(0.87-1.40) | 0.99(0.77-1.26) | 0.95(0.75-1.22) | 0.11    |
| HR (95% CI), Model 2            | Reference | 1.31(1.04-1.66) | 1.15(0.91-1.47) | 1.04(0.81-1.34) | 1.00(0.78-1.28) | 0.0866  |
| Glaucoma                        |           |                 |                 |                 |                 |         |
| Events                          | 159       | 189             | 208             | 197             | 195             |         |
| Person-years                    | 121896.94 | 122486.03       | 122438.28       | 122380.16       | 122684.3        |         |
| HR (95% CI), Model 1            | Reference | 1.09(0.88-1.34) | 1.15(0.93-1.41) | 1.04(0.84-1.28) | 0.99(0.80-1.22) | 0.59    |
| HR (95% CI), Model 2            | Reference | 1.07(0.86-1.32) | 1.11(0.90-1.37) | 1.00(0.81-1.24) | 0.95(0.77-1.18) | 0.57    |
| Cataract                        |           |                 |                 |                 |                 |         |
| Events                          | 813       | 915             | 916             | 958             | 972             |         |
| Person-years                    | 117254.67 | 117642.09       | 117379.98       | 117180.4        | 117484.54       |         |
| HR (95% CI), Model 1            | Reference | 1.01(0.91-1.11) | 0.96(0.87-1.06) | 0.95(0.86-1.04) | 0.92(0.84-1.01) | 0.32    |
| HR (95% CI), Model 2            | Reference | 1.03(0.93-1.13) | 0.99(0.90-1.09) | 0.98(0.89-1.08) | 0.96(0.87-1.06) | 0.72    |
| AMD                             |           |                 |                 |                 |                 |         |
| Events                          | 140       | 138             | 159             | 163             | 167             |         |
| Person-years                    | 122797.42 | 123990.51       | 123743.03       | 123684.47       | 124331.7        |         |
| HR (95% CI), Model 1            | Reference | 0.88(0.69-1.11) | 0.97(0.77-1.21) | 0.93(0.74-1.17) | 0.92(0.73-1.15) | 0.84    |
| HR (95% CI), Model 2            | Reference | 0.89(0.70-1.12) | 0.99(0.78-1.24) | 0.95(0.75-1.19) | 0.94(0.75-1.19) | 0.88    |
| Thyroid disorders               |           |                 |                 |                 |                 |         |
| Events                          | 297       | 266             | 273             | 266             | 197             |         |
| Person-years                    | 114449.89 | 115764.84       | 116474.35       | 116358.86       | 117780.89       |         |
| HR (95% CI), Model 1            | Reference | 0.84(0.71-0.99) | 0.84(0.71-0.99) | 0.80(0.68-0.95) | 0.58(0.49-0.70) | <0.0001 |
| HR (95% CI), Model 2            | Reference | 0.88(0.75-1.04) | 0.89(0.75-1.05) | 0.86(0.73-1.02) | 0.63(0.52-0.76) | <0.0001 |
| Prostate disorders <sup>¶</sup> |           |                 |                 |                 |                 |         |
| Events                          | 372       | 403             | 440             | 427             | 404             |         |
| Person-years                    | 52527.54  | 50225.1         | 50562.48        | 50722.09        | 52067.05        |         |
| HR (95% CI), Model 1            | Reference | 1.03(0.92-1.15) | 1.06(0.95-1.18) | 0.99(0.88-1.10) | 0.88(0.79-0.99) | 0.0105  |
| HR (95% CI), Model 2            | Reference | 1.04(0.93-1.16) | 1.07(0.96-1.19) | 0.99(0.89-1.11) | 0.89(0.79-1.00) | 0.0135  |

AMD, age related macular degeneration; CI, confidence interval; CKD, chronic kidney disease; COPD, chronic obstructive pulmonary disease; HR, hazard ratio.

\*Cox proportional hazard regression models were used to examine associations of the Anti-Empirical Dietary Inflammatory Index (quintiles) with the incidence of individual chronic diseases. The statistical tests were two-sided. Model 1 was adjusted for age and sex; Model 2 was adjusted for Model 1 plus ethnicity, education, income, smoking, alcohol consumption, sleep, physical activity, and GRS for longevity; Model 3 was adjusted for Model 2 and total energy intake.

†Cardiovascular disease includes coronary heart disease, heart failure, atrial fibrillation, other cardiac disease, stroke, and peripheral vascular disease.

‡All cancers encompass any type of cancer except for non-melanoma skin cancer.

<sup>§</sup>These analyses were conducted among women only.

<sup>¶</sup>These analyses were conducted among men only.

**Table S11. The association between the Alternate Healthy Eating Index-2010 and the incidence of individual chronic diseases among individuals with three or more dietary assessments**

|                                           | Alternate Healthy Eating Index-2010 |                 |                 |                 |                 | P-value<br>for trend* |
|-------------------------------------------|-------------------------------------|-----------------|-----------------|-----------------|-----------------|-----------------------|
|                                           | Quintile 1                          | Quintile 2      | Quintile 3      | Quintile 4      | Quintile 5      |                       |
| <b>Cardiovascular disease<sup>†</sup></b> |                                     |                 |                 |                 |                 |                       |
| Events                                    | 1207                                | 1104            | 1058            | 1001            | 984             |                       |
| Person-years                              | 114172.23                           | 115821.02       | 116801.25       | 117589.28       | 117932.14       |                       |
| HR (95% CI), Model 1                      | Reference                           | 0.89(0.82-0.96) | 0.82(0.76-0.90) | 0.77(0.71-0.84) | 0.77(0.70-0.83) | <0.0001               |
| HR (95% CI), Model 2                      | Reference                           | 0.92(0.85-1.00) | 0.87(0.80-0.95) | 0.83(0.76-0.90) | 0.83(0.76-0.90) | <0.0001               |
| <b>Coronary heart disease</b>             |                                     |                 |                 |                 |                 |                       |
| Events                                    | 660                                 | 576             | 583             | 512             | 519             |                       |
| Person-years                              | 118977.76                           | 120377.87       | 120740.36       | 121418.65       | 121864.19       |                       |
| HR (95% CI), Model 1                      | Reference                           | 0.86(0.77-0.96) | 0.86(0.77-0.96) | 0.76(0.67-0.85) | 0.78(0.69-0.87) | <0.0001               |
| HR (95% CI), Model 2                      | Reference                           | 0.90(0.81-1.01) | 0.92(0.82-1.03) | 0.82(0.73-0.93) | 0.86(0.76-0.97) | 0.0164                |
| <b>Heart failure</b>                      |                                     |                 |                 |                 |                 |                       |
| Events                                    | 214                                 | 177             | 162             | 169             | 162             |                       |
| Person-years                              | 122447.21                           | 123639.18       | 123919.35       | 124350.12       | 124573.83       |                       |
| HR (95% CI), Model 1                      | Reference                           | 0.80(0.65-0.97) | 0.71(0.58-0.88) | 0.74(0.60-0.90) | 0.71(0.58-0.87) | 0.0030                |
| HR (95% CI), Model 2                      | Reference                           | 0.85(0.70-1.04) | 0.79(0.64-0.97) | 0.83(0.68-1.02) | 0.82(0.67-1.01) | 0.17                  |
| <b>Atrial fibrillation</b>                |                                     |                 |                 |                 |                 |                       |
| Events                                    | 230                                 | 251             | 209             | 207             | 198             |                       |
| Person-years                              | 120729.05                           | 121921.26       | 122481.28       | 122759.31       | 123070.88       |                       |
| HR (95% CI), Model 1                      | Reference                           | 1.06(0.89-1.27) | 0.87(0.72-1.05) | 0.85(0.71-1.03) | 0.83(0.68-1.00) | 0.0294                |
| HR (95% CI), Model 2                      | Reference                           | 1.11(0.92-1.32) | 0.93(0.77-1.12) | 0.92(0.76-1.11) | 0.91(0.75-1.11) | 0.19                  |
| <b>Other cardiac disease</b>              |                                     |                 |                 |                 |                 |                       |
| Events                                    | 503                                 | 468             | 399             | 390             | 415             |                       |
| Person-years                              | 120978.44                           | 122011.85       | 122660.79       | 123224.85       | 123282.15       |                       |
| HR (95% CI), Model 1                      | Reference                           | 0.90(0.79-1.02) | 0.74(0.65-0.85) | 0.72(0.63-0.82) | 0.77(0.68-0.88) | <0.0001               |
| HR (95% CI), Model 2                      | Reference                           | 0.94(0.83-1.07) | 0.79(0.69-0.90) | 0.78(0.68-0.89) | 0.84(0.73-0.95) | 0.0004                |
| <b>Stroke</b>                             |                                     |                 |                 |                 |                 |                       |
| Events                                    | 94                                  | 100             | 109             | 73              | 66              |                       |
| Person-years                              | 122501.1                            | 123325.03       | 123803.03       | 124349.03       | 124598.46       |                       |
| HR (95% CI), Model 1                      | Reference                           | 1.03(0.78-1.36) | 1.10(0.83-1.45) | 0.73(0.53-0.99) | 0.66(0.48-0.90) | 0.0024                |
| HR (95% CI), Model 2                      | Reference                           | 1.07(0.80-1.42) | 1.15(0.87-1.51) | 0.76(0.56-1.04) | 0.70(0.51-0.96) | 0.0051                |
| <b>Peripheral vascular disease</b>        |                                     |                 |                 |                 |                 |                       |
| Events                                    | 117                                 | 113             | 87              | 115             | 91              |                       |
| Person-years                              | 122613.89                           | 123640.77       | 124118.74       | 124436.17       | 124613.87       |                       |
| HR (95% CI), Model 1                      | Reference                           | 0.93(0.72-1.21) | 0.70(0.53-0.93) | 0.92(0.71-1.19) | 0.73(0.55-0.96) | 0.0411                |
| HR (95% CI), Model 2                      | Reference                           | 0.98(0.76-1.27) | 0.75(0.56-0.99) | 1.00(0.77-1.30) | 0.78(0.59-1.03) | 0.0873                |
| <b>Hypertension</b>                       |                                     |                 |                 |                 |                 |                       |
| Events                                    | 554                                 | 502             | 466             | 400             | 411             |                       |
| Person-years                              | 89054                               | 91784.79        | 92783.82        | 94012.94        | 94655.1         |                       |
| HR (95% CI), Model 1                      | Reference                           | 0.85(0.76-0.96) | 0.77(0.68-0.87) | 0.65(0.57-0.74) | 0.66(0.58-0.75) | <0.0001               |
| HR (95% CI), Model 2                      | Reference                           | 0.91(0.81-1.03) | 0.83(0.74-0.94) | 0.73(0.64-0.83) | 0.75(0.66-0.86) | <0.0001               |

|                             |           |                 |                 |                 |                 |         |
|-----------------------------|-----------|-----------------|-----------------|-----------------|-----------------|---------|
| Diabetes                    |           |                 |                 |                 |                 |         |
| Events                      | 372       | 274             | 285             | 290             | 253             |         |
| Person-years                | 117802.55 | 119341.01       | 119825.34       | 119714.14       | 119894.84       |         |
| HR (95% CI), Model 1        | Reference | 0.73(0.62-0.85) | 0.75(0.64-0.87) | 0.76(0.65-0.89) | 0.67(0.57-0.79) | <0.0001 |
| HR (95% CI), Model 2        | Reference | 0.82(0.70-0.96) | 0.89(0.76-1.04) | 0.95(0.81-1.11) | 0.86(0.73-1.01) | 0.10    |
| All cancers <sup>‡</sup>    |           |                 |                 |                 |                 |         |
| Events                      | 859       | 746             | 752             | 737             | 697             |         |
| Person-years                | 110557.7  | 113284.15       | 113401.81       | 114094.05       | 114141.59       |         |
| HR (95% CI), Model 1        | Reference | 0.81(0.73-0.89) | 0.80(0.72-0.88) | 0.77(0.69-0.85) | 0.72(0.65-0.79) | <0.0001 |
| HR (95% CI), Model 2        | Reference | 0.84(0.76-0.93) | 0.84(0.76-0.93) | 0.82(0.74-0.90) | 0.77(0.70-0.86) | <0.0001 |
| Non-melanoma skin cancer    |           |                 |                 |                 |                 |         |
| Events                      | 450       | 438             | 455             | 452             | 424             |         |
| Person-years                | 119769.13 | 120898.38       | 121139.61       | 121554.7        | 121801.08       |         |
| HR (95% CI), Model 1        | Reference | 0.93(0.82-1.07) | 0.95(0.84-1.08) | 0.93(0.82-1.07) | 0.88(0.77-1.00) | 0.42    |
| HR (95% CI), Model 2        | Reference | 0.91(0.79-1.03) | 0.91(0.80-1.04) | 0.89(0.78-1.02) | 0.82(0.71-0.94) | 0.0768  |
| Melanoma                    |           |                 |                 |                 |                 |         |
| Events                      | 66        | 53              | 52              | 60              | 64              |         |
| Person-years                | 121837.6  | 123075.72       | 123217.31       | 123659.46       | 123797.65       |         |
| HR (95% CI), Model 1        | Reference | 0.77(0.54-1.11) | 0.74(0.52-1.07) | 0.85(0.60-1.21) | 0.90(0.63-1.27) | 0.50    |
| HR (95% CI), Model 2        | Reference | 0.76(0.53-1.10) | 0.74(0.51-1.07) | 0.85(0.60-1.21) | 0.91(0.64-1.29) | 0.46    |
| Lung cancer                 |           |                 |                 |                 |                 |         |
| Events                      | 107       | 62              | 72              | 71              | 63              |         |
| Person-years                | 122847.82 | 124120.25       | 124270.69       | 124728.71       | 124990.65       |         |
| HR (95% CI), Model 1        | Reference | 0.54(0.39-0.73) | 0.61(0.45-0.82) | 0.58(0.43-0.79) | 0.50(0.37-0.69) | <0.0001 |
| HR (95% CI), Model 2        | Reference | 0.65(0.48-0.88) | 0.76(0.57-1.01) | 0.77(0.58-1.03) | 0.74(0.54-0.99) | 0.0500  |
| Stomach cancer              |           |                 |                 |                 |                 |         |
| Events                      | 21        | 19              | 23              | 19              | 16              |         |
| Person-years                | 123249.8  | 124316.3        | 124512.93       | 124904.01       | 125149.78       |         |
| HR (95% CI), Model 1        | Reference | 0.92(0.49-1.71) | 1.12(0.62-2.03) | 0.94(0.50-1.75) | 0.82(0.43-1.59) | 0.91    |
| HR (95% CI), Model 2        | Reference | 0.95(0.51-1.78) | 1.19(0.66-2.16) | 1.01(0.54-1.89) | 0.90(0.46-1.75) | 0.93    |
| Oesophageal cancer          |           |                 |                 |                 |                 |         |
| Events                      | 27        | 22              | 29              | 17              | 25              |         |
| Person-years                | 123212.39 | 124290.35       | 124487.41       | 124974.94       | 125168.22       |         |
| HR (95% CI), Model 1        | Reference | 0.81(0.46-1.42) | 1.06(0.63-1.79) | 0.62(0.34-1.15) | 0.95(0.55-1.64) | 0.45    |
| HR (95% CI), Model 2        | Reference | 0.89(0.50-1.56) | 1.20(0.71-2.03) | 0.72(0.39-1.33) | 1.14(0.65-1.99) | 0.48    |
| Colon cancer                |           |                 |                 |                 |                 |         |
| Events                      | 107       | 106             | 113             | 96              | 81              |         |
| Person-years                | 122139.08 | 123588.69       | 123666          | 124229.31       | 124412.66       |         |
| HR (95% CI), Model 1        | Reference | 0.94(0.72-1.24) | 0.99(0.76-1.29) | 0.82(0.62-1.09) | 0.69(0.52-0.92) | 0.0695  |
| HR (95% CI), Model 2        | Reference | 0.98(0.75-1.28) | 1.04(0.80-1.36) | 0.88(0.67-1.17) | 0.75(0.56-1.01) | 0.20    |
| Ovarian cancer <sup>§</sup> |           |                 |                 |                 |                 |         |
| Events                      | 24        | 29              | 28              | 23              | 33              |         |
| Person-years                | 62052.67  | 71004.97        | 73998.89        | 77532.83        | 82911.81        |         |
| HR (95% CI), Model 1        | Reference | 1.00(0.58-1.72) | 0.91(0.53-1.57) | 0.70(0.39-1.23) | 0.91(0.53-1.54) | 0.71    |

|                              |           |                 |                 |                 |                 |         |
|------------------------------|-----------|-----------------|-----------------|-----------------|-----------------|---------|
| HR (95% CI), Model 2         | Reference | 1.02(0.59-1.75) | 0.93(0.54-1.60) | 0.71(0.40-1.26) | 0.92(0.54-1.57) | 0.73    |
| Breast cancer <sup>§</sup>   |           |                 |                 |                 |                 |         |
| Events                       | 225       | 224             | 235             | 221             | 265             |         |
| Person-years                 | 58157.3   | 66945.56        | 69725.92        | 73041.8         | 77853.51        |         |
| HR (95% CI), Model 1         | Reference | 0.85(0.71-1.02) | 0.85(0.71-1.02) | 0.75(0.63-0.91) | 0.84(0.70-1.00) | 0.0604  |
| HR (95% CI), Model 2         | Reference | 0.86(0.72-1.04) | 0.87(0.72-1.04) | 0.78(0.65-0.94) | 0.87(0.73-1.05) | 0.14    |
| Prostate cancer <sup>¶</sup> |           |                 |                 |                 |                 |         |
| Events                       | 294       | 274             | 296             | 226             | 185             |         |
| Person-years                 | 65906.84  | 57076.46        | 54441.04        | 51575.95        | 46445.63        |         |
| HR (95% CI), Model 1         | Reference | 1.07(0.93-1.22) | 1.16(1.02-1.32) | 0.99(0.86-1.14) | 0.93(0.81-1.07) | 0.0234  |
| HR (95% CI), Model 2         | Reference | 1.05(0.92-1.19) | 1.13(0.99-1.28) | 0.97(0.84-1.11) | 0.90(0.78-1.04) | 0.0266  |
| Other cancers                |           |                 |                 |                 |                 |         |
| Events                       | 741       | 666             | 623             | 624             | 588             |         |
| Person-years                 | 112890.84 | 115141.69       | 115529.45       | 116008.5        | 116195.48       |         |
| HR (95% CI), Model 1         | Reference | 0.85(0.76-0.94) | 0.77(0.69-0.86) | 0.76(0.68-0.84) | 0.71(0.63-0.79) | <0.0001 |
| HR (95% CI), Model 2         | Reference | 0.88(0.79-0.97) | 0.81(0.73-0.90) | 0.81(0.72-0.90) | 0.76(0.68-0.85) | <0.0001 |
| Depression                   |           |                 |                 |                 |                 |         |
| Events                       | 119       | 119             | 100             | 85              | 118             |         |
| Person-years                 | 115906.5  | 117226.38       | 117989.48       | 118624.08       | 118458.55       |         |
| HR (95% CI), Model 1         | Reference | 0.96(0.74-1.24) | 0.79(0.61-1.04) | 0.66(0.50-0.88) | 0.91(0.70-1.17) | 0.0313  |
| HR (95% CI), Model 2         | Reference | 1.02(0.79-1.31) | 0.85(0.65-1.11) | 0.72(0.54-0.96) | 0.97(0.75-1.27) | 0.0925  |
| Anxiety                      |           |                 |                 |                 |                 |         |
| Events                       | 361       | 358             | 329             | 305             | 374             |         |
| Person-years                 | 119634.23 | 120776.94       | 121283.32       | 121850.01       | 121376.24       |         |
| HR (95% CI), Model 1         | Reference | 0.93(0.80-1.07) | 0.83(0.71-0.96) | 0.75(0.64-0.87) | 0.89(0.77-1.03) | 0.0027  |
| HR (95% CI), Model 2         | Reference | 0.96(0.83-1.12) | 0.87(0.75-1.02) | 0.80(0.68-0.93) | 0.94(0.81-1.09) | 0.0314  |
| Schizophrenia                |           |                 |                 |                 |                 |         |
| Events                       | 21        | 11              | 13              | 14              | 12              |         |
| Person-years                 | 122975.77 | 123997.83       | 124163.45       | 124685.35       | 124874.91       |         |
| HR (95% CI), Model 1         | Reference | 0.51(0.25-1.06) | 0.60(0.30-1.20) | 0.64(0.32-1.26) | 0.54(0.26-1.10) | 0.3065  |
| HR (95% CI), Model 2         | Reference | 0.57(0.28-1.19) | 0.70(0.35-1.40) | 0.77(0.39-1.53) | 0.68(0.33-1.40) | 0.6163  |
| Alcohol use disorder         |           |                 |                 |                 |                 |         |
| Events                       | 179       | 98              | 73              | 64              | 38              |         |
| Person-years                 | 121987.21 | 123606.06       | 124016.34       | 124485.51       | 124846.7        |         |
| HR (95% CI), Model 1         | Reference | 0.56(0.44-0.71) | 0.42(0.32-0.55) | 0.37(0.28-0.49) | 0.22(0.16-0.32) | <0.0001 |
| HR (95% CI), Model 2         | Reference | 0.59(0.46-0.76) | 0.45(0.34-0.59) | 0.41(0.31-0.55) | 0.25(0.18-0.36) | <0.0001 |
| Psychoactive substance abuse |           |                 |                 |                 |                 |         |
| Events                       | 36        | 14              | 11              | 10              | 11              |         |
| Person-years                 | 123079.21 | 124261.43       | 124442.27       | 124965.61       | 125071.09       |         |
| HR (95% CI), Model 1         | Reference | 0.39(0.21-0.73) | 0.31(0.16-0.61) | 0.28(0.14-0.56) | 0.31(0.16-0.61) | <0.0001 |
| HR (95% CI), Model 2         | Reference | 0.44(0.44-0.44) | 0.35(0.35-0.35) | 0.33(0.33-0.33) | 0.37(0.37-0.37) | 0.0009  |
| Epilepsy                     |           |                 |                 |                 |                 |         |
| Events                       | 51        | 40              | 38              | 36              | 39              |         |
| Person-years                 | 122310.54 | 123400.99       | 123561.03       | 124107.83       | 124251.6        |         |

|                       |           |                 |                 |                 |                 |         |
|-----------------------|-----------|-----------------|-----------------|-----------------|-----------------|---------|
| HR (95% CI), Model 1  | Reference | 0.76(0.50-1.15) | 0.71(0.47-1.09) | 0.67(0.44-1.03) | 0.72(0.47-1.10) | 0.34    |
| HR (95% CI), Model 2  | Reference | 0.78(0.51-1.18) | 0.74(0.48-1.13) | 0.70(0.45-1.08) | 0.77(0.50-1.17) | 0.49    |
| Migraine              |           |                 |                 |                 |                 |         |
| Events                | 86        | 79              | 72              | 76              | 81              |         |
| Person-years          | 119773.68 | 120347          | 120429.61       | 120167.54       | 119985.96       |         |
| HR (95% CI), Model 1  | Reference | 0.88(0.65-1.19) | 0.79(0.58-1.09) | 0.83(0.61-1.13) | 0.87(0.64-1.19) | 0.66    |
| HR (95% CI), Model 2  | Reference | 0.89(0.66-1.21) | 0.81(0.59-1.11) | 0.85(0.62-1.16) | 0.88(0.65-1.20) | 0.75    |
| Dementia              |           |                 |                 |                 |                 |         |
| Events                | 97        | 66              | 81              | 67              | 90              |         |
| Person-years          | 123060.31 | 124261.39       | 124481.22       | 124890.68       | 125023.03       |         |
| HR (95% CI), Model 1  | Reference | 0.63(0.46-0.85) | 0.74(0.55-1.00) | 0.59(0.43-0.81) | 0.78(0.58-1.04) | 0.0071  |
| HR (95% CI), Model 2  | Reference | 0.64(0.47-0.88) | 0.76(0.56-1.02) | 0.61(0.44-0.83) | 0.80(0.59-1.07) | 0.0138  |
| Parkinson's disease   |           |                 |                 |                 |                 |         |
| Events                | 52        | 52              | 45              | 43              | 42              |         |
| Person-years          | 123053.98 | 124181.68       | 124290.66       | 124746.2        | 125025.86       |         |
| HR (95% CI), Model 1  | Reference | 0.96(0.65-1.41) | 0.81(0.54-1.21) | 0.77(0.51-1.15) | 0.75(0.50-1.14) | 0.53    |
| HR (95% CI), Model 2  | Reference | 0.96(0.65-1.41) | 0.80(0.53-1.19) | 0.76(0.50-1.14) | 0.73(0.48-1.11) | 0.46    |
| Multiple sclerosis    |           |                 |                 |                 |                 |         |
| Events                | 12        | 21              | 9               | 9               | 10              |         |
| Person-years          | 122761.7  | 123895.35       | 124130.31       | 124587.6        | 124696.11       |         |
| HR (95% CI), Model 1  | Reference | 1.71(0.84-3.48) | 0.73(0.31-1.74) | 0.73(0.31-1.73) | 0.80(0.34-1.87) | 0.0891  |
| HR (95% CI), Model 2  | Reference | 1.74(0.85-3.54) | 0.76(0.32-1.82) | 0.76(0.32-1.83) | 0.86(0.37-2.02) | 0.11    |
| Bronchiectasis        |           |                 |                 |                 |                 |         |
| Events                | 87        | 86              | 71              | 68              | 68              |         |
| Person-years          | 122675.13 | 123805.3        | 124006.32       | 124429.58       | 124683.77       |         |
| HR (95% CI), Model 1  | Reference | 0.90(0.67-1.22) | 0.72(0.52-0.98) | 0.66(0.48-0.91) | 0.64(0.46-0.88) | 0.0181  |
| HR (95% CI), Model 2  | Reference | 0.92(0.68-1.24) | 0.73(0.53-1.00) | 0.67(0.49-0.93) | 0.63(0.46-0.88) | 0.0207  |
| Asthma                |           |                 |                 |                 |                 |         |
| Events                | 245       | 188             | 208             | 189             | 183             |         |
| Person-years          | 105675.17 | 107237.64       | 108580.71       | 108276.43       | 108746.26       |         |
| HR (95% CI), Model 1  | Reference | 0.73(0.60-0.88) | 0.78(0.65-0.94) | 0.70(0.58-0.85) | 0.66(0.55-0.81) | 0.0002  |
| HR (95% CI), Model 2  | Reference | 0.76(0.63-0.92) | 0.83(0.69-1.00) | 0.75(0.62-0.91) | 0.71(0.58-0.86) | 0.0042  |
| COPD                  |           |                 |                 |                 |                 |         |
| Events                | 279       | 234             | 220             | 176             | 164             |         |
| Person-years          | 120761.86 | 121962.57       | 122584.65       | 123269.18       | 123457.11       |         |
| HR (95% CI), Model 1  | Reference | 0.79(0.67-0.94) | 0.72(0.61-0.86) | 0.56(0.47-0.68) | 0.52(0.43-0.63) | <0.0001 |
| HR (95% CI), Model 2  | Reference | 0.91(0.76-1.08) | 0.87(0.73-1.04) | 0.72(0.59-0.87) | 0.67(0.55-0.81) | 0.0002  |
| CKD                   |           |                 |                 |                 |                 |         |
| Events                | 572       | 554             | 483             | 447             | 435             |         |
| Person-years          | 120896.75 | 121828.24       | 122386.1        | 123199.58       | 123273.68       |         |
| HR (95% CI), Model 1  | Reference | 0.93(0.82-1.04) | 0.78(0.69-0.88) | 0.71(0.63-0.80) | 0.69(0.61-0.78) | <0.0001 |
| HR (95% CI), Model 2  | Reference | 0.99(0.88-1.11) | 0.86(0.76-0.97) | 0.79(0.70-0.90) | 0.78(0.69-0.89) | <0.0001 |
| Chronic liver disease |           |                 |                 |                 |                 |         |
| Events                | 40        | 37              | 24              | 21              | 23              |         |
| Person-years          | 130049.31 | 130383.3        | 130602.39       | 130604.71       | 130828.71       |         |

|                            |           |                 |                 |                 |                 |         |
|----------------------------|-----------|-----------------|-----------------|-----------------|-----------------|---------|
| HR (95% CI), Model 1       | Reference | 0.90(0.55-1.46) | 0.60(0.35-1.04) | 0.49(0.27-0.88) | 0.58(0.33-1.01) | 0.0593  |
| HR (95% CI), Model 2       | Reference | 0.99(0.99-0.99) | 0.70(0.70-0.70) | 0.59(0.59-0.59) | 0.74(0.74-0.74) | 0.32    |
| Irritable bowel syndrome   |           |                 |                 |                 |                 |         |
| Events                     | 152       | 140             | 117             | 118             | 131             |         |
| Person-years               | 119852.87 | 120649.95       | 121399.44       | 121184.1        | 121392.3        |         |
| HR (95% CI), Model 1       | Reference | 0.86(0.68-1.08) | 0.68(0.54-0.87) | 0.68(0.53-0.87) | 0.72(0.57-0.91) | 0.0042  |
| HR (95% CI), Model 2       | Reference | 0.89(0.71-1.12) | 0.73(0.57-0.93) | 0.73(0.57-0.93) | 0.78(0.62-0.99) | 0.0419  |
| Inflammatory bowel disease |           |                 |                 |                 |                 |         |
| Events                     | 65        | 51              | 57              | 58              | 37              |         |
| Person-years               | 121514.22 | 122883.61       | 123196.88       | 123828.12       | 124119.8        |         |
| HR (95% CI), Model 1       | Reference | 0.77(0.53-1.11) | 0.85(0.60-1.22) | 0.86(0.60-1.22) | 0.54(0.36-0.81) | 0.0545  |
| HR (95% CI), Model 2       | Reference | 0.80(0.55-1.15) | 0.89(0.62-1.28) | 0.91(0.63-1.30) | 0.57(0.38-0.86) | 0.0934  |
| Treated constipation       |           |                 |                 |                 |                 |         |
| Events                     | 453       | 420             | 380             | 368             | 420             |         |
| Person-years               | 120044    | 121665.48       | 121998.45       | 122487.01       | 122609.39       |         |
| HR (95% CI), Model 1       | Reference | 0.88(0.77-1.00) | 0.77(0.67-0.88) | 0.73(0.64-0.84) | 0.82(0.72-0.94) | 0.0001  |
| HR (95% CI), Model 2       | Reference | 0.89(0.78-1.02) | 0.78(0.68-0.90) | 0.75(0.65-0.86) | 0.83(0.73-0.95) | 0.0004  |
| Dyspepsia                  |           |                 |                 |                 |                 |         |
| Events                     | 1293      | 1234            | 1122            | 1141            | 1141            |         |
| Person-years               | 103891.58 | 105545.58       | 107785.16       | 107632.4        | 107963.59       |         |
| HR (95% CI), Model 1       | Reference | 0.91(0.84-0.98) | 0.79(0.73-0.86) | 0.80(0.74-0.87) | 0.79(0.73-0.85) | <0.0001 |
| HR (95% CI), Model 2       | Reference | 0.94(0.87-1.02) | 0.83(0.77-0.90) | 0.85(0.78-0.92) | 0.83(0.76-0.90) | <0.0001 |
| Diverticular disease       |           |                 |                 |                 |                 |         |
| Events                     | 1150      | 1013            | 980             | 930             | 867             |         |
| Person-years               | 113817.7  | 115624.69       | 116557.02       | 117370.9        | 117972.85       |         |
| HR (95% CI), Model 1       | Reference | 0.84(0.77-0.91) | 0.79(0.72-0.86) | 0.73(0.67-0.80) | 0.67(0.62-0.74) | <0.0001 |
| HR (95% CI), Model 2       | Reference | 0.87(0.80-0.95) | 0.84(0.77-0.92) | 0.80(0.73-0.87) | 0.74(0.68-0.81) | <0.0001 |
| Pernicious anaemia         |           |                 |                 |                 |                 |         |
| Events                     | 30        | 19              | 18              | 20              | 14              |         |
| Person-years               | 130170.77 | 130575.03       | 130727.94       | 130771.55       | 130817.36       |         |
| HR (95% CI), Model 1       | Reference | 0.57(0.31-1.05) | 0.56(0.30-1.04) | 0.62(0.34-1.13) | 0.48(0.25-0.92) | 0.15    |
| HR (95% CI), Model 2       | Reference | 0.59(0.59-0.59) | 0.59(0.59-0.59) | 0.66(0.66-0.66) | 0.50(0.26-0.97) | 0.23    |
| Fracture                   |           |                 |                 |                 |                 |         |
| Events                     | 88        | 83              | 81              | 89              | 113             |         |
| Person-years               | 122263.34 | 123589.75       | 123820.06       | 124082.23       | 124165.55       |         |
| HR (95% CI), Model 1       | Reference | 0.86(0.64-1.16) | 0.81(0.60-1.09) | 0.86(0.64-1.16) | 1.05(0.79-1.39) | 0.31    |
| HR (95% CI), Model 2       | Reference | 0.86(0.63-1.16) | 0.80(0.59-1.08) | 0.84(0.63-1.14) | 1.01(0.76-1.35) | 0.37    |
| Osteoporosis               |           |                 |                 |                 |                 |         |
| Events                     | 793       | 773             | 745             | 693             | 685             |         |
| Person-years               | 109659.15 | 111101.47       | 111331.01       | 111731.95       | 111905.21       |         |
| HR (95% CI), Model 1       | Reference | 0.90(0.81-0.99) | 0.84(0.76-0.92) | 0.76(0.68-0.84) | 0.73(0.65-0.80) | <0.0001 |
| HR (95% CI), Model 2       | Reference | 0.94(0.85-1.04) | 0.90(0.81-0.99) | 0.82(0.74-0.91) | 0.80(0.72-0.89) | <0.0001 |
| Meniere's disease          |           |                 |                 |                 |                 |         |
| Events                     | 17        | 7               | 8               | 14              | 12              |         |

|                                 |           |                 |                 |                 |                 |        |
|---------------------------------|-----------|-----------------|-----------------|-----------------|-----------------|--------|
| Person-years                    | 122853.28 | 124079.95       | 124281.59       | 124604.61       | 124791.98       |        |
| HR (95% CI), Model 1            | Reference | 0.40(0.16-0.95) | 0.44(0.19-1.03) | 0.77(0.38-1.57) | 0.65(0.31-1.37) | 0.18   |
| HR (95% CI), Model 2            | Reference | 0.40(0.17-0.97) | 0.46(0.20-1.08) | 0.81(0.39-1.65) | 0.70(0.33-1.48) | 0.21   |
| Eczema                          |           |                 |                 |                 |                 |        |
| Events                          | 184       | 137             | 129             | 119             | 136             |        |
| Person-years                    | 117338.86 | 118904.71       | 119044.5        | 119877.19       | 119690.33       |        |
| HR (95% CI), Model 1            | Reference | 0.72(0.57-0.89) | 0.67(0.53-0.84) | 0.61(0.48-0.77) | 0.69(0.55-0.87) | 0.0001 |
| HR (95% CI), Model 2            | Reference | 0.73(0.58-0.91) | 0.69(0.55-0.86) | 0.63(0.50-0.79) | 0.70(0.56-0.88) | 0.0006 |
| Glaucoma                        |           |                 |                 |                 |                 |        |
| Events                          | 175       | 186             | 176             | 202             | 209             |        |
| Person-years                    | 121333.49 | 122262.69       | 122539.5        | 122839.2        | 122910.83       |        |
| HR (95% CI), Model 1            | Reference | 1.01(0.82-1.24) | 0.93(0.76-1.15) | 1.06(0.86-1.30) | 1.09(0.89-1.33) | 0.64   |
| HR (95% CI), Model 2            | Reference | 1.01(0.82-1.25) | 0.93(0.75-1.15) | 1.05(0.85-1.29) | 1.06(0.86-1.30) | 0.74   |
| Cataract                        |           |                 |                 |                 |                 |        |
| Events                          | 874       | 895             | 884             | 968             | 953             |        |
| Person-years                    | 116414.08 | 117627.14       | 117787.98       | 117621.73       | 117490.75       |        |
| HR (95% CI), Model 1            | Reference | 0.93(0.84-1.02) | 0.88(0.80-0.96) | 0.94(0.86-1.03) | 0.89(0.81-0.98) | 0.0637 |
| HR (95% CI), Model 2            | Reference | 0.95(0.86-1.04) | 0.90(0.82-0.99) | 0.97(0.88-1.06) | 0.92(0.83-1.01) | 0.19   |
| AMD                             |           |                 |                 |                 |                 |        |
| Events                          | 149       | 139             | 156             | 155             | 168             |        |
| Person-years                    | 122572.32 | 123639.54       | 123898.84       | 124253.68       | 124182.76       |        |
| HR (95% CI), Model 1            | Reference | 0.85(0.67-1.07) | 0.91(0.73-1.14) | 0.87(0.69-1.09) | 0.90(0.72-1.13) | 0.66   |
| HR (95% CI), Model 2            | Reference | 0.85(0.67-1.07) | 0.92(0.73-1.16) | 0.88(0.70-1.11) | 0.90(0.72-1.13) | 0.71   |
| Thyroid disorders               |           |                 |                 |                 |                 |        |
| Events                          | 253       | 234             | 247             | 296             | 269             |        |
| Person-years                    | 115784.57 | 116506.69       | 116315.06       | 116419.53       | 115802.98       |        |
| HR (95% CI), Model 1            | Reference | 0.85(0.71-1.02) | 0.88(0.74-1.05) | 1.02(0.86-1.21) | 0.90(0.76-1.07) | 0.14   |
| HR (95% CI), Model 2            | Reference | 0.87(0.73-1.05) | 0.92(0.77-1.10) | 1.08(0.91-1.28) | 0.97(0.82-1.16) | 0.14   |
| Prostate disorders <sup>¶</sup> |           |                 |                 |                 |                 |        |
| Events                          | 512       | 428             | 394             | 386             | 326             |        |
| Person-years                    | 61269.76  | 53006.62        | 51203.03        | 47789.05        | 42835.8         |        |
| HR (95% CI), Model 1            | Reference | 0.97(0.87-1.07) | 0.86(0.78-0.96) | 0.95(0.86-1.06) | 0.86(0.77-0.96) | 0.0175 |
| HR (95% CI), Model 2            | Reference | 0.97(0.88-1.08) | 0.87(0.78-0.97) | 0.96(0.87-1.07) | 0.87(0.78-0.98) | 0.0271 |

AMD, age related macular degeneration; CI, confidence interval; CKD, chronic kidney disease; COPD, chronic obstructive pulmonary disease; HR, hazard ratio.

\*Cox proportional hazard regression models were used to examine associations of the Alternate Healthy Eating Index-2010 (quintiles) with the incidence of individual chronic diseases. The statistical tests were two-sided. Model 1 was adjusted for age and sex; Model 2 was adjusted for Model 1 plus ethnicity, education, income, smoking, alcohol consumption, sleep, physical activity, and GRS for longevity; Model 3 was adjusted for Model 2 and total energy intake.

†Cardiovascular disease includes coronary heart disease, heart failure, atrial fibrillation, other cardiac disease, stroke, and peripheral vascular disease.

‡All cancers encompass any type of cancer except for non-melanoma skin cancer.



<sup>§</sup>These analyses were conducted among women only.

<sup>¶</sup>These analyses were conducted among men only.

**Table S12. The association between the Healthful Plant-based Diet Index and the incidence of individual chronic diseases among individuals with three or more dietary assessments**

|                                           | Healthful Plant-based Diet Index |                 |                 |                 |                 | P-value<br>for trend* |
|-------------------------------------------|----------------------------------|-----------------|-----------------|-----------------|-----------------|-----------------------|
|                                           | Quintile 1                       | Quintile 2      | Quintile 3      | Quintile 4      | Quintile 5      |                       |
| <b>Cardiovascular disease<sup>†</sup></b> |                                  |                 |                 |                 |                 |                       |
| Events                                    | 1385                             | 826             | 916             | 1238            | 989             |                       |
| Person-years                              | 128785.15                        | 88270.18        | 102205.13       | 136520.04       | 126535.4        |                       |
| HR (95% CI), Model 1                      | Reference                        | 0.87(0.80-0.95) | 0.83(0.76-0.90) | 0.87(0.81-0.94) | 0.79(0.72-0.85) | <0.0001               |
| HR (95% CI), Model 2                      | Reference                        | 0.90(0.83-0.98) | 0.88(0.81-0.96) | 0.93(0.86-1.01) | 0.87(0.80-0.95) | 0.0068                |
| <b>Coronary heart disease</b>             |                                  |                 |                 |                 |                 |                       |
| Events                                    | 773                              | 455             | 492             | 637             | 493             |                       |
| Person-years                              | 134147.62                        | 91604.65        | 105793.33       | 141355.62       | 130477.59       |                       |
| HR (95% CI), Model 1                      | Reference                        | 0.88(0.78-0.99) | 0.83(0.74-0.93) | 0.84(0.76-0.94) | 0.75(0.67-0.85) | <0.0001               |
| HR (95% CI), Model 2                      | Reference                        | 0.92(0.82-1.03) | 0.89(0.79-1.00) | 0.92(0.83-1.03) | 0.85(0.76-0.96) | 0.10                  |
| <b>Heart failure</b>                      |                                  |                 |                 |                 |                 |                       |
| Events                                    | 235                              | 146             | 154             | 198             | 151             |                       |
| Person-years                              | 138443.54                        | 94206.07        | 108580.69       | 144492.7        | 133206.69       |                       |
| HR (95% CI), Model 1                      | Reference                        | 0.92(0.74-1.13) | 0.84(0.68-1.03) | 0.85(0.70-1.03) | 0.75(0.60-0.92) | 0.0935                |
| HR (95% CI), Model 2                      | Reference                        | 0.98(0.80-1.21) | 0.94(0.77-1.16) | 0.97(0.80-1.18) | 0.91(0.74-1.14) | 0.94                  |
| <b>Atrial fibrillation</b>                |                                  |                 |                 |                 |                 |                       |
| Events                                    | 293                              | 152             | 190             | 273             | 187             |                       |
| Person-years                              | 136302.47                        | 93064.07        | 107236.41       | 142674.8        | 131684.03       |                       |
| HR (95% CI), Model 1                      | Reference                        | 0.78(0.64-0.95) | 0.86(0.71-1.03) | 0.99(0.83-1.17) | 0.80(0.66-0.97) | 0.0197                |
| HR (95% CI), Model 2                      | Reference                        | 0.81(0.67-0.99) | 0.92(0.77-1.11) | 1.07(0.91-1.27) | 0.91(0.75-1.10) | 0.0574                |
| <b>Other cardiac disease</b>              |                                  |                 |                 |                 |                 |                       |
| Events                                    | 551                              | 358             | 357             | 493             | 416             |                       |
| Person-years                              | 136497.57                        | 93129.15        | 107403.33       | 143134.29       | 131993.74       |                       |
| HR (95% CI), Model 1                      | Reference                        | 0.94(0.82-1.07) | 0.81(0.71-0.92) | 0.86(0.76-0.98) | 0.82(0.72-0.94) | 0.0066                |
| HR (95% CI), Model 2                      | Reference                        | 0.98(0.86-1.12) | 0.86(0.75-0.99) | 0.93(0.82-1.05) | 0.91(0.79-1.04) | 0.21                  |
| <b>Stroke</b>                             |                                  |                 |                 |                 |                 |                       |
| Events                                    | 113                              | 67              | 74              | 115             | 73              |                       |
| Person-years                              | 138322.69                        | 94234.1         | 108579.33       | 144409.09       | 133031.45       |                       |
| HR (95% CI), Model 1                      | Reference                        | 0.85(0.63-1.16) | 0.81(0.61-1.10) | 0.97(0.75-1.27) | 0.70(0.51-0.95) | 0.12                  |
| HR (95% CI), Model 2                      | Reference                        | 0.87(0.64-1.18) | 0.84(0.63-1.14) | 1.01(0.77-1.33) | 0.74(0.54-1.01) | 0.21                  |
| <b>Peripheral vascular disease</b>        |                                  |                 |                 |                 |                 |                       |
| Events                                    | 131                              | 74              | 95              | 121             | 102             |                       |
| Person-years                              | 138530.35                        | 94388.62        | 108671.57       | 144693.85       | 133139.04       |                       |
| HR (95% CI), Model 1                      | Reference                        | 0.81(0.61-1.07) | 0.89(0.68-1.16) | 0.85(0.66-1.10) | 0.79(0.60-1.04) | 0.45                  |
| HR (95% CI), Model 2                      | Reference                        | 0.82(0.62-1.10) | 0.92(0.71-1.21) | 0.90(0.70-1.16) | 0.85(0.64-1.11) | 0.68                  |
| <b>Hypertension</b>                       |                                  |                 |                 |                 |                 |                       |
| Events                                    | 624                              | 344             | 437             | 521             | 407             |                       |
| Person-years                              | 98617.7                          | 69215.58        | 80609.47        | 109498.95       | 104348.95       |                       |
| HR (95% CI), Model 1                      | Reference                        | 0.76(0.67-0.87) | 0.83(0.73-0.94) | 0.74(0.65-0.83) | 0.61(0.54-0.70) | <0.0001               |
| HR (95% CI), Model 2                      | Reference                        | 0.81(0.71-0.92) | 0.91(0.80-1.03) | 0.82(0.73-0.93) | 0.73(0.64-0.83) | <0.0001               |

|                             |           |                 |                 |                 |                 |         |
|-----------------------------|-----------|-----------------|-----------------|-----------------|-----------------|---------|
| Diabetes                    |           |                 |                 |                 |                 |         |
| Events                      | 463       | 252             | 268             | 266             | 225             |         |
| Person-years                | 131981.99 | 90771.49        | 104759.22       | 139909.14       | 129156.05       |         |
| HR (95% CI), Model 1        | Reference | 0.80(0.68-0.93) | 0.74(0.63-0.86) | 0.56(0.48-0.65) | 0.53(0.45-0.62) | <0.0001 |
| HR (95% CI), Model 2        | Reference | 0.90(0.77-1.05) | 0.88(0.76-1.03) | 0.71(0.61-0.83) | 0.75(0.63-0.89) | 0.0002  |
| All cancers <sup>‡</sup>    |           |                 |                 |                 |                 |         |
| Events                      | 950       | 586             | 678             | 843             | 734             |         |
| Person-years                | 125723.21 | 85677.56        | 99605.81        | 132053.09       | 122419.62       |         |
| HR (95% CI), Model 1        | Reference | 0.87(0.79-0.97) | 0.85(0.77-0.94) | 0.80(0.73-0.88) | 0.76(0.69-0.84) | <0.0001 |
| HR (95% CI), Model 2        | Reference | 0.89(0.81-0.99) | 0.89(0.80-0.98) | 0.84(0.76-0.92) | 0.81(0.74-0.90) | 0.0008  |
| Non-melanoma skin cancer    |           |                 |                 |                 |                 |         |
| Events                      | 523       | 337             | 404             | 504             | 451             |         |
| Person-years                | 135296.34 | 91993.69        | 106222.06       | 141380.52       | 130270.28       |         |
| HR (95% CI), Model 1        | Reference | 0.93(0.81-1.07) | 0.96(0.84-1.09) | 0.92(0.81-1.04) | 0.92(0.81-1.05) | 0.65    |
| HR (95% CI), Model 2        | Reference | 0.91(0.79-1.04) | 0.92(0.81-1.05) | 0.88(0.77-1.00) | 0.86(0.75-0.98) | 0.18    |
| Melanoma                    |           |                 |                 |                 |                 |         |
| Events                      | 69        | 45              | 64              | 51              | 66              |         |
| Person-years                | 138010.38 | 93722.62        | 108139.58       | 143502.6        | 132212.57       |         |
| HR (95% CI), Model 1        | Reference | 0.92(0.63-1.34) | 1.11(0.79-1.57) | 0.66(0.46-0.96) | 0.92(0.65-1.32) | 0.0830  |
| HR (95% CI), Model 2        | Reference | 0.91(0.63-1.33) | 1.10(0.78-1.56) | 0.66(0.45-0.95) | 0.91(0.64-1.31) | 0.0843  |
| Lung cancer                 |           |                 |                 |                 |                 |         |
| Events                      | 87        | 63              | 63              | 89              | 73              |         |
| Person-years                | 138978.39 | 94491.05        | 108979.71       | 144964.76       | 133544.21       |         |
| HR (95% CI), Model 1        | Reference | 0.99(0.71-1.37) | 0.83(0.60-1.15) | 0.86(0.64-1.17) | 0.76(0.55-1.05) | 0.44    |
| HR (95% CI), Model 2        | Reference | 1.15(0.84-1.56) | 1.01(0.74-1.38) | 1.04(0.77-1.38) | 0.99(0.72-1.35) | 0.90    |
| Stomach cancer              |           |                 |                 |                 |                 |         |
| Events                      | 26        | 15              | 21              | 20              | 16              |         |
| Person-years                | 139222.55 | 94788.15        | 109148.2        | 145225.01       | 133748.91       |         |
| HR (95% CI), Model 1        | Reference | 0.89(0.47-1.69) | 1.12(0.62-2.00) | 0.87(0.48-1.57) | 0.83(0.44-1.59) | 0.90    |
| HR (95% CI), Model 2        | Reference | 0.92(0.49-1.74) | 1.17(0.65-2.09) | 0.92(0.50-1.67) | 0.89(0.46-1.72) | 0.92    |
| Oesophageal cancer          |           |                 |                 |                 |                 |         |
| Events                      | 32        | 18              | 19              | 26              | 25              |         |
| Person-years                | 139206.95 | 94743.5         | 109171.84       | 145273.34       | 133737.67       |         |
| HR (95% CI), Model 1        | Reference | 0.84(0.47-1.51) | 0.78(0.44-1.38) | 0.86(0.50-1.45) | 0.97(0.56-1.67) | 0.91    |
| HR (95% CI), Model 2        | Reference | 0.91(0.51-1.63) | 0.89(0.50-1.58) | 1.00(0.59-1.71) | 1.22(0.70-2.12) | 0.86    |
| Colon cancer                |           |                 |                 |                 |                 |         |
| Events                      | 144       | 75              | 95              | 119             | 70              |         |
| Person-years                | 138061.95 | 94024.57        | 108387.16       | 144432.16       | 133129.89       |         |
| HR (95% CI), Model 1        | Reference | 0.75(0.57-0.99) | 0.82(0.63-1.07) | 0.79(0.61-1.01) | 0.52(0.39-0.70) | 0.0007  |
| HR (95% CI), Model 2        | Reference | 0.77(0.58-1.02) | 0.86(0.66-1.12) | 0.84(0.65-1.08) | 0.57(0.42-0.77) | 0.0063  |
| Ovarian cancer <sup>§</sup> |           |                 |                 |                 |                 |         |
| Events                      | 31        | 26              | 25              | 28              | 27              |         |
| Person-years                | 61307.32  | 51043.12        | 63234.19        | 94803.73        | 97112.81        |         |
| HR (95% CI), Model 1        | Reference | 0.98(0.58-1.66) | 0.76(0.45-1.29) | 0.56(0.34-0.95) | 0.54(0.32-0.91) | 0.0541  |

|                              |           |                 |                 |                 |                 |         |
|------------------------------|-----------|-----------------|-----------------|-----------------|-----------------|---------|
| HR (95% CI), Model 2         | Reference | 1.03(0.61-1.73) | 0.80(0.47-1.37) | 0.61(0.36-1.03) | 0.60(0.35-1.03) | 0.0640  |
| Breast cancer <sup>8</sup>   |           |                 |                 |                 |                 |         |
| Events                       | 198       | 170             | 198             | 303             | 301             |         |
| Person-years                 | 57669.29  | 48122.28        | 59523.44        | 89018.57        | 91390.52        |         |
| HR (95% CI), Model 1         | Reference | 1.03(0.84-1.26) | 0.97(0.79-1.18) | 0.99(0.83-1.19) | 0.97(0.81-1.17) | 0.98    |
| HR (95% CI), Model 2         | Reference | 1.04(0.85-1.28) | 0.99(0.81-1.21) | 1.03(0.86-1.24) | 1.02(0.84-1.23) | 0.99    |
| Prostate cancer <sup>1</sup> |           |                 |                 |                 |                 |         |
| Events                       | 385       | 197             | 246             | 275             | 172             |         |
| Person-years                 | 82897.03  | 47057.73        | 49948.06        | 55066.75        | 40476.35        |         |
| HR (95% CI), Model 1         | Reference | 0.95(0.80-1.13) | 1.07(0.95-1.19) | 1.12(0.99-1.27) | 0.96(0.83-1.11) | 0.15    |
| HR (95% CI), Model 2         | Reference | 0.94(0.79-1.12) | 1.04(0.93-1.17) | 1.09(0.97-1.24) | 0.93(0.80-1.07) | 0.18    |
| Other cancers                |           |                 |                 |                 |                 |         |
| Events                       | 829       | 500             | 563             | 718             | 632             |         |
| Person-years                 | 128059.99 | 87481.43        | 101213.18       | 134616.38       | 124394.98       |         |
| HR (95% CI), Model 1         | Reference | 0.85(0.76-0.95) | 0.81(0.73-0.91) | 0.78(0.70-0.86) | 0.75(0.67-0.83) | <0.0001 |
| HR (95% CI), Model 2         | Reference | 0.87(0.78-0.97) | 0.85(0.76-0.95) | 0.82(0.74-0.91) | 0.81(0.72-0.90) | 0.0005  |
| Depression                   |           |                 |                 |                 |                 |         |
| Events                       | 118       | 90              | 96              | 135             | 102             |         |
| Person-years                 | 131278.78 | 89463.73        | 102868.6        | 137643.34       | 126950.54       |         |
| HR (95% CI), Model 1         | Reference | 1.07(0.81-1.40) | 0.97(0.74-1.27) | 0.98(0.76-1.27) | 0.78(0.59-1.03) | 0.24    |
| HR (95% CI), Model 2         | Reference | 1.14(0.87-1.51) | 1.06(0.81-1.40) | 1.10(0.85-1.43) | 0.91(0.68-1.20) | 0.49    |
| Anxiety                      |           |                 |                 |                 |                 |         |
| Events                       | 394       | 289             | 295             | 386             | 363             |         |
| Person-years                 | 135465.21 | 91969.56        | 106182.29       | 141185.34       | 130118.35       |         |
| HR (95% CI), Model 1         | Reference | 1.01(0.87-1.18) | 0.88(0.75-1.02) | 0.83(0.72-0.96) | 0.82(0.71-0.95) | 0.0109  |
| HR (95% CI), Model 2         | Reference | 1.06(0.91-1.23) | 0.93(0.80-1.08) | 0.89(0.77-1.03) | 0.90(0.78-1.05) | 0.19    |
| Schizophrenia                |           |                 |                 |                 |                 |         |
| Events                       | 10        | 16              | 14              | 21              | 10              |         |
| Person-years                 | 138933.49 | 94513.59        | 108932.33       | 144894.64       | 133423.28       |         |
| HR (95% CI), Model 1         | Reference | 2.41(1.09-5.33) | 1.85(0.82-4.21) | 2.12(0.98-4.57) | 1.12(0.45-2.76) | 0.11    |
| HR (95% CI), Model 2         | Reference | 2.70(1.22-5.98) | 2.25(0.99-5.12) | 2.74(1.26-5.95) | 1.58(0.63-3.94) | 0.0691  |
| Alcohol use disorder         |           |                 |                 |                 |                 |         |
| Events                       | 125       | 85              | 90              | 93              | 59              |         |
| Person-years                 | 138243.17 | 94107.82        | 108521.08       | 144719.92       | 133349.83       |         |
| HR (95% CI), Model 1         | Reference | 1.08(0.82-1.42) | 1.02(0.78-1.35) | 0.85(0.65-1.12) | 0.64(0.46-0.88) | 0.0200  |
| HR (95% CI), Model 2         | Reference | 1.11(0.84-1.47) | 1.08(0.82-1.42) | 0.90(0.68-1.19) | 0.69(0.50-0.96) | 0.0536  |
| Psychoactive substance abuse |           |                 |                 |                 |                 |         |
| Events                       | 19        | 17              | 14              | 17              | 15              |         |
| Person-years                 | 139187.73 | 94740.04        | 109016.94       | 145219.15       | 133655.74       |         |
| HR (95% CI), Model 1         | Reference | 1.43(0.74-2.76) | 1.06(0.53-2.13) | 1.03(0.53-2.01) | 1.06(0.52-2.15) | 0.84    |
| HR (95% CI), Model 2         | Reference | 1.54(0.80-2.98) | 1.19(0.59-2.39) | 1.16(0.59-2.28) | 1.26(0.62-2.59) | 0.79    |
| Epilepsy                     |           |                 |                 |                 |                 |         |
| Events                       | 56        | 35              | 30              | 50              | 33              |         |
| Person-years                 | 138066.19 | 93915.4         | 108403.53       | 144409.04       | 132837.84       |         |

|                       |           |                 |                 |                 |                 |         |
|-----------------------|-----------|-----------------|-----------------|-----------------|-----------------|---------|
| HR (95% CI), Model 1  | Reference | 0.91(0.60-1.39) | 0.68(0.43-1.06) | 0.86(0.58-1.27) | 0.63(0.40-0.98) | 0.21    |
| HR (95% CI), Model 2  | Reference | 0.92(0.60-1.41) | 0.69(0.44-1.09) | 0.88(0.60-1.31) | 0.66(0.42-1.04) | 0.31    |
| Migraine              |           |                 |                 |                 |                 |         |
| Events                | 91        | 54              | 54              | 108             | 87              |         |
| Person-years          | 135058.88 | 91655.66        | 105501.26       | 139793.04       | 128694.94       |         |
| HR (95% CI), Model 1  | Reference | 0.79(0.57-1.11) | 0.66(0.47-0.93) | 0.94(0.70-1.25) | 0.77(0.56-1.04) | 0.0968  |
| HR (95% CI), Model 2  | Reference | 0.80(0.57-1.12) | 0.66(0.47-0.94) | 0.94(0.71-1.26) | 0.77(0.56-1.05) | 0.10    |
| Dementia              |           |                 |                 |                 |                 |         |
| Events                | 89        | 67              | 66              | 102             | 77              |         |
| Person-years          | 139138.08 | 94707.35        | 109078.71       | 145132.81       | 133659.67       |         |
| HR (95% CI), Model 1  | Reference | 1.04(0.76-1.44) | 0.87(0.63-1.20) | 1.02(0.76-1.36) | 0.86(0.63-1.18) | 0.65    |
| HR (95% CI), Model 2  | Reference | 1.07(0.78-1.47) | 0.90(0.65-1.24) | 1.05(0.78-1.41) | 0.90(0.65-1.24) | 0.73    |
| Parkinson's disease   |           |                 |                 |                 |                 |         |
| Events                | 54        | 33              | 43              | 62              | 42              |         |
| Person-years          | 138956.63 | 94658.56        | 108995.17       | 145115.12       | 133572.91       |         |
| HR (95% CI), Model 1  | Reference | 0.87(0.56-1.34) | 0.97(0.65-1.45) | 1.08(0.74-1.56) | 0.82(0.54-1.25) | 0.70    |
| HR (95% CI), Model 2  | Reference | 0.87(0.56-1.34) | 0.97(0.64-1.45) | 1.07(0.74-1.56) | 0.83(0.54-1.27) | 0.72    |
| Multiple sclerosis    |           |                 |                 |                 |                 |         |
| Events                | 10        | 9               | 16              | 14              | 12              |         |
| Person-years          | 138746.2  | 94524.47        | 108794.74       | 144787.17       | 133218.5        |         |
| HR (95% CI), Model 1  | Reference | 1.25(0.51-3.09) | 1.89(0.85-4.19) | 1.19(0.52-2.72) | 1.05(0.44-2.51) | 0.47    |
| HR (95% CI), Model 2  | Reference | 1.27(0.51-3.15) | 1.95(0.87-4.35) | 1.23(0.53-2.84) | 1.12(0.46-2.70) | 0.47    |
| Bronchiectasis        |           |                 |                 |                 |                 |         |
| Events                | 89        | 56              | 67              | 82              | 86              |         |
| Person-years          | 138627.29 | 94364.39        | 108702.67       | 144714.63       | 133191.12       |         |
| HR (95% CI), Model 1  | Reference | 0.85(0.61-1.19) | 0.85(0.62-1.18) | 0.76(0.56-1.04) | 0.86(0.63-1.18) | 0.55    |
| HR (95% CI), Model 2  | Reference | 0.86(0.62-1.21) | 0.86(0.62-1.19) | 0.77(0.57-1.05) | 0.87(0.63-1.19) | 0.61    |
| Asthma                |           |                 |                 |                 |                 |         |
| Events                | 246       | 156             | 185             | 232             | 194             |         |
| Person-years          | 119517.05 | 81642.17        | 94365.63        | 126437.26       | 116554.1        |         |
| HR (95% CI), Model 1  | Reference | 0.91(0.74-1.11) | 0.92(0.76-1.12) | 0.85(0.71-1.03) | 0.77(0.63-0.94) | 0.12    |
| HR (95% CI), Model 2  | Reference | 0.96(0.78-1.17) | 1.00(0.82-1.21) | 0.93(0.78-1.13) | 0.88(0.72-1.07) | 0.70    |
| COPD                  |           |                 |                 |                 |                 |         |
| Events                | 311       | 164             | 186             | 239             | 173             |         |
| Person-years          | 136357.04 | 93064.85        | 107425.14       | 143250.35       | 131938          |         |
| HR (95% CI), Model 1  | Reference | 0.74(0.61-0.89) | 0.71(0.59-0.86) | 0.69(0.58-0.82) | 0.55(0.45-0.66) | <0.0001 |
| HR (95% CI), Model 2  | Reference | 0.79(0.66-0.96) | 0.79(0.66-0.95) | 0.78(0.66-0.93) | 0.65(0.53-0.79) | 0.0005  |
| CKD                   |           |                 |                 |                 |                 |         |
| Events                | 713       | 409             | 455             | 550             | 364             |         |
| Person-years          | 136165.57 | 93080.77        | 107232.35       | 143065.74       | 132039.93       |         |
| HR (95% CI), Model 1  | Reference | 0.81(0.71-0.91) | 0.77(0.68-0.87) | 0.70(0.63-0.79) | 0.51(0.45-0.59) | <0.0001 |
| HR (95% CI), Model 2  | Reference | 0.86(0.76-0.98) | 0.86(0.76-0.97) | 0.80(0.72-0.90) | 0.62(0.54-0.71) | <0.0001 |
| Chronic liver disease |           |                 |                 |                 |                 |         |
| Events                | 50        | 27              | 16              | 33              | 19              |         |
| Person-years          | 146818.4  | 99860.94        | 114712.49       | 152134.06       | 138942.54       |         |

|                            |           |                 |                 |                 |                 |         |
|----------------------------|-----------|-----------------|-----------------|-----------------|-----------------|---------|
| HR (95% CI), Model 1       | Reference | 0.72(0.43-1.21) | 0.34(0.18-0.64) | 0.61(0.37-0.99) | 0.38(0.21-0.69) | 0.0020  |
| HR (95% CI), Model 2       | Reference | 0.80(0.80-0.80) | 0.41(0.41-0.41) | 0.76(0.76-0.76) | 0.53(0.53-0.53) | 0.0550  |
| Irritable bowel syndrome   |           |                 |                 |                 |                 |         |
| Events                     | 157       | 114             | 122             | 156             | 109             |         |
| Person-years               | 135011.67 | 92038.92        | 106138.51       | 141079.61       | 130209.94       |         |
| HR (95% CI), Model 1       | Reference | 0.98(0.77-1.24) | 0.88(0.69-1.12) | 0.80(0.64-1.00) | 0.58(0.45-0.74) | 0.0002  |
| HR (95% CI), Model 2       | Reference | 1.03(0.81-1.32) | 0.95(0.75-1.21) | 0.89(0.70-1.12) | 0.66(0.51-0.86) | 0.0096  |
| Inflammatory bowel disease |           |                 |                 |                 |                 |         |
| Events                     | 74        | 40              | 49              | 58              | 47              |         |
| Person-years               | 137159.85 | 93555.88        | 107934.92       | 144181.22       | 132710.77       |         |
| HR (95% CI), Model 1       | Reference | 0.81(0.55-1.19) | 0.87(0.60-1.25) | 0.78(0.55-1.11) | 0.70(0.48-1.03) | 0.43    |
| HR (95% CI), Model 2       | Reference | 0.83(0.56-1.22) | 0.91(0.63-1.31) | 0.83(0.58-1.18) | 0.76(0.52-1.12) | 0.68    |
| Treated constipation       |           |                 |                 |                 |                 |         |
| Events                     | 491       | 294             | 370             | 485             | 401             |         |
| Person-years               | 136194.75 | 92530.63        | 106843.28       | 142140.37       | 131095.31       |         |
| HR (95% CI), Model 1       | Reference | 0.84(0.72-0.97) | 0.89(0.78-1.03) | 0.87(0.76-0.99) | 0.77(0.68-0.89) | 0.0064  |
| HR (95% CI), Model 2       | Reference | 0.86(0.74-0.99) | 0.92(0.80-1.05) | 0.90(0.79-1.02) | 0.81(0.70-0.93) | 0.0453  |
| Dyspepsia                  |           |                 |                 |                 |                 |         |
| Events                     | 1473      | 913             | 1021            | 1325            | 1199            |         |
| Person-years               | 116892.22 | 80716.8         | 93441.44        | 124885.49       | 116882.37       |         |
| HR (95% CI), Model 1       | Reference | 0.86(0.80-0.94) | 0.82(0.76-0.89) | 0.79(0.73-0.85) | 0.75(0.70-0.82) | <0.0001 |
| HR (95% CI), Model 2       | Reference | 0.90(0.83-0.98) | 0.86(0.80-0.94) | 0.84(0.78-0.91) | 0.82(0.76-0.89) | <0.0001 |
| Diverticular disease       |           |                 |                 |                 |                 |         |
| Events                     | 1259      | 791             | 862             | 1139            | 889             |         |
| Person-years               | 128391.52 | 88236.93        | 101974.08       | 135980.26       | 126760.37       |         |
| HR (95% CI), Model 1       | Reference | 0.88(0.81-0.97) | 0.82(0.75-0.90) | 0.81(0.75-0.88) | 0.68(0.62-0.75) | <0.0001 |
| HR (95% CI), Model 2       | Reference | 0.92(0.84-1.01) | 0.87(0.80-0.95) | 0.88(0.81-0.95) | 0.76(0.69-0.83) | <0.0001 |
| Pernicious anaemia         |           |                 |                 |                 |                 |         |
| Events                     | 29        | 19              | 10              | 22              | 11              |         |
| Person-years               | 138770.94 | 94583.9         | 108929.1        | 145015.87       | 133411.1        |         |
| HR (95% CI), Model 1       | Reference | 0.87(0.49-1.56) | 0.38(0.19-0.79) | 0.60(0.34-1.06) | 0.31(0.15-0.63) | 0.0045  |
| HR (95% CI), Model 2       | Reference | 0.97(0.57-1.67) | 0.39(0.19-0.78) | 0.68(0.40-1.16) | 0.36(0.18-0.71) | 0.0052  |
| Fracture                   |           |                 |                 |                 |                 |         |
| Events                     | 90        | 68              | 72              | 100             | 124             |         |
| Person-years               | 138348.76 | 94128.89        | 108513.44       | 144298.19       | 132631.64       |         |
| HR (95% CI), Model 1       | Reference | 1.02(0.74-1.40) | 0.91(0.66-1.24) | 0.92(0.69-1.23) | 1.22(0.92-1.63) | 0.19    |
| HR (95% CI), Model 2       | Reference | 0.99(0.72-1.36) | 0.87(0.64-1.19) | 0.88(0.65-1.17) | 1.14(0.85-1.51) | 0.29    |
| Osteoporosis               |           |                 |                 |                 |                 |         |
| Events                     | 832       | 557             | 680             | 841             | 779             |         |
| Person-years               | 124397.79 | 84539.79        | 97338.39        | 129916.3        | 119536.53       |         |
| HR (95% CI), Model 1       | Reference | 0.91(0.82-1.02) | 0.94(0.85-1.04) | 0.85(0.77-0.94) | 0.84(0.76-0.93) | 0.0045  |
| HR (95% CI), Model 2       | Reference | 0.98(0.88-1.09) | 1.03(0.93-1.14) | 0.96(0.87-1.06) | 0.99(0.90-1.10) | 0.67    |
| Meniere's disease          |           |                 |                 |                 |                 |         |
| Events                     | 21        | 6               | 7               | 13              | 11              |         |

|                                 |           |                 |                 |                 |                 |        |
|---------------------------------|-----------|-----------------|-----------------|-----------------|-----------------|--------|
| Person-years                    | 138877.11 | 94579.62        | 108964.87       | 144894.77       | 133295.04       |        |
| HR (95% CI), Model 1            | Reference | 0.40(0.16-1.00) | 0.40(0.17-0.94) | 0.54(0.27-1.11) | 0.49(0.23-1.06) | 0.11   |
| HR (95% CI), Model 2            | Reference | 0.42(0.17-1.03) | 0.42(0.18-1.00) | 0.58(0.28-1.20) | 0.55(0.25-1.19) | 0.17   |
| Eczema                          |           |                 |                 |                 |                 |        |
| Events                          | 167       | 117             | 111             | 161             | 149             |        |
| Person-years                    | 132633.06 | 90495.66        | 104578.09       | 138986.5        | 128162.27       |        |
| HR (95% CI), Model 1            | Reference | 1.00(0.79-1.27) | 0.81(0.64-1.03) | 0.88(0.71-1.10) | 0.89(0.70-1.11) | 0.40   |
| HR (95% CI), Model 2            | Reference | 1.03(0.81-1.31) | 0.83(0.65-1.06) | 0.91(0.72-1.13) | 0.91(0.72-1.15) | 0.45   |
| Glaucoma                        |           |                 |                 |                 |                 |        |
| Events                          | 199       | 135             | 167             | 224             | 223             |        |
| Person-years                    | 136910.34 | 93280.94        | 107563.72       | 142864.17       | 131266.54       |        |
| HR (95% CI), Model 1            | Reference | 0.96(0.77-1.19) | 1.01(0.82-1.25) | 1.03(0.85-1.25) | 1.14(0.93-1.39) | 0.56   |
| HR (95% CI), Model 2            | Reference | 0.95(0.76-1.18) | 1.00(0.81-1.23) | 1.01(0.83-1.23) | 1.11(0.91-1.36) | 0.68   |
| Cataract                        |           |                 |                 |                 |                 |        |
| Events                          | 973       | 689             | 815             | 1079            | 1018            |        |
| Person-years                    | 131533.49 | 89401.91        | 103325.36       | 137003.42       | 125677.51       |        |
| HR (95% CI), Model 1            | Reference | 0.95(0.86-1.05) | 0.94(0.85-1.03) | 0.91(0.83-0.99) | 0.93(0.85-1.02) | 0.33   |
| HR (95% CI), Model 2            | Reference | 0.96(0.87-1.06) | 0.96(0.87-1.05) | 0.94(0.86-1.03) | 0.97(0.89-1.07) | 0.72   |
| AMD                             |           |                 |                 |                 |                 |        |
| Events                          | 171       | 105             | 129             | 189             | 173             |        |
| Person-years                    | 138495.86 | 94247.49        | 108523.73       | 144389.36       | 132890.7        |        |
| HR (95% CI), Model 1            | Reference | 0.83(0.65-1.06) | 0.86(0.69-1.09) | 0.93(0.75-1.15) | 0.93(0.75-1.17) | 0.58   |
| HR (95% CI), Model 2            | Reference | 0.84(0.65-1.07) | 0.87(0.69-1.10) | 0.94(0.76-1.16) | 0.94(0.75-1.18) | 0.62   |
| Thyroid disorders               |           |                 |                 |                 |                 |        |
| Events                          | 273       | 203             | 219             | 304             | 300             |        |
| Person-years                    | 131360.02 | 88601.49        | 102117.43       | 134993.16       | 123756.73       |        |
| HR (95% CI), Model 1            | Reference | 0.99(0.82-1.18) | 0.88(0.74-1.06) | 0.87(0.74-1.03) | 0.88(0.75-1.05) | 0.36   |
| HR (95% CI), Model 2            | Reference | 1.02(0.85-1.23) | 0.93(0.78-1.12) | 0.94(0.79-1.11) | 0.99(0.83-1.17) | 0.82   |
| Prostate disorders <sup>¶</sup> |           |                 |                 |                 |                 |        |
| Events                          | 644       | 350             | 356             | 422             | 274             |        |
| Person-years                    | 77135.4   | 43741.15        | 46345.54        | 51001.07        | 37881.09        |        |
| HR (95% CI), Model 1            | Reference | 0.97(0.85-1.10) | 0.90(0.82-0.99) | 0.94(0.85-1.04) | 0.83(0.74-0.93) | 0.0204 |
| HR (95% CI), Model 2            | Reference | 0.97(0.85-1.11) | 0.90(0.83-0.99) | 0.94(0.85-1.04) | 0.84(0.75-0.94) | 0.0317 |

AMD, age related macular degeneration; CI, confidence interval; CKD, chronic kidney disease; COPD, chronic obstructive pulmonary disease; HR, hazard ratio.

\*Cox proportional hazard regression models were used to examine associations of the Healthful Plant-based Diet Index (quintiles) with the incidence of individual chronic diseases. The statistical tests were two-sided. Model 1 was adjusted for age and sex; Model 2 was adjusted for Model 1 plus ethnicity, education, income, smoking, alcohol consumption, sleep, physical activity, and GRS for longevity; Model 3 was adjusted for Model 2 and total energy intake.

†Cardiovascular disease includes coronary heart disease, heart failure, atrial fibrillation, other cardiac disease, stroke, and peripheral vascular disease.

‡All cancers encompass any type of cancer except for non-melanoma skin cancer.

<sup>§</sup>These analyses were conducted among women only.

<sup>¶</sup>These analyses were conducted among men only.



**Table S13. Field codes for diseases of interest**

| <b>Long term condition grouping</b>             | <b>Conditions included as reported by participants</b> | <b>Field Code</b> |
|-------------------------------------------------|--------------------------------------------------------|-------------------|
| 1. Hypertension                                 | Hypertension                                           | 1065              |
|                                                 | Essential Hypertension                                 | 1072              |
| 2. Depression                                   | Essential Depression                                   | 1072              |
|                                                 | Postnatal Depression                                   | 1531              |
| 3. Asthma                                       | Asthma                                                 | 1111              |
| 4. Atrial fibrillation                          | Atrial Fibrillation                                    | 1471              |
| 5. Coronary heart disease                       | Heart attack/Myocardial Infarction                     | 1075              |
|                                                 | Angina                                                 | 1074              |
| 6. Dyspepsia                                    | Gastro-oesophageal reflux (GORD)/gastric reflux        | 1138              |
|                                                 | Oesophagitis /Barrett's oesophagus                     | 1139              |
|                                                 | Gastric stomach ulcers                                 | 1142              |
|                                                 | Gastric erosions/gastritis                             | 1143              |
|                                                 | Duodenal ulcer                                         | 1457              |
|                                                 | Dyspepsia/indigestion                                  | 1510              |
|                                                 | Hiatus hernia                                          | 1474              |
|                                                 | Helicobacter pylori                                    | 1442              |
| 7. Diabetes                                     | Diabetic nephropathy                                   | 1607              |
|                                                 | Diabetic neuropathy/ulcers                             | 1468              |
|                                                 | Diabetes                                               | 1220              |
|                                                 | Type 1 diabetes                                        | 1222              |
|                                                 | Type 2 diabetes                                        | 1223              |
|                                                 | Diabetic eye disease                                   | 1276              |
|                                                 | Thyroid problem (not cancer)                           | 1224              |
| 8. Thyroid disorders                            | Hyperthyroidism/thyrotoxicosis                         | 1225              |
|                                                 | Hypothyroidism/myxoedema                               | 1226              |
|                                                 | Grave's disease                                        | 1522              |
|                                                 | Thyroid goitre                                         | 1610              |
|                                                 | Thyroiditis                                            | 1428              |
|                                                 | Thyroid cancer                                         | 1429              |
| 9. Chronic Obstructive Pulmonary Disease (COPD) | COPD/chronic obstructive airways disease               | 1112              |
|                                                 | Emphysema/chronic bronchitis                           | 1113              |
|                                                 | Emphysema                                              | 1472              |
| 10. Anxiety                                     | Anxiety/panic attacks                                  | 1287              |
|                                                 | Nervous breakdown                                      | 1288              |
|                                                 | Post-traumatic stress disorder                         | 1469              |
|                                                 | Obsessive compulsive disorder                          | 1615              |
|                                                 | Stress                                                 | 1614              |
|                                                 | Insomnia                                               | 1616              |
|                                                 | Psychological/psychiatric problem                      | 1243              |
| 11. Irritable bowel syndrome                    | Irritable bowel syndrome                               | 1154              |
| 12. Alcohol use disorder                        | Alcohol dependency                                     | 1408              |
|                                                 | Alcoholic liver disease/alcoholic cirrhosis            | 1604              |

|                                             |                                                     |      |
|---------------------------------------------|-----------------------------------------------------|------|
| 13. Other psychoactive substance abuse      | Opioid dependency                                   | 1409 |
|                                             | Other substance abuse/dependency                    | 1410 |
| 14. Treated constipation                    | Constipation                                        | 1599 |
| 15. Stroke/Transient Ischaemic Attack (TIA) | Stroke                                              | 1081 |
|                                             | TIA                                                 | 1082 |
|                                             | Subarachnoid haemorrhage                            | 1083 |
|                                             | Brain haemorrhage                                   | 1086 |
|                                             | Ischaemic stroke                                    | 1583 |
| 16. Chronic kidney disease                  | Polycystic kidney                                   | 1427 |
|                                             | Diabetic nephropathy                                | 1607 |
|                                             | Renal/kidney failure                                | 1192 |
|                                             | Renal failure requiring dialysis                    | 1193 |
|                                             | Renal failure not requiring dialysis                | 1194 |
|                                             | Kidney nephropathy                                  | 1519 |
|                                             | Immunoglobulin A (IgA) nephropathy                  | 1520 |
| 17. Diverticular disease                    | Diverticular disease                                | 1458 |
|                                             | Diverticulitis                                      | 1458 |
| 18. Peripheral vascular disease             | Peripheral vascular disease                         | 1067 |
|                                             | Leg claudication/intermittent claudication          | 1087 |
| 19. Heart failure                           | Cardiomyopathy                                      | 1079 |
|                                             | Hypertrophic cardiomyopathy                         | 1588 |
|                                             | Heart failure/pulmonary oedema                      | 1076 |
| 20. Prostate disorders                      | Prostate problem (not cancer)                       | 1207 |
|                                             | Enlarged prostate                                   | 1396 |
|                                             | Benign prostatic hypertrophy                        | 1516 |
| 21. Epilepsy                                | Epilepsy                                            | 1264 |
| 22. Dementia                                | Dementia, Alzheimer's disease, Cognitive impairment | 1263 |
| 23. Schizophrenia/bipolar disorder          | Schizophrenia                                       | 1289 |
|                                             | mania/bipolar disorder/manic depression             | 1291 |
| 24. Psoriasis/eczema                        | Eczema/dermatitis                                   | 1452 |
|                                             | Psoriasis                                           | 1453 |
| 25. Inflammatory Bowel Disease              | Inflammatory Bowel Disease                          | 1461 |
|                                             | Crohn's disease                                     | 1462 |
|                                             | Ulcerative colitis                                  | 1463 |
| 26. Migraine                                | Migraine                                            | 1265 |
| 27. Bronchiectasis                          | Bronchiectasis                                      | 1114 |
| 28. Parkinson's disease                     | Parkinson's disease                                 | 1262 |
| 29. Multiple Sclerosis                      | Multiple Sclerosis                                  | 1261 |
| 30. Osteoporosis                            | Osteoporosis                                        | 1465 |
| 31. Chronic liver disease                   | Oesophageal varices                                 | 1141 |
|                                             | Non infective hepatitis                             | 1157 |
|                                             | Liver failure/cirrhosis                             | 1158 |
|                                             | Primary biliary cirrhosis                           | 1506 |
| 32. Meniere's disease                       | Meniere's disease                                   | 1421 |

|                                               |                                         |      |
|-----------------------------------------------|-----------------------------------------|------|
| 33. Pernicious Anaemia                        | Pernicious Anaemia                      | 1331 |
| 34. Other heart/cardiac problem               | Heart/cardiac problem                   | 1066 |
| 35. Fracture                                  | Fracture pelvis                         | 1647 |
|                                               | Fracture neck of femur / hip            | 1648 |
|                                               | Fracture patella / knee                 | 1650 |
| 36. Glaucoma                                  | Glaucoma                                | 1277 |
| 37. Cataract                                  | Cataract                                | 1278 |
| 38. AMD                                       | AMD                                     | 1528 |
| 39. Lung Cancer                               | Lung Cancer                             | 1001 |
| 40. Skin Cancer                               | Non-melanoma Cancer                     | 1060 |
| 41. Melanoma                                  | Melanoma                                | 1059 |
| 42. Stomach Cancer                            | Stomach cancer                          | 1018 |
| 43. Oesophageal cancer                        | Lung Cancer                             | 1017 |
| 44. Colon cancer                              | Colon cancer                            | 1022 |
| 45. Prostate cancer                           | Prostate cancer                         | 1044 |
| 46. Ovarian cancer                            | Ovarian cancer                          | 1039 |
| 47. Breast cancer                             | Breast cancer                           | 1002 |
| 48. other cancers                             | Cancer of lip/mouth/pharynx/oral cavity | 1004 |
|                                               | Salivary gland cancer                   | 1005 |
|                                               | larynx/throat cancer                    | 1006 |
|                                               | nasal cavity cancer                     | 1007 |
|                                               | ear cancer                              | 1008 |
|                                               | sinus cancer                            | 1009 |
|                                               | lip cancer                              | 1010 |
|                                               | tongue cancer                           | 1011 |
|                                               | gum cancer                              | 1012 |
|                                               | parotid gland cancer                    | 1015 |
|                                               | other salivary gland cancer             | 1016 |
|                                               | small intestine/small bowel cancer      | 1019 |
|                                               | large bowel cancer/colorectal cancer    | 1020 |
|                                               | anal cancer                             | 1021 |
|                                               | liver/hepatocellular cancer             | 1024 |
|                                               | gallbladder/bile duct cancer            | 1025 |
|                                               | pancreas cancer                         | 1026 |
|                                               | small cell lung cancer                  | 1027 |
| non-small cell lung cancer                    | 1028                                    |      |
| peripheral nerve/autonomic nerve cancer       | 1029                                    |      |
| eye and/or adnexal cancer                     | 1030                                    |      |
| meningeal cancer / malignant meningioma       | 1031                                    |      |
| brain cancer / primary malignant brain tumour | 1032                                    |      |
| spinal cord or cranial nerve cancer           | 1033                                    |      |
| kidney/renal cell cancer                      | 1034                                    |      |
| bladder cancer                                | 1035                                    |      |

|                                      |      |
|--------------------------------------|------|
| other cancer of urinary tract        | 1036 |
| female genital tract cancer          | 1037 |
| male genital tract cancer            | 1038 |
| cervical cancer                      | 1041 |
| vaginal cancer                       | 1042 |
| vulval cancer                        | 1043 |
| testicular cancer                    | 1045 |
| penis cancer                         | 1046 |
| lymphoma                             | 1047 |
| leukaemia                            | 1048 |
| multiple myeloma                     | 1050 |
| myelofibrosis or myelodysplasia      | 1051 |
| hodgkins lymphoma / hodgkins disease | 1052 |
| non-hodgkins lymphoma                | 1053 |
| chronic lymphocytic                  | 1055 |
| chronic myeloid                      | 1056 |
| other haematological malignancy      | 1058 |
| basal cell carcinoma                 | 1061 |
| squamous cell carcinoma              | 1062 |
| primary bone cancer                  | 1063 |
| mesothelioma                         | 1064 |
| thyroid cancer                       | 1065 |
| parathyroid cancer                   | 1066 |
| adrenal cancer                       | 1067 |
| sarcoma/fibrosarcoma                 | 1068 |
| malignant lymph node, unspecified    | 1070 |
| metastatic cancer (unknown primary)  | 1071 |
| cin/pre-cancer cells cervix          | 1072 |
| rodent ulcer                         | 1073 |
| acute myeloid leukaemia              | 1074 |
| retinoblastoma                       | 1075 |
| kaposis sarcoma                      | 1076 |
| mouth cancer                         | 1077 |
| tonsil cancer                        | 1078 |
| oropharynx / oropharyngeal cancer    | 1079 |
| trachea cancer                       | 1080 |
| thymus cancer / malignant thymoma    | 1081 |
| heart / mediastinum cancer           | 1082 |
| respiratory / intrathoracic cancer   | 1084 |
| bone metastases / bony secondaries   | 1085 |
| appendix cancer                      | 1086 |
| fallopian tube cancer                | 1087 |
| malignant insulinoma                 | 1088 |

**Table S14. ICD codes for diseases of interest**

| Long term condition grouping        | Conditions included as reported by participants                                             | ICD10 code | ICD9 code |
|-------------------------------------|---------------------------------------------------------------------------------------------|------------|-----------|
| 1. Hypertension                     | Essential (primary) hypertension                                                            | I10        | 401       |
|                                     | Hypertensive heart disease                                                                  | I11        | 402       |
|                                     | Hypertensive heart disease with (congestive) heart failure                                  | I110       | 403       |
|                                     | Hypertensive heart disease without (congestive) heart failure                               | I119       | 404       |
|                                     | Hypertensive renal disease                                                                  | I12        | 405       |
|                                     | Hypertensive renal disease with renal failure                                               | I120       |           |
|                                     | Hypertensive renal disease without renal failure                                            | I129       |           |
|                                     | Hypertensive heart and renal disease                                                        | I13        |           |
|                                     | Hypertensive heart and renal disease with (congestive) heart failure                        | I130       |           |
|                                     | Hypertensive heart and renal disease with renal failure                                     | I131       |           |
|                                     | Hypertensive heart and renal disease with both (congestive) heart failure and renal failure | I132       |           |
|                                     | Hypertensive heart and renal disease, unspecified                                           | I139       |           |
|                                     | Secondary hypertension                                                                      | I15        |           |
|                                     | Renovascular hypertension                                                                   | I150       |           |
|                                     | Hypertension secondary to other renal disorders                                             | I151       |           |
|                                     | Hypertension secondary to endocrine disorders                                               | I152       |           |
| Other secondary hypertension        | I158                                                                                        |            |           |
| Secondary hypertension, unspecified | I159                                                                                        |            |           |
| 2. Depression                       | Depressive episode                                                                          | F32        | 2962      |
|                                     | Recurrent depressive disorder                                                               | F33        | 2963      |
|                                     | Dysthymia                                                                                   | F341       | 3004      |
|                                     | Other recurrent mood [affective] disorders                                                  | F381       | 311       |
|                                     | Postschizophrenic depression                                                                | F204       |           |
| 3. Asthma                           | Asthma                                                                                      | J45        | 493       |
|                                     | Predominantly allergic asthma                                                               | J450       |           |
|                                     | Nonallergic asthma                                                                          | J451       |           |
|                                     | Mixed asthma                                                                                | J458       |           |
|                                     | Asthma, unspecified                                                                         | J459       |           |
| 4. Atrial Fibrillation              | Atrial fibrillation and flutter                                                             | I48        | 427       |
|                                     | Paroxysmal atrial fibrillation                                                              | I480       |           |
|                                     | Persistent atrial fibrillation                                                              | I481       |           |
|                                     | Chronic atrial fibrillation                                                                 | I482       |           |
|                                     | Atrial fibrillation and atrial flutter, unspecified                                         | I489       |           |
| 5. Coronary heart disease           | Angina pectoris                                                                             | I20        | 413       |
|                                     | Acute myocardial infarction                                                                 | I21        | 410       |
|                                     | Subsequent myocardial infarction                                                            | I22        | 411       |
|                                     | Certain current complications following acute myocardial infarction                         | I23        | 412       |
|                                     | Other acute ischaemic heart diseases                                                        | I24        | 414       |
|                                     | Chronic ischaemic heart disease                                                             | I25        |           |
| 6. Dyspepsia                        | Gastro-oesophageal reflux disease                                                           | K21        | 53081     |
|                                     | Gastro-oesophageal reflux disease with oesophagitis                                         | K210       | 5368      |

|                                                 |                                                                                      |             |             |
|-------------------------------------------------|--------------------------------------------------------------------------------------|-------------|-------------|
|                                                 | Gastro-oesophageal reflux disease without oesophagitis                               | K219        |             |
|                                                 | Oesophagitis                                                                         | K20         |             |
|                                                 | Barrett's oesophagus                                                                 | K227        |             |
|                                                 | Other specified diseases of oesophagus                                               | K228        |             |
|                                                 | Disease of oesophagus, unspecified                                                   | K229        |             |
|                                                 | Disorders of oesophagus in diseases classified elsewhere                             | K23         |             |
|                                                 | Gastric ulcer                                                                        | K25         |             |
|                                                 | Gastritis and duodenitis                                                             | K29         |             |
|                                                 | Duodenal ulcer                                                                       | K26         |             |
|                                                 | Dyspepsia                                                                            | K30         |             |
|                                                 | Congenital hiatus hernia                                                             | Q401        |             |
|                                                 | Helicobacter pylori [H.pylori] as the cause of diseases classified to other chapters | B980        |             |
| 7. Diabetes                                     | Diabetic polyneuropathy                                                              | G632        | 250         |
|                                                 | Diabetic mononeuropathy                                                              | G590        |             |
|                                                 | Diabetic retinopathy                                                                 | H360        |             |
|                                                 | Diabetic cataract                                                                    | H280        |             |
|                                                 | Insulin-dependent diabetes mellitus                                                  | E10         |             |
|                                                 | Non-insulin-dependent diabetes mellitus                                              | E11         |             |
|                                                 | Malnutrition-related diabetes mellitus                                               | E12         |             |
|                                                 | Other specified diabetes mellitus                                                    | E13         |             |
|                                                 | Unspecified diabetes mellitus                                                        | E14         |             |
|                                                 | Congenital iodine-deficiency syndrome                                                | E00         | 240         |
| 8. Thyroid disorders                            | Thyrotoxicosis [hyperthyroidism]                                                     | E05         | 241         |
|                                                 | Other hypothyroidism                                                                 | E03         | 242         |
|                                                 | Other non-toxic goitre                                                               | E04         | 243         |
|                                                 | Iodine-deficiency-related thyroid disorders and allied conditions                    | E01         | 244         |
|                                                 | Thyroiditis                                                                          | E06         | 245         |
|                                                 | Other disorders of thyroid                                                           | E07         | 246         |
|                                                 | Subclinical iodine-deficiency hypothyroidism                                         | E02         |             |
| 9. Chronic obstructive pulmonary disease (COPD) | Simple and mucopurulent chronic bronchitis                                           | J41         | 491         |
|                                                 | Unspecified chronic bronchitis                                                       | J42         |             |
|                                                 | Emphysema                                                                            | J43         | 492         |
|                                                 | Other chronic obstructive pulmonary disease                                          | J44         | 494         |
| 10. Anxiety                                     | Phobic anxiety disorders                                                             | F40         | 3000        |
|                                                 | Other anxiety disorders                                                              | F41         | 3002        |
|                                                 | Reaction to severe stress, and adjustment disorders                                  | F43         | 3009        |
|                                                 | Posttraumatic stress disorder                                                        | F431        |             |
|                                                 | Obsessive-compulsive disorder                                                        | F42         | 3003        |
|                                                 | Stress, not elsewhere classified                                                     | Z733        | 308         |
|                                                 | Disorders of initiating and maintaining sleep [insomnias]                            | G470        | 7805        |
|                                                 | Mental disorder, not otherwise specified                                             | F99         |             |
| 11. Irritable bowel syndrome                    | Irritable bowel syndrome                                                             | K58         | 5641        |
|                                                 | Dependence syndrome                                                                  | <b>F102</b> | <b>3039</b> |

|                                        |         |                                                                                      |      |       |
|----------------------------------------|---------|--------------------------------------------------------------------------------------|------|-------|
| 12. Alcohol use disorder               | use     | Alcoholic liver disease                                                              | K70  | 291   |
|                                        |         | Harmful use                                                                          | F101 | 303   |
| 13. Other psychoactive substance abuse |         | Harmful use                                                                          | F111 | 304   |
|                                        |         | Acute intoxication                                                                   | F100 | 305   |
|                                        |         | Dependence syndrome                                                                  | F112 |       |
|                                        |         | Unspecified mental and behavioural disorder                                          | F119 |       |
| 14. constipation                       | Treated | Constipation                                                                         | K590 | 5640  |
| 15. Stroke/Transient Ischaemic (TIA)   | Attack  | Stroke, not specified as haemorrhage or infarction                                   | I64  | 438   |
|                                        |         | Occlusion and stenosis of precerebral arteries, not resulting in cerebral infarction | I65  | 435   |
|                                        |         | Subarachnoid haemorrhage                                                             | I60  | 430   |
|                                        |         | Intracerebral haemorrhage                                                            | I61  | 431   |
|                                        |         | Other nontraumatic intracranial haemorrhage                                          | I62  | 432   |
|                                        |         | Occlusion and stenosis of cerebral arteries, not resulting in cerebral infarction    | I66  | 433   |
|                                        |         | Cerebral infarction                                                                  | I63  | 434   |
|                                        |         | Acute but ill-defined cerebrovascular disease                                        |      | 436   |
|                                        |         | Other and ill-defined cerebrovascular disease                                        |      | 437   |
| 16. Chronic kidney disease             | kidney  | Polycystic kidney, infantile type                                                    | Q611 | 75315 |
|                                        |         | Polycystic kidney, adult type                                                        | Q612 |       |
|                                        |         | Polycystic kidney, unspecified                                                       | Q613 |       |
|                                        |         | Acute renal failure                                                                  | N17  | 584   |
|                                        |         | Chronic renal failure                                                                | N18  | 585   |
|                                        |         | Unspecified renal failure                                                            | N19  | 586   |
|                                        |         | Renal complications                                                                  | E112 | 587   |
|                                        |         | Other                                                                                | N028 | 588   |
| 17. Diverticular disease               |         | Diverticular disease of intestine                                                    | K57  | 562   |
| 18. Peripheral vascular disease        |         | Other aneurysm                                                                       | I72  | 440   |
|                                        |         | Other peripheral vascular diseases                                                   | I73  | 443   |
|                                        |         | Arterial embolism and thrombosis                                                     |      | 444   |
| 19. Heart failure                      |         | Cardiomyopathy                                                                       | I42  | 425   |
|                                        |         | Heart failure                                                                        | I50  | 428   |
| 20. Prostate disorders                 |         | Hyperplasia of prostate                                                              | N40  | 600   |
|                                        |         | Inflammatory diseases of prostate                                                    | N41  | 601   |
|                                        |         | Other disorders of prostate                                                          | N42  | 602   |
|                                        |         | Disorders of prostate in diseases classified elsewhere                               | N510 |       |
| 21. Epilepsy                           |         | Epilepsy                                                                             | G40  | 345   |
| 22. Dementia                           |         | Creutzfeldt-Jakob disease                                                            | A810 | 290   |
|                                        |         | Dementia in Alzheimer's disease                                                      | F00  |       |
|                                        |         | Vascular dementia                                                                    | F01  |       |
|                                        |         | Unspecified dementia                                                                 | F03  |       |
|                                        |         | Delirium superimposed on dementia                                                    | F051 |       |
|                                        |         | Amnesic syndrome                                                                     | F106 |       |
|                                        |         | Alzheimer's disease                                                                  | G30  |       |
|                                        |         | Other degenerative diseases of nervous system, not elsewhere classified              | G31  |       |

|                                    |  |                                                                        |       |      |
|------------------------------------|--|------------------------------------------------------------------------|-------|------|
|                                    |  | Progressive vascular leukoencephalopathy                               | I673  |      |
| 23. Schizophrenia/bipolar disorder |  | Schizophrenia                                                          | F20   | 295  |
|                                    |  | Schizotypal disorder                                                   | F21   |      |
|                                    |  | Manic episode                                                          | F30   | 296  |
|                                    |  | Bipolar affective disorder                                             | F31   |      |
| 24. Psoriasis/eczema               |  | Atopic dermatitis                                                      | L20   | 696  |
|                                    |  | Seborrhoeic dermatitis                                                 | L21   | 692  |
|                                    |  | Diaper [napkin] dermatitis                                             | L22   |      |
|                                    |  | Allergic contact dermatitis                                            | L23   |      |
|                                    |  | Irritant contact dermatitis                                            | L24   |      |
|                                    |  | Unspecified contact dermatitis                                         | L25   |      |
|                                    |  | Exfoliative dermatitis                                                 | L26   |      |
|                                    |  | Dermatitis due to substances taken internally                          | L27   |      |
|                                    |  | Other dermatitis                                                       | L30   |      |
|                                    |  | Psoriasis                                                              | L40   |      |
|                                    |  | Parapsoriasis                                                          | L41   |      |
| 25. Inflammatory Bowel Disease     |  | Crohn's disease [regional enteritis]                                   | K50   |      |
|                                    |  | Ulcerative colitis                                                     | K51   |      |
| 26. Migraine                       |  | Migraine                                                               | G43   | 346  |
| 27. Bronchiectasis                 |  | Bronchiectasis                                                         | J47   | 494  |
| 28. Parkinson's disease            |  | Parkinson's disease                                                    | G20   | 332  |
|                                    |  | Secondary Parkinsonism                                                 | G21   | 3321 |
|                                    |  | Parkinsonism in diseases classified elsewhere                          | G22   | 333  |
|                                    |  | Other degenerative diseases of basal ganglia                           | G23   |      |
|                                    |  | Extrapyramidal and movement disorder, unspecified                      | G259  |      |
|                                    |  | Extrapyramidal and movement disorders in diseases classified elsewhere | G26   |      |
|                                    |  | Multisystem degeneration                                               | G903  |      |
| 29. Multiple Sclerosis             |  | Multiple sclerosis                                                     | G35   | 340  |
| 30. Chronic liver disease          |  | Oesophageal varices                                                    | I85   | 571  |
|                                    |  | Toxoplasma hepatitis                                                   | B581  |      |
|                                    |  | Alcoholic hepatitis                                                    | K701  |      |
|                                    |  | Toxic liver disease with acute hepatitis                               | K712  |      |
|                                    |  | Toxic liver disease with chronic persistent hepatitis                  | K713  |      |
|                                    |  | Toxic liver disease with chronic lobular hepatitis                     | K714  |      |
|                                    |  | Toxic liver disease with chronic active hepatitis                      | K715  |      |
|                                    |  | Toxic liver disease with hepatitis, not elsewhere classified           | K716  |      |
|                                    |  | Fibrosis and cirrhosis of liver                                        | K74   |      |
|                                    |  | Primary biliary cirrhosis                                              | K743  |      |
| 31. Osteoporosis                   |  | Polyarthrosis                                                          | M15   | 7330 |
|                                    |  | Primary generalised (osteo)arthrosis                                   | M150  |      |
|                                    |  | Primary generalized (osteo)arthrosis, Multiple sites                   | M1500 |      |
|                                    |  | Heberden's nodes (with arthropathy)                                    | M151  |      |
|                                    |  | Coxarthrosis [arthrosis of hip]                                        | M16   |      |
|                                    |  | Gonarthrosis [arthrosis of knee]                                       | M17   |      |



|                              |                                                                       |       |      |
|------------------------------|-----------------------------------------------------------------------|-------|------|
| 32. Meniere's disease        | Meniere's disease                                                     | H810  | 3860 |
| 33. Pernicious Anaemia       | Vitamin B12 deficiency anaemia                                        | D51   | 2810 |
| 34. Heart/cardiac problem    | Cardiac arrest                                                        | I46   | 393  |
|                              | Other cardiac arrhythmias                                             | I49   | 394  |
|                              | Complications and ill-defined descriptions of heart disease           | I51   | 395  |
|                              | Other heart disorders in diseases classified elsewhere                | I52   | 396  |
|                              | Other cerebrovascular diseases                                        | I67   | 397  |
|                              | Cerebrovascular disorders in diseases classified elsewhere            | I68   | 398  |
|                              | Sequelae of cerebrovascular disease                                   | I69   | 399  |
|                              | Atherosclerosis                                                       | I70   | 400  |
|                              | Acute pericarditis                                                    |       | 420  |
|                              | Acute and subacute endocarditis                                       |       | 421  |
|                              | Acute myocarditis                                                     |       | 422  |
|                              | Other diseases of pericardium                                         |       | 423  |
|                              | Other diseases of endocardium                                         |       | 424  |
|                              | Conduction disorders                                                  |       | 426  |
|                              | Cardiac dysrhythmias                                                  |       | 427  |
|                              | Ill-defined descriptions and complications of heart disease           |       | 429  |
| 35. Fracture                 | Multiple fractures of lumbar spine and pelvis                         | S327  | 808  |
|                              | Multiple fractures of lumbar spine and pelvis (closed)                | S3270 |      |
|                              | Fracture of femur                                                     | S72   | 820  |
|                              | Fracture of patella                                                   | S820  | 8210 |
|                              | Fracture of patella (closed)                                          | S8200 | 824  |
| 36. Glaucoma                 | Glaucoma                                                              | H40   | 365  |
| 37. Cataract                 | Senile cataract                                                       | H25   | 366  |
|                              | Other cataract                                                        | H26   |      |
|                              | Cataract and other disorders of lens in diseases classified elsewhere | H28   |      |
| 38. AMD                      | Degeneration of macula and posterior pole                             | H353  | 3625 |
| 39. Lung Cancer              | Malignant neoplasm of bronchus and lung                               | C34   | 162  |
| 40. non-melanoma skin cancer | Other malignant neoplasms of skin                                     | C44   | 173  |
|                              | Mesothelioma                                                          | C45   |      |
| 41. Melanoma                 | Malignant melanoma of skin                                            | C43   | 172  |
| 42. Stomach Cancer           | Malignant neoplasm of stomach                                         | C16   | 151  |
| 43. Oesophageal cancer       | Malignant neoplasm of oesophagus                                      | C15   | 150  |
| 44. Colon cancer             | Malignant neoplasm of colon                                           | C18   | 153  |
| 45. prostate cancer          | Malignant neoplasm of prostate                                        | C61   | 185  |
| 46. ovarian cancer           | Malignant neoplasm of ovary                                           | C56   | 183  |
| 47. Breast cancer            | Malignant neoplasm of breast                                          | C50   | 174  |
| 48. other cancers            | Malignant neoplasm of lip                                             | C00   | 140  |
|                              | Malignant neoplasm of base of tongue                                  | C01   | 141  |
|                              | Malignant neoplasm of other and unspecified parts of tongue           | C02   | 142  |
|                              | Malignant neoplasm of gum                                             | C03   | 143  |

---

|                                                                                                      |     |     |
|------------------------------------------------------------------------------------------------------|-----|-----|
| Malignant neoplasm of floor of mouth                                                                 | C04 | 144 |
| Malignant neoplasm of palate                                                                         | C05 | 145 |
| Malignant neoplasm of other and unspecified parts of mouth                                           | C06 | 146 |
| Malignant neoplasm of parotid gland                                                                  | C07 | 147 |
| Malignant neoplasm of other and unspecified major salivary glands                                    | C08 | 148 |
| Malignant neoplasm of tonsil                                                                         | C09 | 149 |
| Malignant neoplasm of oropharynx                                                                     | C10 | 152 |
| Malignant neoplasm of nasopharynx                                                                    | C11 | 155 |
| Malignant neoplasm of pyriform sinus                                                                 | C12 | 156 |
| Malignant neoplasm of hypopharynx                                                                    | C13 | 157 |
| Malignant neoplasm of other and ill-defined sites in the lip, oral cavity and pharynx                | C14 | 158 |
| Malignant neoplasm of small intestine                                                                | C17 | 159 |
| Malignant neoplasm of rectosigmoid junction                                                          | C19 | 160 |
| Malignant neoplasm of anus and anal canal                                                            | C21 | 161 |
| Malignant neoplasm of liver and intrahepatic bile ducts                                              | C22 | 163 |
| Malignant neoplasm of gallbladder                                                                    | C23 | 164 |
| Malignant neoplasm of other and unspecified parts of biliary tract                                   | C24 | 165 |
| Malignant neoplasm of pancreas                                                                       | C25 | 166 |
| Malignant neoplasm of other and ill-defined digestive organs                                         | C26 | 167 |
| Malignant neoplasm of nasal cavity and middle ear                                                    | C30 | 171 |
| Malignant neoplasm of accessory sinuses                                                              | C31 | 175 |
| Malignant neoplasm of larynx                                                                         | C32 | 176 |
| Malignant neoplasm of trachea                                                                        | C33 | 177 |
| Malignant neoplasm of thymus                                                                         | C37 | 180 |
| Malignant neoplasm of heart, mediastinum and pleura                                                  | C38 | 181 |
| Malignant neoplasm of other and ill-defined sites in the respiratory system and intrathoracic organs | C39 | 184 |
| Malignant neoplasm of bone and articular cartilage of limbs                                          | C40 | 186 |
| Malignant neoplasm of bone and articular cartilage of other and unspecified sites                    | C41 | 187 |
| hematopoietic and reticuloendothelial systems (ICD-O-3 specific)                                     | C42 | 188 |
| Kaposi's sarcoma                                                                                     | C46 | 189 |
| Malignant neoplasm of peripheral nerves and autonomic nervous system                                 | C47 | 190 |
| Malignant neoplasm of retroperitoneum and peritoneum                                                 | C48 | 191 |
| Malignant neoplasm of other connective and soft tissue                                               | C49 | 192 |
| Malignant neoplasm of vulva                                                                          | C51 | 193 |
| Malignant neoplasm of vagina                                                                         | C52 | 194 |
| Malignant neoplasm of cervix uteri                                                                   | C53 | 195 |
| Malignant neoplasm of corpus uteri                                                                   | C54 | 196 |
| Malignant neoplasm of other and unspecified female genital organs                                    | C57 | 197 |
| Malignant neoplasm of placenta                                                                       | C58 | 198 |
| Malignant neoplasm of penis                                                                          | C60 | 200 |
| Malignant neoplasm of testis                                                                         | C62 | 201 |
| Malignant neoplasm of other and unspecified male genital organs                                      | C63 | 202 |
| Malignant neoplasm of kidney, except renal pelvis                                                    | C64 | 203 |

---

---

|                                                                                             |     |     |
|---------------------------------------------------------------------------------------------|-----|-----|
| Malignant neoplasm of renal pelvis                                                          | C65 | 204 |
| Malignant neoplasm of ureter                                                                | C66 | 205 |
| Malignant neoplasm of bladder                                                               | C67 | 206 |
| Malignant neoplasm of other and unspecified urinary organs                                  | C68 | 207 |
| Malignant neoplasm of eye and adnexa                                                        | C69 | 208 |
| Malignant neoplasm of meninges                                                              | C70 |     |
| Malignant neoplasm of brain                                                                 | C71 |     |
| Malignant neoplasm of spinal cord, cranial nerves and other parts of central nervous system | C72 |     |
| Malignant neoplasm of thyroid gland                                                         | C73 |     |
| Malignant neoplasm of adrenal gland                                                         | C74 |     |
| Malignant neoplasm of other endocrine glands and related structures                         | C75 |     |
| Malignant neoplasm of other and ill-defined sites                                           | C76 |     |
| Secondary and unspecified malignant neoplasm of lymph nodes                                 | C77 |     |
| Secondary malignant neoplasm of respiratory and digestive organs                            | C78 |     |
| Secondary malignant neoplasm of other sites                                                 | C79 |     |
| Malignant neoplasm without specification of site                                            | C80 |     |
| Hodgkin's disease                                                                           | C81 |     |
| Follicular [nodular] non-Hodgkin's lymphoma                                                 | C82 |     |
| Diffuse non-Hodgkin's lymphoma                                                              | C83 |     |
| Peripheral and cutaneous T-cell lymphomas                                                   | C84 |     |
| Other and unspecified types of non-Hodgkin's lymphoma                                       | C85 |     |
| Other specified types of T/NK-cell lymphoma                                                 | C86 |     |
| Malignant immunoproliferative diseases                                                      | C88 |     |
| Multiple myeloma and malignant plasma cell neoplasms                                        | C90 |     |
| Lymphoid leukaemia                                                                          | C91 |     |
| Myeloid leukaemia                                                                           | C92 |     |
| Monocytic leukaemia                                                                         | C93 |     |
| Other leukaemias of specified cell type                                                     | C94 |     |
| Leukaemia of unspecified cell type                                                          | C95 |     |
| Other and unspecified malignant neoplasms of lymphoid, haematopoietic and related tissue    | C96 |     |
| Malignant neoplasms of independent (primary) multiple sites                                 | C97 |     |

---

**Table S15. Scoring for the Alternate Mediterranean Diet Index**

| Food groups          | Food items                                                                                                                                                                                                                                                                                                                                                         | Scoring              |                      |
|----------------------|--------------------------------------------------------------------------------------------------------------------------------------------------------------------------------------------------------------------------------------------------------------------------------------------------------------------------------------------------------------------|----------------------|----------------------|
|                      |                                                                                                                                                                                                                                                                                                                                                                    | Criteria for 0 point | Criteria for 1 point |
| Whole grains         | Porridge, muesli, oat crunch, bran cereal, cereal bar, non-white bread (flour types, brown, wholemeal, other type), seeded or other bread, crispbread, whole-wheat cereal, other cereal, whole meal pasta, brown rice, couscous, other cooked grains                                                                                                               | <2 servings/day      | ≥2 servings/day      |
| Fruits               | Mixed fruit, apple, banana, berries, cherries, grapefruit, grapes, mango, melon, orange, orange-like small fruits, peach/nectarine, pear, pineapple, plum, other fruits, stewed/cooked fruit, prunes, other dried fruit                                                                                                                                            | <2 servings/day      | ≥2 servings/day      |
| Vegetables           | Mixed vegetables, vegetable pieces, coleslaw, side salad, beetroot, broccoli, butternut squash, cabbage/kale, carrots, cauliflower, celery, courgette, cucumber, garlic, leeks, lettuce, mushrooms, onion, parsnip, sweet peppers, spinach, sprouts, sweetcorn, sweet potato, fresh tomatoes, cooked or tinned tomatoes, turnip/swede, watercress, other vegetable | <2 servings/day      | ≥2 servings/day      |
| Nuts                 | Salted peanuts, unsalted peanuts, salted nuts, unsalted nuts, seeds                                                                                                                                                                                                                                                                                                | <0.17 servings/day   | ≥0.17 servings/day   |
| Legumes              | Baked beans, other beans or lentils, broad beans, green beans, peas, soy or vegetable milk, vegetarian sausages/burgers, tofu, quorn, other vegetarian alternative                                                                                                                                                                                                 | 0 serving/day        | >0 serving/day       |
| Fish                 | Tinned tuna, oily fish, breaded fish, battered fish, white fish, prawns, lobster/crab, shellfish, other fish                                                                                                                                                                                                                                                       | 0 serving/day        | >0 serving/day       |
| Red meat             | Sausage, beef, pork, lamb, crumbed or deep-fried poultry, poultry, bacon, ham, liver, other meat                                                                                                                                                                                                                                                                   | ≥0.5 servings/day    | <0.5 servings/day    |
| Alcohol              | Red wine, white wine, rose wine, fortified wine, beer, spirit, others                                                                                                                                                                                                                                                                                              | <5 or >15 g/day      | 5-15 g/day           |
| Ratio of MUFA to SFA |                                                                                                                                                                                                                                                                                                                                                                    | <1.12 servings/day   | ≥1.12 servings/day   |

**Table S16. Scoring for the Empirical Dietary inflammatory index**

| Food groups            | Food items                                                                                                                                                                                           | Scoring       |               |                                |                                 |
|------------------------|------------------------------------------------------------------------------------------------------------------------------------------------------------------------------------------------------|---------------|---------------|--------------------------------|---------------------------------|
|                        |                                                                                                                                                                                                      | Minimum score | Maximum score | Criteria for minimum score (0) | Criteria for maximum score (10) |
| Processed meat         | Sausage, bacon, ham                                                                                                                                                                                  | 0             | 1.38          | 0 serving/day                  | ≥1 serving/day                  |
| Red meat               | Beef, pork, lamb                                                                                                                                                                                     |               |               |                                |                                 |
| Women                  |                                                                                                                                                                                                      | 0             | 1.33          | 0 serving/day                  | ≥0.5 serving/day                |
| Men                    |                                                                                                                                                                                                      | 0             | 1.33          | 0 serving/day                  | ≥0.75 serving/day               |
| Organ meat             | Liver                                                                                                                                                                                                | 0             | 0.4           | 0 serving/day                  | >0 serving/day                  |
| Fish                   | Tinned tuna, breaded fish, battered fish, white fish, prawns, lobster/crab, shellfish, other fish                                                                                                    | 0             | 0.35          | 0 serving/day                  | ≥0.5 serving/day                |
| Dark yellow vegetables | Carrots, sweet potato, butternut squash, beetroot, parsnip, turnip/swede                                                                                                                             |               |               |                                |                                 |
| Women                  |                                                                                                                                                                                                      | -0.78         | 0             | >0.75 serving/day              | 0 serving/day                   |
| Men                    |                                                                                                                                                                                                      | -0.78         | 0             | ≥0.5 serving/day               | 0 serving/day                   |
| Green leafy vegetables | Cabbage/kale, lettuce, spinach, watercress                                                                                                                                                           |               |               |                                |                                 |
| Women                  |                                                                                                                                                                                                      | -0.78         | 0             | >0.6 serving/day               | 0 serving/day                   |
| Men                    |                                                                                                                                                                                                      | -0.78         | 0             | ≥0.5 serving/day               | 0 serving/day                   |
| Other vegetables       | Other vegetable                                                                                                                                                                                      |               |               |                                |                                 |
| Women                  |                                                                                                                                                                                                      | 0             | 0.4           | 0 serving/day                  | ≥3.5 serving/day                |
| Men                    |                                                                                                                                                                                                      | 0             | 0.4           | 0 serving/day                  | ≥3.1 serving/day                |
| Refined grains         | Sweetened cereal, plain cereal, white bread, naan bread, garlic bread, white pasta, white rice, pancake, scotch pancake, croissant, scone, savoury or cheesy biscuits, other savoury snack, snackpot |               |               |                                |                                 |
| Women                  |                                                                                                                                                                                                      | 0             | 1.62          | 0 serving/day                  | ≥4 serving/day                  |
| Men                    |                                                                                                                                                                                                      | 0             | 1.62          | 0 serving/day                  | ≥5 serving/day                  |
| High-energy beverages  | Fizzy drink, fruit smoothie, dairy smoothie                                                                                                                                                          |               |               |                                |                                 |
| Women                  |                                                                                                                                                                                                      | 0             | 1.5           | 0 serving/day                  | ≥0.25 serving/day               |
| Men                    |                                                                                                                                                                                                      | 0             | 1.5           | 0 serving/day                  | ≥0.33 serving/day               |
| Low-energy beverages   | Low-energy beverages                                                                                                                                                                                 |               |               |                                |                                 |
| Women                  |                                                                                                                                                                                                      | 0             | 1.1           | 0 serving/day                  | ≥0.25 serving/day               |

|              |                                                                                   |       |      |                  |                   |
|--------------|-----------------------------------------------------------------------------------|-------|------|------------------|-------------------|
| Men          |                                                                                   | 0     | 1.1  | 0 serving/day    | >0 serving/day    |
| Tomato       | Tinned tomato, fresh tomato                                                       |       |      |                  |                   |
| Women        |                                                                                   | 0     | 0.92 | 0 serving/day    | ≥1 serving/day    |
| Men          |                                                                                   | 0     | 0.92 | 0 serving/day    | ≥0.56 serving/day |
| Beer         | Beer                                                                              |       |      |                  |                   |
| Women        |                                                                                   | -1.06 | 0    | >0 serving/day   | 0 serving/day     |
| Men          |                                                                                   | -1.06 | 0    | ≥1 serving/day   | 0 serving/day     |
| Wine         | Red wine, white wine, rose wine, fortified wine, spirit, others                   |       |      |                  |                   |
| Women        |                                                                                   | -2.11 | 0    | >1.5 serving/day | 0 serving/day     |
| Men          |                                                                                   | -2.11 | 0    | ≥2 serving/day   | 0 serving/day     |
| Tea          | Standard tea, rooibos tea, green tea, herbal tea, other tea                       |       |      |                  |                   |
| Women        |                                                                                   | 0     | 0.11 | 0 serving/day    | ≥4.5 serving/day  |
| Men          |                                                                                   | 0     | 0.11 | 0 serving/day    | ≥4 serving/day    |
| Coffee       | Instant coffee, filtered coffee, cappuccino, latte, espresso, other coffee drinks | -2.83 | 0    | ≥3 serving/day   | 0 serving/day     |
| Fruit juices | Orange juice, grapefruit juice, other fruit/vegetable juice                       | -0.22 | 0    | ≥1 serving/day   | 0 serving/day     |
| Snacks       | Fried potatoes, sweetcorn, crackers/crispbreads with butter/margarine             | -0.33 | 0    | ≥0.5 serving/day | 0 serving/day     |
| Pizza        | Pizza                                                                             | -0.44 | 0    | >0 serving/day   | 0 serving/day     |

**Table S17. Scoring for the Alternate Healthy Eating Index-2010**

| Food groups                                           | Scoring                        |                                 |
|-------------------------------------------------------|--------------------------------|---------------------------------|
|                                                       | Criteria for minimum score (0) | Criteria for maximum score (10) |
| Whole grains, servings/d                              |                                |                                 |
| Women                                                 | 0                              | ≥5                              |
| Men                                                   | 0                              | ≥6                              |
| Fruits, servings/d                                    | 0                              | ≥4                              |
| Vegetables, servings/d                                | 0                              | ≥5                              |
| Nuts and legumes, servings/d                          | 0                              | ≥1                              |
| Sugar-sweetened beverages and fruit juice, servings/d | ≥1                             | 0                               |
| Red meat/processed meat, servings/d                   | ≥1.5                           | 0                               |
| Fish, servings/d                                      | 0                              | ≥1                              |
| PUFA, % of energy                                     | ≤2                             | ≥10                             |
| Adding salt to foods                                  | Always                         | Never/rarely                    |
| Alcohol, drinks/d                                     |                                |                                 |
| Women                                                 | ≥2.5                           | 0.5–1.5                         |
| Men                                                   | ≥3.5                           | 0.5–2.0                         |

**Table S18. Scoring for the Healthful Plant-based Diet Index**

| Food groups                      | Food items                                                                                                                                                                                                                                                                                                                                                         | Scoring  |
|----------------------------------|--------------------------------------------------------------------------------------------------------------------------------------------------------------------------------------------------------------------------------------------------------------------------------------------------------------------------------------------------------------------|----------|
| Whole grains                     | Porridge, muesli, oat crunch, bran cereal, cereal bar, non-white bread (flour types, brown, wholemeal, other type), seeded or other bread, crispbread, whole-wheat cereal, other cereal, whole meal pasta, brown rice, couscous, other cooked grains                                                                                                               | Positive |
| Fruits                           | Mixed fruit, apple, banana, berries, cherries, grapefruit, grapes, mango, melon, orange, orange-like small fruits, peach/nectarine, pear, pineapple, plum, other fruits, stewed/cooked fruit, prunes, other dried fruit                                                                                                                                            | Positive |
| Vegetables                       | Mixed vegetables, vegetable pieces, coleslaw, side salad, beetroot, broccoli, butternut squash, cabbage/kale, carrots, cauliflower, celery, courgette, cucumber, garlic, leeks, lettuce, mushrooms, onion, parsnip, sweet peppers, spinach, sprouts, sweetcorn, sweet potato, fresh tomatoes, cooked or tinned tomatoes, turnip/swede, watercress, other vegetable | Positive |
| Nuts                             | Salted peanuts, unsalted peanuts, salted nuts, unsalted nuts, seeds                                                                                                                                                                                                                                                                                                | Positive |
| Legumes                          | Baked beans, other beans or lentils, broad beans, green beans, peas, soy or vegetable milk, vegetarian sausages/burgers, tofu, quorn, other vegetarian alternative                                                                                                                                                                                                 | Positive |
| Tea and coffee                   | Instant coffee, filtered coffee, cappuccino, latte, espresso, other coffee drinks, standard tea, rooibos tea, green tea, herbal tea, other tea                                                                                                                                                                                                                     | Positive |
| Refined grains                   | Sweetened cereal, plain cereal, white bread, naan bread, garlic bread, white pasta, white rice, pancake, scotch pancake, croissant, scone, savoury or cheesy biscuits, other savoury snack, snackpot                                                                                                                                                               | Reverse  |
| Potatoes                         | Fried potatoes, boiled/baked potatoes, mashed potatoes, crisps (e.g., potato chips)                                                                                                                                                                                                                                                                                | Reverse  |
| Sugary drinks                    | Low calorie or diet drinks (e.g. fizzy, squash), carbonated (fizzy) drinks, squash or cordial                                                                                                                                                                                                                                                                      | Reverse  |
| Fruit juices                     | Orange juice, grapefruit juice, other fruit/vegetable juice, fruit smoothie                                                                                                                                                                                                                                                                                        | Reverse  |
| Sweets and desserts              | Double crust pie, single crust pie/flan, crumble topping, Yorkshire pudding, Danish pastry, fruitcake, cake, doughnuts, sponge pudding, other dessert, chocolate bar, white chocolate, milk chocolate, dark chocolate, chocolate-covered raisin, chocolate sweet, diet sweets, chocolate-covered biscuits, chocolate biscuits, sweet biscuits, other sweets        | Reverse  |
| Animal fat                       | Butter on bread/crackers (spreadable, low fat, normal fat, or unknown type), dairy spread on bread/crackers (very low fat, low fat, normal fat, unknown type)                                                                                                                                                                                                      | Reverse  |
| Dairy                            | Milk, dairy smoothie, flavored milk, yogurt, ice-cream, low fat hard cheese, hard cheese, soft cheese, blue cheese, low fat cheese spread, cheese spread, cottage cheese, feta cheese, mozzarella cheese, goat's cheese, other cheese, cheesecake, milk-based pudding, other milk-based pudding                                                                    | Reverse  |
| Eggs                             | Whole eggs, omelettes or scrambled egg, eggs in sandwiches, scotch egg, other egg dishes                                                                                                                                                                                                                                                                           | Reverse  |
| Fish/seafood                     | Tinned tuna, oily fish, breaded fish, battered fish, white fish, prawns, lobster/crab, shellfish, other fish                                                                                                                                                                                                                                                       | Reverse  |
| Meat                             | Sausage, beef, pork, lamb, crumbed or deep-fried poultry, poultry, bacon, ham, liver, other meat                                                                                                                                                                                                                                                                   | Reverse  |
| Miscellaneous animal based foods | Pizza, Indian snacks                                                                                                                                                                                                                                                                                                                                               | Reverse  |
